# Supplementary material for: A facile access to N-sulfonylthioimidates and their use for the transformation to 3,4-dihydroquinazolines
Source: Royal Society of Chemistry journal article supplement (doi:10.1039/d0ob01963a), 2020-01-01

# Supporting Information

## **A facile access to *N*-sulfonylthioimidates and their use for the transformation to 3,4-dihydroquinazolines**

Jia-Yu Wu, Wei-Jr Liao, Xiu-Yi Lin, and Chien-Fu Liang\*

Department of Chemistry, National Chung Hsing University, Taichung 402, Taiwan.

\*E-mail: [lcf0201@dragon.nchu.edu.tw](mailto:lcf0201@dragon.nchu.edu.tw)

|                                           |    |
|-------------------------------------------|----|
| General Information and Procedure.....    | 2  |
| X-ray Data and Characterization Data..... | 3  |
| References.....                           | 23 |
| NMR Spectrum.....                         | 24 |

## 1. General Information:

Unless otherwise specified, all reactions were carried out under an atmosphere of nitrogen in flame-dried reaction vessels. The **1a** and **1g** were purchased from Acros and were used without further purification. The alkyne derivatives (**1b-1f**) were synthesized from the corresponding trimethylsilylacetylene following the literature procedure.<sup>1</sup> The **2o** was purchased from Aldrich and was used without further purification. The thiol molecules (**2a-2n**, **2p-2r**) were synthesized by following the literature procedure.<sup>2</sup>

<sup>1</sup>H NMR (400 MHz), <sup>13</sup>C NMR (100 MHz), and <sup>13</sup>C DEPT (100 MHz) spectra were recorded on a Varian 400 MHz spectrometer. The NMR spectra were recorded in CDCl<sub>3</sub> or (CD<sub>3</sub>)<sub>2</sub>CO. *d*-Chloroform (δ 7.26 ppm in <sup>1</sup>H NMR; δ 77.0 ppm in <sup>13</sup>C NMR) and *d*-acetone (δ 2.05 ppm in <sup>1</sup>H NMR; δ 29.84 ppm in <sup>13</sup>C NMR) were used as internal standards. The IR spectra were measured on a Thermo Scientific Nicolet iS5 FT-IR spectrophotometer. Thin layer chromatography (TLC) was performed on Merck silica gel plates 60 F<sub>254</sub> (0.25 mm). TLC plates were visualized under UV light (254 or 365 nm) and by treatment with *p*-anisaldehyde, KMnO<sub>4</sub> or cerium molybdate staining solution followed by heating. Flash column chromatography was carried out by using silica gel 60 (230–400 mesh, E. Merck). High-resolution mass spectrometry (HRMS) data were recorded on EI source. Melting points were measured by Thermo Scientific “Mel-Temp” type melting point apparatus and are uncorrected. Splitting patterns are reported as follows: s, singlet; d, doublet; t, triplet; q, quartet; p, pentet; m, multiplet; br, broad; dd, doublet of doublets; dt, doublet of triplets; td, triplet of doublets; tt, triplet of triplets. Coupling constants (J) are reported in Hz. Yields of products refer to chromatographically purified products unless otherwise stated.

## 2. General Procedure I:

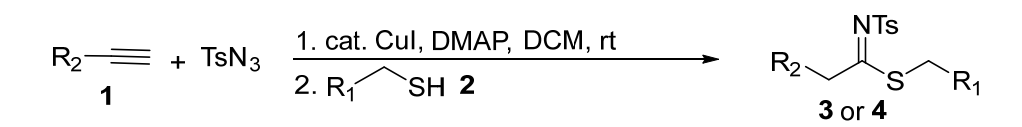

To a solution of terminal alkyne **1** (1.0 equiv) in DCM (0.3 M) was added *p*-toluenesulfonyl azide (1.2 equiv), DMAP (1.0 equiv) and CuI (0.2 equiv). The resulting solution was stirred at room temperature under nitrogen atmosphere for 1 hour. Then fresh prepared thiol **2** (3.0 equiv) was added to the reaction mixture and the reaction was stirred for several hours until the reaction was complete as indicated by TLC. The mixture was extracted with DCM for three times and the combined organic phase was washed with brine, dried over MgSO<sub>4</sub>, filtered and concentrated. The crude products were purified by flash column chromatography to afford the desired products **3a-3o** and **4b-4n**.

### 3. General Procedure II:

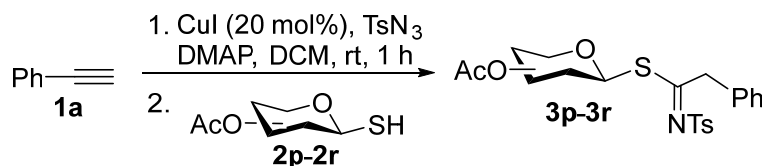

To a solution of terminal alkyne **1a** (1.0 equiv) in DCM (0.3 M) was added *p*-toluenesulfonyl azide (1.2 equiv), DMAP (1.0 equiv) and CuI (0.2 equiv). The resulting solution was stirred at room temperature under nitrogen atmosphere for 1 hour. Then fresh prepared β-glycosyl 1-thiol **2p-2r** (1.5 equiv) were added to the reaction mixture and the reaction was stirred for 0.5 h-1.5 h. The mixture was extracted with DCM for three times and the combined organic phase was washed with brine, dried over MgSO<sub>4</sub>, filtered and concentrated. The crude products were purified by flash column chromatography to afford the desired products **3p-3r**.

### 4. General Procedure III:

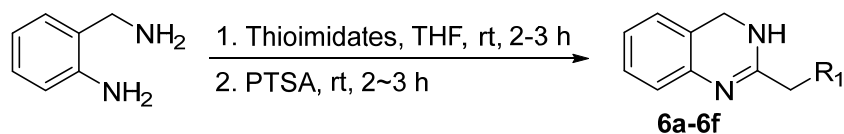

To a solution of thioimidates (1.0 equiv) in THF (0.3 M) was added 2-aminobenzylamine (1.2 equiv) stirred for 2-3 hours at room temperature under nitrogen atmosphere. Then, the *p*-toluenesulfonic acid monohydrate (2.0 equiv) was added to the reaction mixture and stirred for 2-3 hours until the reaction was complete as indicated by TLC. After the reaction was completed, the mixture was extracted with DCM for three times and the combined organic phase was washed with brine, dried over MgSO<sub>4</sub>, filtered and concentrated. The crude products were purified by flash column chromatography to afford the desired products **6a-6f**.

### X-ray Crystallographic Studies and the X-ray Data of **3b**

Single crystals of compound **3b** suitable for X-ray diffraction measurements was mounted on the Bruker D8 VENTURE and the unit cell was determined using Bruker SMART APEX 3 software suite to employ graphite-monochromated Mo-K $\alpha$  radiation ( $\lambda = 0.71073 \text{ \AA}$ ), and intensity data were collected with  $\omega$  scans. The data collection and reduction were performed with the CrysAlisPro software, and the absorptions were corrected by the SCALE3 ABSPACK multiscan method. The space-group

determination was based on a check of the Laue symmetry and systematic absences, and it was confirmed using the structure solution. The structure was solved and refined with the Olex2 1.2-ac21 package. Anisotropic thermal parameters were used for all non-H atoms, and fixed isotropic parameters were used for H atoms. CCDC 2004076 (**3b**) contains the supplementary crystallographic data for this paper. The checkCIF report is given below:

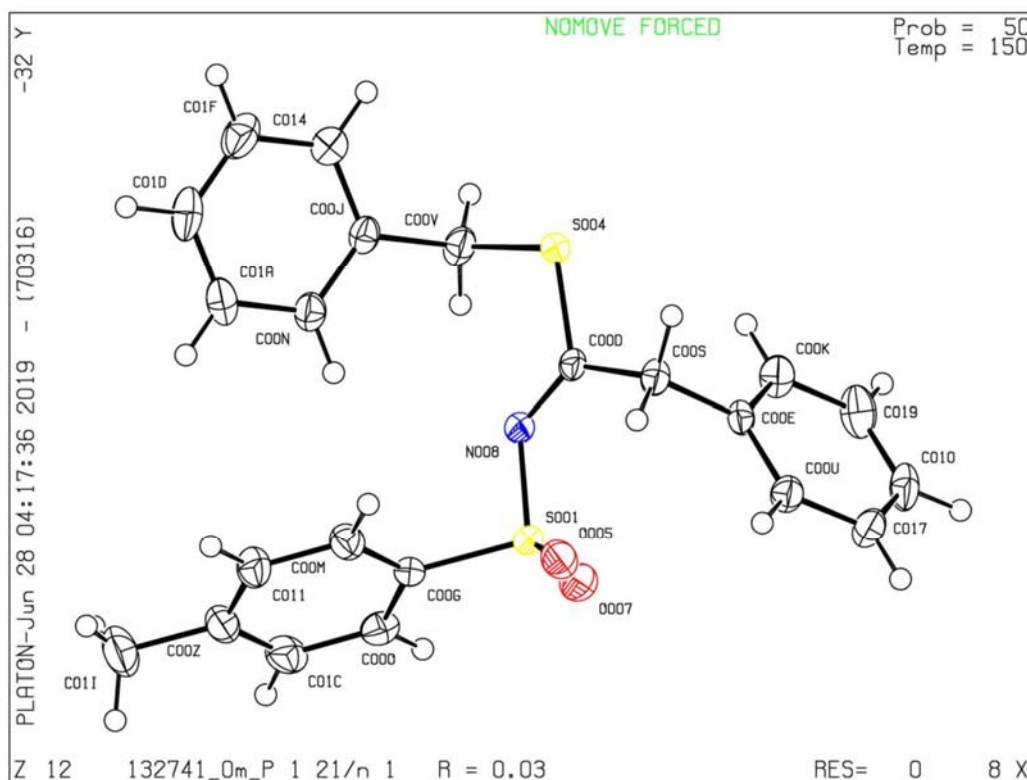



#### 4-Methoxybenzyl (*E*)-2-phenyl-*N*-tosylethananimidothioate (**3a**)

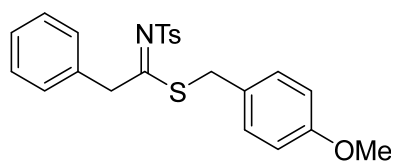

Following General Procedure I, using phenylacetylene (50.0 mg, 0.489 mmol), tosyl azide (116.0 mg, 0.587 mmol), and (4-methoxyphenyl)methanethiol (226.0 mg, 1.469 mmol). The product was purified by column chromatography (hexane/EtOAc, 5:1) to afford **3a** (167.0 mg, 80% yield) as a yellow solid. m.p. 59-60 °C; <sup>1</sup>H NMR (400 MHz, CDCl<sub>3</sub>): δ 7.86 (d, *J* = 8.3 Hz, 2H), 7.36-7.30 (m, 7H), 6.99 (d, *J* = 8.8, 2H), 6.70 (d, *J* = 8.8, 2H), 4.44 (s, 2H), 3.94 (s, 2H), 3.76 (s, 3H), 2.46 (s, 3H); <sup>13</sup>C NMR (100 MHz, CDCl<sub>3</sub>): δ 188.6, 158.9, 143.5, 138.5, 133.7, 130.2, 129.4, 129.0, 128.5, 127.6, 127.0, 113.8, 55.1, 44.1, 35.8, 21.5. HRMS (EI) *m/z*: [M]<sup>+</sup> calcd. for C<sub>23</sub>H<sub>23</sub>NO<sub>3</sub>S<sub>2</sub>: 425.1119, found: 425.1116.

#### Benzyl (*E*)-2-phenyl-*N*-tosylethananimidothioate (**3b**)

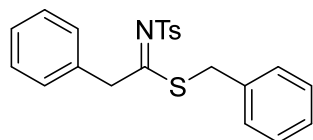

Following General Procedure I, using phenylacetylene (50.0 mg, 0.489 mmol), tosyl azide (116.0 mg, 0.587 mmol), and phenylmethanethiol (182.0 mg, 1.469 mmol). The product was purified by column chromatography (hexane/EtOAc, 5:1) to afford **3b** (143.0 mg, 74% yield) as a yellow solid. m.p. 69-71 °C; <sup>1</sup>H NMR (400 MHz, CDCl<sub>3</sub>): δ 7.85 (d, *J* = 8.3, 2H), 7.35-7.30 (m, 7H), 7.21-7.15 (m, 3H), 7.07 (dd, *J* = 7.8, 1.7 Hz, 2H), 4.45 (s, 2H), 3.98 (s, 2H), 2.46 (s, 3H); <sup>13</sup>C NMR (100 MHz, CDCl<sub>3</sub>): δ 188.4, 143.5, 138.5, 135.2, 133.7, 130.2, 129.4, 129.0, 128.5, 128.4, 127.7, 127.4, 127.0, 44.2, 36.3, 21.5. HRMS (EI) *m/z*: [M]<sup>+</sup> calcd. for C<sub>22</sub>H<sub>21</sub>NO<sub>2</sub>S<sub>2</sub>: 395.1014, found: 395.1010. CCDC number: 2004076

#### 3-Methoxybenzyl (*E*)-2-phenyl-*N*-tosylethananimidothioate (**3c**)

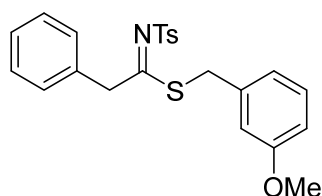

Following General Procedure I, using phenylacetylene (50.0 mg, 0.489 mmol), tosyl azide (116.0 mg, 0.587 mmol), and (3-methoxyphenyl) methanethiol (226.0 mg, 1.469 mmol). The product was purified by column chromatography (hexane/EtOAc, 5:1) to

afford **3c** (137.0 mg, 66% yield) as a yellow solid. m.p. 71-72 °C; <sup>1</sup>H NMR (400 MHz, CDCl<sub>3</sub>): δ 7.84 (d, *J* = 8.1 Hz, 2H), 7.35-7.29 (m, 7H), 7.09 (t, *J* = 8.1 Hz, 1H), 6.74 (d, *J* = 8.1 Hz, 1H), 6.67 (d, *J* = 6.8 Hz, 1H), 6.65 (s, 1H), 4.45 (s, 2H), 3.97 (s, 2H), 3.71 (s, 3H), 2.45 (s, 3H); <sup>13</sup>C NMR (100 MHz, CDCl<sub>3</sub>): δ 188.4, 159.5, 143.4, 138.4, 136.6, 133.6, 130.2, 129.4, 129.3, 128.5, 127.7, 126.9, 121.2, 114.3, 113.1, 55.0, 44.1, 36.2, 21.5. HRMS (EI) *m/z*: [M]<sup>+</sup> calcd. for C<sub>23</sub>H<sub>23</sub>NO<sub>3</sub>S<sub>2</sub>: 425.1119, found: 425.1114.

### 2-Methoxybenzyl (*E*)-2-phenyl-*N*-tosylethanimidothioate (**3d**)

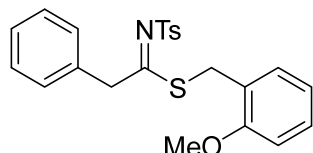

Following General Procedure I, using phenylacetylene (50.0 mg, 0.489 mmol), tosyl azide (116.0 mg, 0.587 mmol), and (2-methoxyphenyl)methanethiol (226.0 mg, 1.469 mmol). The product was purified by column chromatography (hexane/EtOAc, 5:1) to afford **3d** (162.0 mg, 78% yield) as a yellow solid. m.p. 90-92 °C; <sup>1</sup>H NMR (400 MHz, CDCl<sub>3</sub>): δ 7.88 (d, *J* = 8.3 Hz, 2H), 7.35-7.27 (m, 7H), 7.19 (td, *J* = 8.2, 1.7 Hz, 1H), 6.93 (dd, *J* = 7.4, 1.6 Hz, 1H), 6.78 (d, *J* = 8.2 Hz, 1H), 6.69 (td, 7.4, 0.9 Hz, 1H), 4.43 (s, 2H), 4.02 (s, 2H), 3.74 (s, 3H), 2.46 (s, 3H); <sup>13</sup>C NMR (100 MHz, CDCl<sub>3</sub>): δ 189.0, 157.2, 143.3, 138.6, 133.8, 130.7, 130.0, 129.3, 128.9, 128.4, 127.5, 126.9, 123.3, 120.1, 110.2, 55.1, 44.1, 31.2, 21.4. HRMS (EI) *m/z*: [M]<sup>+</sup> calcd. for C<sub>23</sub>H<sub>23</sub>NO<sub>3</sub>S<sub>2</sub>: 425.1119, found: 425.1111.

### 4-Methylbenzyl (*E*)-2-phenyl-*N*-tosylethanimidothioate (**3e**)

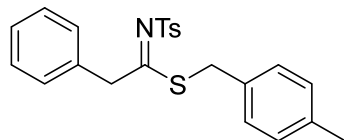

Following General Procedure I, using phenylacetylene (50.0 mg, 0.489 mmol), tosyl azide (116.0 mg, 0.587 mmol), and *p*-tolylmethanethiol (203.0 mg, 1.469 mmol). The product was purified by column chromatography (hexane/EtOAc, 5:1) to afford **3e** (163.0 mg, 81% yield) as a yellow solid. m.p. 72-73 °C; <sup>1</sup>H NMR (400 MHz, CDCl<sub>3</sub>): δ 7.85 (d, *J* = 8.3 Hz, 2H), 7.35-7.28 (m, 7H), 6.98 (d, *J* = 8.2 Hz, 2H), 6.95 (d, *J* = 8.2 Hz, 2H), 4.44 (s, 2H), 3.95 (s, 2H), 2.46 (s, 3H), 2.28 (s, 3H); <sup>13</sup>C NMR (100 MHz, CDCl<sub>3</sub>): δ 188.5, 143.4, 138.5, 137.2, 133.7, 132.0, 130.2, 129.3, 129.1, 128.9, 128.5, 127.6, 126.9, 44.1, 36.0, 21.5, 21.0. HRMS (EI) *m/z*: [M]<sup>+</sup> calcd. for C<sub>23</sub>H<sub>23</sub>NO<sub>2</sub>S<sub>2</sub>: 409.1170, found: 409.1180.

### Naphthalen-2-ylmethyl (*E*)-2-phenyl-*N*-tosylethanimidothioate (**3f**)

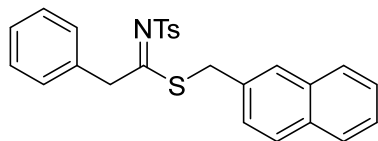

Following General Procedure I, using phenylacetylene (50.0 mg, 0.489 mmol), tosyl azide (116.0 mg, 0.587 mmol), and naphthalen-2-ylmethanethiol (256.0 mg, 1.469 mmol). The product was purified by column chromatography (hexane/EtOAc, 4:1) to afford **3f** (168.0 mg, 77% yield) as a white solid. m.p. 104-105 °C; <sup>1</sup>H NMR (400 MHz, CDCl<sub>3</sub>): δ 7.85 (d, *J* = 8.4 Hz, 2H), 7.77 (dd, *J* = 6.0, 3.3 Hz, 1H), 7.67 (d, *J* = 8.5 Hz, 1H), 7.58 (dd, *J* = 6.1, 3.5 Hz, 1H), 7.49 (d, *J* = 1.0 Hz, 1H), 7.46 (t, *J* = 3.5 Hz, 1H), 7.43 (t, *J* = 3.5 Hz, 1H), 7.34-7.27 (m, 7H), 7.19 (dd, *J* = 8.4, 1.8 Hz, 1H), 4.46 (s, 2H), 4.15 (s, 2H), 2.45 (s, 3H); <sup>13</sup>C NMR (100 MHz, CDCl<sub>3</sub>): δ 188.3, 143.5, 138.5, 133.7, 133.0, 132.7, 132.5, 130.2, 129.4, 128.6, 128.3, 127.9, 127.7, 127.6, 127.5, 127.0, 126.7, 126.1, 126.0, 44.2, 36.5, 21.5. HRMS (EI) *m/z*: [M]<sup>+</sup> calcd. for C<sub>26</sub>H<sub>23</sub>NO<sub>2</sub>S<sub>2</sub>: 445.1170, found: 445.1165.

### 4-Fluorobenzyl (*E*)-2-phenyl-*N*-tosylethanimidothioate (**3g**)

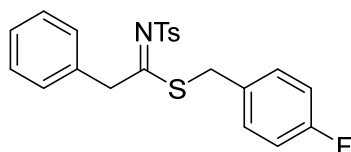

Following General Procedure I, using phenylacetylene (50.0 mg, 0.489 mmol), tosyl azide (116.0 mg, 0.587 mmol), and (4-fluorophenyl)methanethiol (209.0 mg, 1.469 mmol). The product was purified by column chromatography (hexane/EtOAc, 10:1) to afford **3g** (179.0 mg, 88% yield) as a white solid. m.p. 82-83 °C; <sup>1</sup>H NMR (400 MHz, CDCl<sub>3</sub>): δ 7.83 (d, *J* = 8.3 Hz, 2H), 7.36-7.29 (m, 7H), 7.01 (d, *J* = 5.3 Hz, 1H), 6.99 (d, *J* = 5.3 Hz, 1H), 6.83 (t, *J* = 8.7 Hz, 2H), 4.44 (s, 2H), 3.93 (s, 2H), 2.47 (s, 3H); <sup>13</sup>C NMR (100 MHz, CDCl<sub>3</sub>): δ 188.2, 161.9 (d, *J*<sub>C-F</sub> = 246.5 Hz), 143.6, 138.3, 133.6, 131.0 (d, *J*<sub>C-F</sub> = 2.9 Hz), 130.7 (d, *J*<sub>C-F</sub> = 8.1 Hz), 130.2, 129.4, 128.6, 127.8, 127.0, 115.4 (d, *J*<sub>C-F</sub> = 21.4 Hz), 44.1, 35.4, 21.5; <sup>19</sup>F NMR (376MHz, CDCl<sub>3</sub>): δ -115.9 (s, C-F). HRMS (EI) *m/z*: [M]<sup>+</sup> calcd. for C<sub>22</sub>H<sub>20</sub>FNO<sub>2</sub>S<sub>2</sub>: 413.0919, found: 413.0921.

### 4-Chlorobenzyl (*E*)-2-phenyl-*N*-tosylethanimidothioate (**3h**)

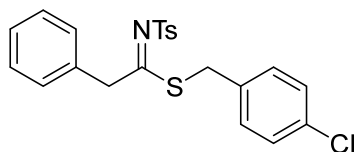



Following General Procedure I, using phenylacetylene (50.0 mg, 0.489 mmol), tosyl azide (116.0 mg, 0.587 mmol), and (4-chlorophenyl)methanethiol (233.0 mg, 1.469 mmol). The product was purified by column chromatography (hexane/EtOAc, 10:1) to afford **3h** (157.0 mg, 75% yield) as a white solid. m.p. 115-116 °C; <sup>1</sup>H NMR (400 MHz, CDCl<sub>3</sub>): δ 7.80 (d, *J* = 8.3 Hz, 2H), 7.35-7.28 (m, 7H), 7.10 (d, *J* = 8.4 Hz, 2H), 6.96 (d, *J* = 8.4 Hz, 2H), 4.43 (s, 2H), 3.92 (s, 2H), 2.47 (s, 3H); <sup>13</sup>C NMR (100 MHz, CDCl<sub>3</sub>): δ 188.0, 143.6, 138.3, 134.0, 133.6, 133.2, 130.2, 130.1, 129.4, 128.6, 128.5, 127.8, 127.0, 44.1, 35.4, 21.5. HRMS (EI) *m/z*: [M]<sup>+</sup> calcd. for C<sub>22</sub>H<sub>20</sub>ClNO<sub>2</sub>S<sub>2</sub>: 429.0624, found: 429.0626.

#### 4-Bromobenzyl (*E*)-2-phenyl-*N*-tosylethanimidothioate (**3i**)

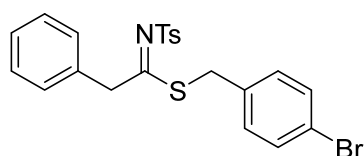

Following General Procedure I, using phenylacetylene (50.0 mg, 0.489 mmol), tosyl azide (116.0 mg, 0.587 mmol), and (4-bromophenyl)methanethiol (298.0 mg, 1.469 mmol). The product was purified by column chromatography (hexane/EtOAc, 5:1) to afford **3i** (173.0 mg, 75% yield) as a yellow solid. m.p. 126-127 °C; <sup>1</sup>H NMR (400 MHz, CDCl<sub>3</sub>): δ 7.79 (d, *J* = 8.2 Hz, 2H), 7.35-7.28 (m, 7H), 7.25 (d, *J* = 8.6 Hz, 2H), 6.90 (d, *J* = 8.3 Hz, 2H), 4.43 (s, 2H), 3.89 (s, 2H), 2.47 (s, 3H); <sup>13</sup>C NMR (100 MHz, CDCl<sub>3</sub>): δ 187.8, 143.6, 138.2, 134.5, 133.5, 131.3, 130.5, 130.1, 129.4, 128.5, 127.7, 126.9, 121.2, 44.0, 35.3, 21.5. HRMS (EI) *m/z*: [M]<sup>+</sup> calcd. for C<sub>22</sub>H<sub>20</sub>BrNO<sub>2</sub>S<sub>2</sub>: 473.0119, found: 473.0114.

#### 4-Nitrobenzyl (*E*)-2-phenyl-*N*-tosylethanimidothioate (**3j**)

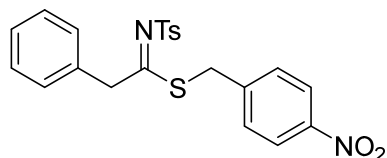

Following General Procedure I, using phenylacetylene (50.0 mg, 0.489 mmol), tosyl azide (116.0 mg, 0.587 mmol), and (4-nitrophenyl)methanethiol (249.0 mg, 1.469 mmol). The product was purified by column chromatography (hexane/DCM, 1:1) to afford **3j** (143.0 mg, 66% yield) as a white solid. m.p. 138-140 °C; <sup>1</sup>H NMR (400 MHz, CDCl<sub>3</sub>): δ 7.92 (d, *J* = 8.7 Hz, 2H), 7.75 (d, *J* = 8.3 Hz, 2H), 7.36-7.28 (m, 7H), 7.14 (d, *J* = 8.7 Hz, 2H), 4.44 (s, 2H), 3.99 (s, 2H), 2.48 (s, 3H); <sup>13</sup>C NMR (100 MHz, CDCl<sub>3</sub>): δ 187.1, 146.8, 144.0, 143.4, 138.0, 133.3, 130.2, 129.6, 129.5, 128.6, 127.9, 127.0, 123.4, 44.0, 35.1, 21.5. HRMS (EI) *m/z*: [M]<sup>+</sup> calcd. for C<sub>22</sub>H<sub>20</sub>N<sub>2</sub>O<sub>4</sub>S<sub>2</sub>: 440.0864, found: 440.0869.

### 1-Phenylethyl (*E*)-2-phenyl-*N*-tosylethanimidothioate (**3k**)

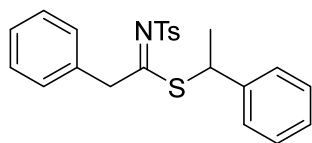

Following General Procedure I, using phenylacetylene (50.0 mg, 0.489 mmol), tosyl azide (116.0 mg, 0.587 mmol), and 1-phenylethane-1-thiol (203.0 mg, 1.469 mmol). The product was purified by column chromatography (hexane/EtOAc, 5:1) to afford **3k** (152.0 mg, 76% yield) as a white solid. m.p. 99-101 °C; <sup>1</sup>H NMR (400 MHz, CDCl<sub>3</sub>): δ 7.78 (d, *J* = 8.2 Hz, 2H), 7.34-7.26 (m, 7H), 7.14-7.21 (m, 3H), 7.07 (dd, *J* = 7.5, 1.8 Hz, 2H), 4.56 (q, *J* = 7.2 Hz, 1H), 4.46 (d, *J* = 16.3 Hz, 1H), 4.32 (d, *J* = 16.3 Hz, 1H), 2.47 (s, 3H), 1.49 (d, *J* = 7.2 Hz, 3H); <sup>13</sup>C NMR (100 MHz, CDCl<sub>3</sub>): δ 188.0, 143.4, 141.2, 138.4, 133.7, 130.1, 129.3, 128.5, 128.3, 127.5, 127.3, 126.9, 45.2, 44.1, 21.5, 21.0. HRMS (EI) *m/z*: [M]<sup>+</sup> calcd. for C<sub>23</sub>H<sub>23</sub>NO<sub>2</sub>S<sub>2</sub>: 409.1170, found: 409.1176.

### Benzhydryl (*E*)-2-phenyl-*N*-tosylethanimidothioate (**3l**)

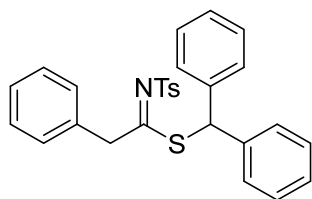

Following General Procedure I, using phenylacetylene (50.0 mg, 0.489 mmol), tosyl azide (116.0 mg, 0.587 mmol), and diphenylmethanethiol (292.0 mg, 1.469 mmol). The product was purified by column chromatography (hexane/EtOAc, 5:1) to afford **3l** (176.0 mg, 76% yield) as a white solid. m.p. 130-132 °C; <sup>1</sup>H NMR (400 MHz, CDCl<sub>3</sub>): δ 7.52 (d, *J* = 8.3 Hz, 2H), 7.36-7.30 (m, 5H), 7.24-7.18 (m, 8H), 7.16-7.12 (m, 4H), 5.75 (s, 1H), 4.45 (s, 2H), 2.45 (s, 3H), 2.47 (s, 3H); <sup>13</sup>C NMR (100 MHz, CDCl<sub>3</sub>): δ 187.1, 143.1, 139.0, 138.2, 133.6, 130.1, 129.1, 128.6, 128.4, 128.3, 127.7, 127.3, 126.8, 54.5, 44.1, 21.5. HRMS (EI) *m/z*: [M]<sup>+</sup> calcd. for C<sub>28</sub>H<sub>25</sub>NO<sub>2</sub>S<sub>2</sub>: 471.1327, found: 471.1323.

### 3-Phenylpropyl (*E*)-2-phenyl-*N*-tosylethanimidothioate (**3m**)

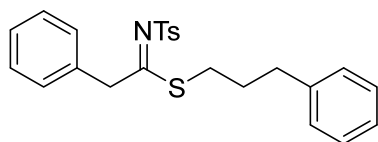

Following General Procedure I, using phenylacetylene (50.0 mg, 0.489 mmol), tosyl azide (116.0 mg, 0.587 mmol), and 3-phenylpropane-1-thiol (224.0 mg, 1.469 mmol). The product was purified by column chromatography (hexane/EtOAc, 10:1) to afford **3m** (157.0 mg, 76% yield) as a yellow oil; <sup>1</sup>H NMR (400 MHz, CDCl<sub>3</sub>): δ 7.83 (d, *J* =

8.2 Hz, 2H), 7.36-7.28 (m, 7H), 7.25-7.14 (m, 3H), 7.0 (d,  $J = 7.2$  Hz, 2H), 4.44 (s, 2H), 2.78 (t,  $J = 7.4$  Hz, 2H), 2.51 (t,  $J = 7.6$  Hz, 2H), 2.44 (s, 3H), 1.79 (p,  $J = 6.2$  Hz, 2H);  $^{13}\text{C}$  NMR (100 MHz,  $\text{CDCl}_3$ ):  $\delta$  188.8, 143.3, 140.5, 138.5, 133.9, 130.0, 129.3, 128.4, 128.2, 128.1, 127.5, 126.7, 125.9, 44.2, 34.7, 31.0, 29.3, 21.4. HRMS (EI)  $m/z$ :  $[\text{M}]^+$  calcd. for  $\text{C}_{24}\text{H}_{25}\text{NO}_2\text{S}_2$ : 423.1327, found: 423.1337.

### Dodecyl (*E*)-2-phenyl-*N*-tosylethanimidothioate (**3n**)

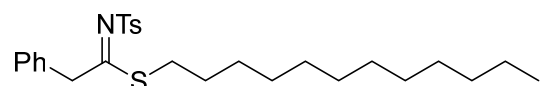

Following General Procedure I, using phenylacetylene (50.0 mg, 0.489 mmol), tosyl azide (116.0 mg, 0.587 mmol), and 12-phenyldodecane-1-thiol (297.0 mg, 1.469 mmol). The product was purified by column chromatography (hexane/EtOAc, 15:1) to afford **3m** (103.0 mg, 51% yield) as a colorless oil;  $^1\text{H}$  NMR (400 MHz,  $\text{CDCl}_3$ ):  $\delta$  7.84 (d,  $J = 8.3$  Hz, 2H), 7.36-7.28 (m, 7H), 4.43 (s, 2H), 2.75 (t,  $J = 7.4$  Hz, 2H), 2.44 (s, 3H), 1.45 (p,  $J = 7.1$  Hz, 2H), 1.30-1.10 (m, 18H), 0.88 (t,  $J = 6.9$  Hz, 3H);  $^{13}\text{C}$  NMR (100 MHz,  $\text{CDCl}_3$ ):  $\delta$  189.1, 143.2, 138.8, 134.1, 130.1, 129.3, 128.5, 127.5, 126.8, 44.4, 31.8, 31.7, 29.5, 29.4, 29.3, 29.2, 29.0, 28.8, 27.8, 22.6, 21.5, 14.0. HRMS (EI)  $m/z$ :  $[\text{M}]^+$  calcd. for  $\text{C}_{27}\text{H}_{39}\text{NO}_2\text{S}_2$ : 473.2422, found: 473.2425.

### Methyl (*E*)-*N*-(*tert*-butoxycarbonyl)-*S*-(2-phenyl-1-(tosylimino)ethyl)-*D*-cysteinate (**3o**)

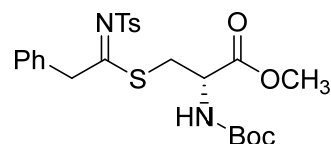

Following General Procedure I, using phenylacetylene (50.0 mg, 0.489 mmol), tosyl azide (116.0 mg, 0.587 mmol), and methyl (*tert*-butoxycarbonyl)-*D*-cysteinate (346.0 mg, 1.469 mmol). The product was purified by column chromatography (hexane/EtOAc, 2:1) to afford **3o** (186.0 mg, 75% yield) as a white solid. m.p. 81-83  $^{\circ}\text{C}$ ;  $^1\text{H}$  NMR (400 MHz,  $\text{CDCl}_3$ ):  $\delta$  7.87 (d,  $J = 8.3$  Hz, 2H), 7.36-7.30 (m, 7H), 5.08 (d,  $J = 7.5$  Hz, 1H), 4.46-4.37 (m, 3H), 3.62 (s, 3H), 3.30 (dd,  $J = 13.5, 4.9$  Hz, 1H), 3.16 (dd,  $J = 13.5, 7.5$  Hz, 1H), 2.45 (s, 3H), 1.40 (s, 9H);  $^{13}\text{C}$  NMR (100 MHz,  $\text{CDCl}_3$ ):  $\delta$  187.9, 170.5, 154.8, 143.5, 138.0, 133.4, 133.0, 129.3, 128.5, 127.6, 126.9, 80.1, 52.5, 52.0, 44.1, 33.4, 28.0, 21.4. HRMS (EI)  $m/z$ :  $[\text{M}]^+$  calcd. for  $\text{C}_{24}\text{H}_{30}\text{N}_2\text{O}_6\text{S}_2$ : 506.1545, found: 506.1548.

#### 4-Methylbenzyl (*E*)-2-(*p*-tolyl)-*N*-tosylethanimidothioate (**4b**)

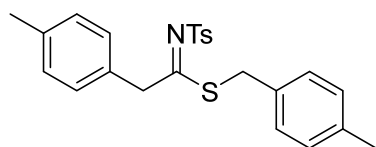

Following General Procedure I, using 1-ethynyl-4-methylbenzene (50.0 mg, 0.430 mmol), tosyl azide (103.0 mg, 0.516 mmol), and *p*-tolylmethanethiol (178.0 mg, 1.29 mmol). The product was purified by column chromatography (hexane/EtOAc, 5:1) to afford **4b** (115.0 mg, 63% yield) as a yellow solid. m.p. 75-76 °C; <sup>1</sup>H NMR (400 MHz, CDCl<sub>3</sub>): δ 7.85 (d, *J* = 8.0 Hz, 2H), 7.33 (d, *J* = 8.0 Hz, 2H), 7.19 (d, *J* = 7.9 Hz, 2H), 7.12 (d, *J* = 7.9 Hz, 2H), 6.98 (d, *J* = 8.3 Hz, 2H), 6.95 (d, *J* = 8.2 Hz, 2H), 4.40 (s, 2H), 3.94 (s, 2H), 2.46 (s, 3H), 2.33 (s, 3H), 2.28 (s, 3H); <sup>13</sup>C NMR (100 MHz, CDCl<sub>3</sub>): δ 189.1, 143.3, 138.6, 137.4, 137.1, 132.0, 130.5, 130.1, 129.3, 129.2, 129.1, 128.9, 126.9, 43.8, 36.0, 21.5, 21.1, 21.0. HRMS (EI) *m/z*: [M]<sup>+</sup> calcd. for C<sub>24</sub>H<sub>25</sub>NO<sub>2</sub>S<sub>2</sub>: 423.1327, found: 423.1320.

#### 4-Methylbenzyl (*E*)-2-(4-methoxyphenyl)-*N*-tosylethanimidothioate (**4c**)

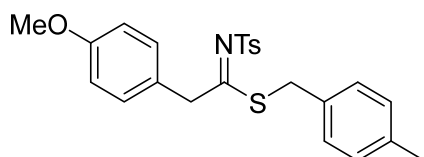

Following General Procedure I, using 1-ethynyl-4-methoxybenzene (50.0 mg, 0.378 mmol), tosyl azide (90.0 mg, 0.454 mmol), and *p*-tolylmethanethiol (157.0 mg, 1.136 mmol). The product was purified by column chromatography (hexane/EtOAc, 5:1) to afford **4c** (103.0 mg, 62% yield) as a yellow solid. m.p. 99-100 °C; <sup>1</sup>H NMR (400 MHz, CDCl<sub>3</sub>): δ 7.85 (d, *J* = 8.3 Hz, 2H), 7.33 (d, *J* = 8.2 Hz, 2H), 7.22 (d, *J* = 8.6 Hz, 2H), 6.99 (d, *J* = 8.3 Hz, 2H), 6.96 (d, *J* = 8.3 Hz, 2H), 6.84 (d, *J* = 8.6 Hz, 2H), 4.37 (s, 2H), 3.94 (s, 2H), 3.79 (s, 3H), 2.46 (s, 3H), 2.28 (s, 3H); <sup>13</sup>C NMR (100 MHz, CDCl<sub>3</sub>): δ 189.4, 159.1, 143.3, 138.5, 137.1, 132.0, 131.3, 129.3, 129.0, 128.8, 126.9, 125.5, 113.8, 55.0, 43.3, 36.0, 21.4, 21.0. HRMS (EI) *m/z*: [M]<sup>+</sup> calcd. for C<sub>24</sub>H<sub>25</sub>NO<sub>3</sub>S<sub>2</sub>: 439.1276, found: 439.1266.

#### 4-Methylbenzyl (*E*)-2-(naphthalen-2-yl)-*N*-tosylethanimidothioate (**4d**)

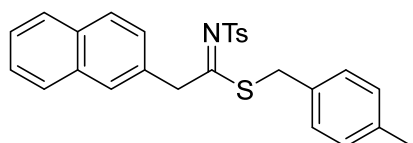

Following General Procedure I, using 2-ethynynaphthalene (50.0 mg, 0.329 mmol), tosyl azide (79.0 mg, 0.394 mmol), and *p*-tolylmethanethiol (172.0 mg, 0.986 mmol). The product was purified by column chromatography (hexane/EtOAc, 5:1) to afford **4d** (100.0 mg, 66% yield) as a white solid. m.p. 143-144 °C; <sup>1</sup>H NMR (400 MHz, CDCl<sub>3</sub>): δ 7.85 (d, *J* = 8.3 Hz, 2H), 7.83-7.75 (m, 3H), 7.73 (s, 1H), 7.50-7.44 (m, 2H), 7.41 (dd, *J* = 8.4, 1.8 Hz, 1H), 7.31 (d, *J* = 8.0 Hz, 2H), 7.01-6.92 (m, 4H), 4.60 (s, 2H), 3.97 (s, 2H), 2.45 (s, 3H), 2.27 (s, 3H); <sup>13</sup>C NMR (100 MHz, CDCl<sub>3</sub>): δ 188.5, 143.5, 138.5, 137.2, 133.2, 132.6, 132.0, 131.1, 129.4, 129.3, 129.1, 128.9, 128.2, 127.9, 127.8, 127.6, 127.0, 126.2, 126.1, 44.2, 36.1, 21.5, 21.1. HRMS (EI) *m/z*: [M]<sup>+</sup> calcd. for C<sub>27</sub>H<sub>25</sub>NO<sub>2</sub>S<sub>2</sub>: 459.1327, found: 459.1331.

#### 4-Methylbenzyl (*E*)-2-(4-acetylphenyl)-*N*-tosylethanimidothioate (**4e**)

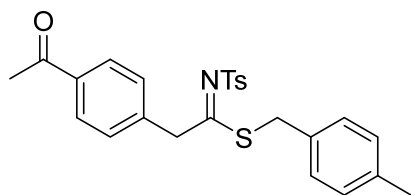

Following General Procedure I, using 1-(4-ethynylphenyl)ethan-1-one (50.0 mg, 0.347 mmol), tosyl azide (82.0 mg, 0.416 mmol), and *p*-tolylmethanethiol (173.0 mg 1.040 mmol). The product was purified by column chromatography (hexane/EtOAc, 5:1) to afford **4e** (122.0 mg, 78% yield) as a yellow solid. m.p. 122-123 °C; <sup>1</sup>H NMR (400 MHz, CDCl<sub>3</sub>): δ 7.91 (d, *J* = 8.2 Hz, 2H), 7.84 (d, *J* = 8.3 Hz, 2H), 7.43 (d, *J* = 8.1 Hz, 2H), 7.33 (d, *J* = 8.2 Hz, 2H), 6.99 (d, *J* = 8.0 Hz, 2H), 6.95 (d, *J* = 8.2 Hz, 2H), 4.49 (s, 2H), 3.97 (s, 2H), 2.59 (s, 3H), 2.46 (s, 3H), 2.29 (s, 3H); <sup>13</sup>C NMR (100 MHz, CDCl<sub>3</sub>): δ 197.4, 186.5, 143.6, 139.1, 138.2, 137.3, 136.3, 131.7, 130.2, 129.4, 129.1, 128.8, 128.5, 126.9, 43.8, 36.0, 26.5, 21.5, 21.0. HRMS (EI) *m/z*: [M]<sup>+</sup> calcd. for C<sub>27</sub>H<sub>25</sub>NO<sub>2</sub>S<sub>2</sub>: 451.1276, found: 451.1277.

#### 4-Methylbenzyl (*E*)-2-(4-nitrophenyl)-*N*-tosylethanimidothioate (**4f**)

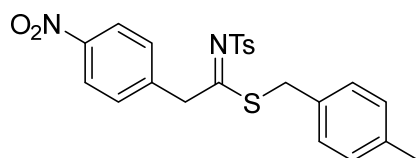

Following General Procedure I, using 1-ethynyl-4-nitrobenzene (50.0 mg, 0.340 mmol), tosyl azide (80.0 mg, 0.408 mmol), and *p*-tolylmethanethiol (141.0 mg 1.040 mmol). The product was purified by column chromatography (hexane/EtOAc, 5:1) to afford **4f** (112.0 mg, 73% yield) as a yellow solid. m.p. 122-123 °C; <sup>1</sup>H NMR (400 MHz, CDCl<sub>3</sub>): δ 8.17 (d, *J* = 7.9 Hz, 2H), 7.83 (d, *J* = 7.8 Hz, 2H), 7.51 (d, *J* = 8.7 Hz, 2H), 7.34 (d,

$J = 8.0$  Hz, 2H), 7.00 (d,  $J = 8.0$  Hz, 2H), 6.95 (d,  $J = 8.0$  Hz, 2H), 4.53 (s, 2H), 3.93 (s, 2H), 2.47 (s, 3H), 2.29 (s, 3H);  $^{13}\text{C}$  NMR (100 MHz,  $\text{CDCl}_3$ ):  $\delta$  185.0, 147.3, 143.8, 141.3, 138.0, 137.4, 131.5, 130.8, 129.4, 129.2, 128.8, 127.0, 123.7, 43.5, 36.1, 21.5, 21.0. HRMS (EI)  $m/z$ :  $[\text{M}]^+$  calcd. for  $\text{C}_{23}\text{H}_{22}\text{N}_2\text{O}_4\text{S}_2$ : 454.1021, found: 454.1025.

#### 4-Methylbenzyl (*E*)-*N*-tosylhexanimidothioate (**4g**)

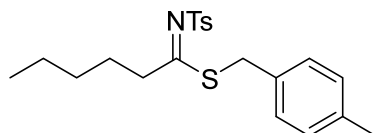

Following General Procedure I, using hex-1-yne (50.0 mg, 0.687 mmol), tosyl azide (146.0 mg, 0.730 mmol), and *p*-tolylmethanethiol (252.0 mg 1.826 mmol). The product was purified by column chromatography (hexane/EtOAc, 10:1) to afford **4g** (79.0 mg, 37% yield) as a light pink oil;  $^1\text{H}$  NMR (400 MHz,  $\text{CDCl}_3$ ):  $\delta$  7.83 (d,  $J = 8.3$  Hz, 2H), 7.32 (d,  $J = 8.4$  Hz, 2H), 7.01 (s, 4H), 4.00 (s, 2H), 3.05-2.97 (m, 2H), 2.45 (s, 3H), 2.30 (s, 3H), 1.78 (p,  $J = 7.7$  Hz, 2H), 1.41-1.30 (m, 4H), 0.89 (t,  $J = 7.0$  Hz, 3H);  $^{13}\text{C}$  NMR (100 MHz,  $\text{CDCl}_3$ ):  $\delta$  190.2, 143.2, 138.7, 137.2, 132.3, 129.3, 129.2, 128.8, 126.9, 38.8, 35.5, 31.4, 28.1, 22.1, 21.5, 21.0, 13.8. HRMS (EI)  $m/z$ :  $[\text{M}]^+$  calcd. for  $\text{C}_{21}\text{H}_{27}\text{NO}_2\text{S}_2$ : 389.1483, found: 389.1477.

#### 4-Fluorobenzyl (*E*)-2-(*p*-tolyl)-*N*-tosylethanimidothioate (**4h**)

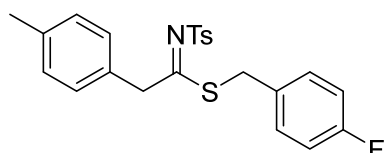

Following General Procedure I, using 1-ethynyl-4-methylbenzene (50.0 mg, 0.430 mmol), tosyl azide (102.0 mg, 0.517 mmol), and (4-fluorophenyl)methanethiol (184.0 mg, 1.291 mmol). The product was purified by column chromatography (hexane/EtOAc, 5:1) to afford **4h** (117.0 mg, 64% yield) as a yellow solid. m.p. 130-131 °C;  $^1\text{H}$  NMR (400 MHz,  $\text{CDCl}_3$ ):  $\delta$  7.83 (d,  $J = 8.2$  Hz, 2H), 7.33 (d,  $J = 8.1$  Hz, 2H), 7.19 (d,  $J = 8.0$  Hz, 2H), 7.13 (d,  $J = 7.9$  Hz, 2H), 7.02 (d,  $J = 5.6$  Hz, 1H), 7.00 (d,  $J = 5.4$  Hz, 1H), 6.84 (d,  $J = 8.6$  Hz, 1H), 6.81 (d,  $J = 8.6$  Hz, 1H), 4.40 (s, 2H), 3.93 (s, 2H), 2.46 (s, 3H), 2.34 (s, 3H);  $^{13}\text{C}$  NMR (100 MHz,  $\text{CDCl}_3$ ):  $\delta$  188.6, 161.9 (d,  $J_{\text{C-F}} = 246.4$  Hz), 143.5, 138.4, 137.5, 131.1 (d,  $J_{\text{C-F}} = 2.8$  Hz), 130.6 (d,  $J_{\text{C-F}} = 8.1$  Hz), 130.4, 130.0, 129.3, 129.2, 126.9, 115.2 (d,  $J_{\text{C-F}} = 21.4$  Hz), 43.7, 35.3, 21.4, 21.0;  $^{19}\text{F}$  NMR (376MHz,  $\text{CDCl}_3$ ):  $\delta$  -116.0 (s, C-F). HRMS (EI)  $m/z$ :  $[\text{M}]^+$  calcd. for  $\text{C}_{23}\text{H}_{22}\text{FNO}_2\text{S}_2$ : 427.1076, found: 427.1078.

#### 4-Fluorobenzyl (*E*)-2-(4-methoxyphenyl)-*N*-tosylethanimidothioate (**4i**)

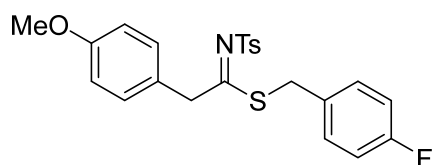

Following General Procedure I, using 1-ethynyl-4-methoxybenzene (50.0 mg, 0.378 mmol), tosyl azide (90.0 mg, 0.454 mmol), and (4-fluorophenyl)methanethiol (161.0 mg, 1.135 mmol). The product was purified by column chromatography (hexane/EtOAc, 5:1) to afford **4i** (109.0 mg, 65% yield) as a yellow solid. m.p. 102-103 °C; <sup>1</sup>H NMR (400 MHz, CDCl<sub>3</sub>): δ 7.83 (d, *J* = 6.6 Hz, 2H), 7.34 (d, *J* = 8.0 Hz, 2H), 7.22 (d, *J* = 8.7 Hz, 2H), 7.01 (d, *J* = 5.3 Hz, 1H), 6.99 (d, *J* = 5.3 Hz, 1H), 6.88-6.80 (m, 4H), 4.37 (s, 2H), 3.92 (s, 2H), 3.80 (s, 3H), 2.46 (s, 3H); <sup>13</sup>C NMR (100 MHz, CDCl<sub>3</sub>): δ 189.1, 161.9 (d, *J*<sub>C-F</sub> = 246.4 Hz), 159.2, 143.6, 138.4, 131.4, 131.1, 130.6 (d, *J*<sub>C-F</sub> = 8.0 Hz), 129.4, 127.0, 125.4, 115.2 (d, *J*<sub>C-F</sub> = 21.4 Hz), 113.9, 55.1, 43.3, 35.4, 21.5; <sup>19</sup>F NMR (376MHz, CDCl<sub>3</sub>): δ -116.0 (s, C-F). HRMS (EI) *m/z*: [M]<sup>+</sup> calcd. for C<sub>23</sub>H<sub>22</sub>FNO<sub>3</sub>S<sub>2</sub>: 443.1025, found: 443.1020.

#### 4-Fluorobenzyl (*E*)-2-(naphthalen-2-yl)-*N*-tosylethanimidothioate (**4j**)

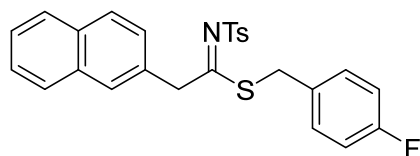

Following General Procedure I, using 2-ethynyl-naphthalene (50.0 mg, 0.329 mmol), tosyl azide (78.0 mg, 0.394 mmol), and (4-fluorophenyl)methanethiol (140.0 mg, 0.986 mmol). The product was purified by column chromatography (hexane/EtOAc, 5:1) to afford **4j** (106.0 mg, 70% yield) as a white solid. m.p. 121-122 °C; <sup>1</sup>H NMR (400 MHz, CDCl<sub>3</sub>): δ 7.86-7.75 (m, 5H), 7.73 (s, 1H), 7.51-7.45 (m, 2H), 7.40 (dd, *J* = 8.4, 1.5 Hz, 1H), 7.32 (d, *J* = 8.3, 2H), 7.01 (d, *J* = 5.4 Hz, 1H), 6.99 (d, *J* = 5.4 Hz, 1H), 6.82 (t, *J* = 8.6, 2H), 4.60 (s, 2H), 3.94 (s, 2H), 2.45 (s, 3H); <sup>13</sup>C NMR (100 MHz, CDCl<sub>3</sub>): δ 188.1, 163.2 (d, *J*<sub>C-F</sub> = 245.0 Hz), 143.6, 138.2, 130.6 (d, *J*<sub>C-F</sub> = 8.1 Hz), 129.4, 128.2, 127.8, 127.7, 127.6, 127.0, 126.2, 126.1, 115.2 (d, *J*<sub>C-F</sub> = 21.4 Hz), 44.2, 35.4, 21.5; <sup>19</sup>F NMR (376MHz, CDCl<sub>3</sub>): δ -115.9 (s, C-F). HRMS (EI) *m/z*: [M]<sup>+</sup> calcd. for C<sub>26</sub>H<sub>22</sub>FNO<sub>2</sub>S<sub>2</sub>: 463.1076, found: 463.1071.

#### 4-Fluorobenzyl (*E*)-2-(4-acetylphenyl)-*N*-tosylethanimidothioate (**4k**)

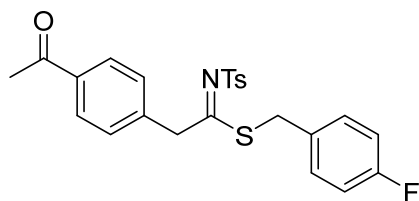

Following General Procedure I, using 1-(4-ethynylphenyl)ethan-1-one (50.0 mg, 0.347 mmol), tosyl azide (82.0 mg, 0.416 mmol), and (4-fluorophenyl)methanethiol (148.0 mg, 1.040 mmol). The product was purified by column chromatography (hexane/EtOAc, 5:1) to afford **4k** (120.0 mg, 76% yield) as a yellow solid. m.p. 118-119 °C; <sup>1</sup>H NMR (400 MHz, CDCl<sub>3</sub>): δ 7.92 (d, *J* = 8.3 Hz, 2H), 7.82 (d, *J* = 8.3 Hz, 2H), 7.42 (d, *J* = 8.3 Hz, 2H), 7.34 (d, *J* = 8.0 Hz, 2H), 7.01 (d, *J* = 5.3 Hz, 1H), 6.99 (d, *J* = 5.3 Hz, 1H), 6.83 (t, *J* = 8.6 Hz, 2H), 4.49 (s, 2H), 3.95 (s, 2H), 2.60 (s, 3H), 2.47 (s, 3H); <sup>13</sup>C NMR (100 MHz, CDCl<sub>3</sub>): δ 197.3, 186.0, 161.8 (d, *J*<sub>C-F</sub> = 245.3 Hz), 143.7, 138.9, 138.0, 136.2, 130.8 (d, *J*<sub>C-F</sub> = 2.8 Hz), 130.5 (d, *J*<sub>C-F</sub> = 8.1 Hz), 130.1, 129.3, 128.4, 126.8, 126.1, 115.2 (d, *J*<sub>C-F</sub> = 21.4 Hz), 43.7, 35.2, 26.4, 21.4; <sup>19</sup>F NMR (376MHz, CDCl<sub>3</sub>): δ -115.7 (s, C-F). HRMS (EI) *m/z*: [M]<sup>+</sup> calcd. for C<sub>24</sub>H<sub>22</sub>FNO<sub>3</sub>S<sub>2</sub>: 455.1025, found: 455.1024.

#### 4-Fluorobenzyl (*E*)-2-(4-nitrophenyl)-*N*-tosylethanimidothioate (**4l**)

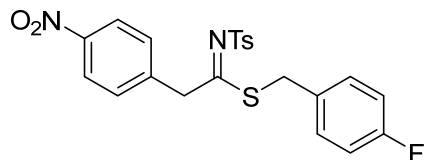

Following General Procedure I, using 1-ethynyl-4-nitrobenzene (50.0 mg, 0.340 mmol), tosyl azide (80.0 mg, 0.408 mmol), and (4-fluorophenyl)methanethiol (145.0 mg, 1.019 mmol). The product was purified by column chromatography (hexane/EtOAc, 5:1) to afford **4l** (113.7 mg, 73% yield) as a yellow solid. m.p. 134-135 °C; <sup>1</sup>H NMR (400 MHz, CDCl<sub>3</sub>): δ 8.19 (d, *J* = 8.7 Hz, 2H), 7.81 (d, *J* = 8.3 Hz, 2H), 7.52 (d, *J* = 8.6 Hz, 2H), 7.35 (d, *J* = 8.1 Hz, 2H), 7.02 (d, *J* = 5.4 Hz, 1H), 7.00 (d, *J* = 5.3 Hz, 1H), 6.86 (d, *J* = 8.6 Hz, 1H), 6.83 (d, *J* = 8.6 Hz, 1H), 4.53 (s, 2H), 3.98 (s, 2H), 2.47 (s, 3H); <sup>13</sup>C NMR (100 MHz, CDCl<sub>3</sub>): δ 184.6, 162.0 (d, *J*<sub>C-F</sub> = 246.9 Hz), 147.3, 144.0, 141.2, 137.8, 130.8, 130.6, 130.5, 129.5, 127.0, 123.7, 115.3 (d, *J*<sub>C-F</sub> = 21.5 Hz), 43.5, 35.4, 21.5; <sup>19</sup>F NMR (376MHz, CDCl<sub>3</sub>): δ -114.5 (s, C-F). HRMS (EI) *m/z*: [M]<sup>+</sup> calcd. for C<sub>22</sub>H<sub>19</sub>FN<sub>2</sub>O<sub>4</sub>S<sub>2</sub>: 458.0770, found: 458.0778.



#### 4-Fluorobenzyl (*E*)-*N*-tosylhexanimidothioate (**4m**)

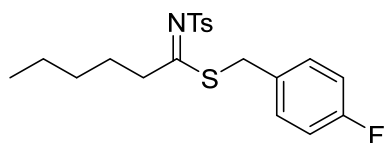

Following General Procedure I, using hex-1-yne (50.0 mg, 0.609 mmol), tosyl azide (144.0 mg, 0.731 mmol), and (4-fluorophenyl)methanethiol (260.0 mg, 1.826 mmol). The product was purified by column chromatography (hexane/EtOAc, 5:1) to afford **4m** (74.0 mg, 31% yield) as a pink solid. m.p. 44-45 °C; <sup>1</sup>H NMR (400 MHz, CDCl<sub>3</sub>): δ 7.81 (d, *J* = 8.2 Hz, 2H), 7.32 (d, *J* = 8.5 Hz, 2H), 7.07 (d, *J* = 5.3 Hz, 1H), 7.05 (d, *J* = 5.3 Hz, 1H), 6.87 (d, *J* = 8.5 Hz, 1H), 6.83 (d, *J* = 8.5 Hz, 1H), 3.99 (s, 2H), 3.11-2.96 (m, 2H), 2.45 (s, 3H), 1.78 (p, 7.28 Hz, 2H), 1.43-1.30 (m, 4H), 0.90 (t, *J* = 6.9 Hz, 3H); <sup>13</sup>C NMR (100 MHz, CDCl<sub>3</sub>): δ 189.8, 162.0 (d, *J*<sub>C-F</sub> = 246.3 Hz), 143.4, 138.6, 131.4 (d, *J*<sub>C-F</sub> = 3.0 Hz), 130.5 (d, *J*<sub>C-F</sub> = 8.1 Hz), 129.4, 126.9, 115.3 (d, *J*<sub>C-F</sub> = 21.5 Hz), 38.8, 34.8, 31.5, 28.1, 22.1, 21.5, 13.8; <sup>19</sup>F NMR (376MHz, CDCl<sub>3</sub>): δ -116.0 (s, C-F). HRMS (EI) *m/z*: [*M*]<sup>+</sup> calcd. for C<sub>20</sub>H<sub>24</sub>FNO<sub>2</sub>S<sub>2</sub>: 393.1232, found: 393.1228.

#### 4-Methylbenzyl (*E*)-3,3-dimethyl-*N*-tosylbutanimidothioate (**4n**)

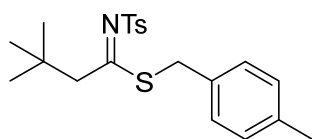

Following General Procedure I, using 3,3-dimethylbut-1-yne (50.0 mg, 0.6087 mmol), tosyl azide (144.0 mg, 0.730 mmol), and *p*-tolylmethanethiol (252.0 mg 1.826 mmol). The product was purified by column chromatography (hexane/EtOAc, 5:1) to afford **4n** (51.0 mg, 21% yield) as a white solid. m.p. 80-81 °C; <sup>1</sup>H NMR (400 MHz, CDCl<sub>3</sub>): δ 7.83 (d, *J* = 8.3 Hz, 2H), 7.30 (d, *J* = 8.4 Hz, 2H), 6.99 (s, 4H), 4.04 (s, 2H), 3.09 (s, 2H), 2.44 (s, 3H), 2.30 (s, 3H), 1.13 (s, 9H); <sup>13</sup>C NMR (100 MHz, CDCl<sub>3</sub>): δ 187.1, 143.2, 138.9, 137.1, 132.4, 129.3, 129.2, 128.8, 127.0, 50.1, 36.0, 32.4, 30.3, 21.5, 21.1. HRMS (EI) *m/z*: [*M*]<sup>+</sup> calcd. for C<sub>21</sub>H<sub>27</sub>NO<sub>2</sub>S<sub>2</sub>: 389.1483, found: 389.1490.

#### (2*R*,3*R*,4*S*,5*S*,6*S*)-2-(acetoxymethyl)-6-(((*Z*)-2-phenyl-1-(tosylimino)ethyl)thio)tetrahydro-2*H*-pyran-3,4,5-triyl triacetate (**3p**)

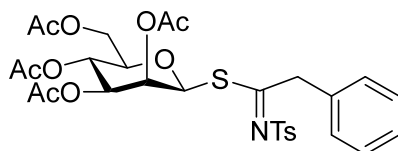

Following General Procedure II. To a solution of terminal alkyne **1a** (19.0 mg, 0.19 mmol, 1.0 equiv) in DCM (0.3 M) was added *p*-toluenesulfonyl azide (45.0 mg, 0.23 mmol, 1.2 equiv), DMAP (23.0 mg, 19 mmol, 1.0 equiv) and CuI (7.0 mg, 0.038 mmol,

0.2 equiv). The resulting solution was stirred at room temperature under nitrogen atmosphere for 1 hour. Then fresh prepared  $\beta$ -mannosyl 1-thiol **2p** (103.0 mg, 0.285 mmol, 1.5 equiv) were added to the reaction mixture and the reaction was stirred for 0.5 h. The mixture was extracted with DCM for three times and the combined organic phase was washed with brine, dried over MgSO<sub>4</sub>, filtered and concentrated. The crude products were purified by flash column chromatography (hexane/EtOAc, 3:2) to afford the desired product **3p** (72 mg, 60% yield) as a colorless oil.  $[\alpha]_D^{29}$  -18.3 (c = 0.1, CHCl<sub>3</sub>); <sup>1</sup>H NMR (400 MHz, CDCl<sub>3</sub>)  $\delta$  7.84 (d, *J* = 8.2 Hz, 2H), 7.33 (d, *J* = 8.2 Hz, 2H), 7.30 – 7.22 (m, TsNCH<sub>2</sub>Ph, 5H), 5.33 (d, *J* = 2.8 Hz, H<sub>2</sub>, 1H), 5.27 (s, H<sub>1</sub>, 1H), 5.12 (t, *J* = 10.0 Hz, H<sub>4</sub>, 1H), 4.92 (dd, *J* = 10.0, 3.4 Hz, H<sub>3</sub>, 1H), 4.47 (d, *J* = 16.3 Hz, TsNCH<sub>2</sub>Ph, 1H), 4.30 (d, *J* = 16.3 Hz, TsNCH<sub>2</sub>Ph, 1H), 4.11 (dd, *J* = 12.5, 5.4 Hz, H<sub>6</sub>, 1H), 3.82 (dd, *J* = 12.5, 1.9 Hz, H<sub>6</sub>, 1H), 3.43 (ddd, *J* = 10.0, 5.4, 1.9 Hz, H<sub>5</sub>, 1H), 2.43 (s, 3H), 2.04 (s, 3H), 2.03 (s, 3H), 1.97 (s, 3H), 1.90 (s, 3H). <sup>13</sup>C NMR (100 MHz, CDCl<sub>3</sub>):  $\delta$  184.95, 170.63, 169.74, 169.40, 144.11, 137.94, 132.80, 130.17, 129.64, 128.80, 128.04, 126.94, 80.06, 77.01, 71.33, 69.37, 65.09, 61.99, 44.14, 21.63, 20.72, 20.62, 20.52, 20.46; HRMS (ESI) *m/z* calc. for C<sub>29</sub>H<sub>33</sub>NO<sub>11</sub>NaS<sub>2</sub> [M+Na]<sup>+</sup> 658.1387, found 658.1386.

**(2R,3R,4S,5R,6S)-2-(acetoxymethyl)-6-(((Z)-2-phenyl-1-(tosylimino)ethyl)thio)tetrahydro-2H-pyran-3,4,5-triyl triacetate (3q)**

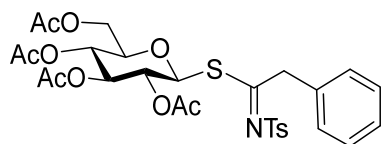

Following General Procedure II, To a solution of terminal alkyne **1a** (18.0 mg, 0.18 mmol, 1.0 equiv) in DCM (0.3 M) was added *p*-toluenesulfonyl azide (44.0 mg, 0.22 mmol, 1.2 equiv), DMAP (22.0 mg, 0.18 mmol, 1.0 equiv) and CuI (7.0 mg, 0.036 mmol, 0.2 equiv). The resulting solution was stirred at room temperature under nitrogen atmosphere for 1 hour. Then fresh prepared  $\beta$ -glucosyl 1-thiol **2q** (98.0 mg, 0.27 mmol, 1.5 equiv) were added to the reaction mixture and the reaction was stirred for 40 min. The mixture was extracted with DCM for three times and the combined organic phase was washed with brine, dried over MgSO<sub>4</sub>, filtered and concentrated. The crude products were purified by flash column chromatography (hexane/EtOAc, 3:2) to afford the desired product **3q** (76.0 mg, 66% yield) as a white solid.  $[\alpha]_D^{29}$  +10.5 (c = 0.1, CHCl<sub>3</sub>); <sup>1</sup>H NMR (400 MHz, CDCl<sub>3</sub>)  $\delta$  7.88 (d, *J* = 8.3 Hz, 2H), 7.37 (d, *J* = 8.3 Hz, 2H), 7.32 (m, TsNCH<sub>2</sub>Ph, 5H), 5.15 – 5.08 (m, H<sub>1</sub>, H<sub>3</sub>, 2H), 5.03 – 4.96 (m, H<sub>2</sub>, H<sub>4</sub>, 2H), 4.53 (d, *J* = 16.1 Hz, TsNCH<sub>2</sub>Ph, 1H), 4.33 (d, *J* = 16.1 Hz, TsNCH<sub>2</sub>Ph, 1H), 4.09 (dd, *J* = 12.5, 4.4 Hz, H<sub>6</sub>, 1H), 3.70 (dd, *J* = 12.5, 2.1 Hz, H<sub>6</sub>, 1H), 3.38 (ddd, *J* = 10.0,

4.4, 2.1 Hz, H<sub>5</sub>, 1H), 2.48 (s, 3H), 2.05 (s, 3H), 1.99 (s, 3H), 1.97 (s, 3H), 1.90 (s, 3H). <sup>13</sup>C NMR (100 MHz, CDCl<sub>3</sub>) δ 185.22, 170.60, 170.09, 169.17, 169.14, 144.18, 138.10, 132.88, 130.10, 129.60, 128.80, 128.09, 126.92, 80.79, 77.31, 73.67, 68.39, 67.54, 61.19, 44.36, 21.64, 20.68, 20.53, 20.38; HRMS (ESI) *m/z* calc. for C<sub>29</sub>H<sub>33</sub>NO<sub>11</sub>NaS<sub>2</sub> [M+Na]<sup>+</sup> 658.1387, found 658.1387.

**(2R,3S,4S,5R,6S)-2-(acetoxymethyl)-6-(((Z)-2-phenyl-1-(tosylimino)ethyl)thio)tetrahydro-2H-pyran-3,4,5-triyl triacetate (3r)**

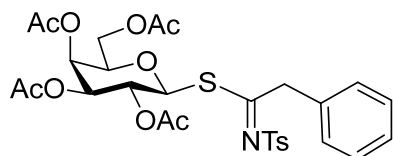

Following General Procedure II, To a solution of terminal alkyne **1a** (43.0 mg, 0.42 mmol, 1.0 equiv) in DCM (0.3 M) was added *p*-toluenesulfonyl azide (100.0 mg, 0.50 mmol, 1.2 equiv), DMAP (51.0 mg, 0.42 mmol, 1.0 equiv) and CuI (16.0 mg, 0.084 mmol, 0.2 equiv). The resulting solution was stirred at room temperature under nitrogen atmosphere for 1 hour. Then fresh prepared β-galactosyl 1-thiol **2r** (228.0 mg, 0.63 mmol, 1.5 equiv) were added to the reaction mixture and the reaction was stirred for 1.5 h. The mixture was extracted with DCM for three times and the combined organic phase was washed with brine, dried over MgSO<sub>4</sub>, filtered and concentrated. The crude products were purified by flash column chromatography (hexane/EtOAc, 3:2) to afford the desired product **3r** (166.0 mg, 63% yield) as a colorless oil. [α]<sub>D</sub><sup>29</sup> +23.6 (c = 0.1, CHCl<sub>3</sub>); <sup>1</sup>H NMR (400 MHz, CDCl<sub>3</sub>) δ 7.83 (d, *J* = 8.1 Hz, 2H), 7.31 (d, *J* = 8.1 Hz, 2H), 7.26 (m, TsNCH<sub>2</sub>Ph, 5H), 5.28 (d, *J* = 3.2 Hz, H<sub>4</sub>, 1H), 5.14 (t, *J* = 10.1 Hz, H<sub>2</sub>, 1H), 5.05 (d, *J* = 10.5 Hz, H<sub>1</sub>, 1H), 4.88 (dd, *J* = 9.7, 3.2 Hz, H<sub>3</sub>, 1H), 4.46 (d, *J* = 16.1 Hz, TsNCH<sub>2</sub>Ph, 1H), 4.31 (d, *J* = 16.1 Hz, TsNCH<sub>2</sub>Ph, 1H), 3.90 (dd, *J* = 11.2, 6.6 Hz, H<sub>6</sub>, 1H), 3.78 (dd, *J* = 11.2, 6.6 Hz, H<sub>6</sub>, 1H), 3.60 (t, *J* = 6.6 Hz, H<sub>5</sub>, 1H), 2.40 (s, 3H), 2.03 (s, 3H), 1.97 (s, 3H), 1.89 (s, 3H), 1.85 (s, 3H). <sup>13</sup>C NMR (101 MHz, cdcl<sub>3</sub>) δ 185.26, 170.13, 170.03, 169.92, 169.31, 144.06, 138.16, 132.96, 130.08, 129.63, 128.78, 128.05, 126.84, 81.21, 74.85, 71.70, 66.86, 65.79, 60.88, 44.39, 21.61, 20.59, 20.55, 20.51, 20.46; HRMS (ESI) *m/z* calc. for C<sub>29</sub>H<sub>33</sub>NO<sub>11</sub>NaS<sub>2</sub> [M+Na]<sup>+</sup> 658.1387, found: 658.1380.

### (*E*)-*N*-(2-aminobenzyl)-2-phenyl-*N'*-tosylacetimidamide (**5a**)

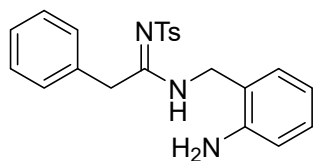

To a solution of **3b** (50.0 mg, 0.126 mmol, 1.0 equiv) in DCM (0.3M) was added 2-aminobenzylamine (0.151 mmol, 1.2 equiv) stirred at room temperature under nitrogen atmosphere. The resulting reaction mixture was stirred for 2 hours until the reaction was complete as indicated by TLC. After the reaction was completed, the mixture was extracted with DCM for three times and combined organic layer was washed with brine, dried over MgSO<sub>4</sub>, filtered and concentrated. The crude product was purified by column chromatography (hexan/EtOAc, 2:1) to afford **5a** (47.0 mg, 95%) as a white solid, m.p. 148-149 °C; <sup>1</sup>H NMR (400 MHz, CDCl<sub>3</sub>): δ 7.86 (d, *J* = 8.3 Hz, 2H), 7.37-7.27 (m, 5H), 7.17 (dd, *J* = 7.4, 1.7 Hz, 2H), 7.07 (td, *J* = 7.7, 1.5 Hz, 1H), 6.85 (dd, *J* = 7.5, 1.3 Hz, 1H), 6.64-6.58 (m, 2H), 5.53 (br, s, 1H), 4.34 (d, *J* = 6.0 Hz, 2H), 4.30 (s, 2H), 3.99 (br, s, 2H), 2.43 (s, 3H); <sup>13</sup>C NMR (100 MHz, CDCl<sub>3</sub>): δ 166.5, 145.3, 142.4, 140.2, 132.6, 130.4, 130.0, 129.3, 129.2, 128.0, 126.3, 120.2, 118.0, 116.0, 42.9, 39.4, 21.4. HRMS (EI) *m/z*: [M]<sup>+</sup> calcd. for C<sub>22</sub>H<sub>23</sub>SN<sub>3</sub>O<sub>2</sub>: 393.1511, found: 393.1521.

### 2-Benzyl-3,4-dihydroquinazoline (**6a**)

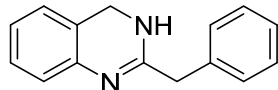

Following General Procedure III, using **3b** (50.0 mg, 0.126 mmol, 1.0 equiv), 2-aminobenzylamine (19.0 mg, 0.152 mmol, 1.2 equiv) and PTSA (48.0 mg, 0.253 mmol, 2.0 equiv). The crude product was purified by column chromatography (DCM/MeOH, 10:1) to afford **6a** (25.0 mg, 90%) as a yellow sticky oil. <sup>1</sup>H NMR (400 MHz, CDCl<sub>3</sub>): δ 7.39 (d, *J* = 7.2 Hz, 2H), 7.31-7.20 (m, 3H), 7.11 (t, *J* = 7.6 Hz, 1H), 7.01 (t, *J* = 7.8 Hz, 2H), 6.86 (d, *J* = 7.4 Hz, 1H), 6.51 (br, s, 1H), 4.60 (s, 2H), 3.74 (s, 2H); <sup>13</sup>C NMR (100 MHz, CDCl<sub>3</sub>): δ 158.3, 137.6, 134.8, 129.2, 128.9, 128.3, 127.5, 125.8, 125.1, 119.5, 118.6, 43.8, 40.7. HRMS (EI) *m/z*: [M]<sup>+</sup> calcd. for C<sub>15</sub>H<sub>14</sub>N<sub>2</sub>: 222.1157, found: 222.1151.

### 2-(4-Methylbenzyl)-3,4-dihydroquinazoline (**6b**)

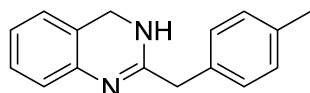

Following General Procedure III, using **4h** (50.0 mg, 0.117 mmol), 2-aminobenzylamine (17.0 mg, 0.140 mmol), and PTSA (45.0 mg, 0.234 mmol). The product was purified by column chromatography (DCM/MeOH, 10:1) to afford **6b**

(25.0 mg, 88% yield) as a colorless sticky oil;  $^1\text{H}$  NMR (400 MHz,  $\text{CDCl}_3$ ):  $\delta$  7.28 (d,  $J = 6.8$  Hz, 2H), 7.15-7.07 (m, 3H), 7.04-6.98 (m, 2H), 6.87 (d,  $J = 7.4$  Hz, 1H), 5.86 (br, s, 1H), 4.60 (s, 2H), 3.72 (s, 2H), 2.29 (s, 3H);  $^{13}\text{C}$  NMR (100 MHz,  $\text{CDCl}_3$ ):  $\delta$  157.5, 139.8, 137.1, 132.2, 129.6, 129.1, 128.1, 125.6, 124.4, 120.3, 119.4, 44.5, 41.7, 21.0. HRMS (EI)  $m/z$ :  $[\text{M}]^+$  calcd. for  $\text{C}_{16}\text{H}_{16}\text{N}_2$ : 236.1313, found: 236.1314.

### 2-(4-Methoxybenzyl)-3,4-dihydroquinazoline (6c)

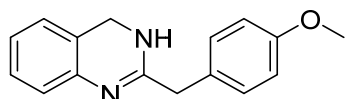

Following General Procedure III, using **4i** (50.0 mg, 0.113 mmol), 2-aminobenzylamine (17.0 mg, 0.135 mmol), and PTSA (43.0 mg, 0.225 mmol). The product was purified by column chromatography (DCM/MeOH, 10:1) to afford **6c** (26.6 mg, 94% yield) as a colorless sticky oil;  $^1\text{H}$  NMR (400 MHz,  $\text{CDCl}_3$ ):  $\delta$  7.32 (d,  $J = 8.4$  Hz, 2H), 7.10 (t,  $J = 7.5$  Hz, 1H), 7.03 (d,  $J = 7.6$  Hz, 1H), 7.00 (t,  $J = 7.4$  Hz, 1H), 6.85 (d,  $J = 7.4$  Hz, 1H), 6.79 (d,  $J = 8.5$  Hz, 2H), 6.47 (s, br, 1H), 4.59 (s, 2H), 3.71 (s, 3H), 3.70 (s, 2H);  $^{13}\text{C}$  NMR (100 MHz,  $\text{CDCl}_3$ ):  $\delta$  158.9, 158.8, 137.4, 130.3, 128.3, 126.5, 125.8, 125.1, 119.3, 118.5, 114.3, 55.2, 43.7, 39.7. HRMS (EI)  $m/z$ :  $[\text{M}]^+$  calcd. for  $\text{C}_{16}\text{H}_{16}\text{ON}_2$ : 252.1263, found: 252.1257.

### 2-(Naphthalen-2-ylmethyl)-3,4-dihydroquinazoline (6d)

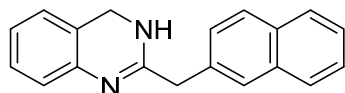

Following General Procedure III, using **4j** (50.0 mg, 0.108 mmol), 2-aminobenzylamine (16.0 mg, 0.129 mmol), and PTSA (41.0 mg, 0.216 mmol). The product was purified by column chromatography (DCM/MeOH, 10:1) to afford **6d** (27.2 mg, 93% yield) as a sticky oil;  $^1\text{H}$  NMR (400 MHz,  $\text{CDCl}_3$ ):  $\delta$  7.80-7.69 (m, 4H), 7.47-7.39 (m, 3H), 7.08 (t,  $J = 7.5$  Hz, 1H), 7.00-6.93 (m, 2H), 6.79 (d,  $J = 7.5$  Hz, 1H), 5.66 (br, s, 1H), 4.53 (s, 2H), 3.82 (s, 2H);  $^{13}\text{C}$  NMR (100 MHz,  $\text{CDCl}_3$ ):  $\delta$  158.9, 136.0, 133.3, 132.5, 131.7, 128.7, 128.4, 128.3, 127.6, 126.8, 126.3, 126.1, 125.8, 125.5, 119.0, 118.0, 43.3, 40.0. HRMS (EI)  $m/z$ :  $[\text{M}]^+$  calcd. for  $\text{C}_{19}\text{H}_{16}\text{N}_2$ : 272.1313, found: 272.1316.

### 1-(4-((3,4-Dihydroquinazolin-2-yl)methyl)phenyl)ethan-1-one (6e)

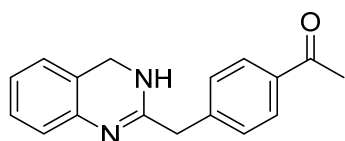

Following General Procedure IV, using **4k** (50.0 mg, 0.110 mmol), 2-aminobenzylamine (16.0 mg, 0.132 mmol), and PTSA (42.0 mg, 0.220 mmol). The product was purified by column chromatography (DCM/MeOH, 10:1) to afford **6e** (27.2 mg, 94% yield) as a colorless sticky oil; <sup>1</sup>H NMR (400 MHz, CDCl<sub>3</sub>): δ 7.81 (d, *J* = 8.2 Hz, 2H), 7.53 (d, *J* = 8.2 Hz, 2H), 7.12-7.08 (m, 1H), 7.04-7.00 (m, 2H), 6.87 (d, *J* = 7.3 Hz, 1H), 6.18 (br, s, 1H), 4.63 (s, 2H), 3.85 (s, 2H), 2.49 (s, 3H); <sup>13</sup>C NMR (100 MHz, CDCl<sub>3</sub>): δ 197.6, 157.9, 140.0, 136.5, 136.2, 129.4, 128.8, 128.5, 125.9, 125.6, 119.1, 118.2, 43.7, 40.1, 26.5. HRMS (EI) *m/z*: [M]<sup>+</sup> calcd. for C<sub>17</sub>H<sub>16</sub>ON<sub>2</sub>: 264.1263, found: 264.1270.

### 2-Pentyl-3,4-dihydroquinazoline (**6f**)

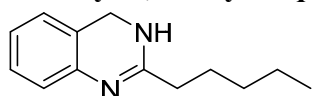

Following General Procedure III, using **4m** (110.0 mg, 0.280 mmol), 2-aminobenzylamine (41.0 mg, 0.335 mmol), and PTSA (106.0 mg, 0.559 mmol). The product was purified by column chromatography (DCM/MeOH, 10:1) to afford **6f** (29.0 mg, 52% yield) as a colorless sticky oil; <sup>1</sup>H NMR (400 MHz, CDCl<sub>3</sub>): δ 7.46 (d, *J* = 7.6 Hz, 1H), 7.18 (t, *J* = 7.1 Hz, 1H), 7.13 (t, *J* = 7.0 Hz, 1H), 6.96 (d, *J* = 7.2 Hz, 1H), 4.75 (s, 2H), 2.80 (t, *J* = 7.6 Hz, 2H), 1.87 (p, *J* = 7.6 Hz, 2H), 1.44-1.21 (m, 4H), 0.81 (t, *J* = 7.1 Hz, 3H); <sup>13</sup>C NMR (100 MHz, CDCl<sub>3</sub>): δ 163.1, 131.6, 128.9, 126.9, 126.1, 117.6, 116.5, 42.1, 31.8, 30.9, 27.1, 22.2, 13.8. HRMS (EI) *m/z*: [M]<sup>+</sup> calcd. for C<sub>13</sub>H<sub>18</sub>N<sub>2</sub>: 202.1470, found: 202.1461.

### One-pot synthesis of 2-benzylquinazoline (**7**)<sup>3</sup>

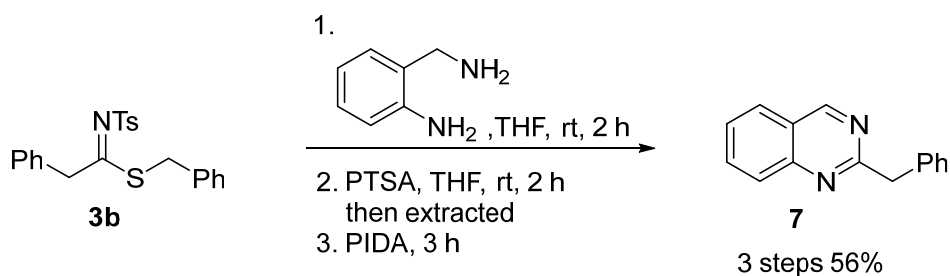

To a solution of **3b** (60.0 mg, 0.152 mmol, 1.0 equiv) in THF (0.3M) was added 2-aminobenzylamine (23.0 mg, 0.182 mmol, 1.2 equiv) stirred for 2 hours at room temperature under nitrogen atmosphere. Then the *p*-toluenesulfonic acid monohydrate (52.0 mg, 0.304 mmol, 2.0 equiv) was added to the reaction mixture and stirred for 2 hours. After the reaction was completed (as indicated by TLC), the mixture was extracted with DCM and NaHCO<sub>3</sub> for two times and the combined organic layer was washed with brine, dried over MgSO<sub>4</sub>, filtered and concentrated. The crude was utilized directly in next step without purification. To a solution of crude in THF (0.3M) was

added PIDA (147.0 mg, 0.456 mmol, 3.0 equiv) at room temperature and stirred for 3 hours. After the reaction was completed, the mixture was extracted with ethyl acetate (EA) for three times and combined organic layer was washed with brine, dried over MgSO<sub>4</sub>, filtered and concentrated. The crude product was purified by column chromatography (hexane/EtOAc, 3:1) to afford **9** (3 steps, 19.0 mg, 56% yield) as a yellow solid. m.p. 65-67 °C (reported: 68-69 °C); <sup>1</sup>H NMR (400 MHz, CDCl<sub>3</sub>): δ 9.31 (s, 1H), 8.00 (d, *J* = 8.5 Hz, 1H), 7.85 (d, *J* = 7.8 Hz, 1H), 7.82 (d, *J* = 7.8 Hz, 1H), 7.55 (t, *J* = 7.5 Hz, 1H), 7.44 (d, *J* = 7.5 Hz, 2H), 7.30 (t, *J* = 7.6 Hz, 2H), 7.20 (t, *J* = 7.3 Hz, 1H), 4.47 (s, 2H); <sup>13</sup>C NMR (100 MHz, CDCl<sub>3</sub>): δ 165.9, 160.7, 150.3, 138.4, 133.9, 129.1, 128.4, 127.9, 127.1, 126.9, 126.4, 122.9, 46.2.

### References:

- [1] Elangovan, A.; Yang, S.-W.; Lin, J.-H.; Kao, K.-M.; Ho, T.-I. *Org. Biomol. Chem.*, 2004, **2**, 1597–1602.
- [2] Guo, J.-R.; Huang, H.-Y.; Yan, Y.-L.; Liang, C.-F. *Asian J. Org. Chem.*, 2018, **7**, 179–188.
- [3] Fang, J.; Zhou, J.; Fang, Z. *RSC Adv.*, 2013, **3**, 334–336.

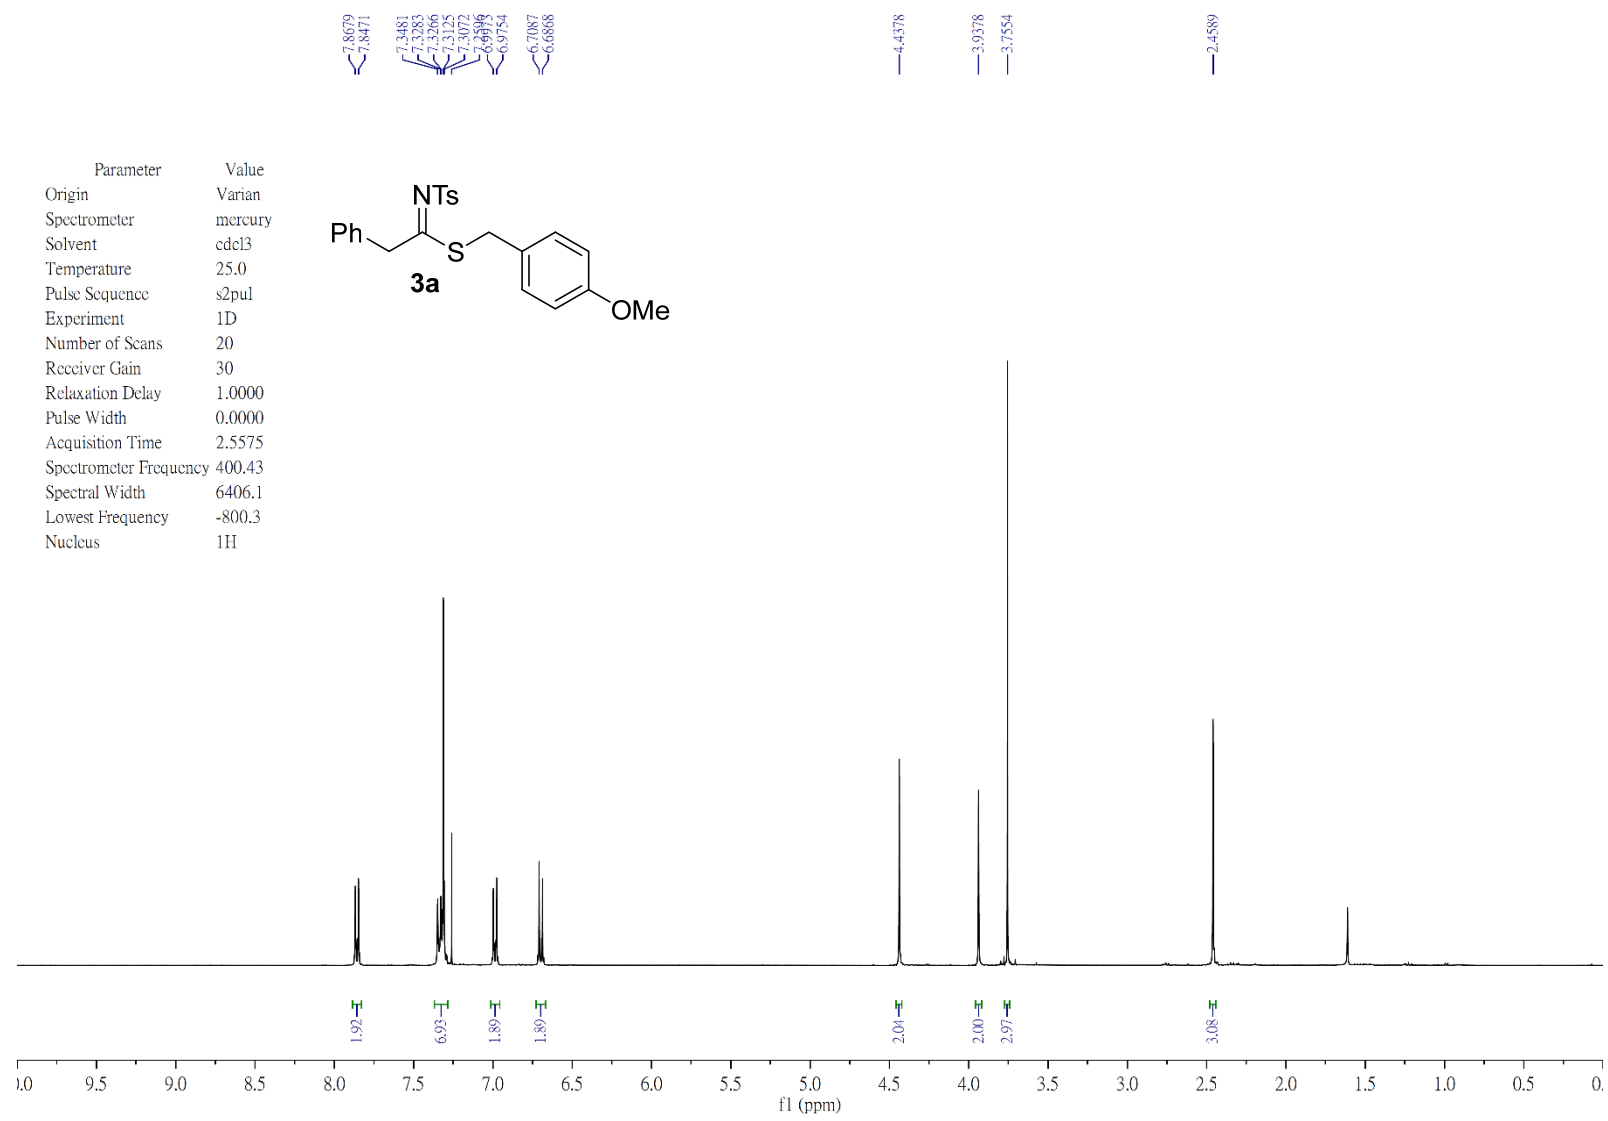



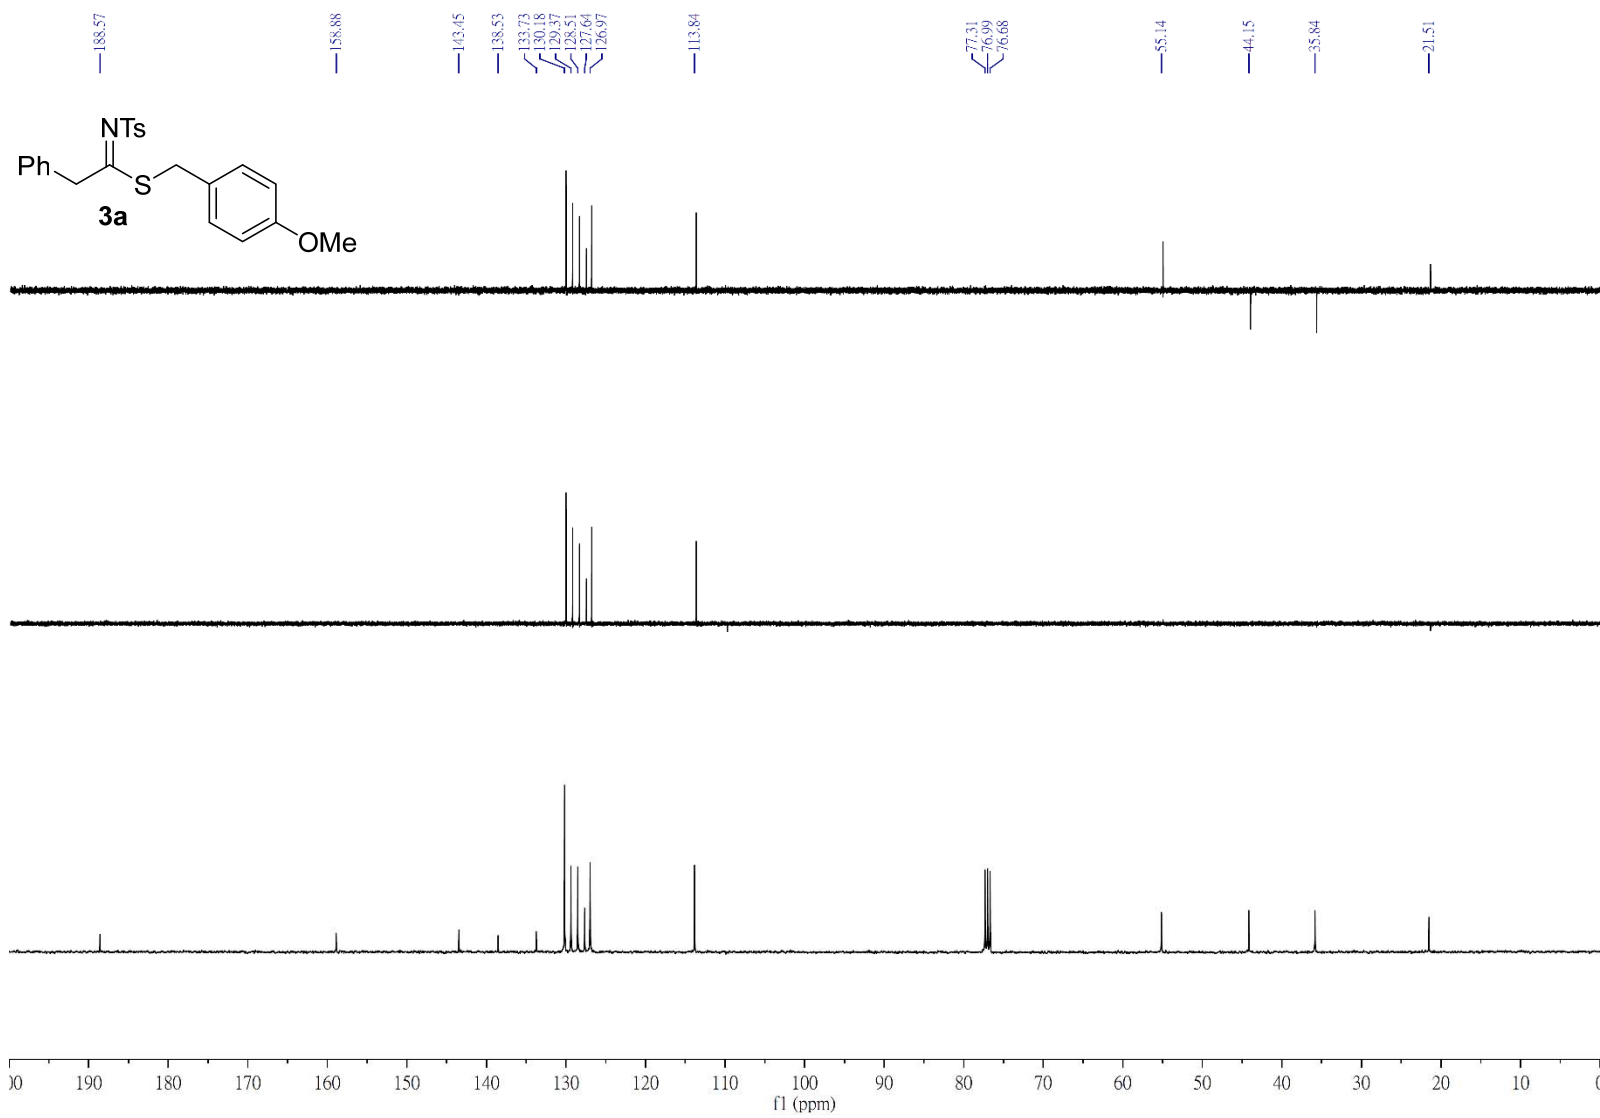

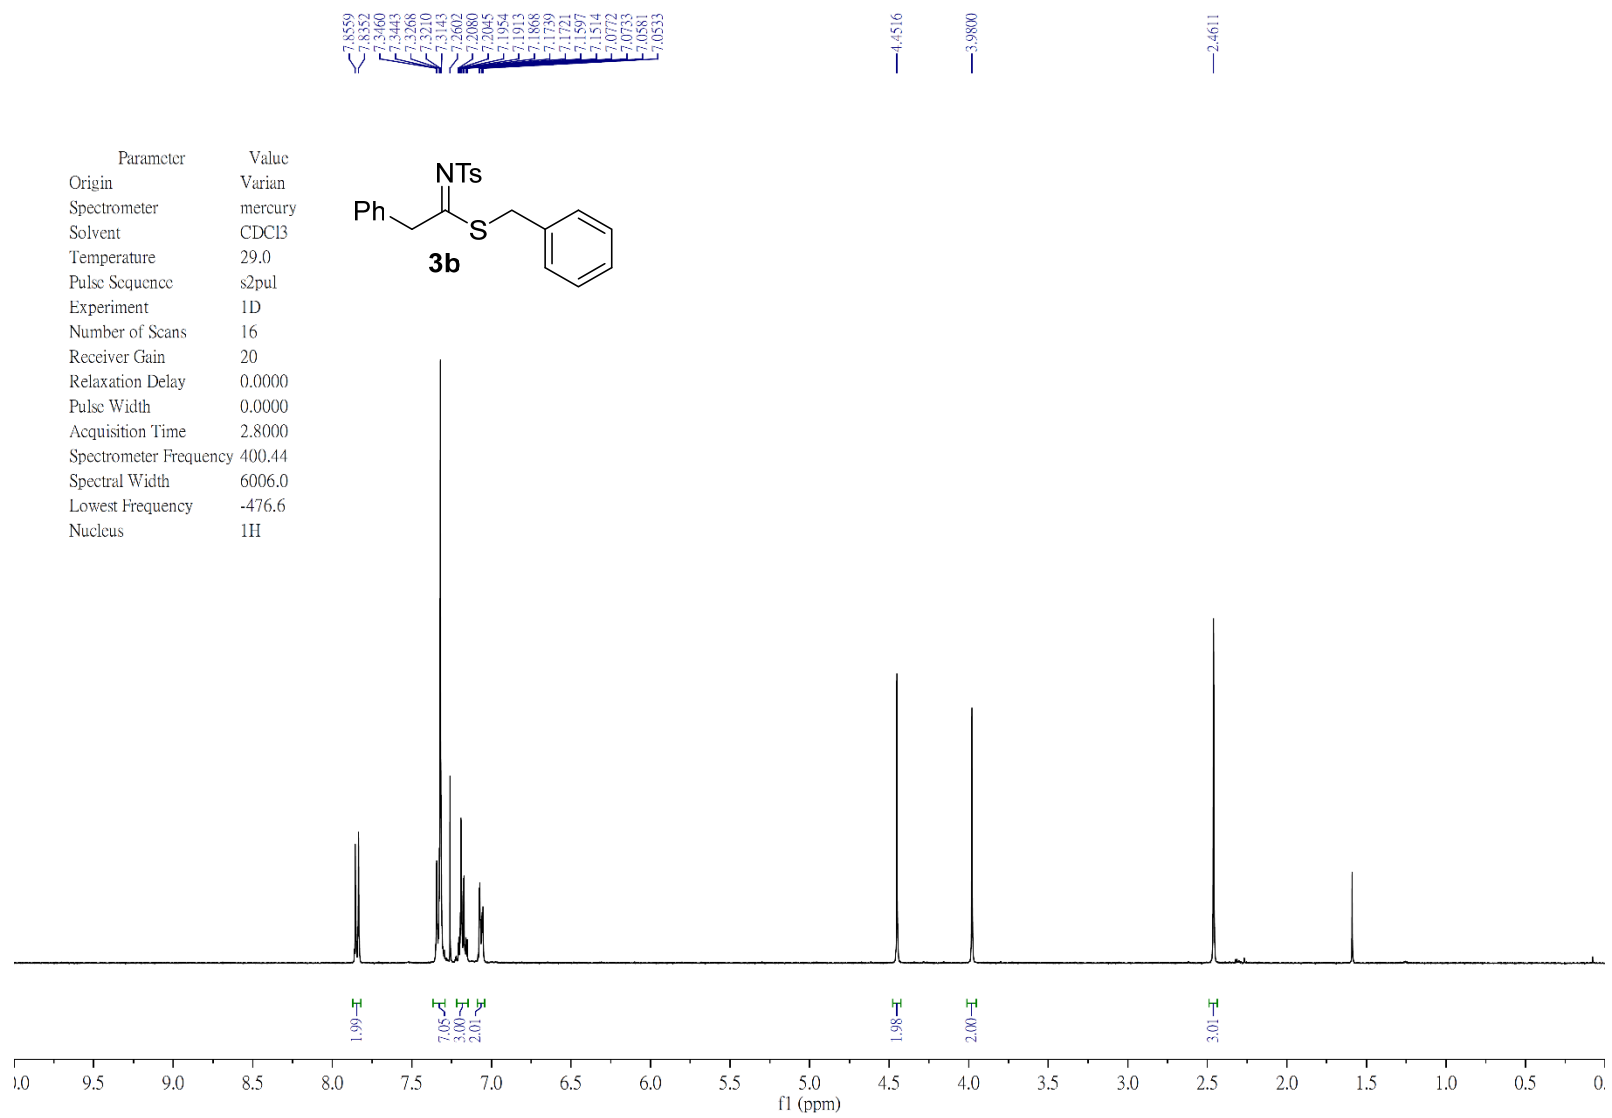

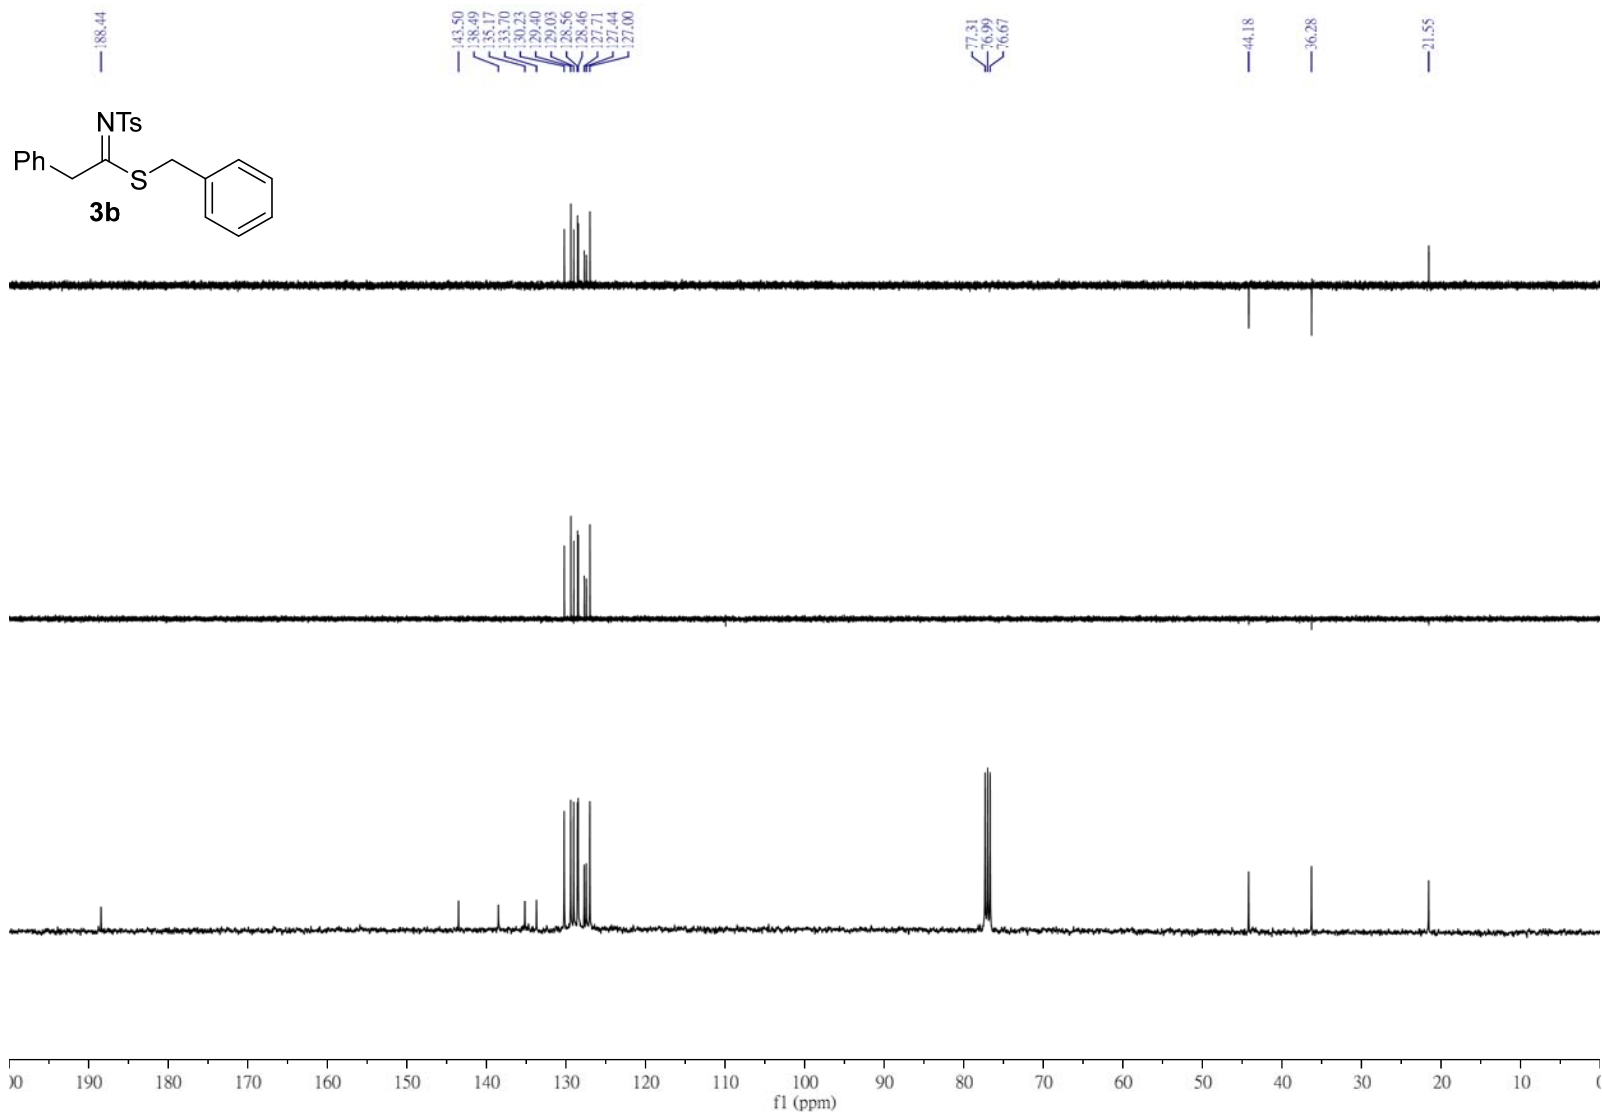

| Parameter              | Value          |
|------------------------|----------------|
| Origin                 | Varian         |
| Spectrometer           | nmrs           |
| Solvent                | cdcl3          |
| Temperature            | 20.0           |
| Pulse Sequence         | s2pul          |
| Experiment             | 1D             |
| Number of Scans        | 36             |
| Receiver Gain          | 54             |
| Relaxation Delay       | 1.0000         |
| Pulse Width            | 0.0000         |
| Acquisition Time       | 2.5559         |
| Spectrometer Frequency | 399.76         |
| Spectral Width         | 6410.3         |
| Lowest Frequency       | -799.2         |
| Nucleus                | <sup>1</sup> H |

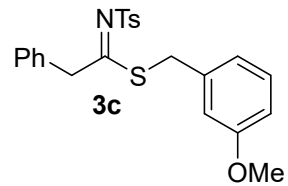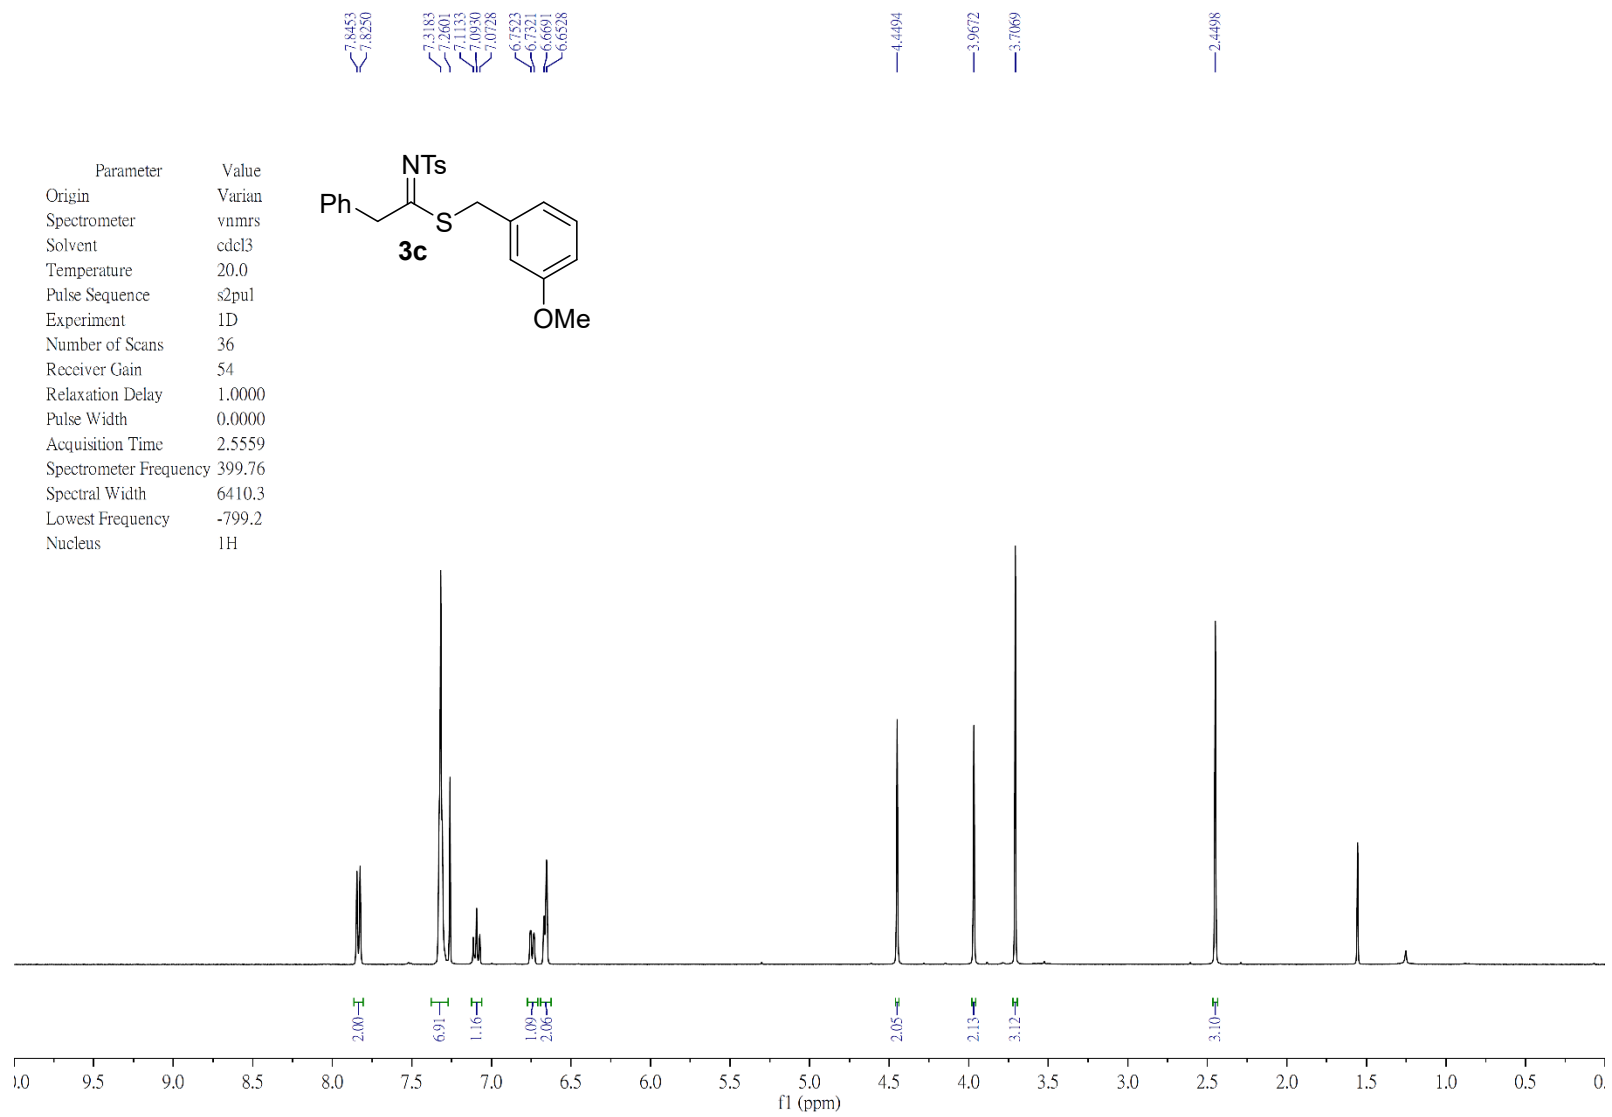

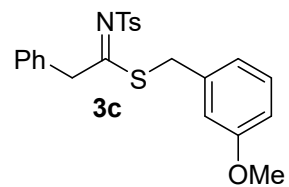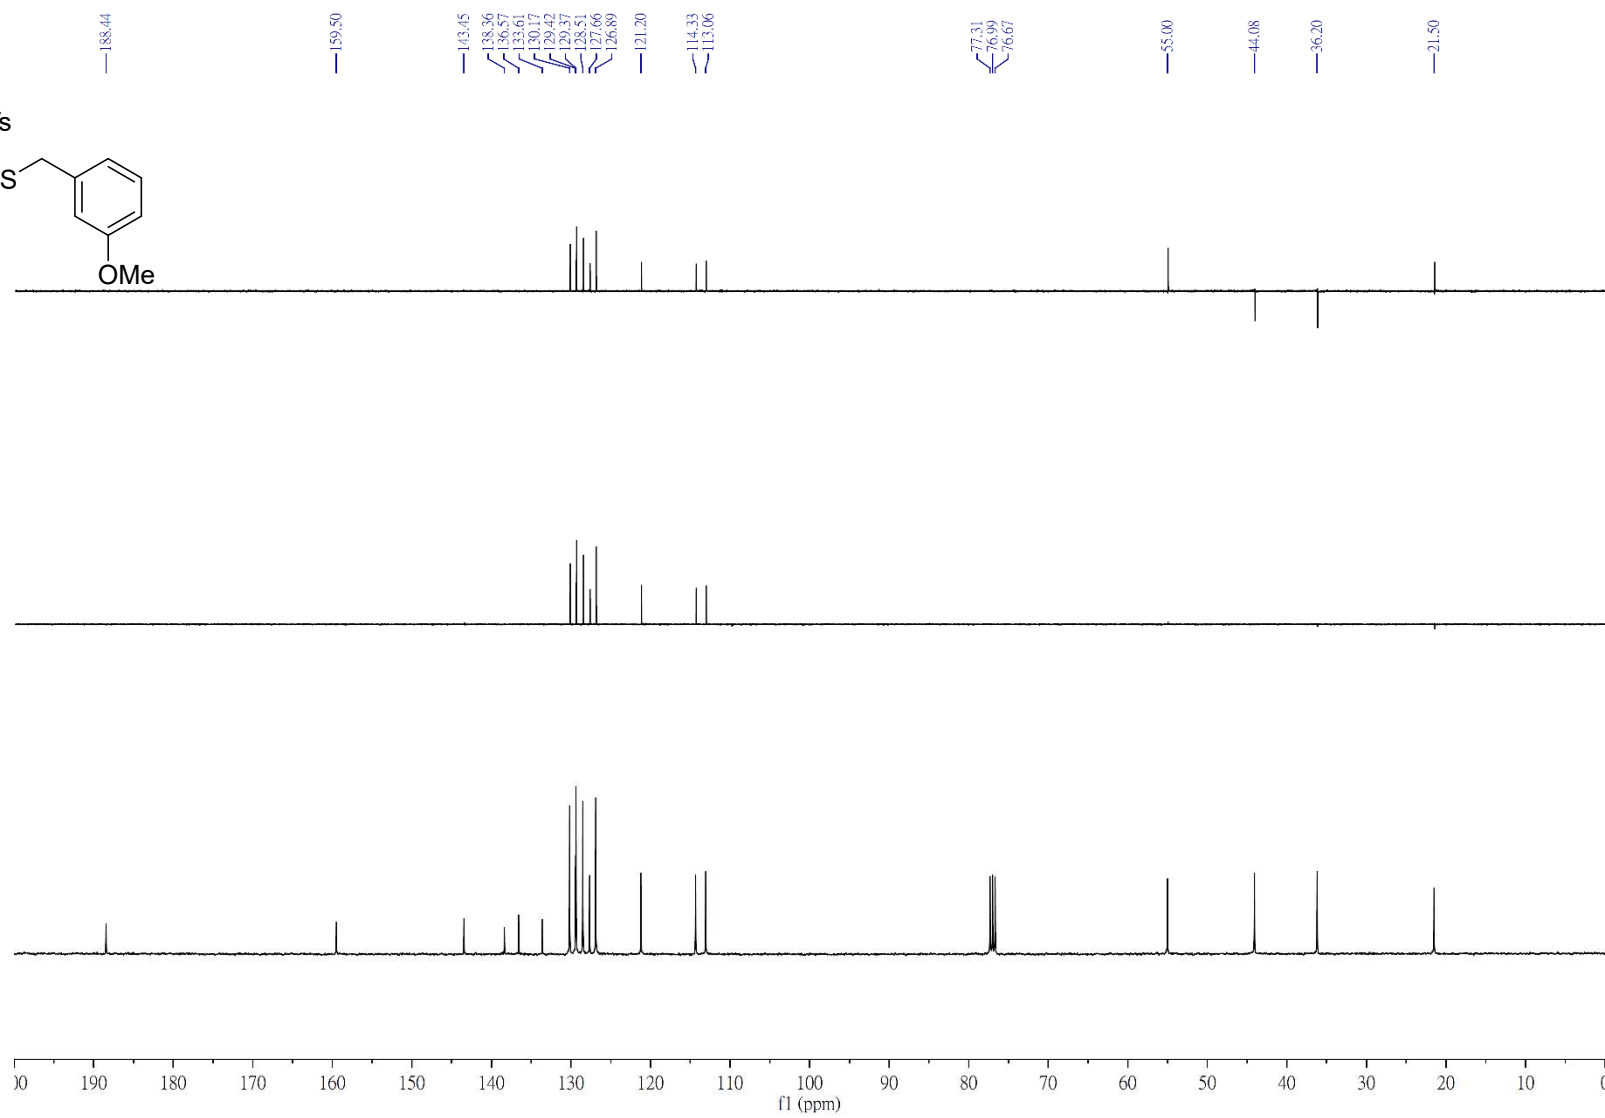

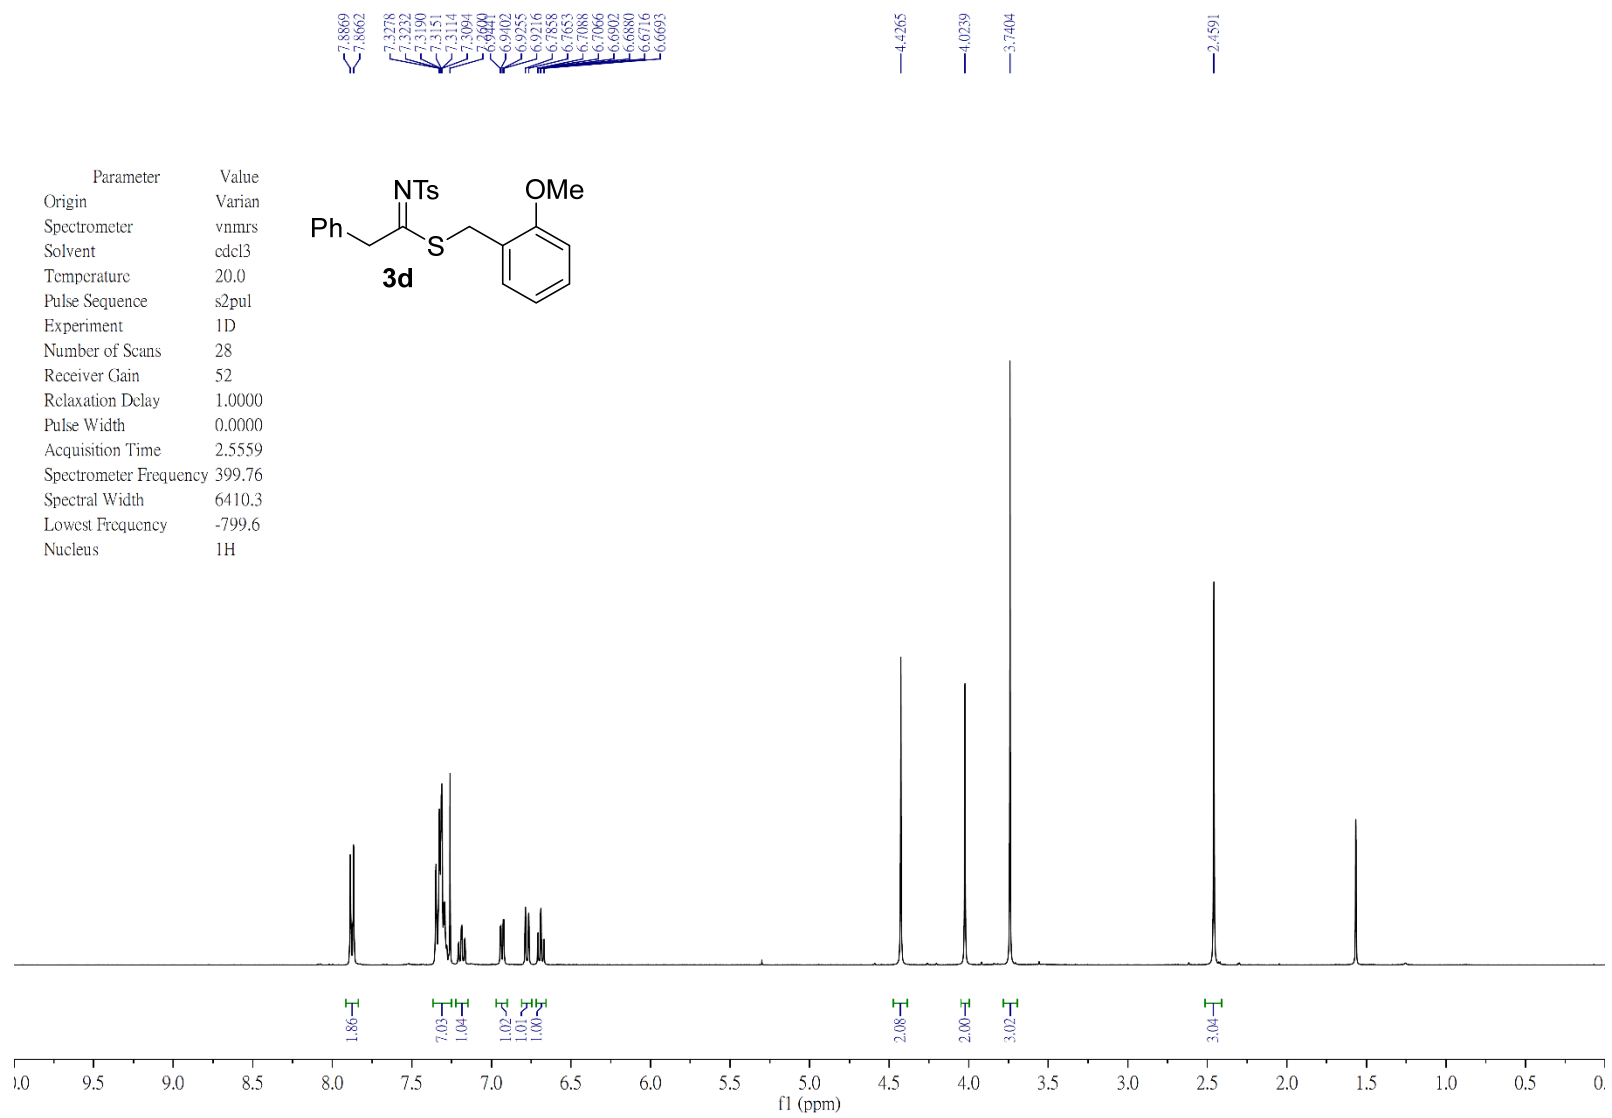

| Parameter              | Value          |
|------------------------|----------------|
| Origin                 | Varian         |
| Spectrometer           | nmrs           |
| Solvent                | cdcl3          |
| Temperature            | 20.0           |
| Pulse Sequence         | s2pul          |
| Experiment             | 1D             |
| Number of Scans        | 28             |
| Receiver Gain          | 52             |
| Relaxation Delay       | 1.0000         |
| Pulse Width            | 0.0000         |
| Acquisition Time       | 2.5559         |
| Spectrometer Frequency | 399.76         |
| Spectral Width         | 6410.3         |
| Lowest Frequency       | -799.6         |
| Nucleus                | <sup>1</sup> H |

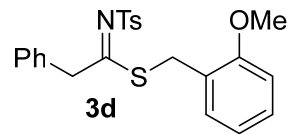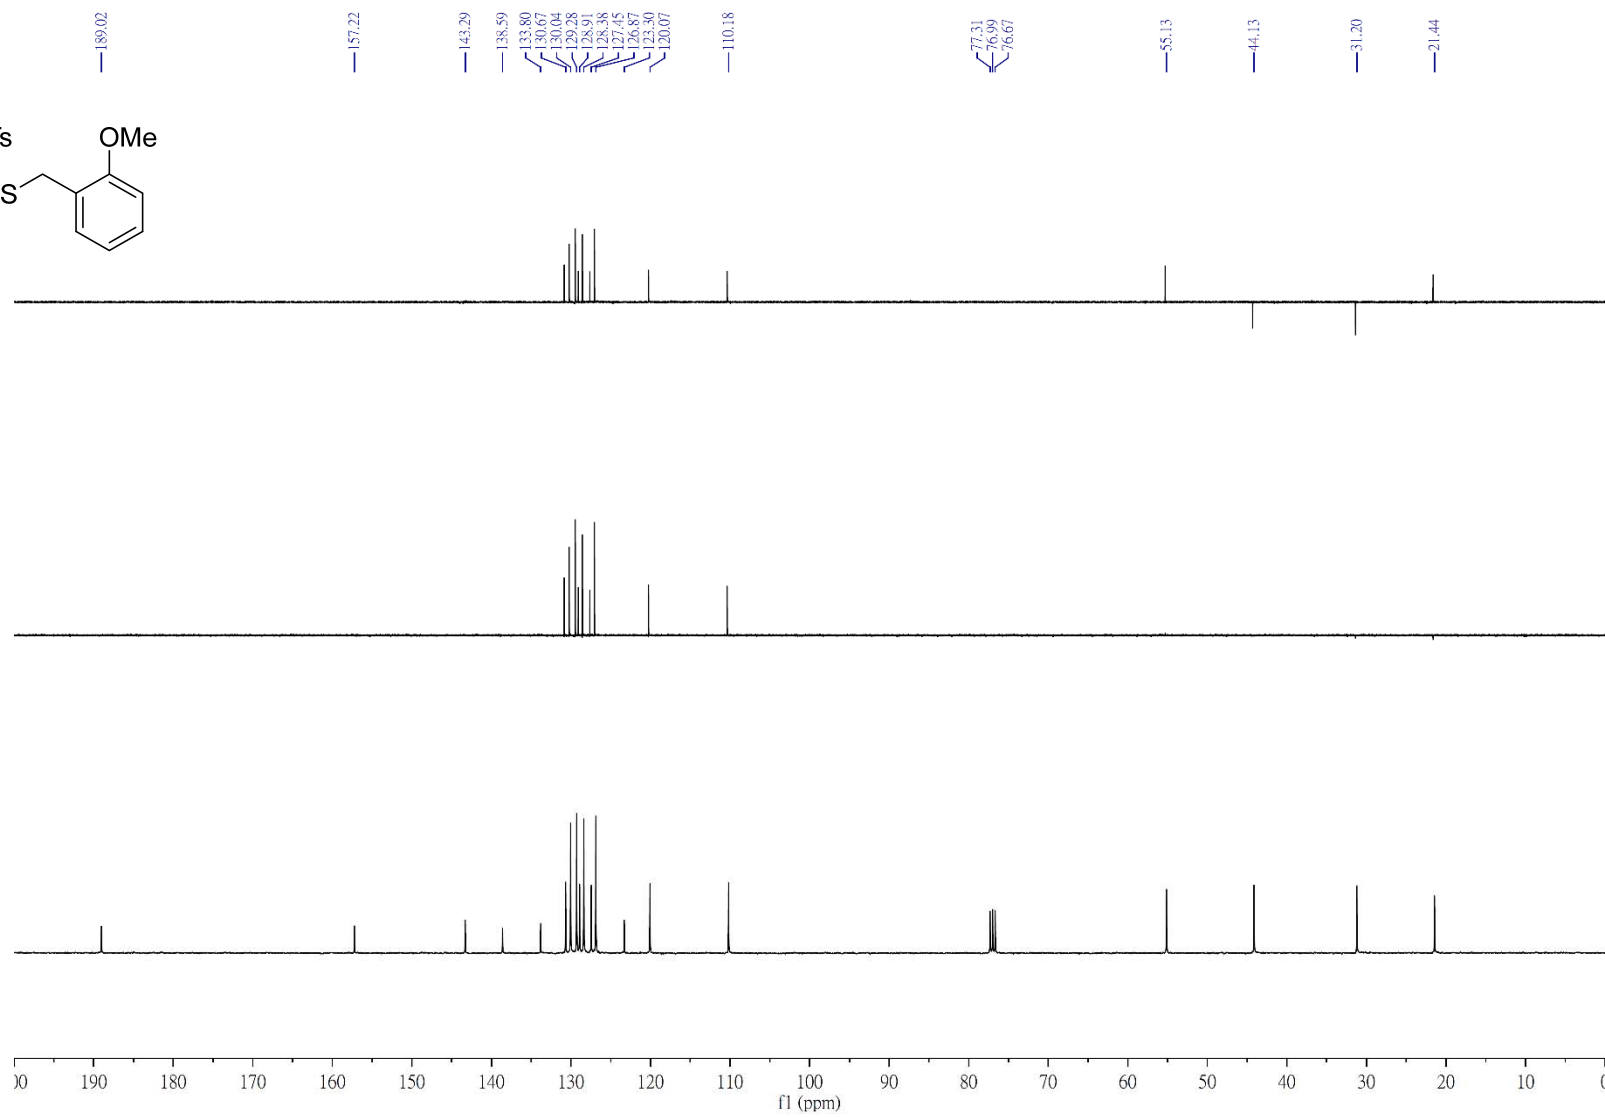

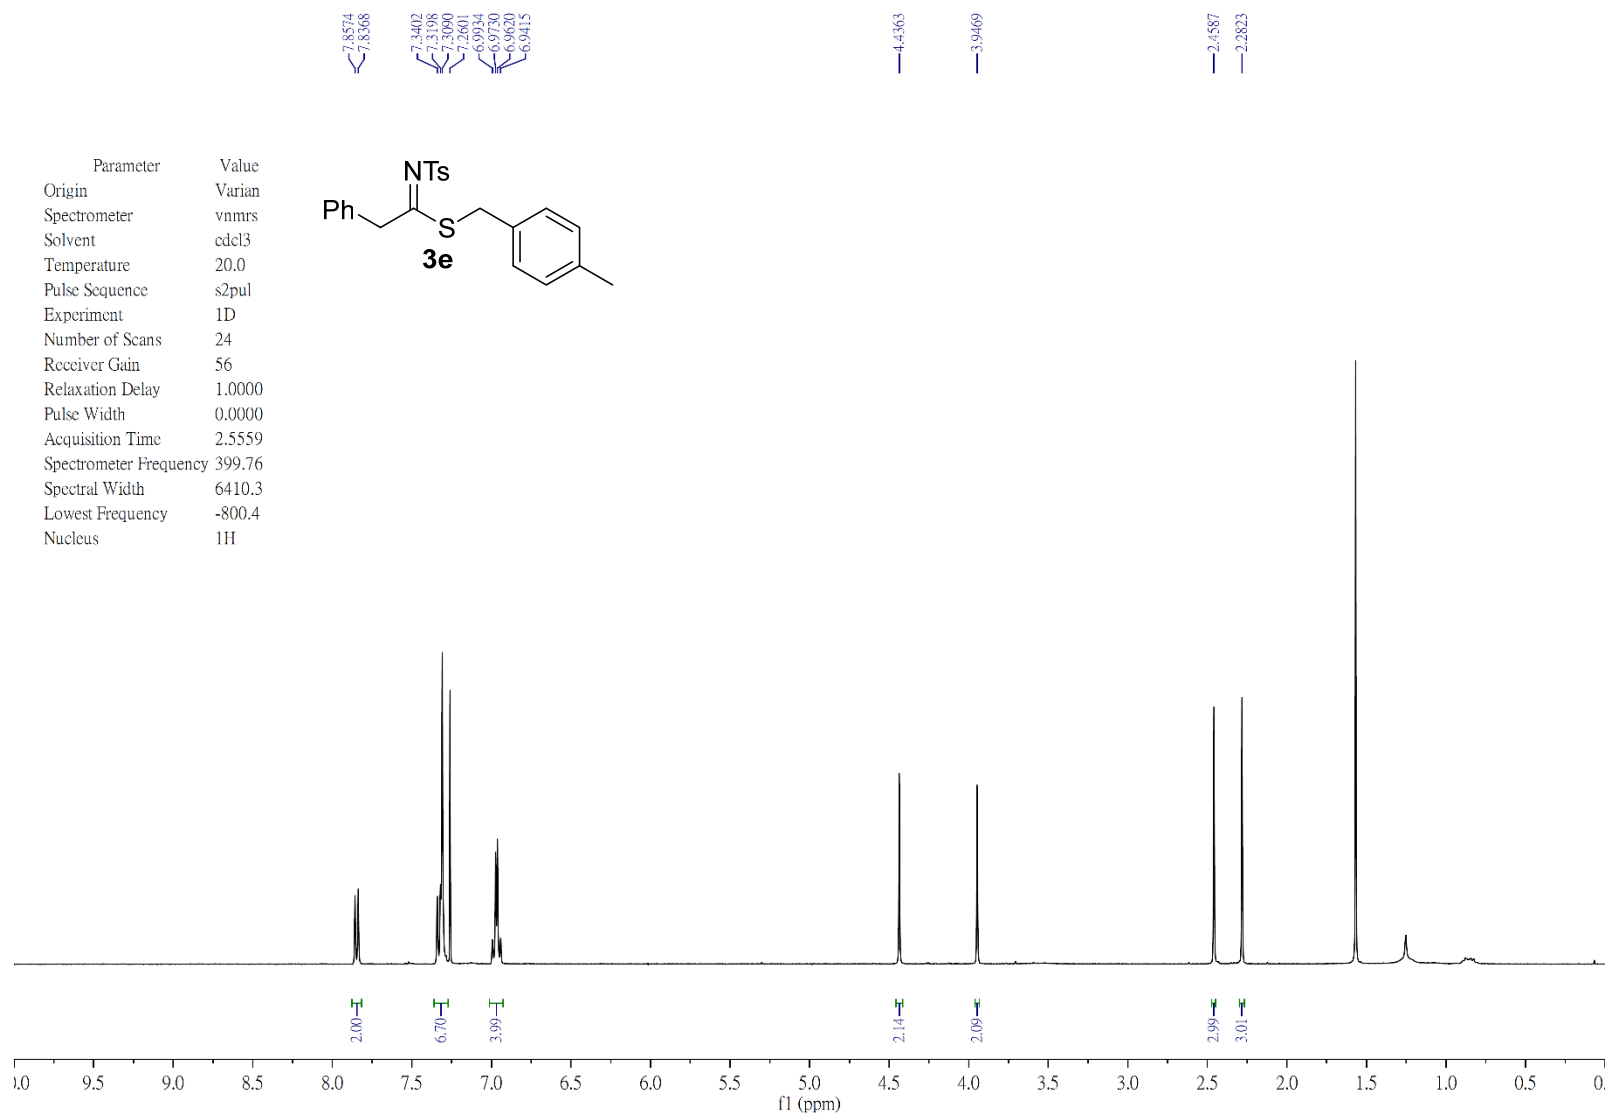





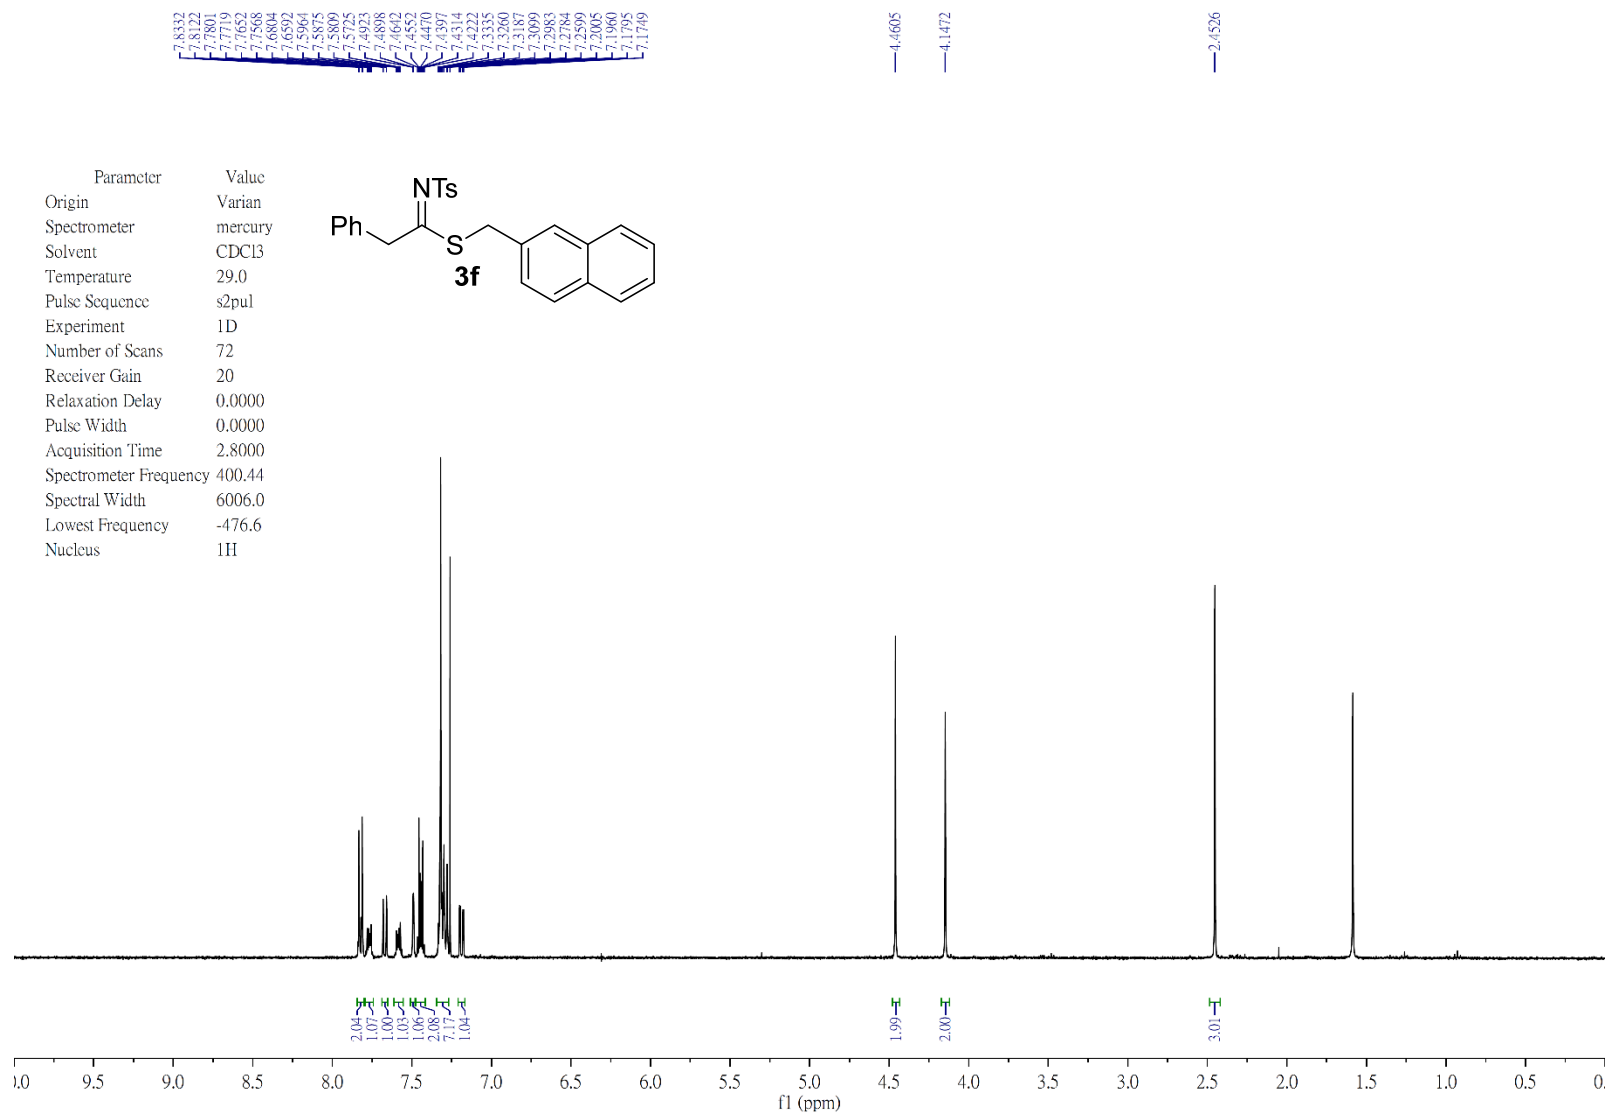

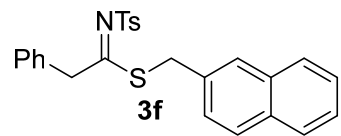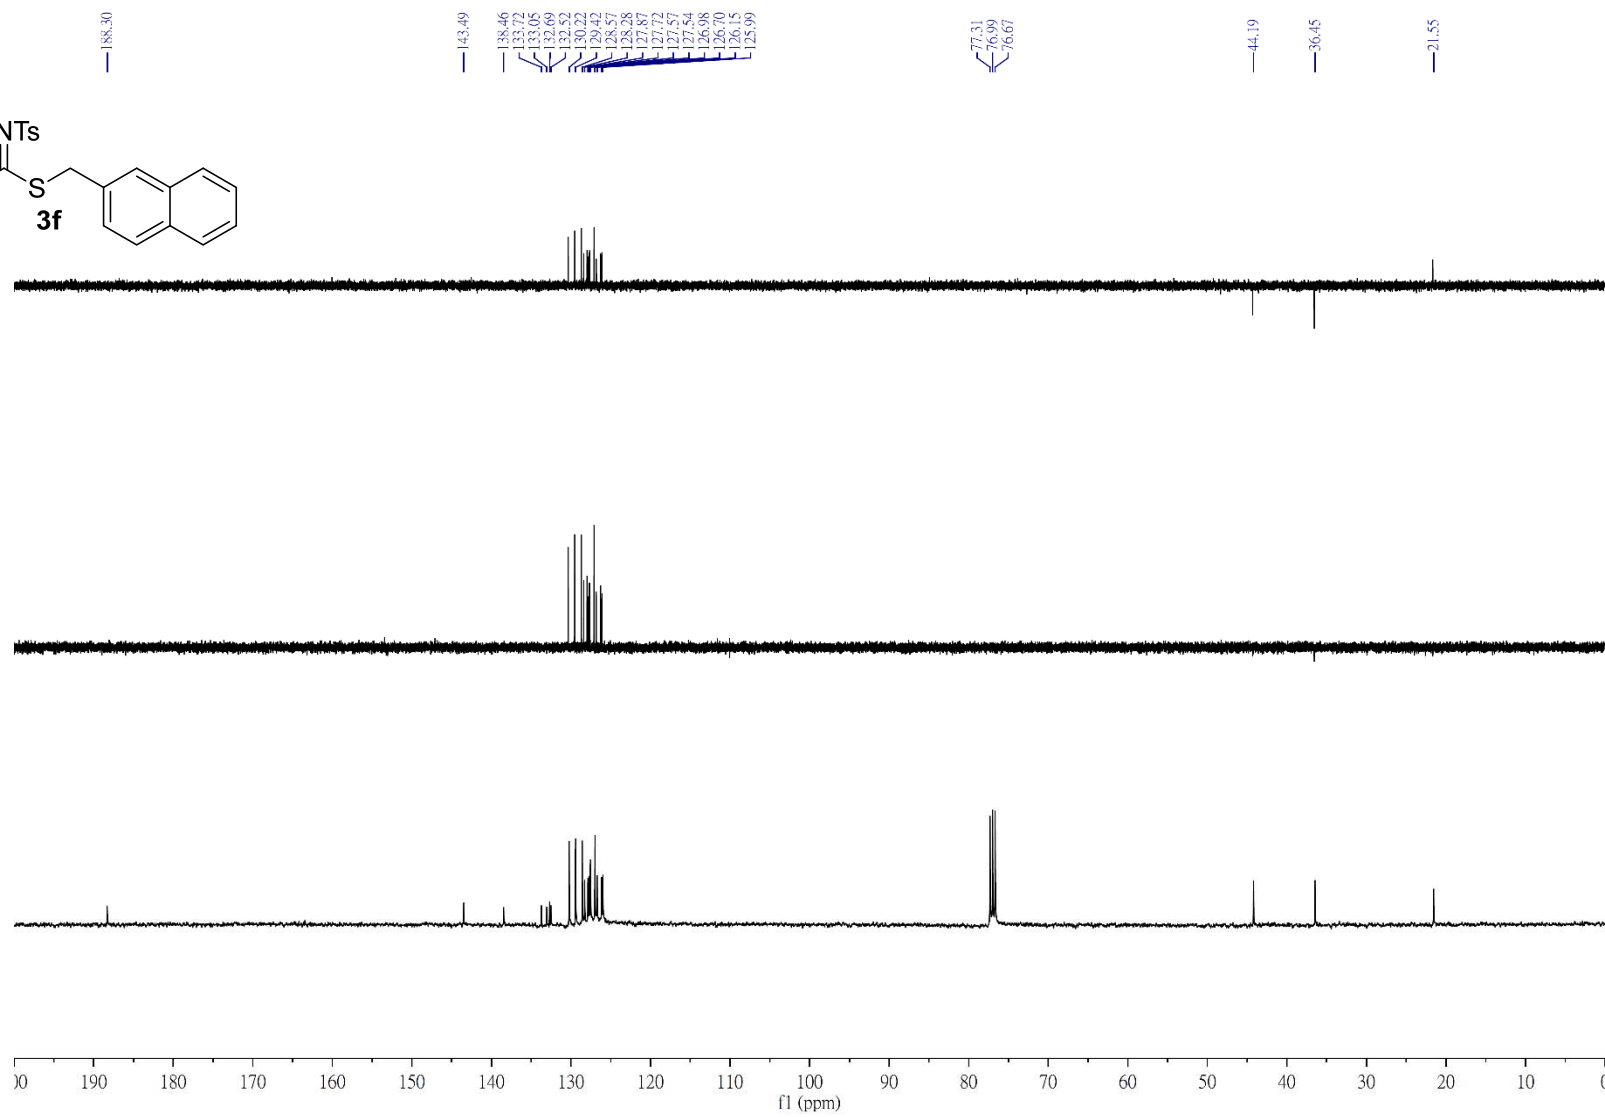

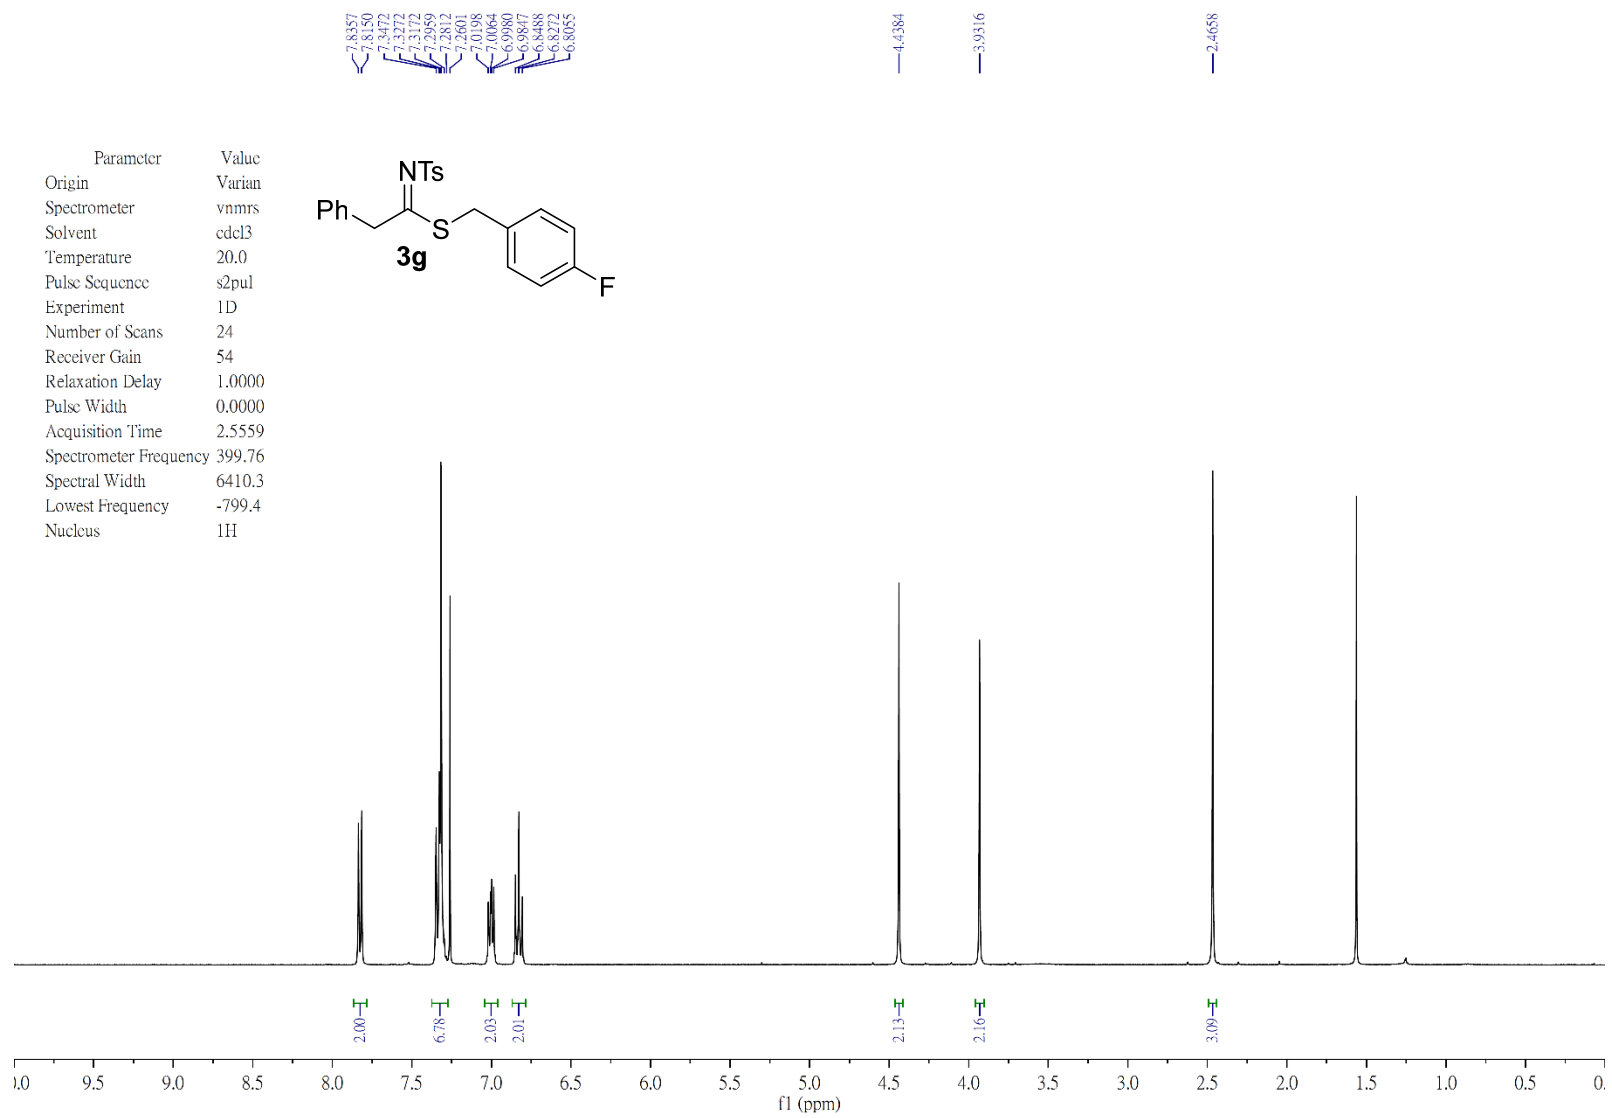

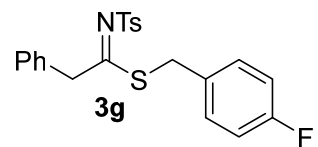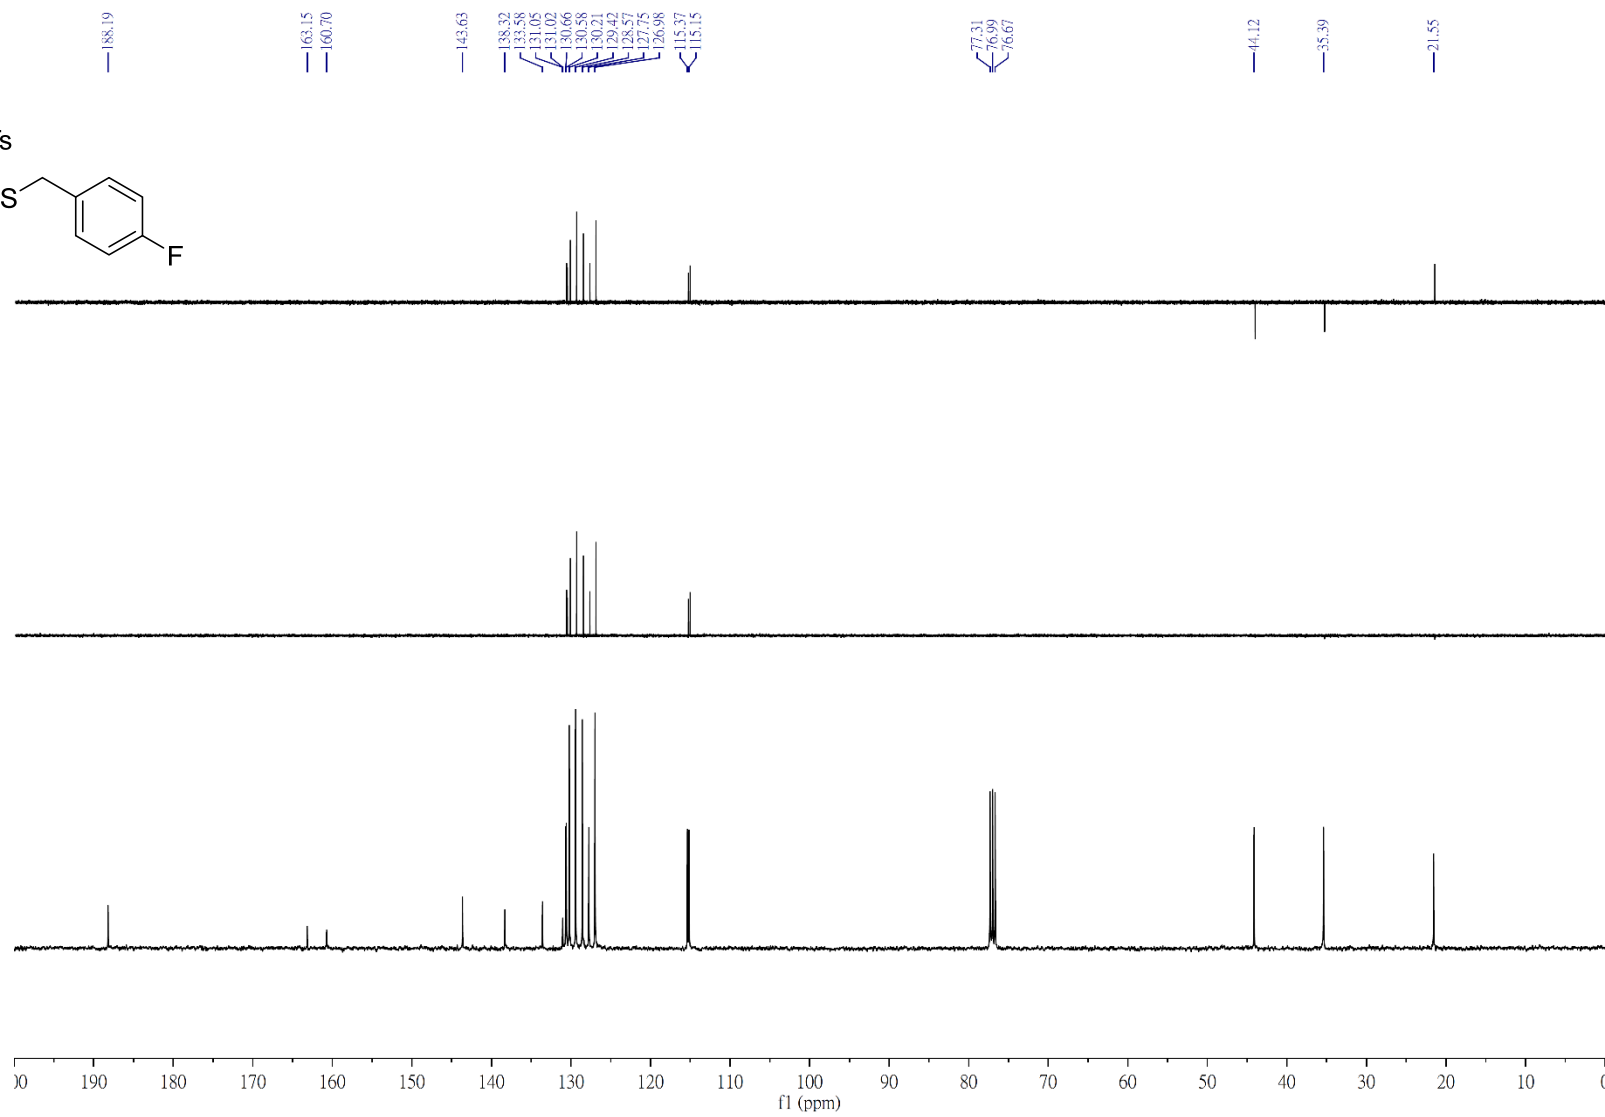

| Parameter              | Value    |
|------------------------|----------|
| Origin                 | Varian   |
| Spectrometer           | nmrs     |
| Solvent                | cdcl3    |
| Temperature            | 20.0     |
| Pulse Sequence         | s2pul    |
| Experiment             | 1D       |
| Number of Scans        | 4        |
| Receiver Gain          | 60       |
| Relaxation Delay       | 1.0000   |
| Pulse Width            | 0.0000   |
| Acquisition Time       | 0.7340   |
| Spectrometer Frequency | 376.11   |
| Spectral Width         | 89285.7  |
| Lowest Frequency       | -77332.4 |
| Nucleus                | 19F      |

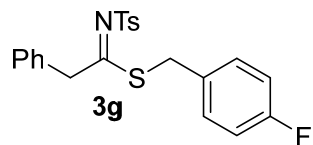

-115.978

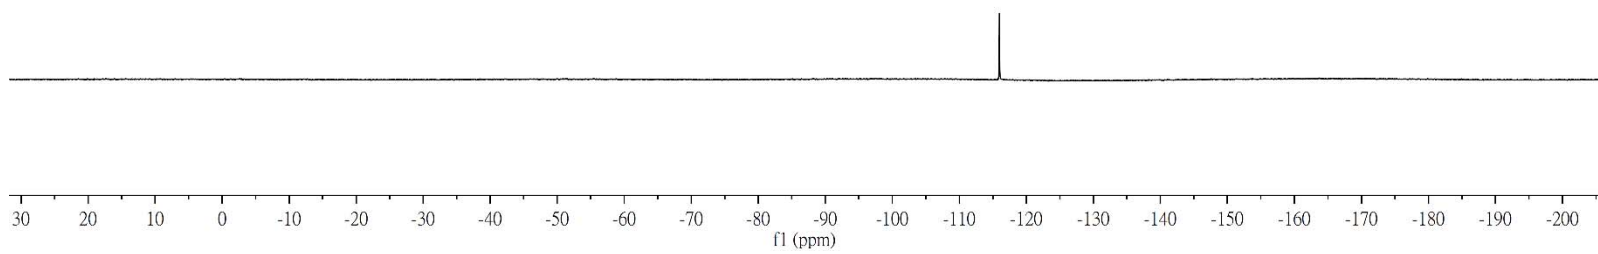

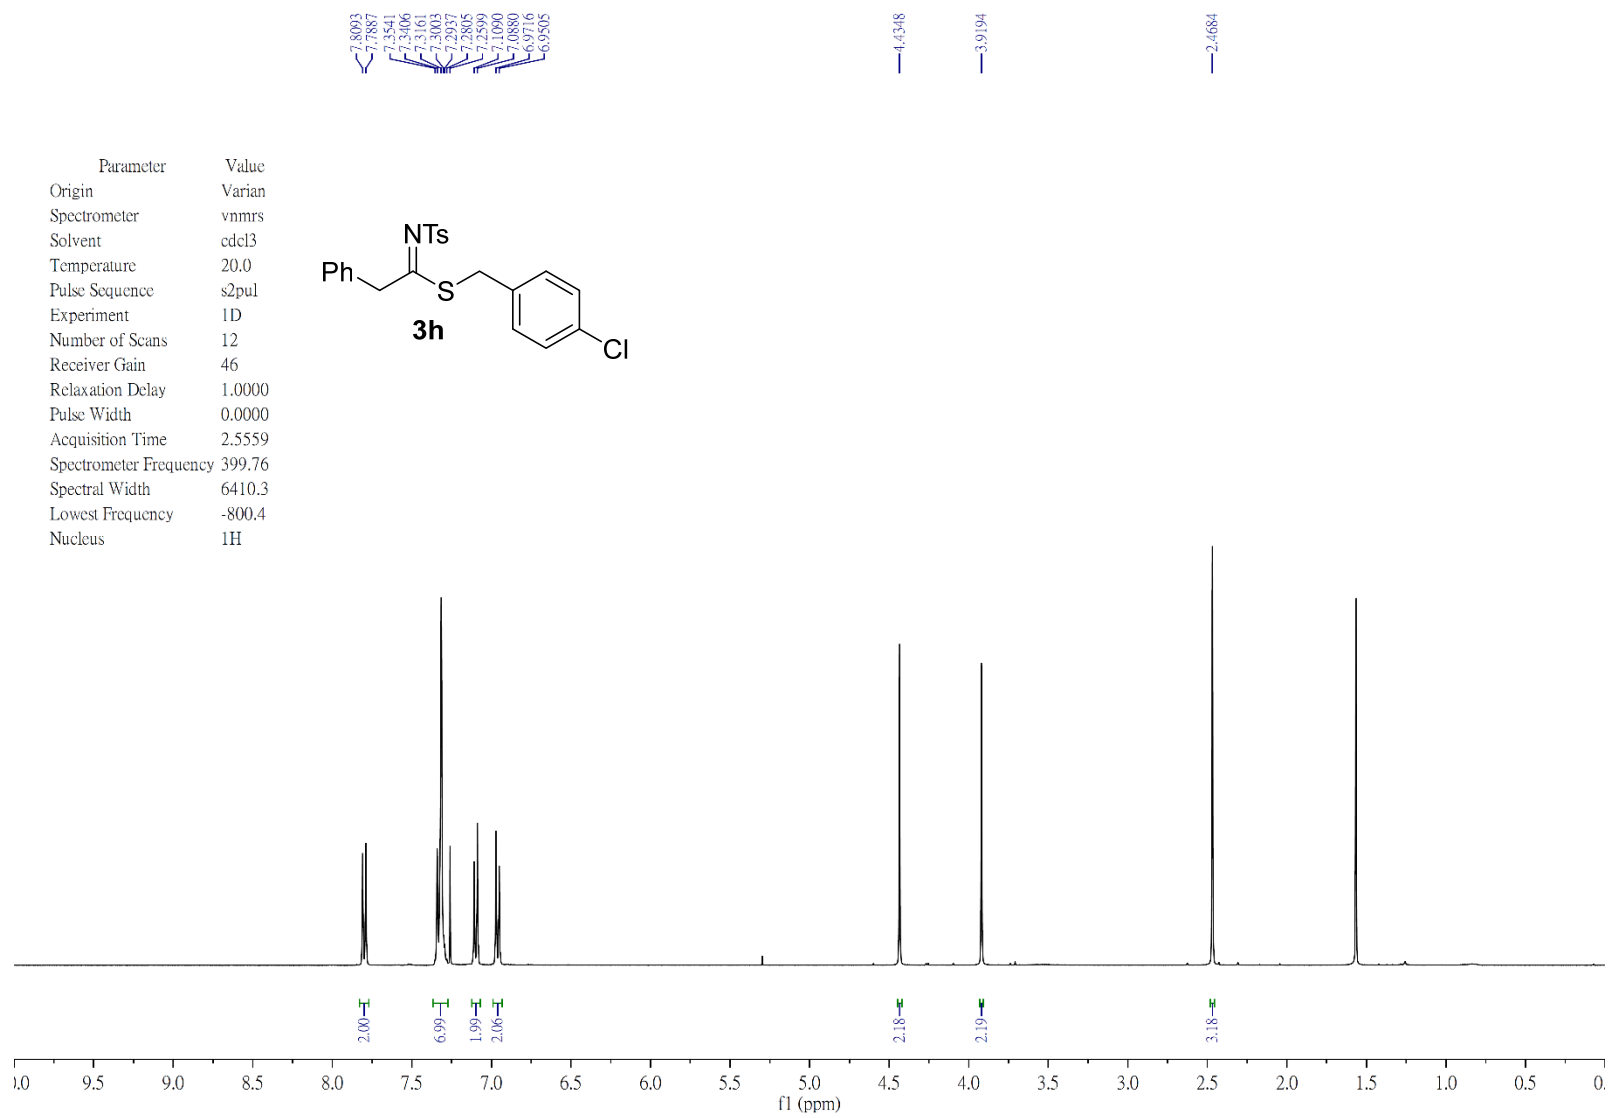

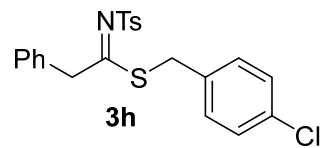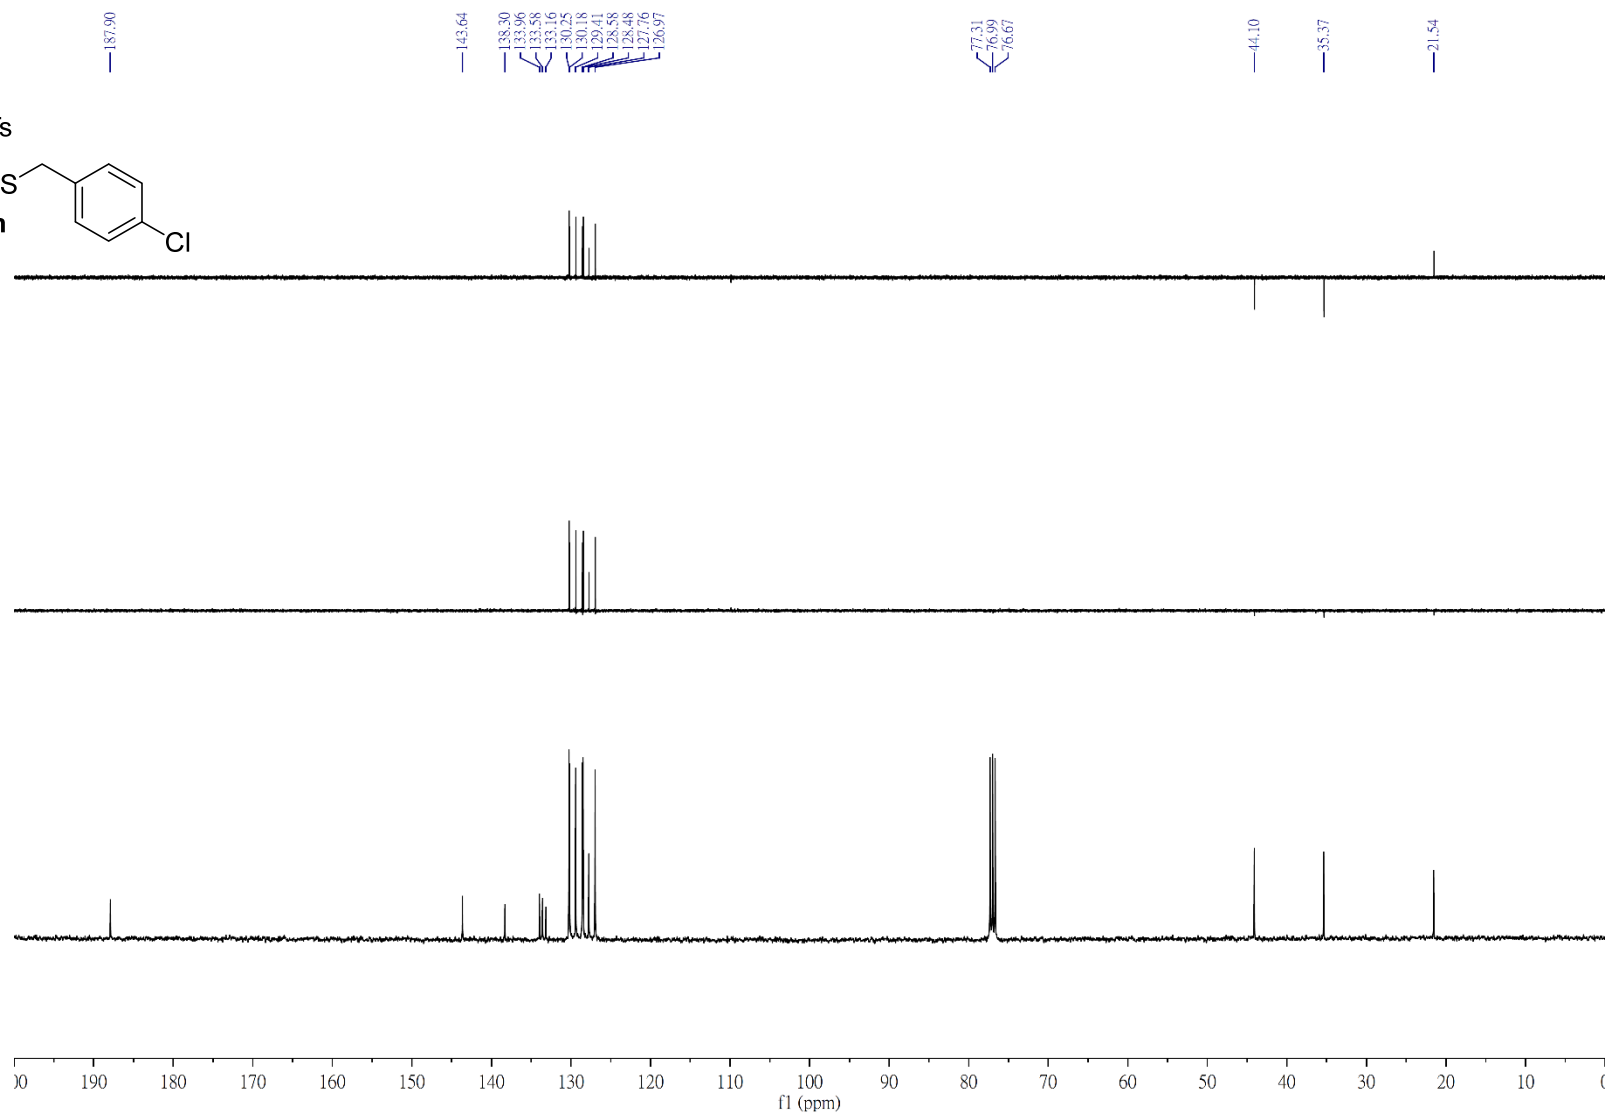



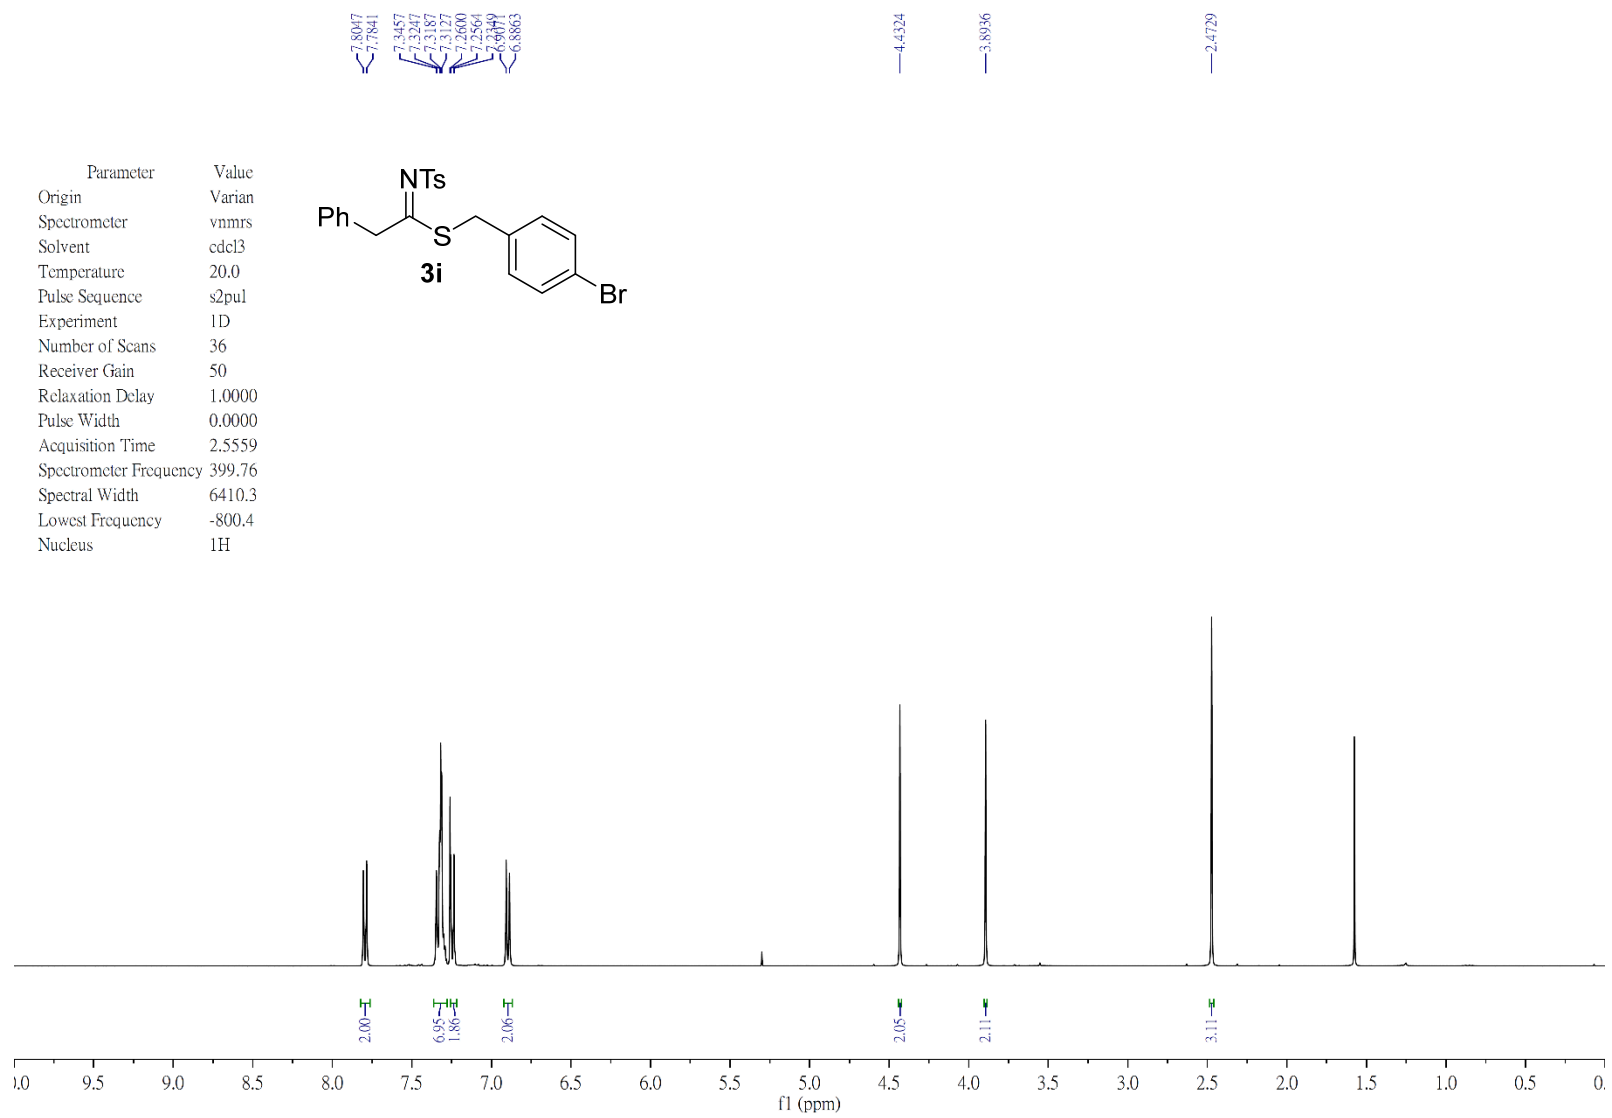

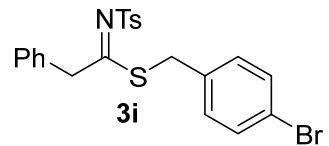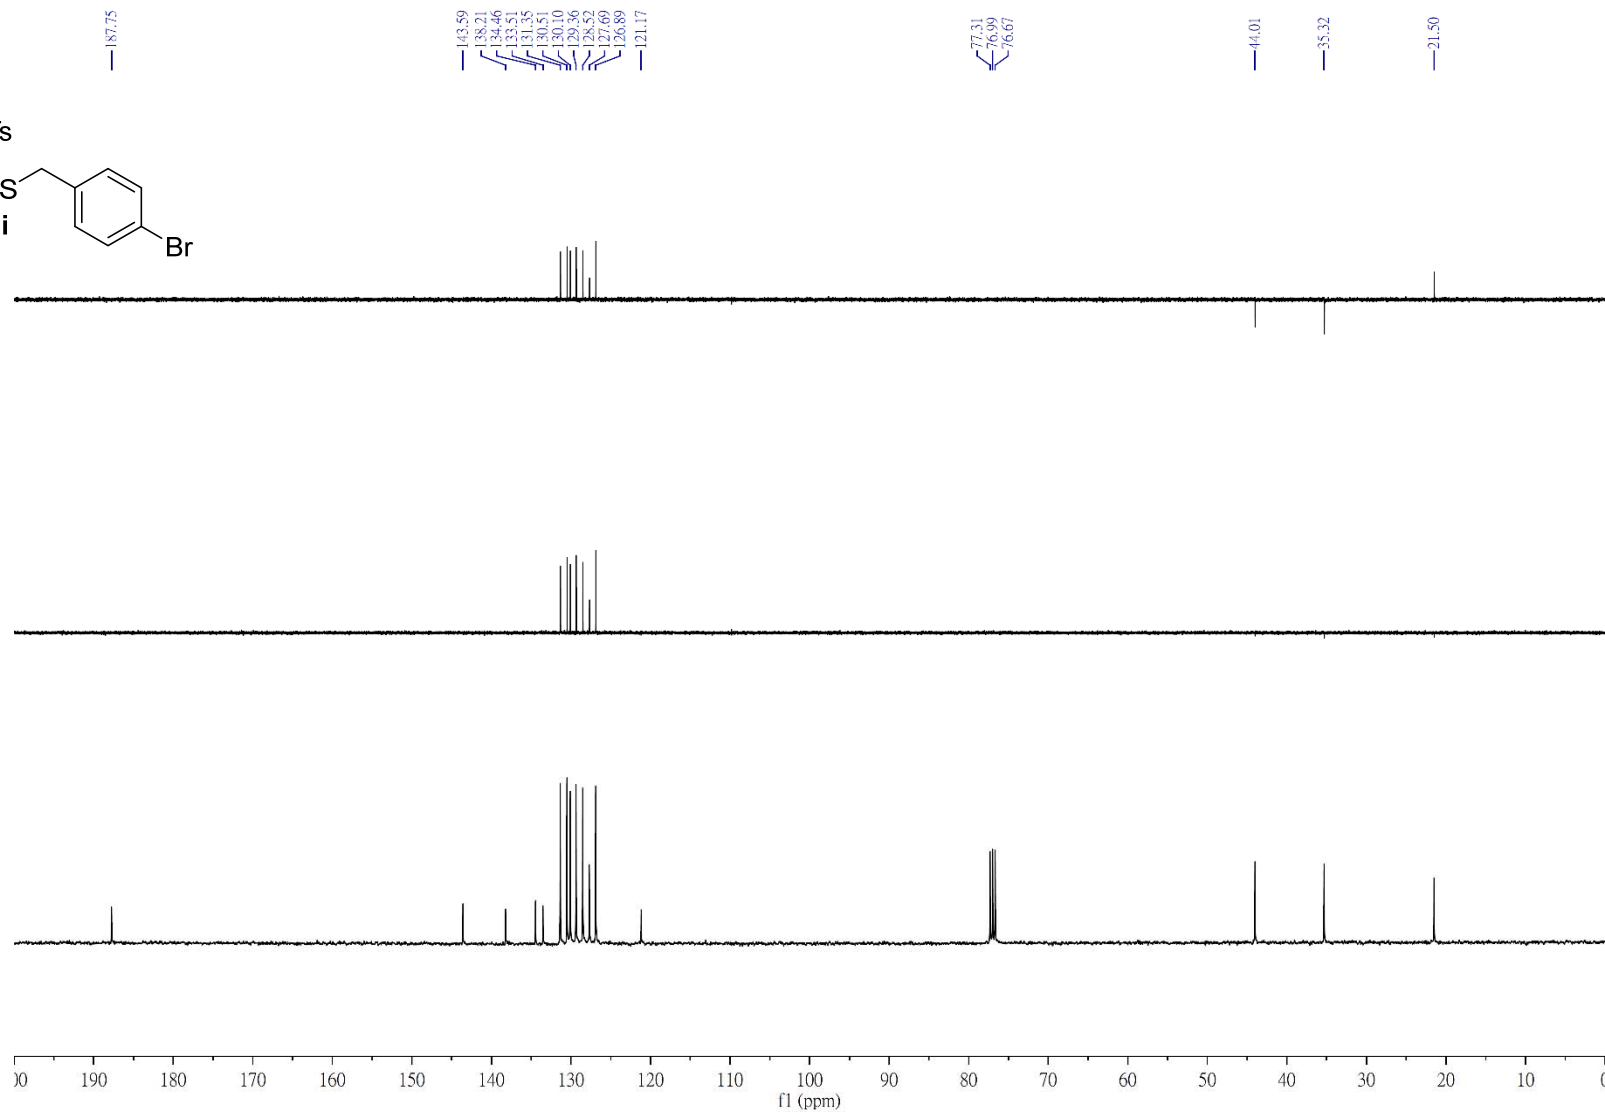

| Parameter              | Value          |
|------------------------|----------------|
| Origin                 | Varian         |
| Spectrometer           | vnmrs          |
| Solvent                | cdcl3          |
| Temperature            | 20.0           |
| Pulse Sequence         | s2pul          |
| Experiment             | 1D             |
| Number of Scans        | 28             |
| Receiver Gain          | 52             |
| Relaxation Delay       | 1.0000         |
| Pulse Width            | 0.0000         |
| Acquisition Time       | 2.5559         |
| Spectrometer Frequency | 399.76         |
| Spectral Width         | 6410.3         |
| Lowest Frequency       | -799.4         |
| Nucleus                | <sup>1</sup> H |

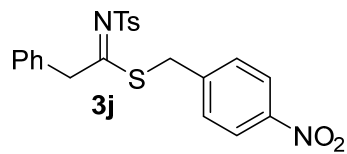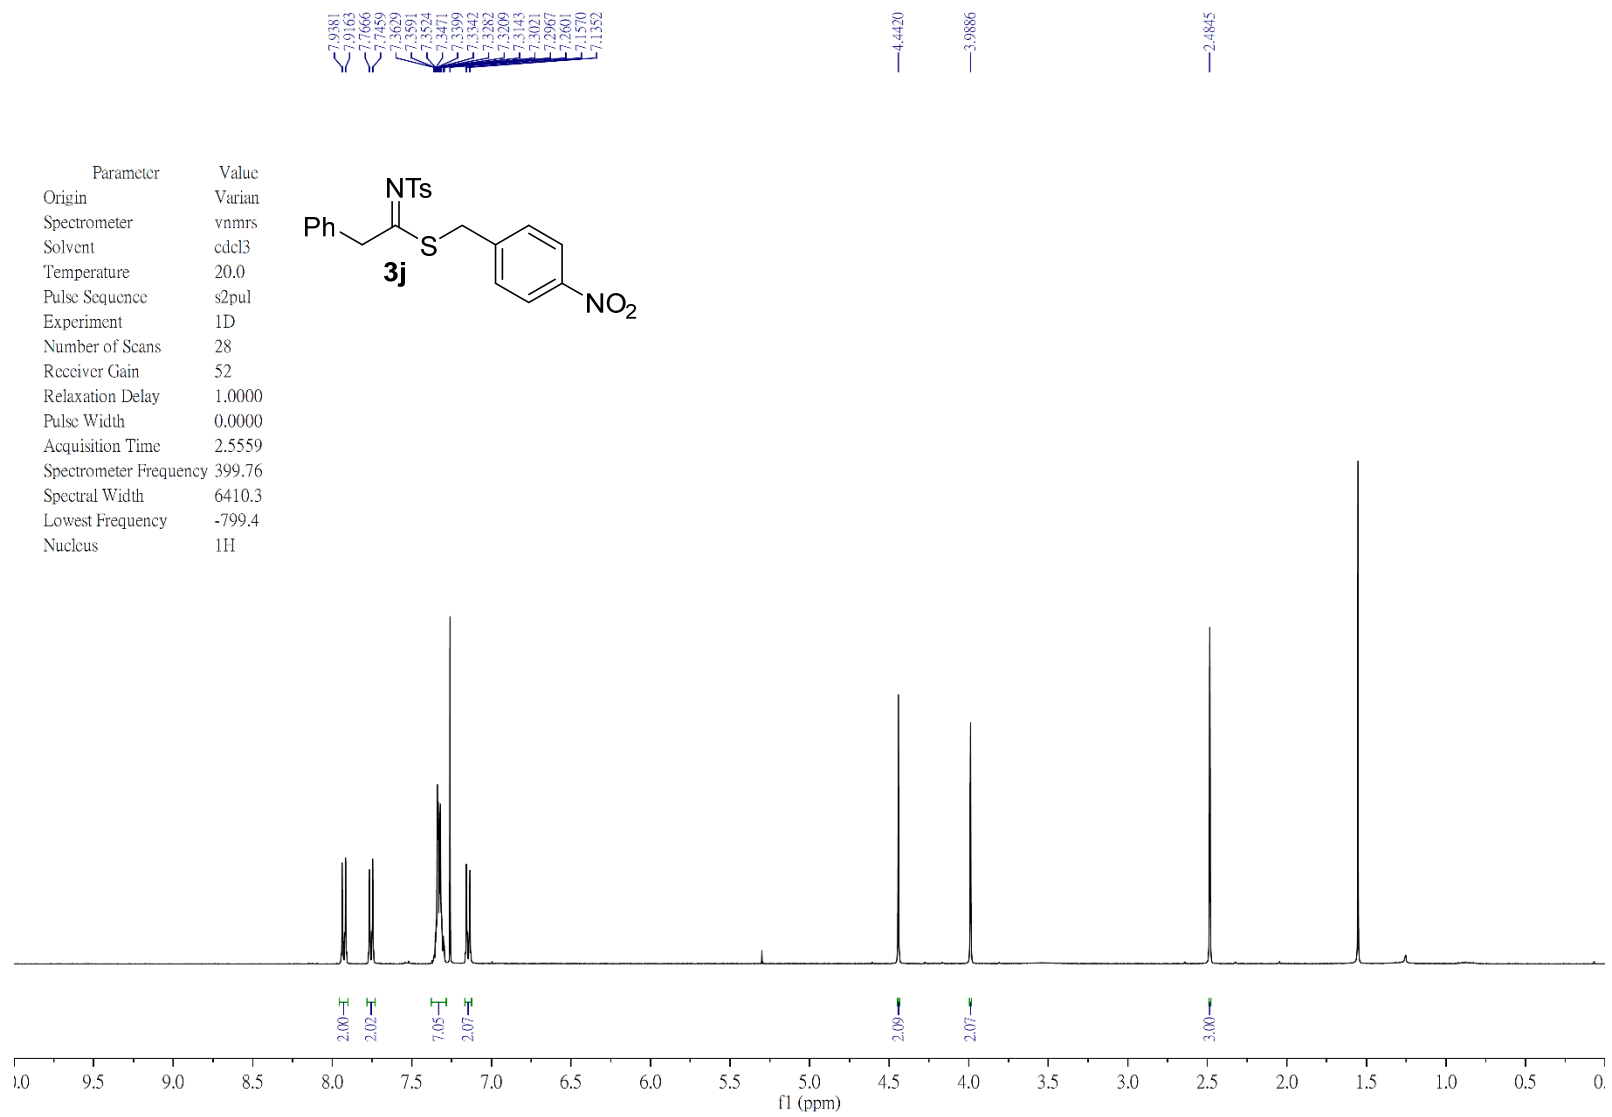

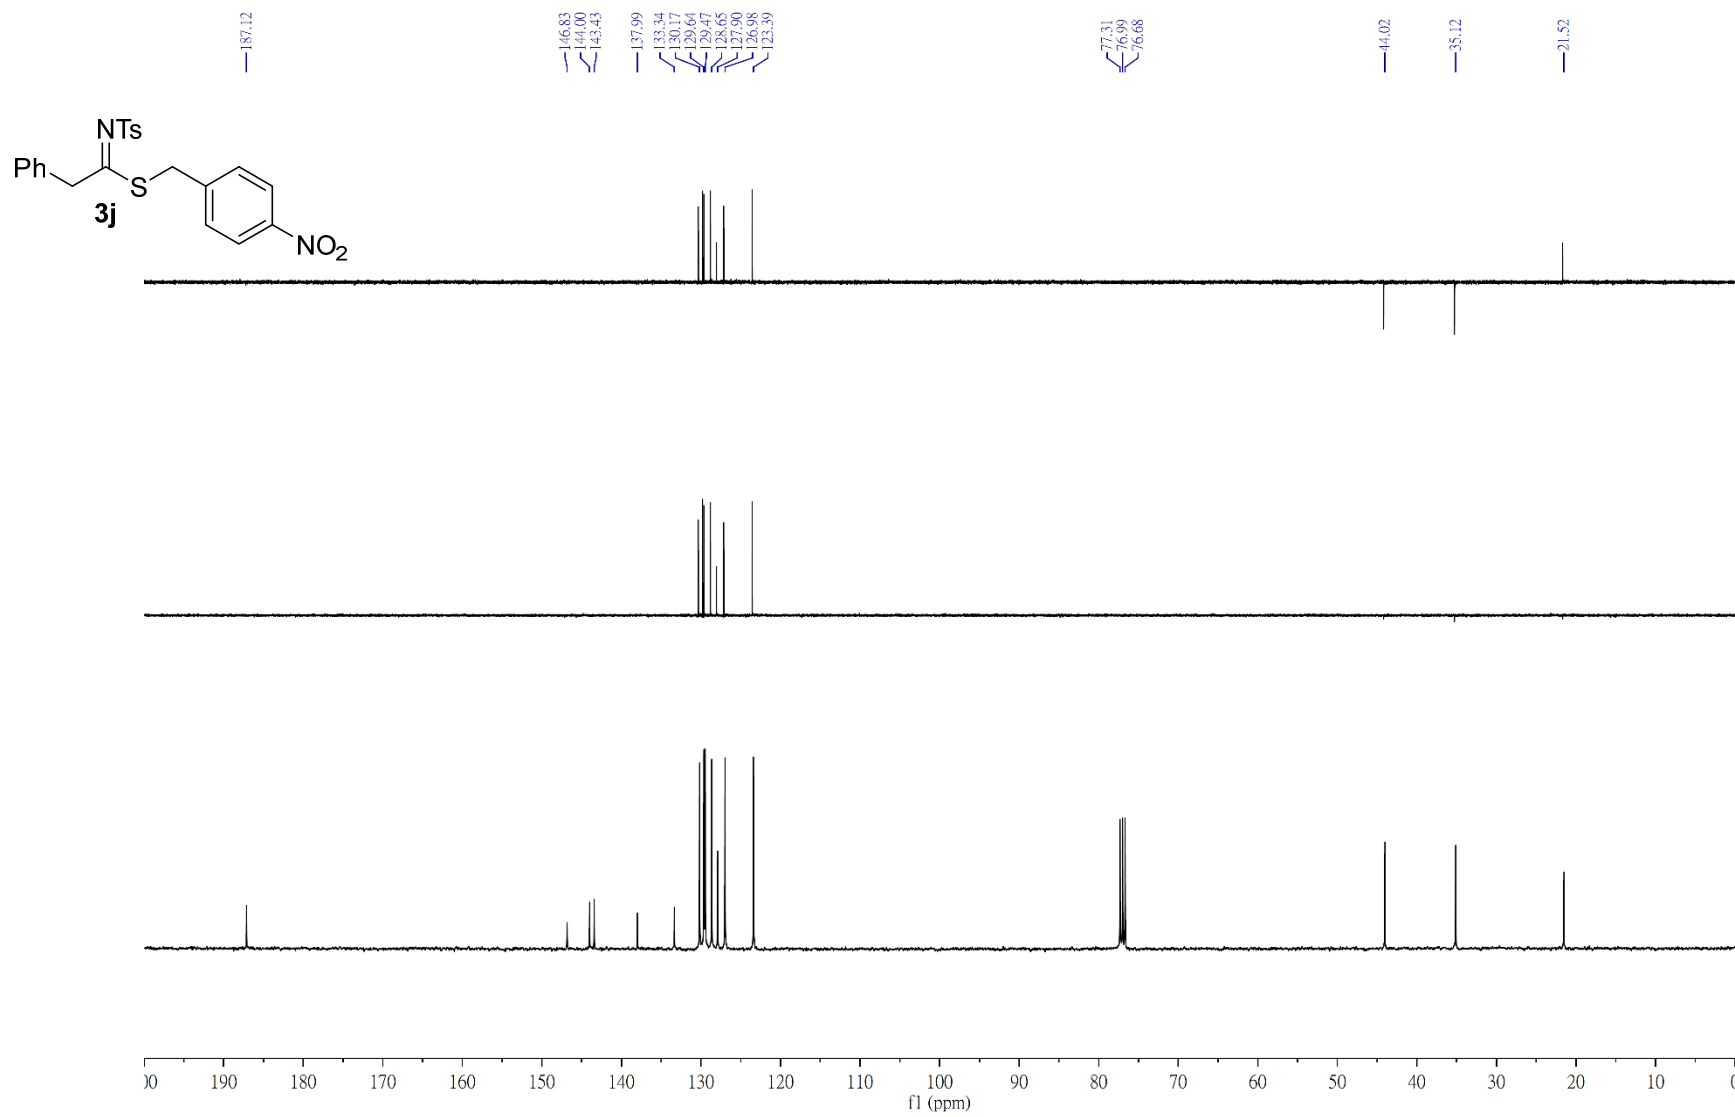

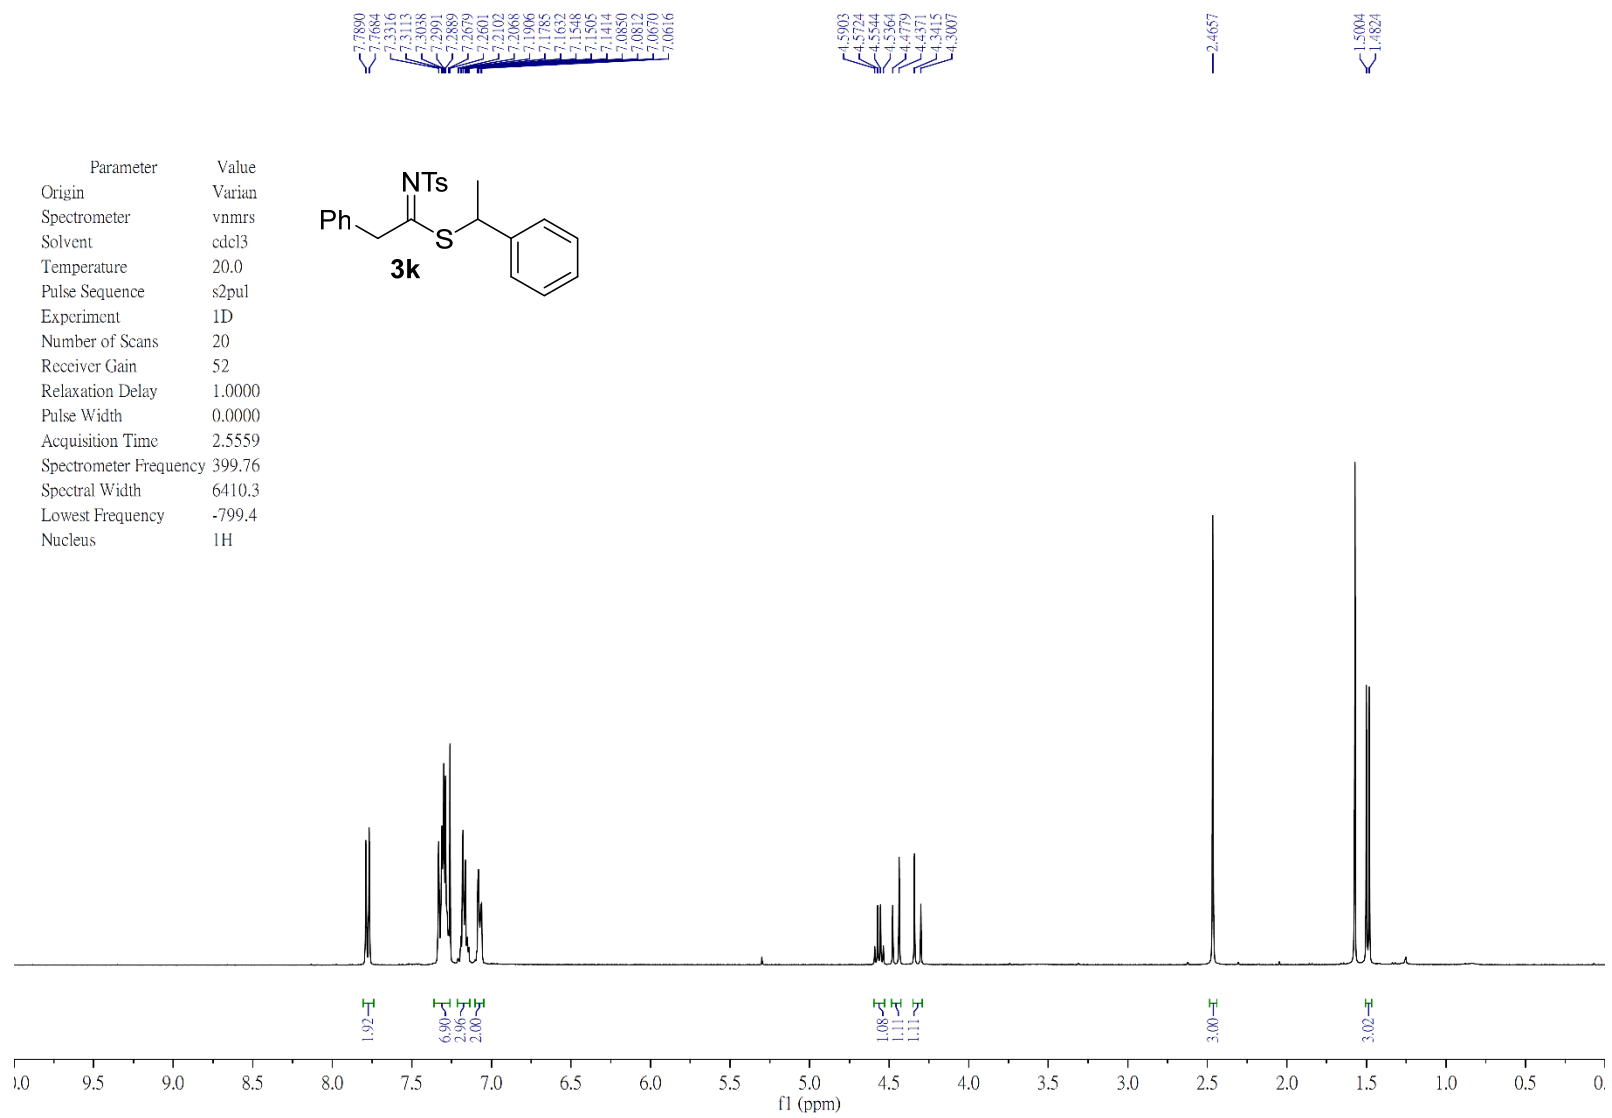

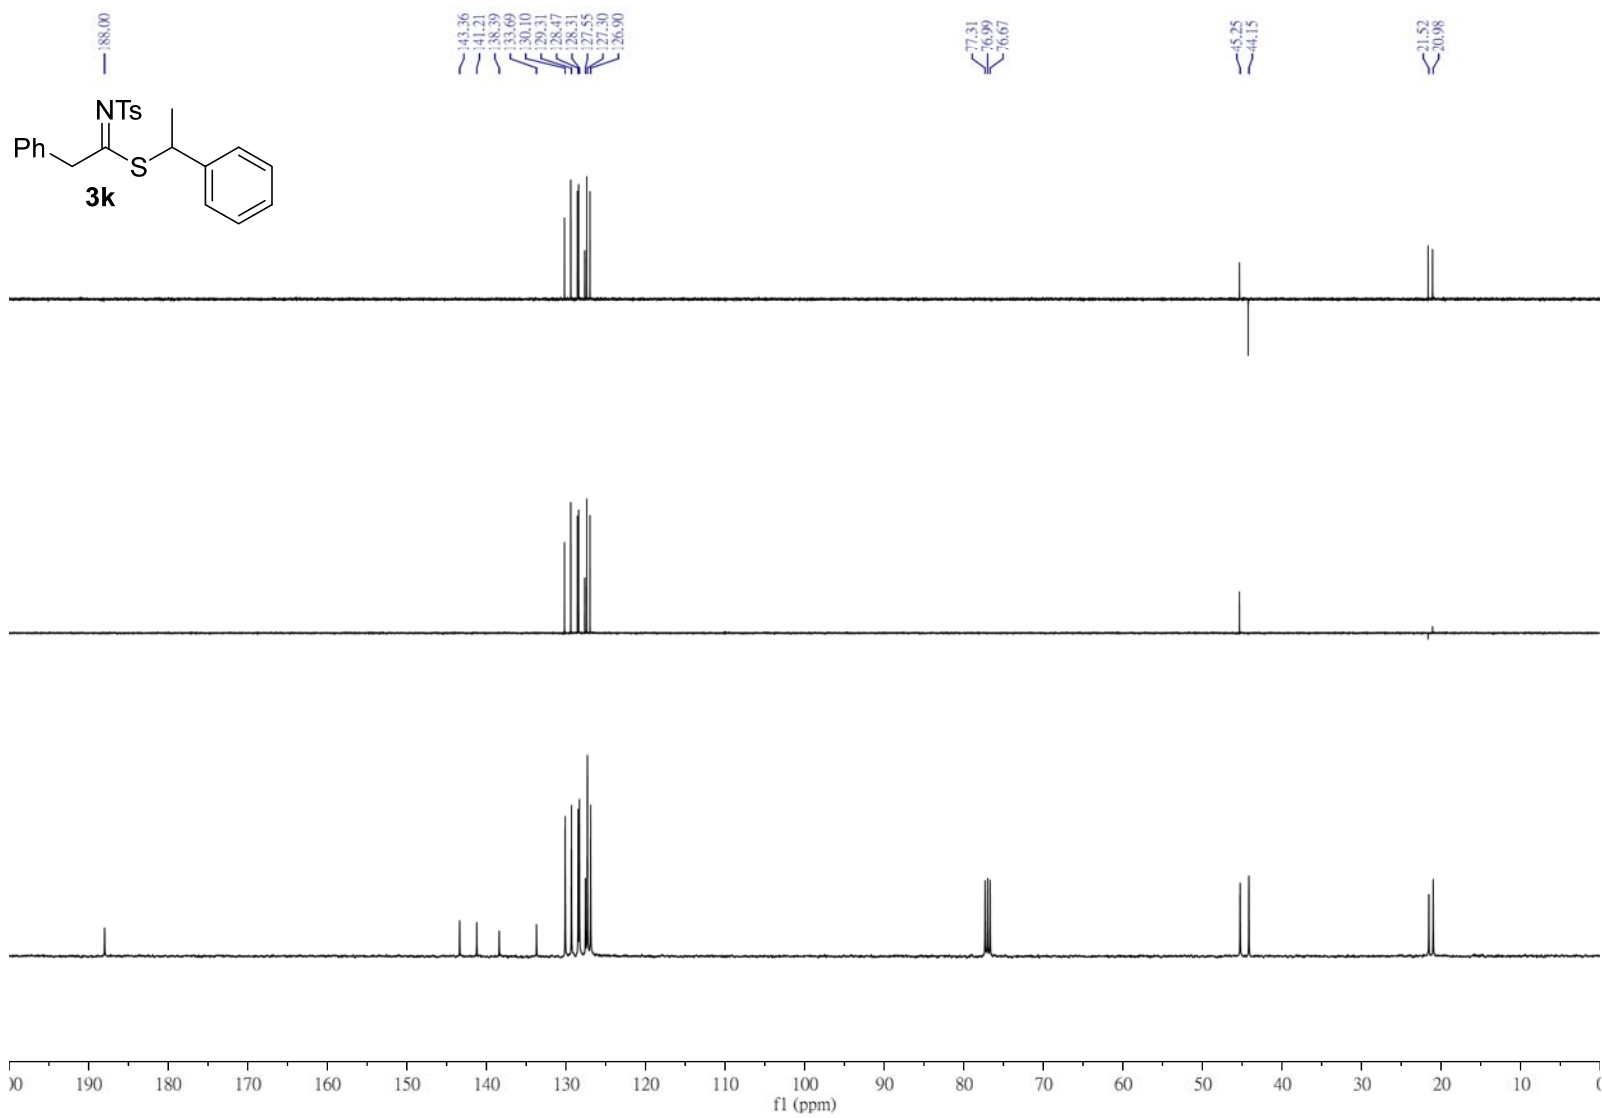

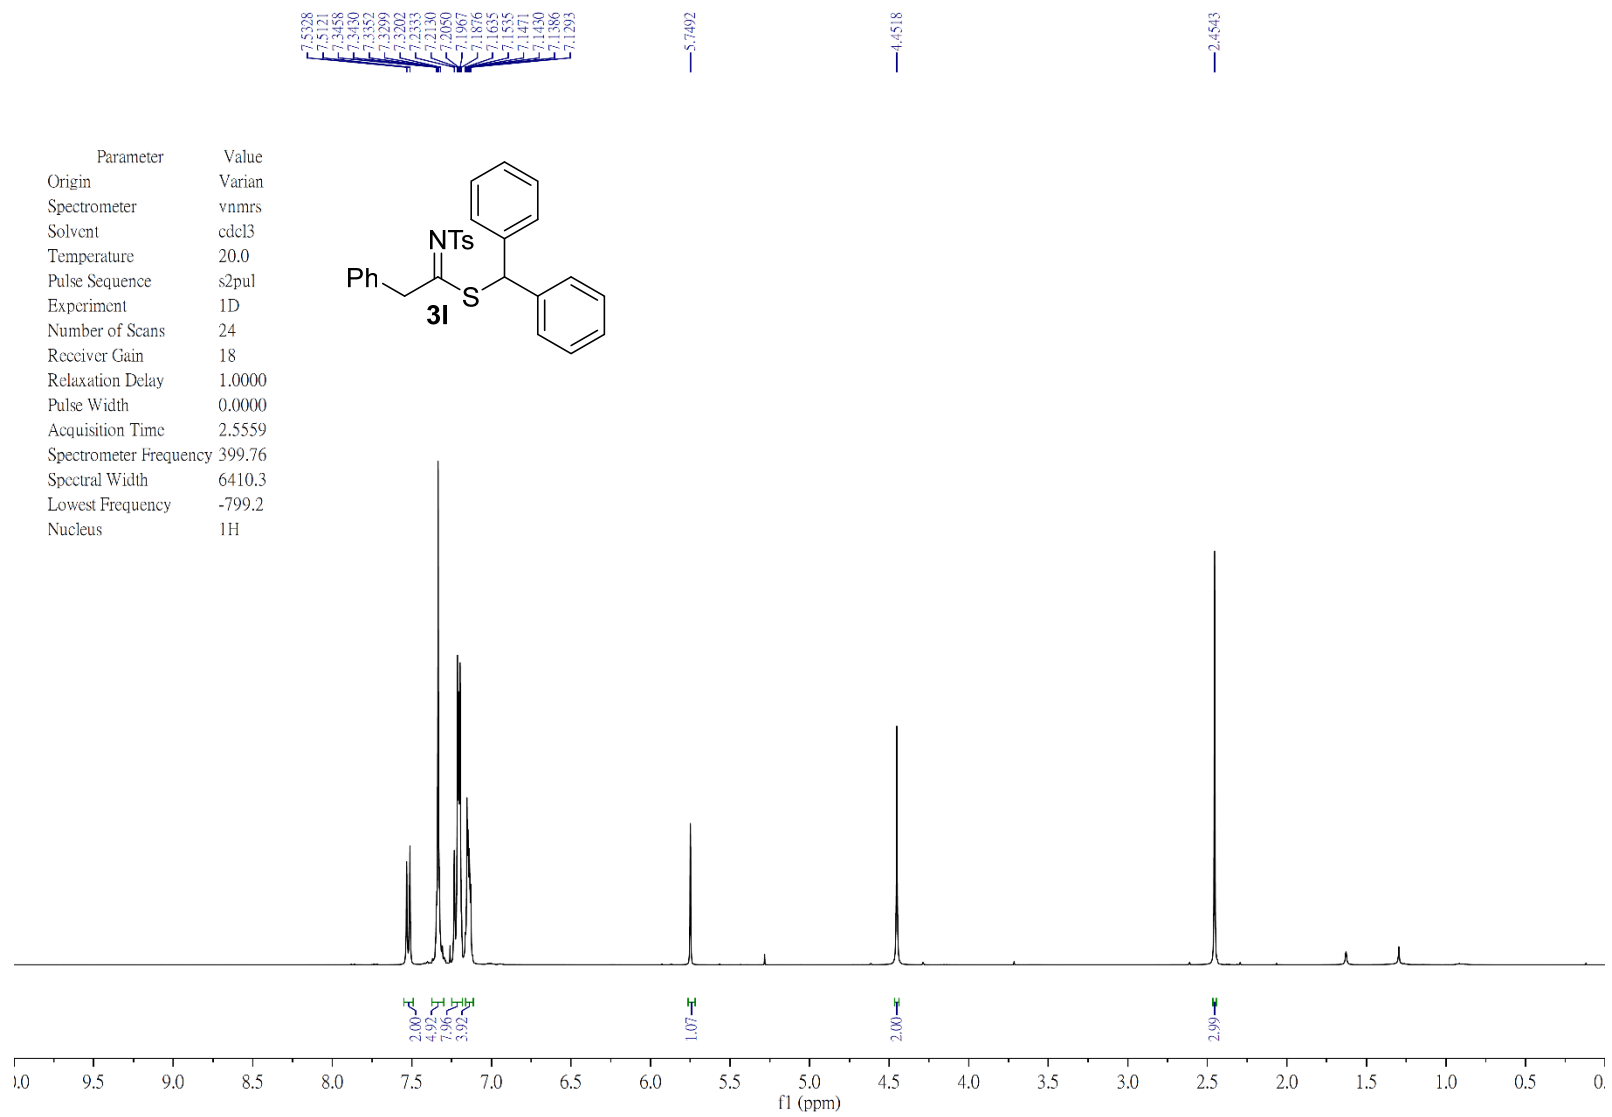

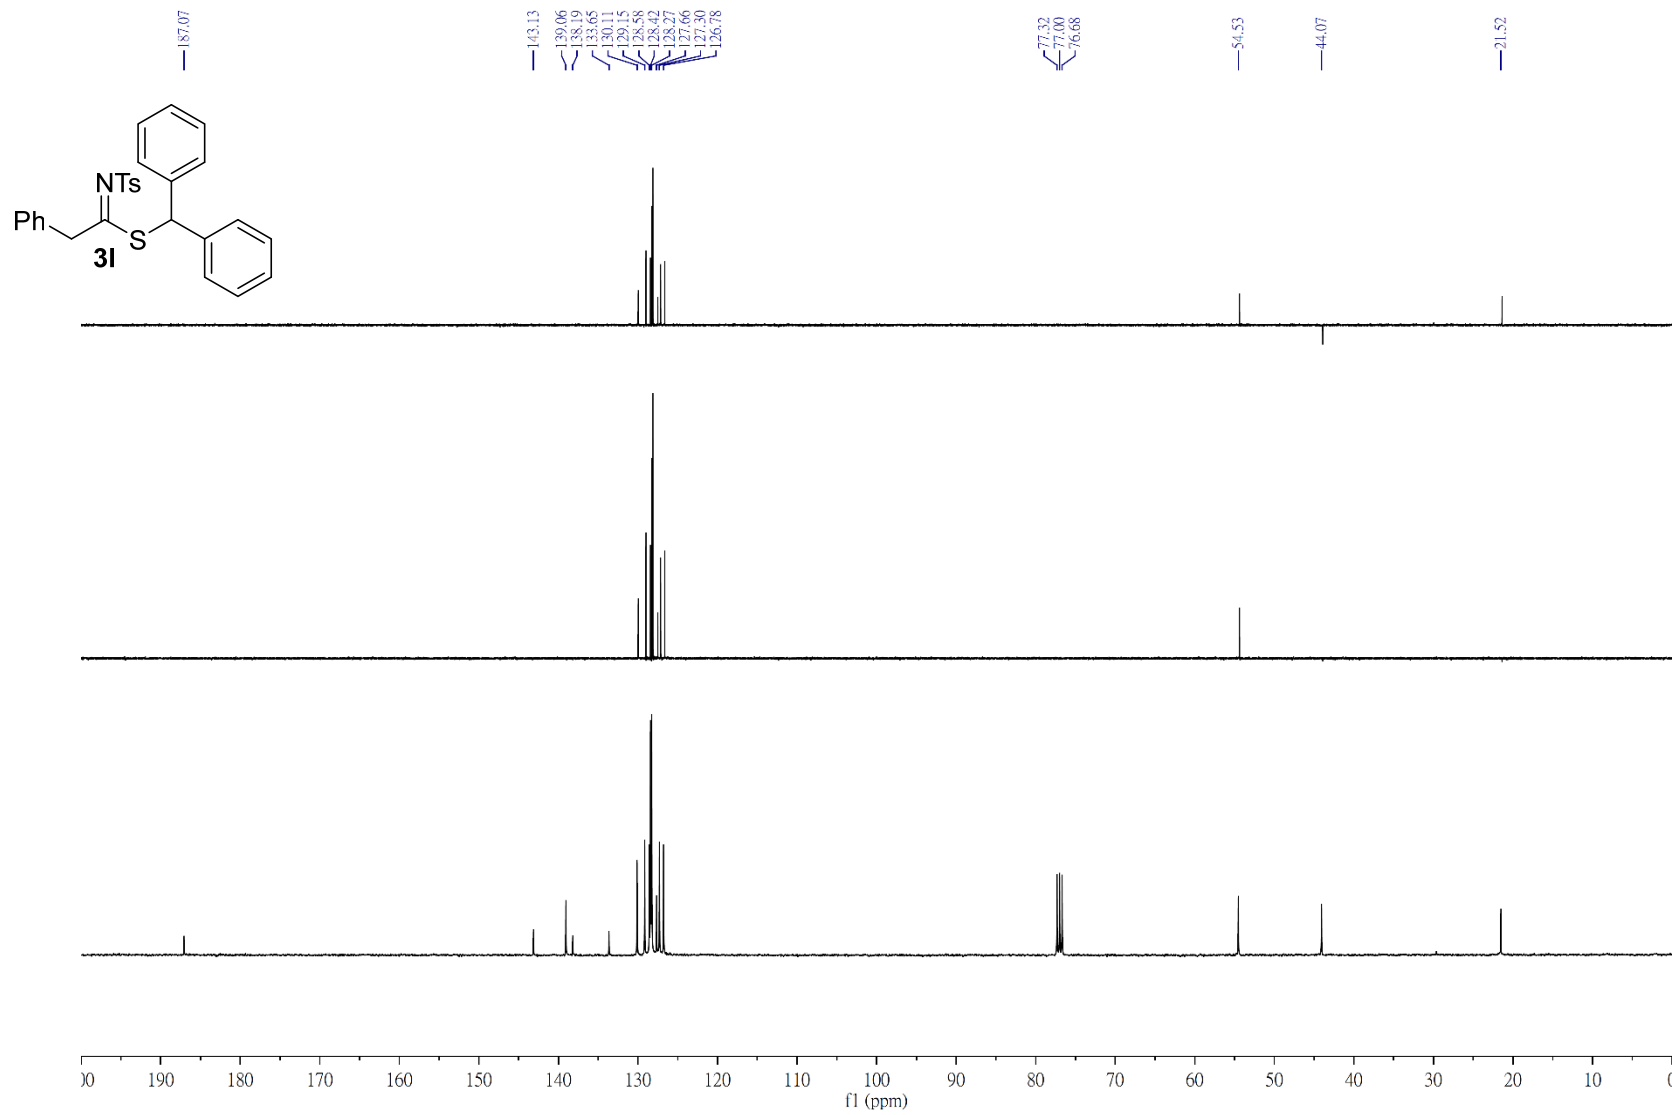



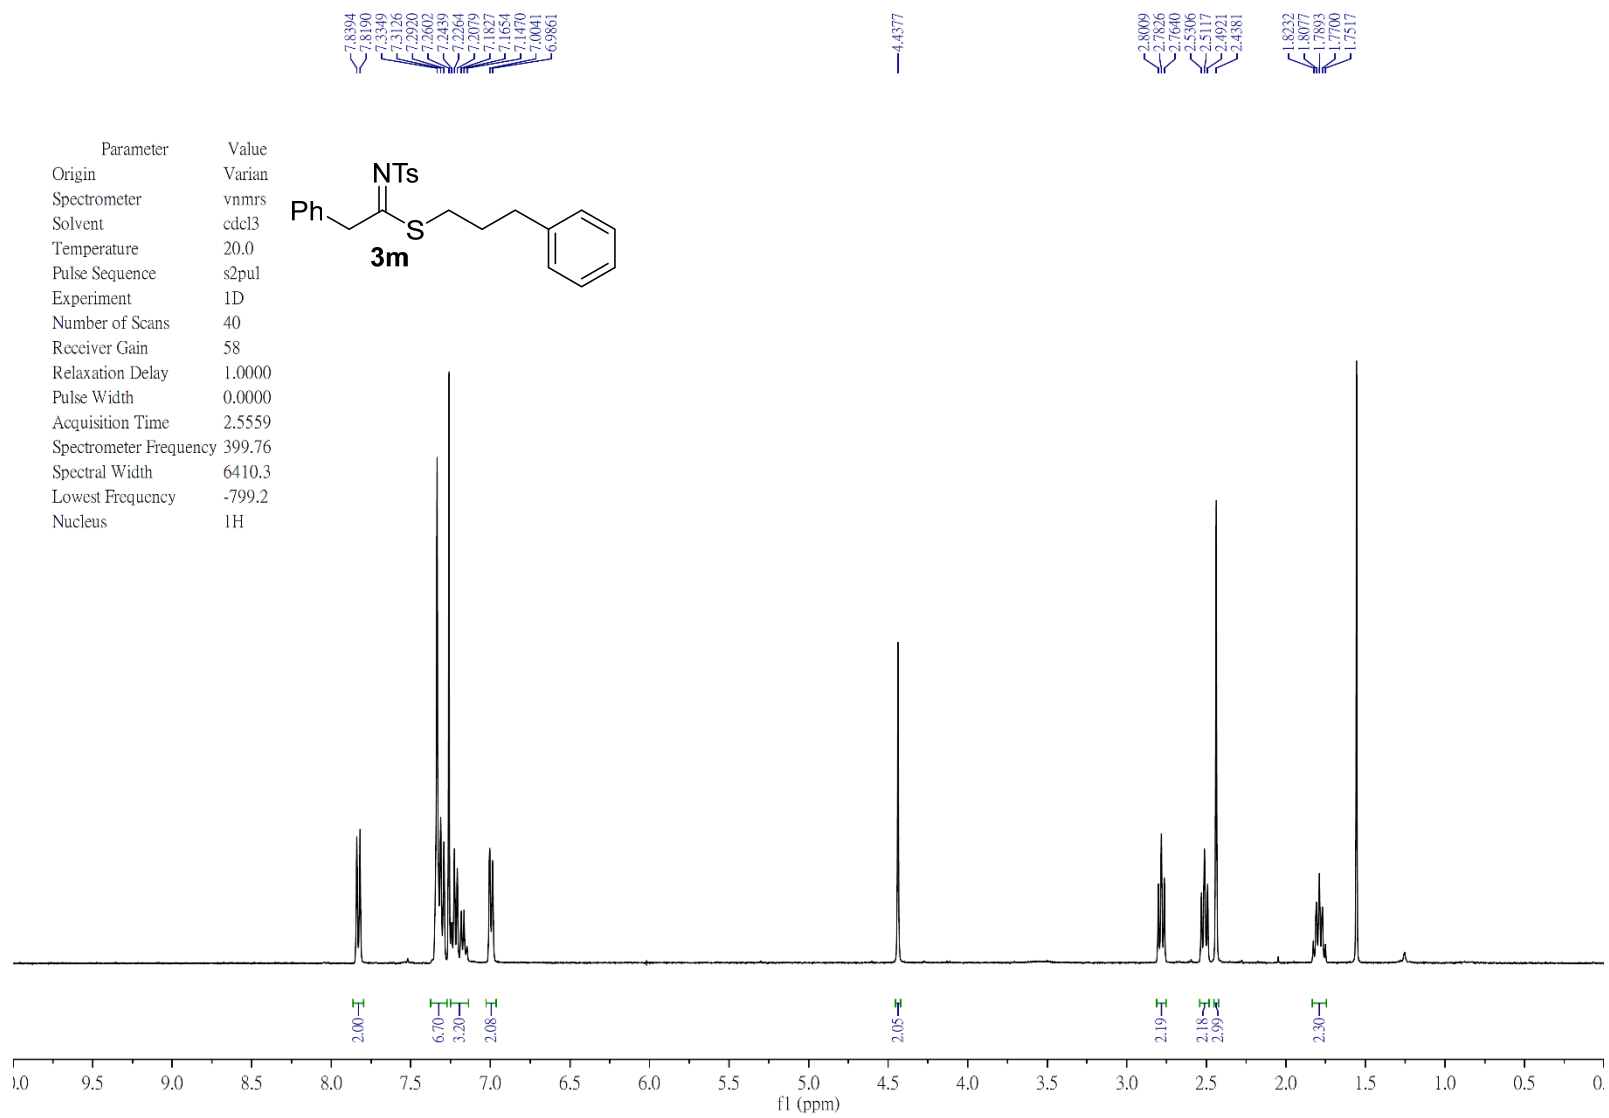

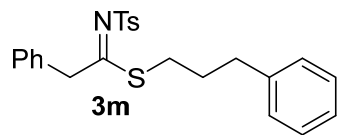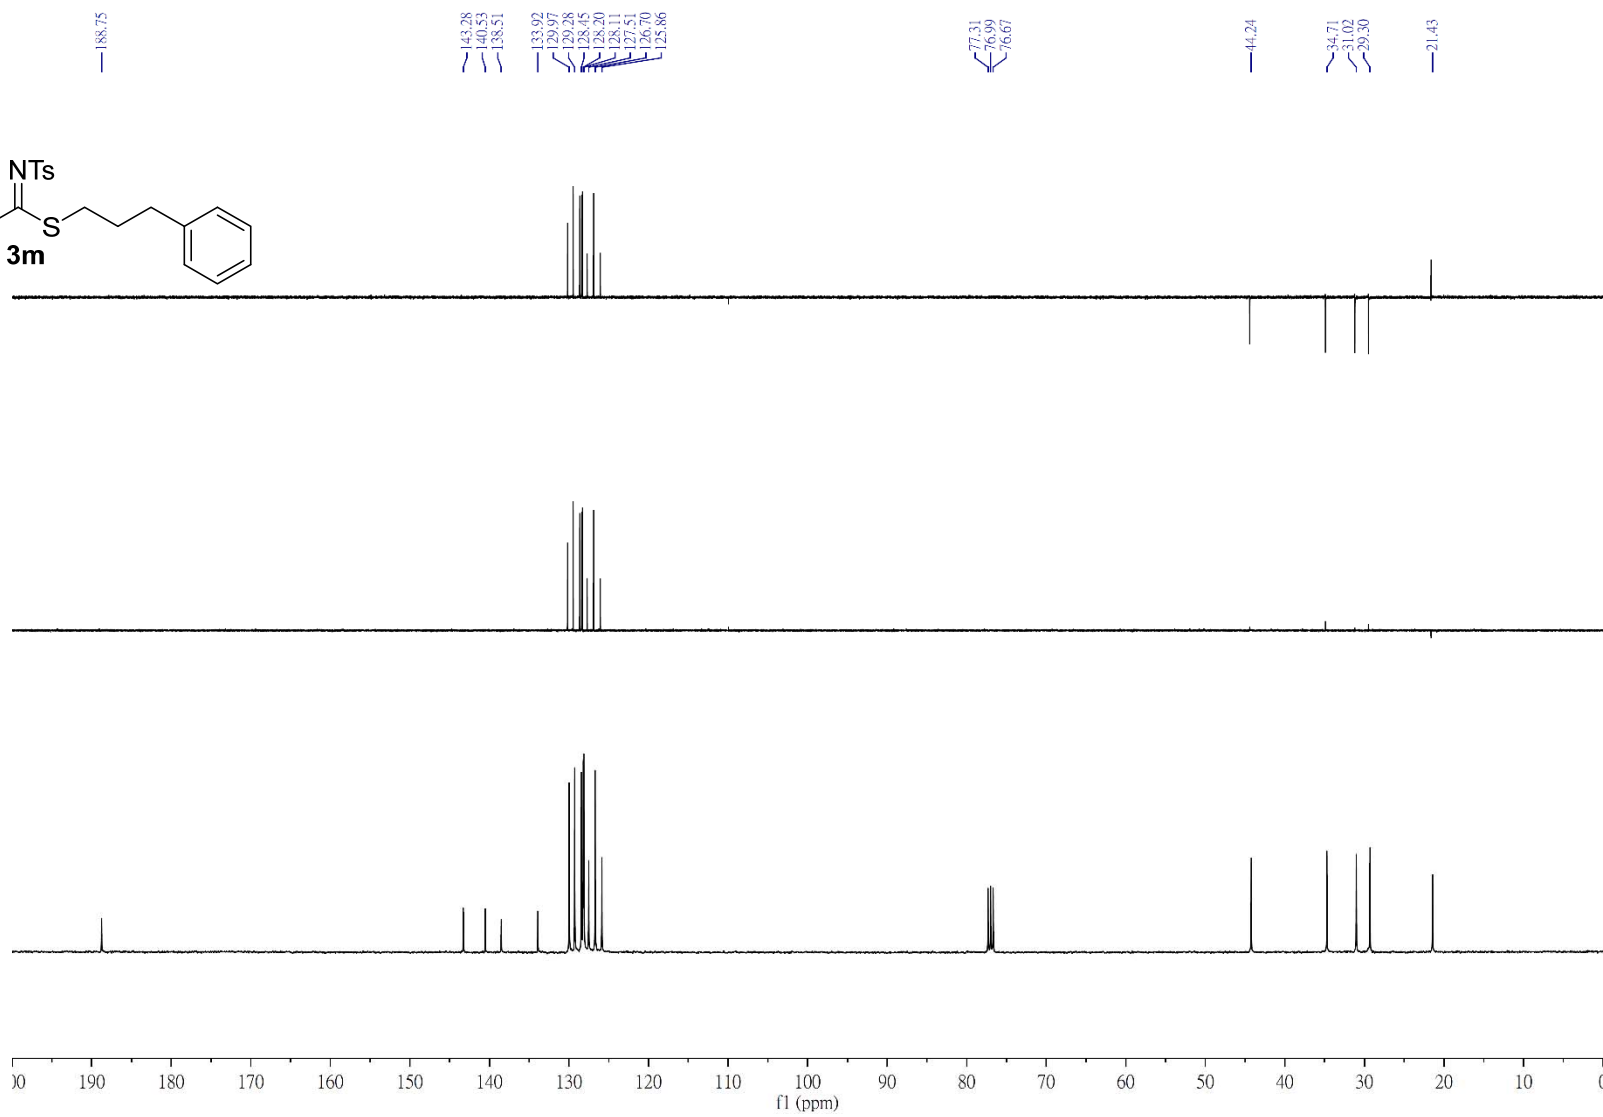

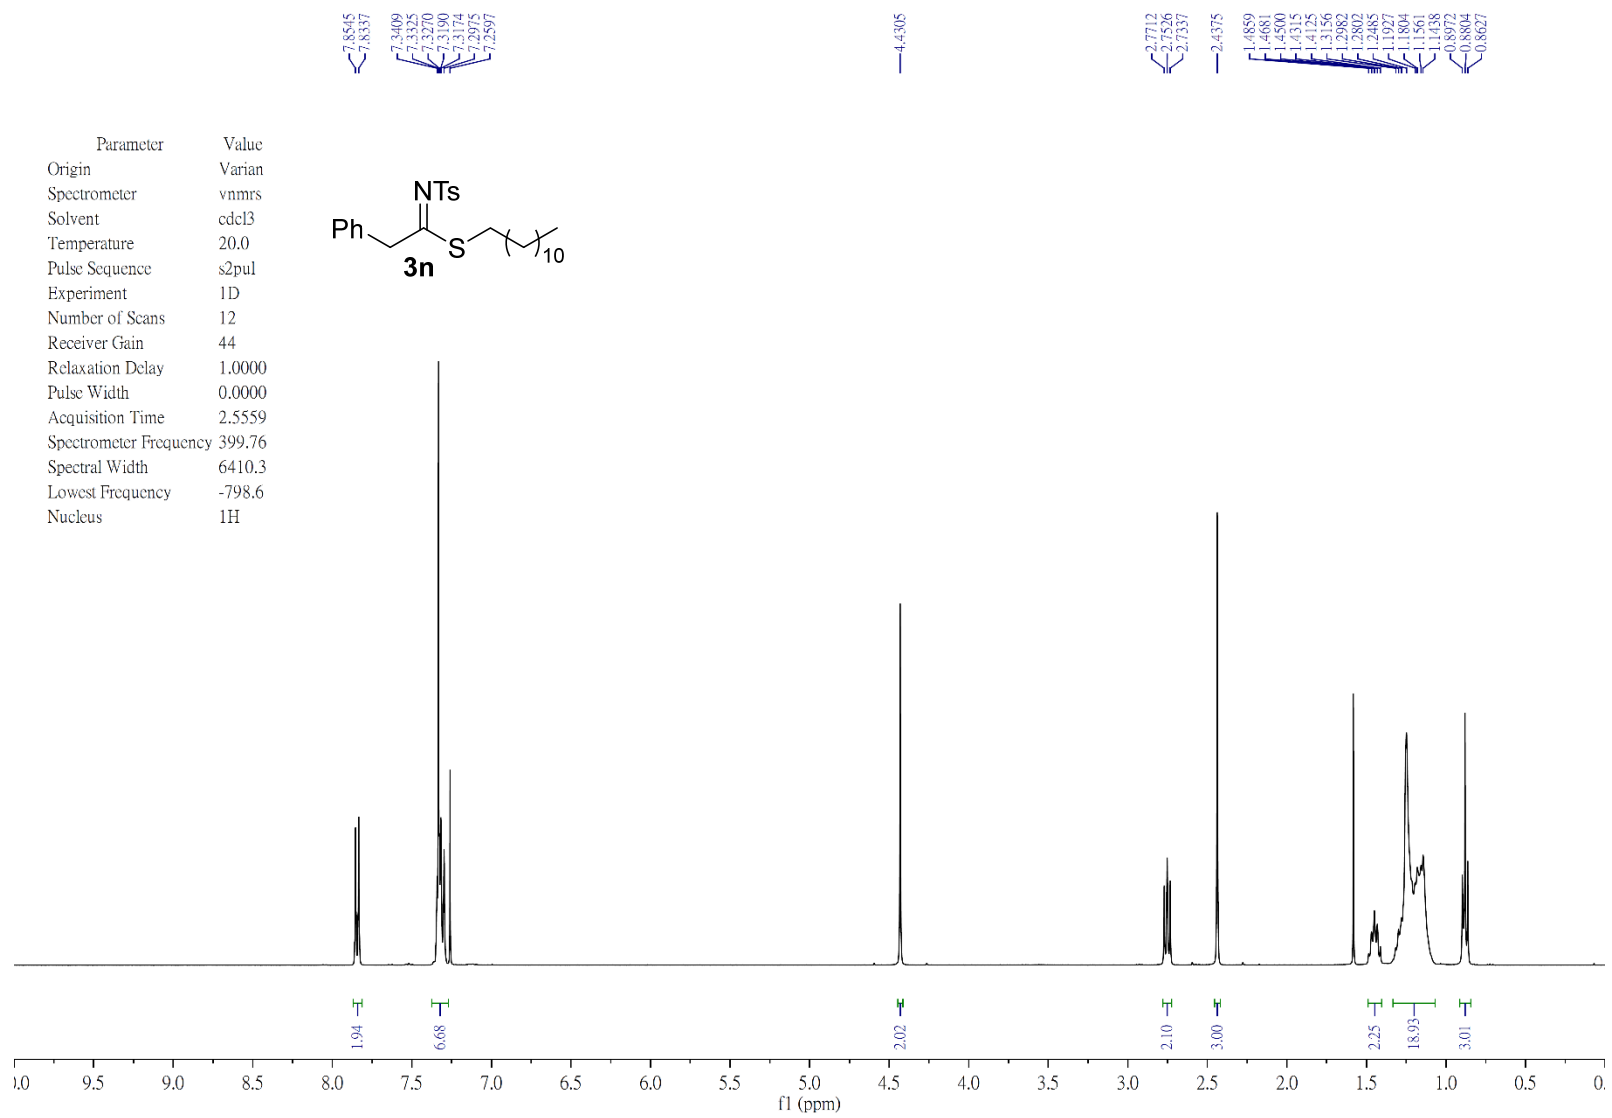

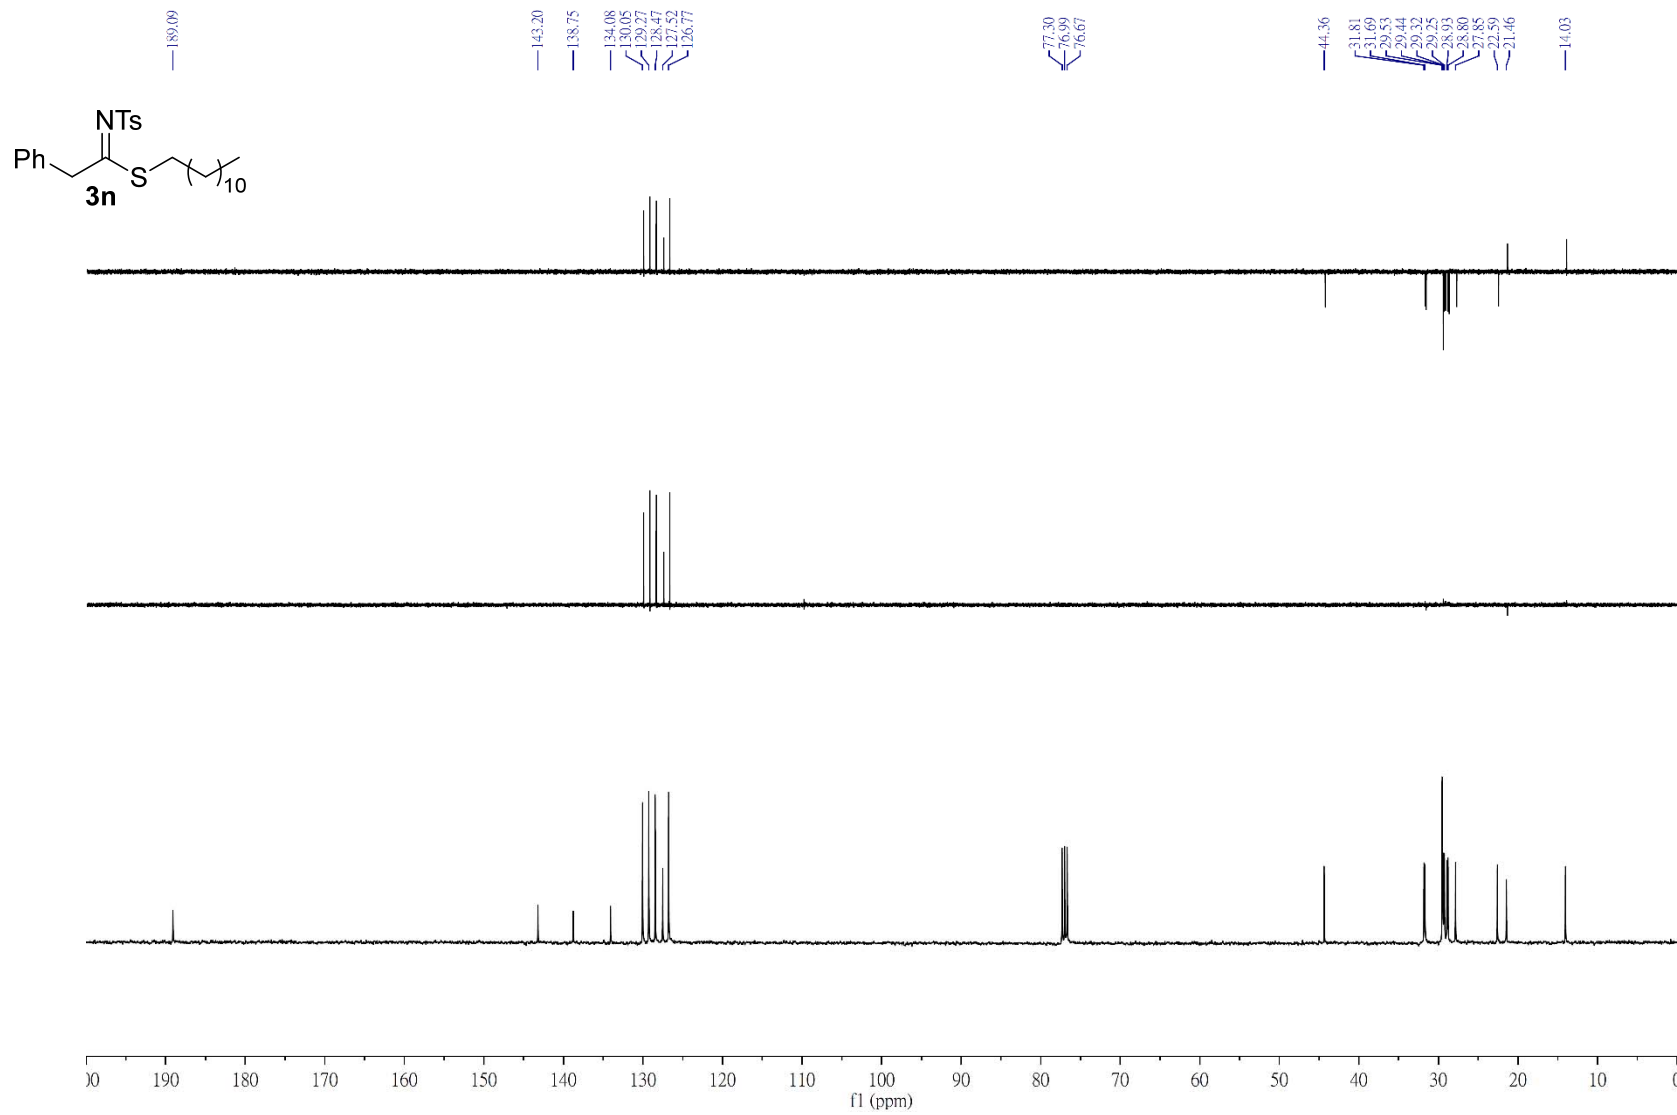

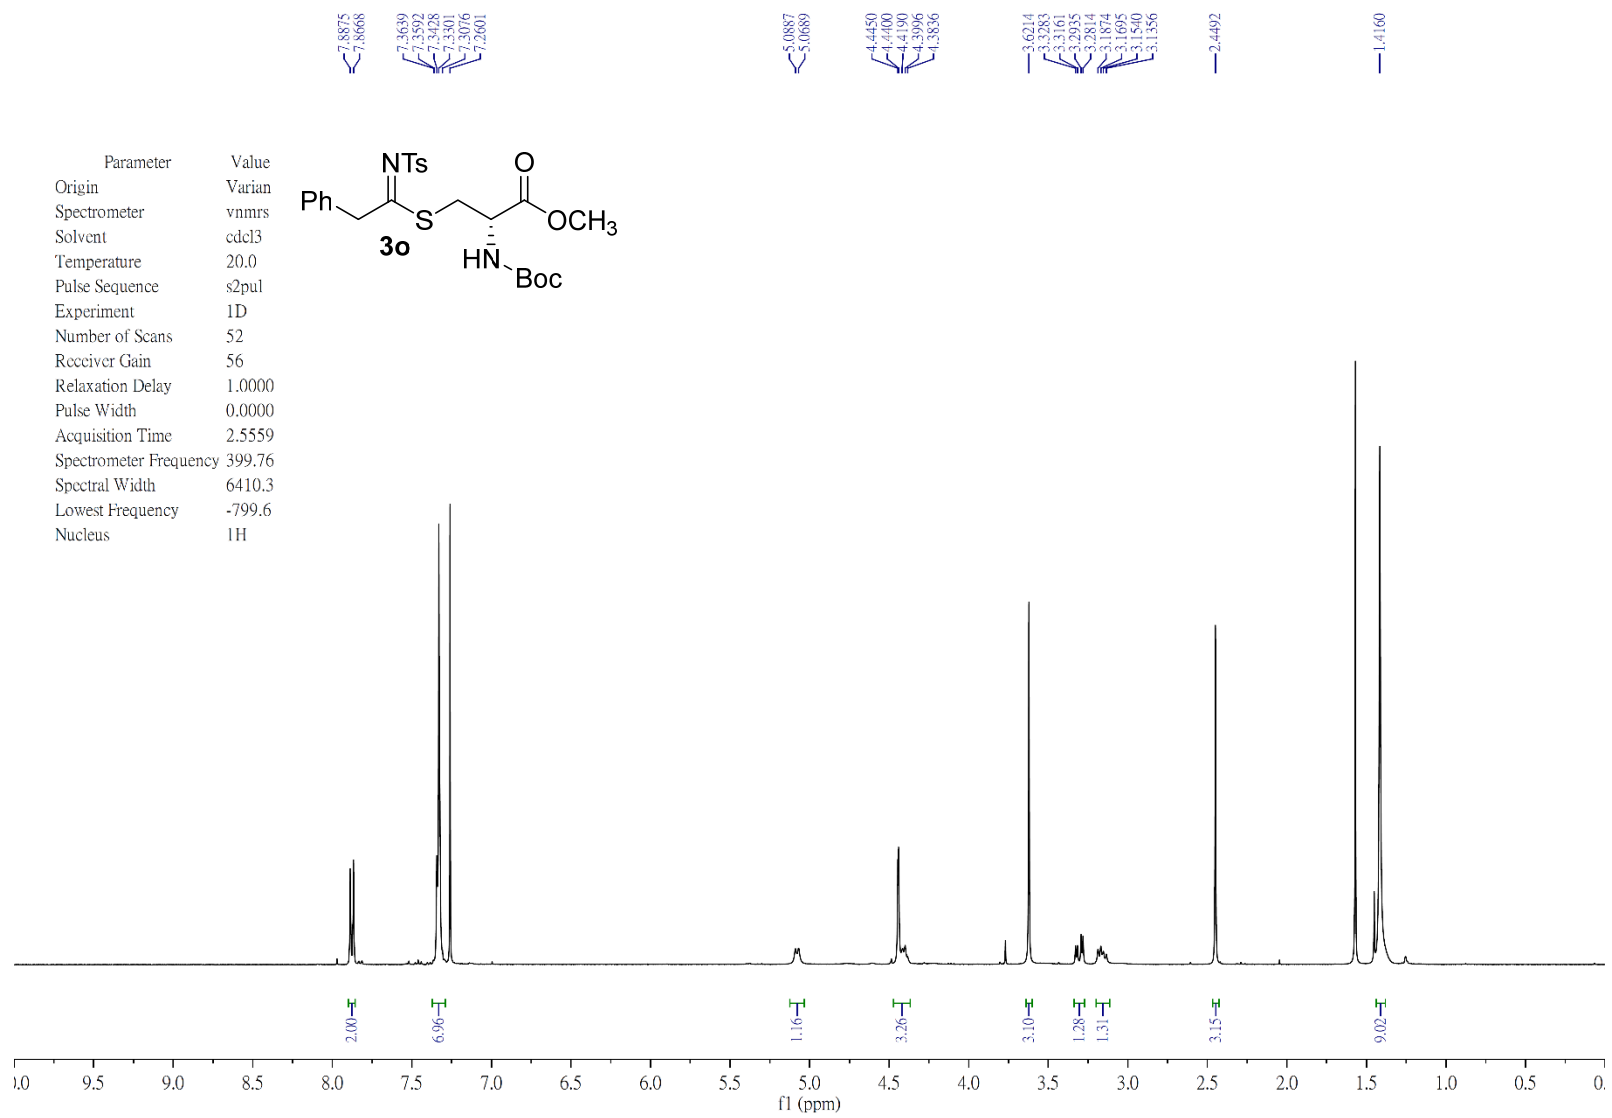

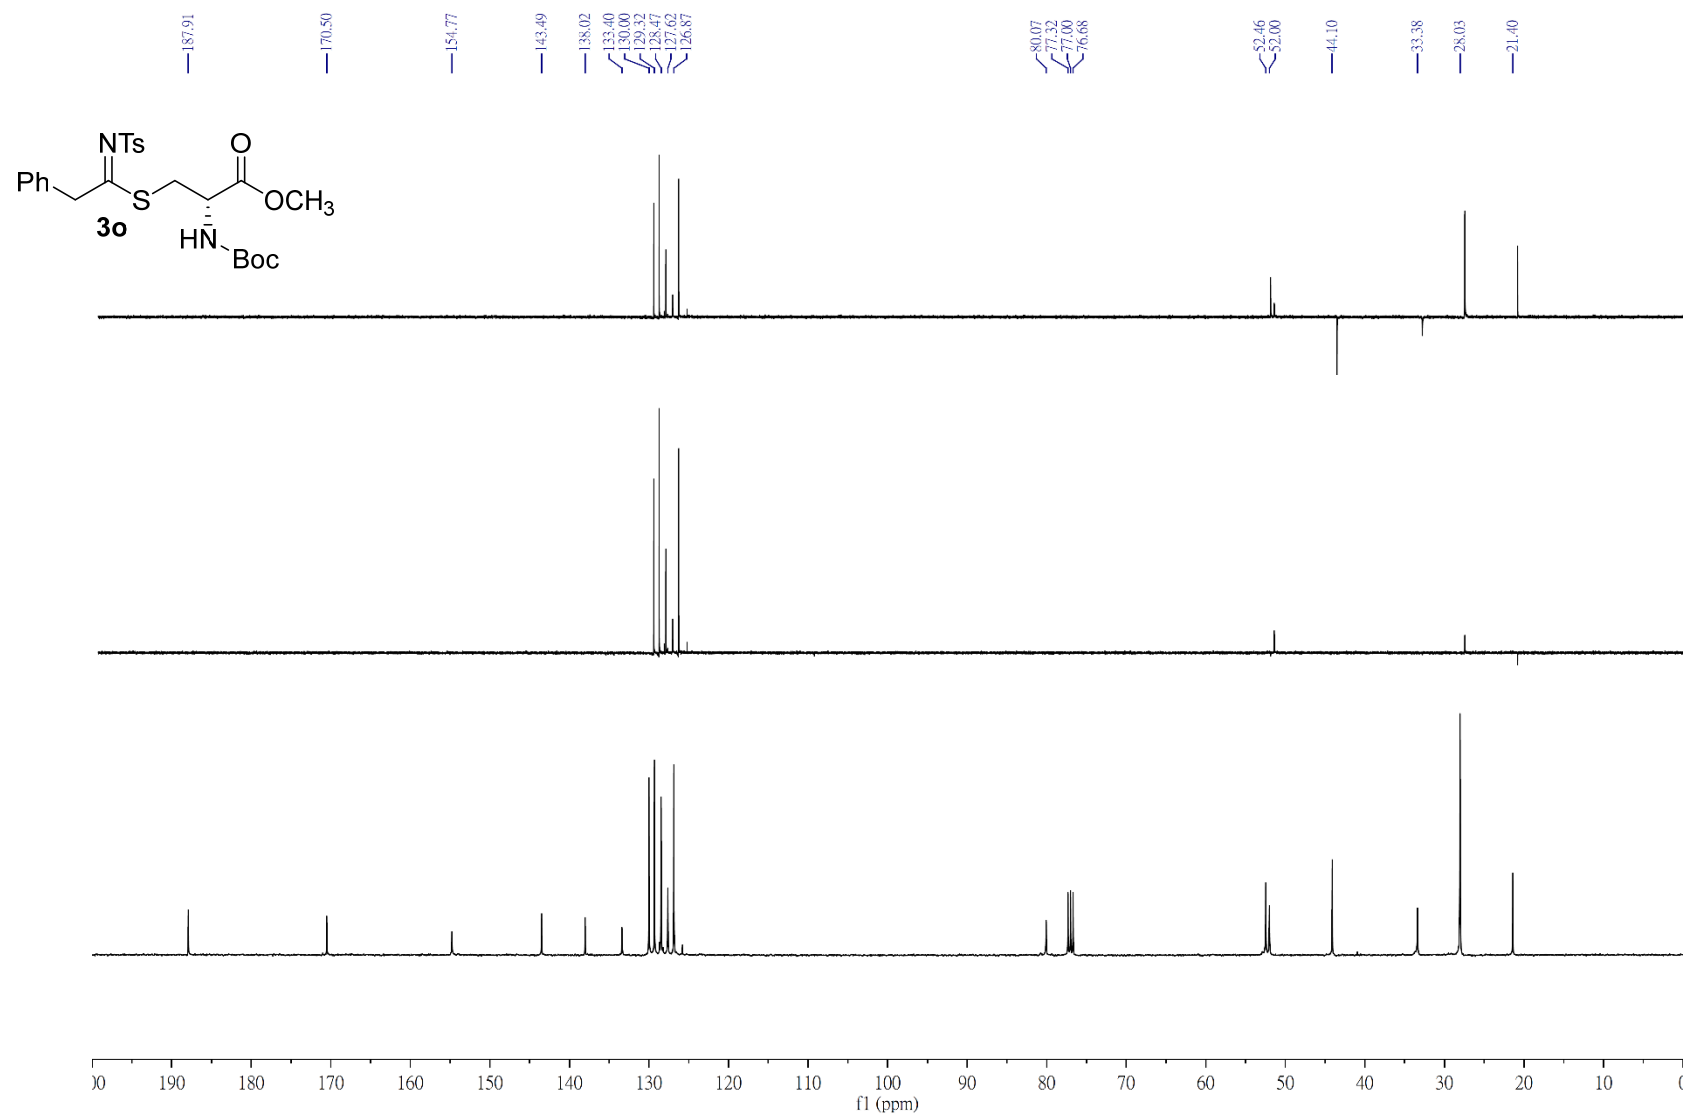

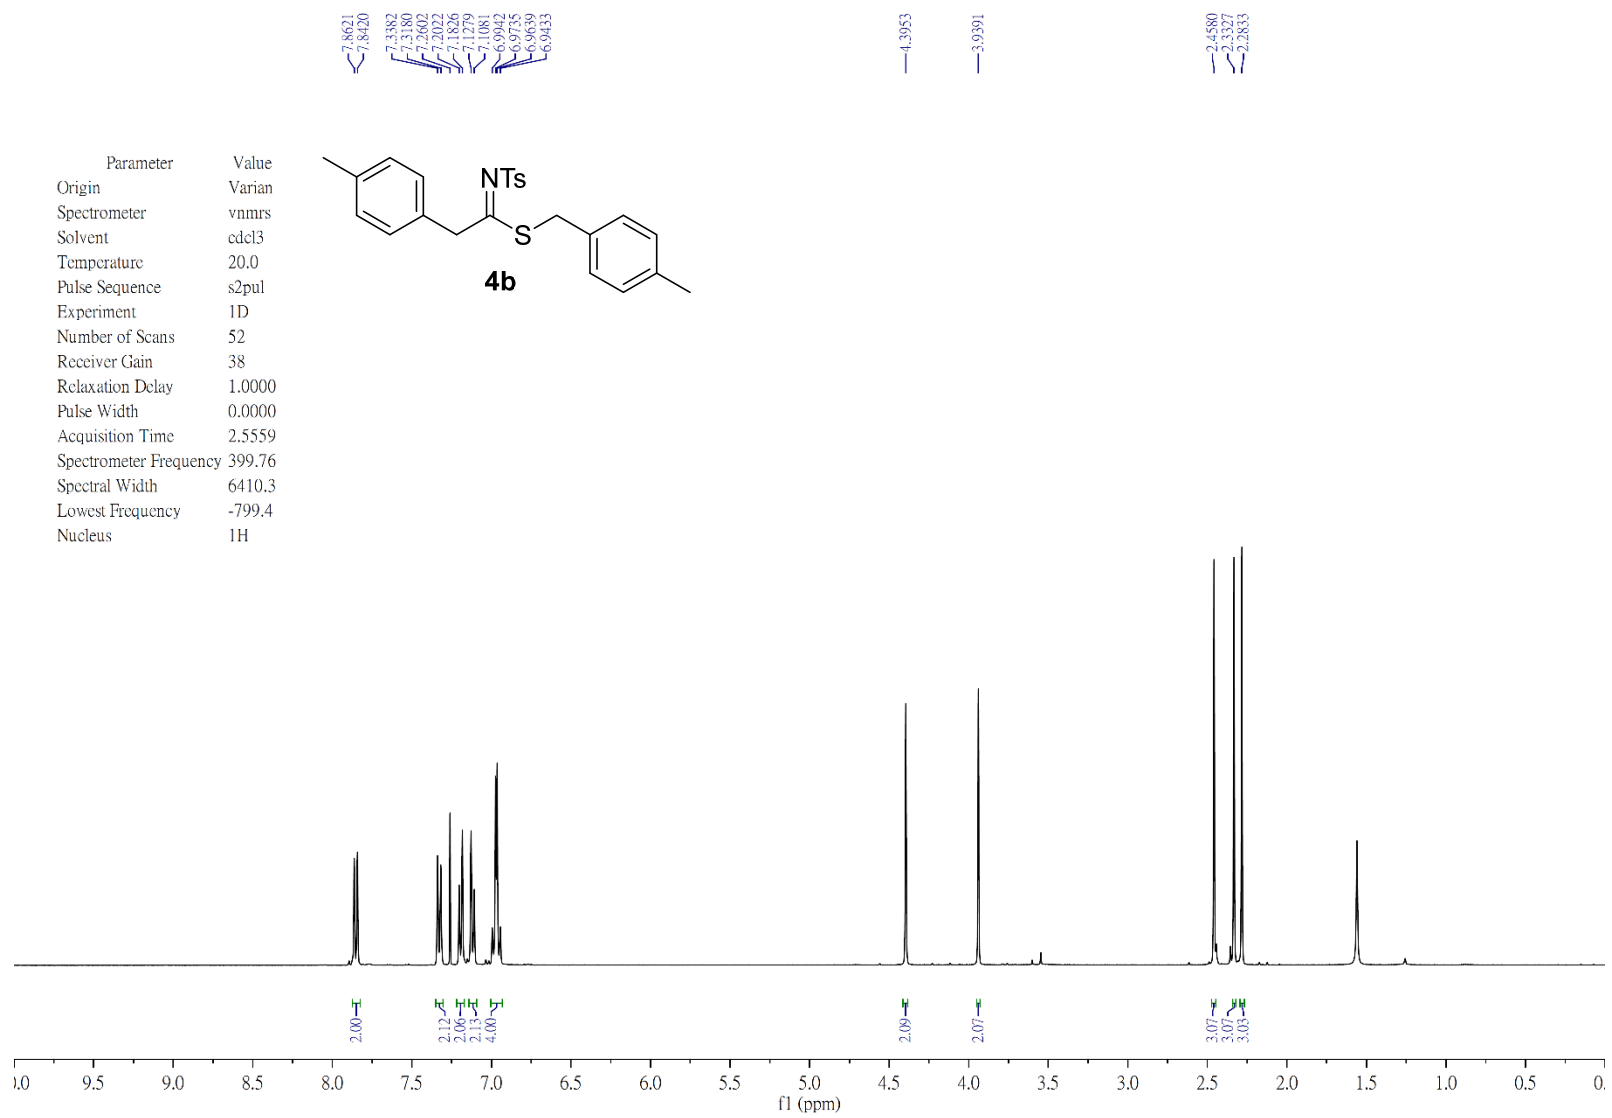

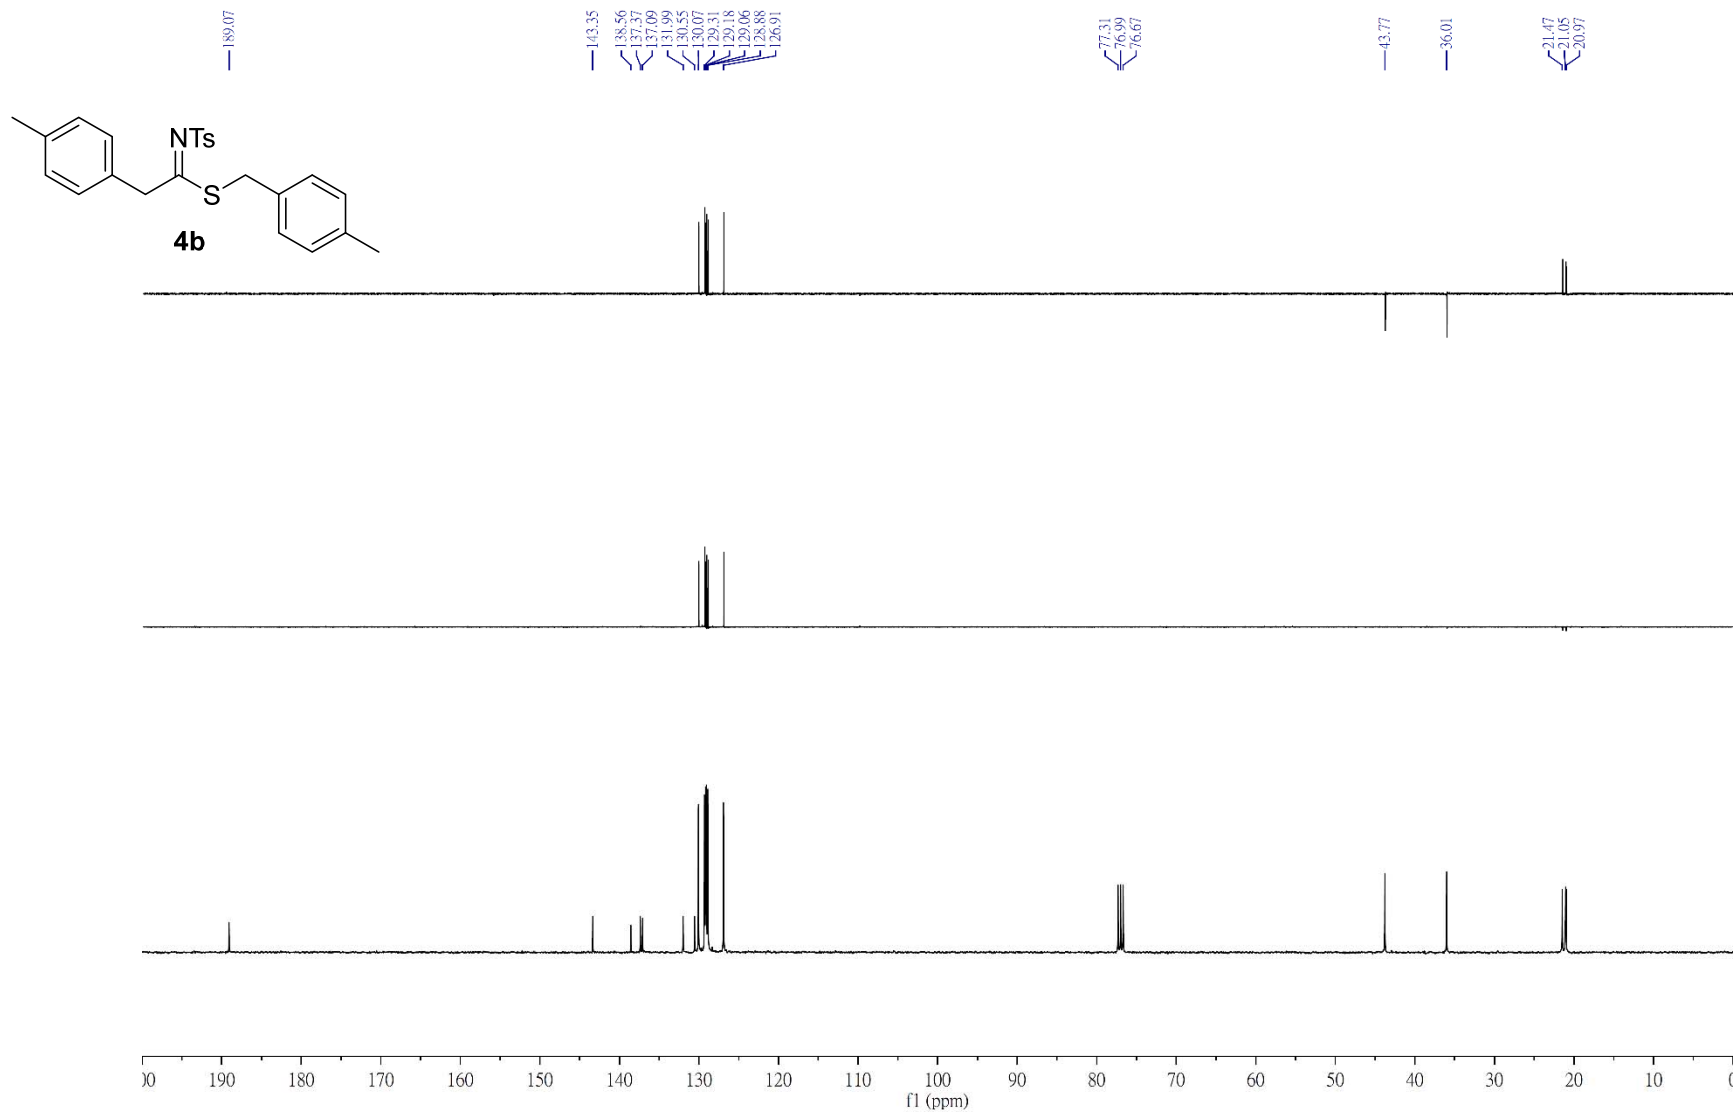



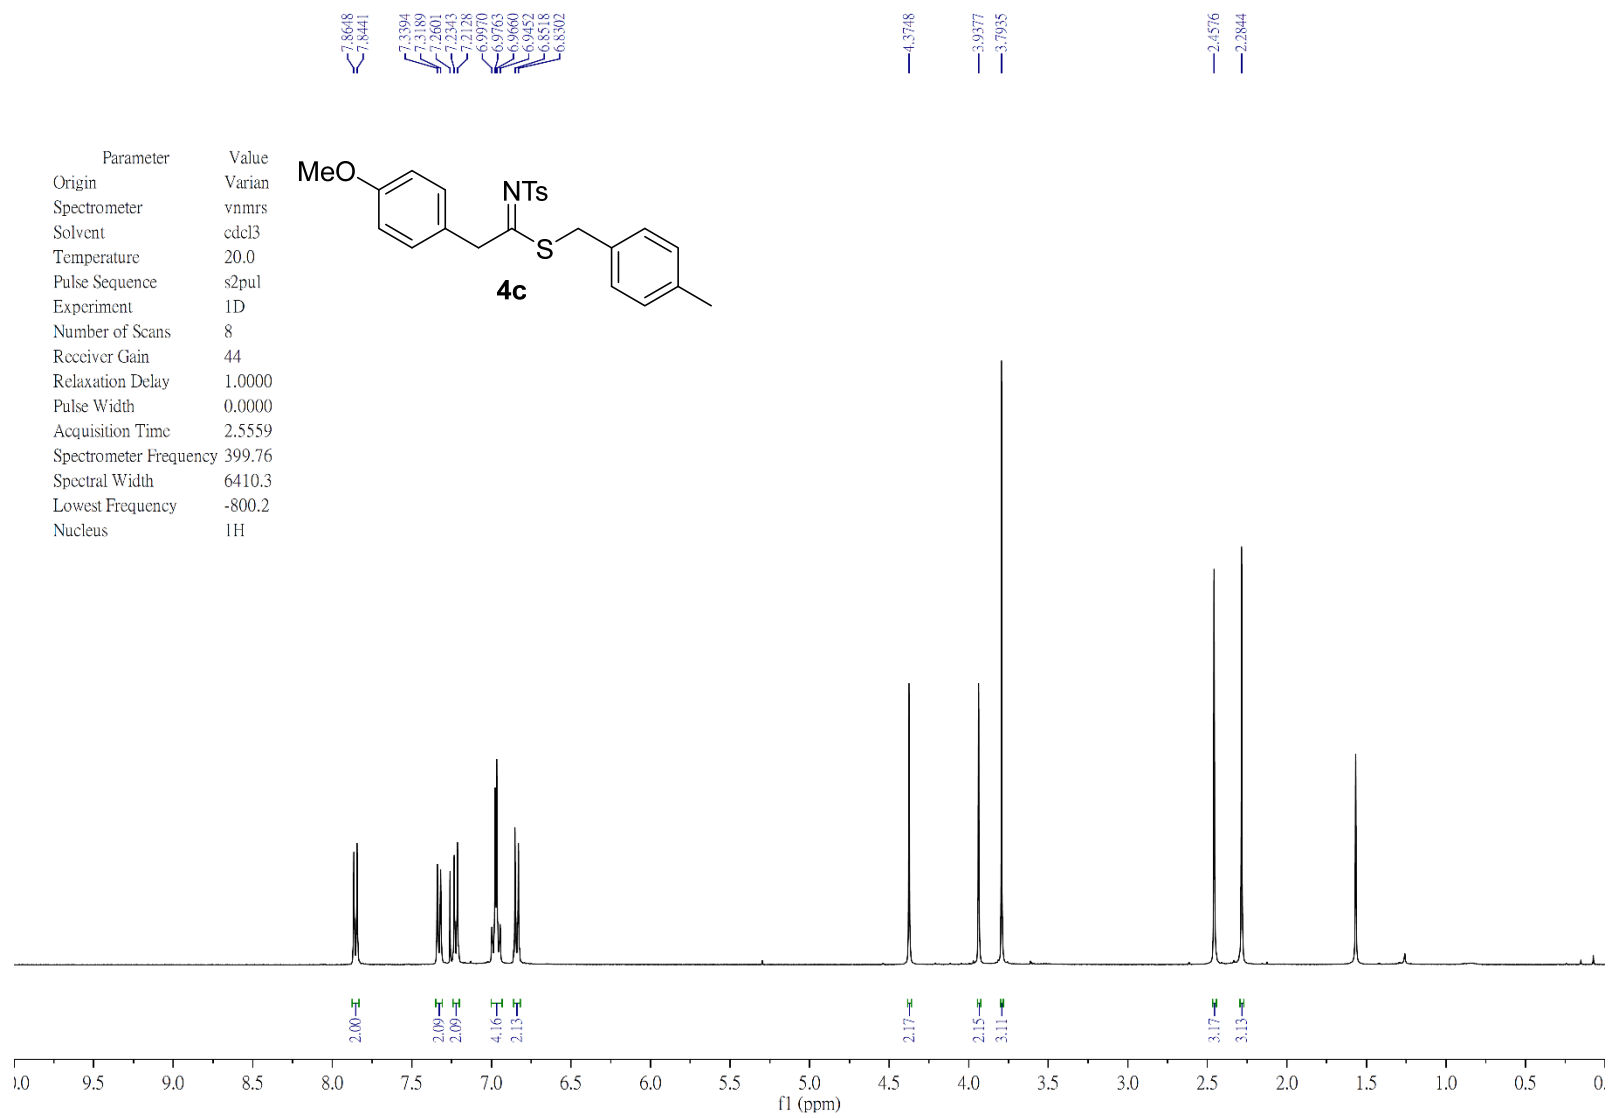

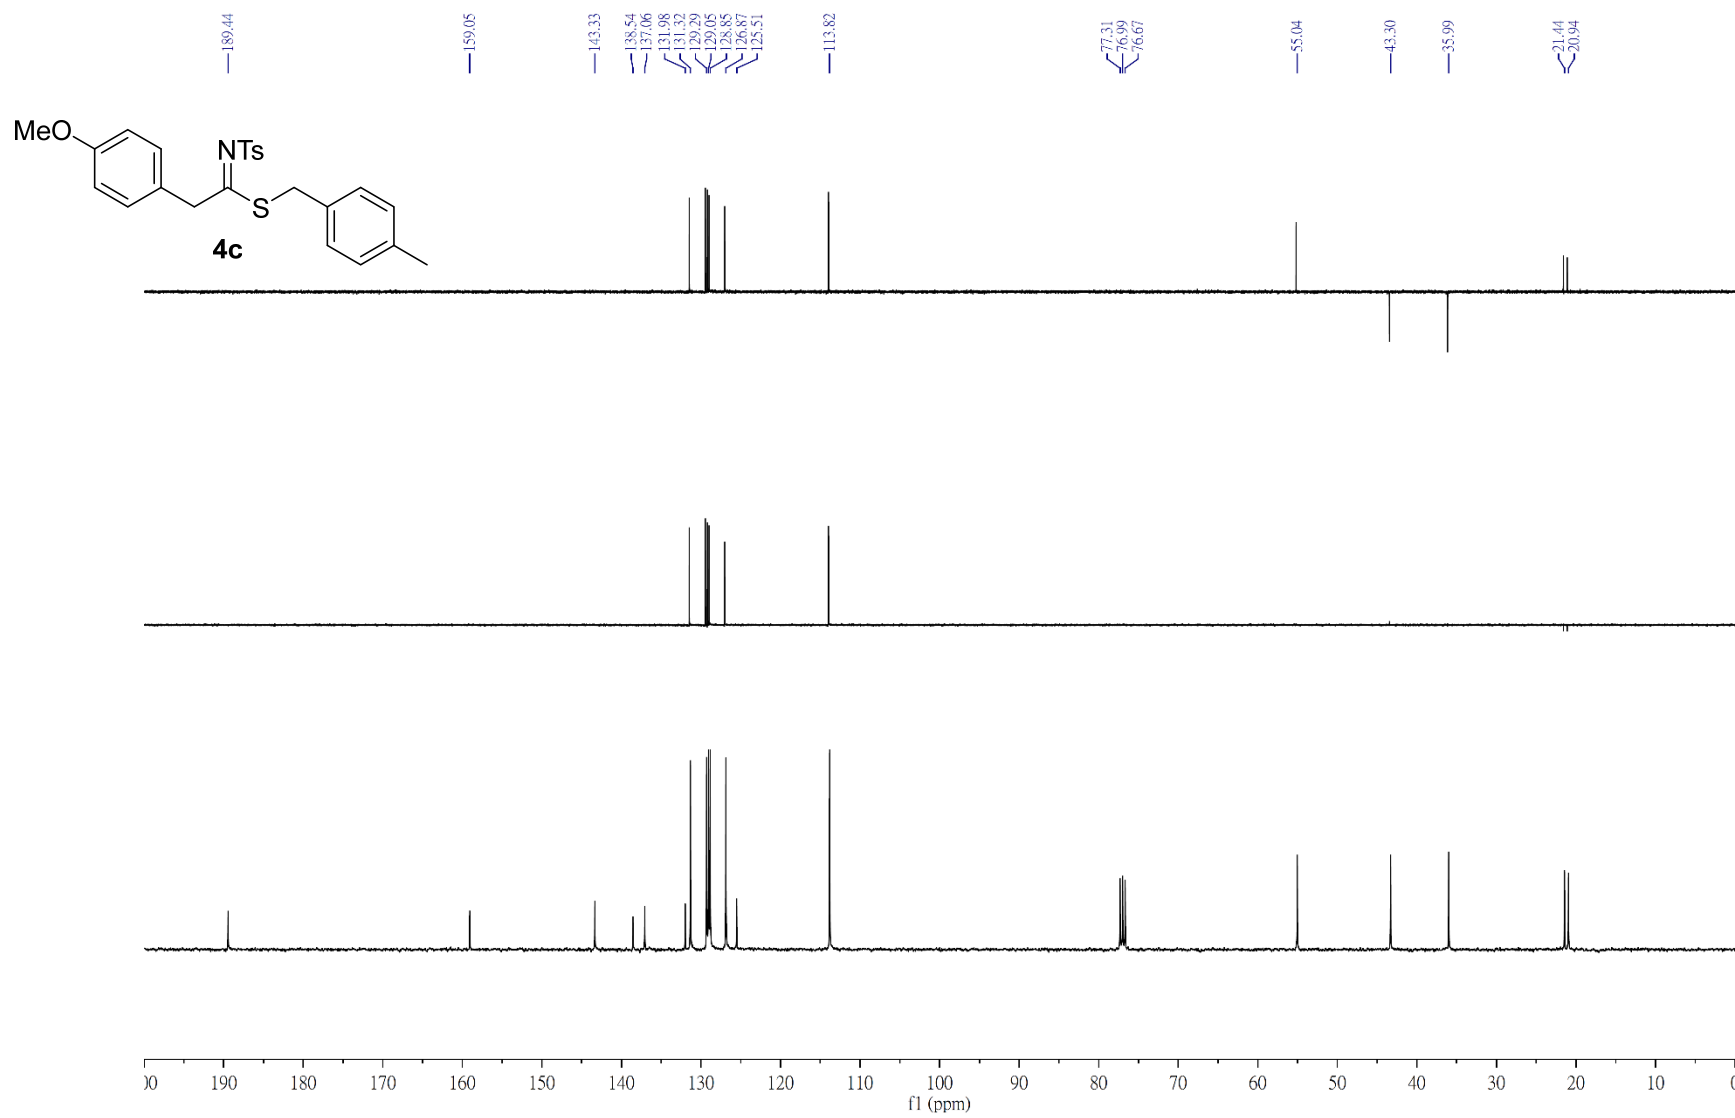

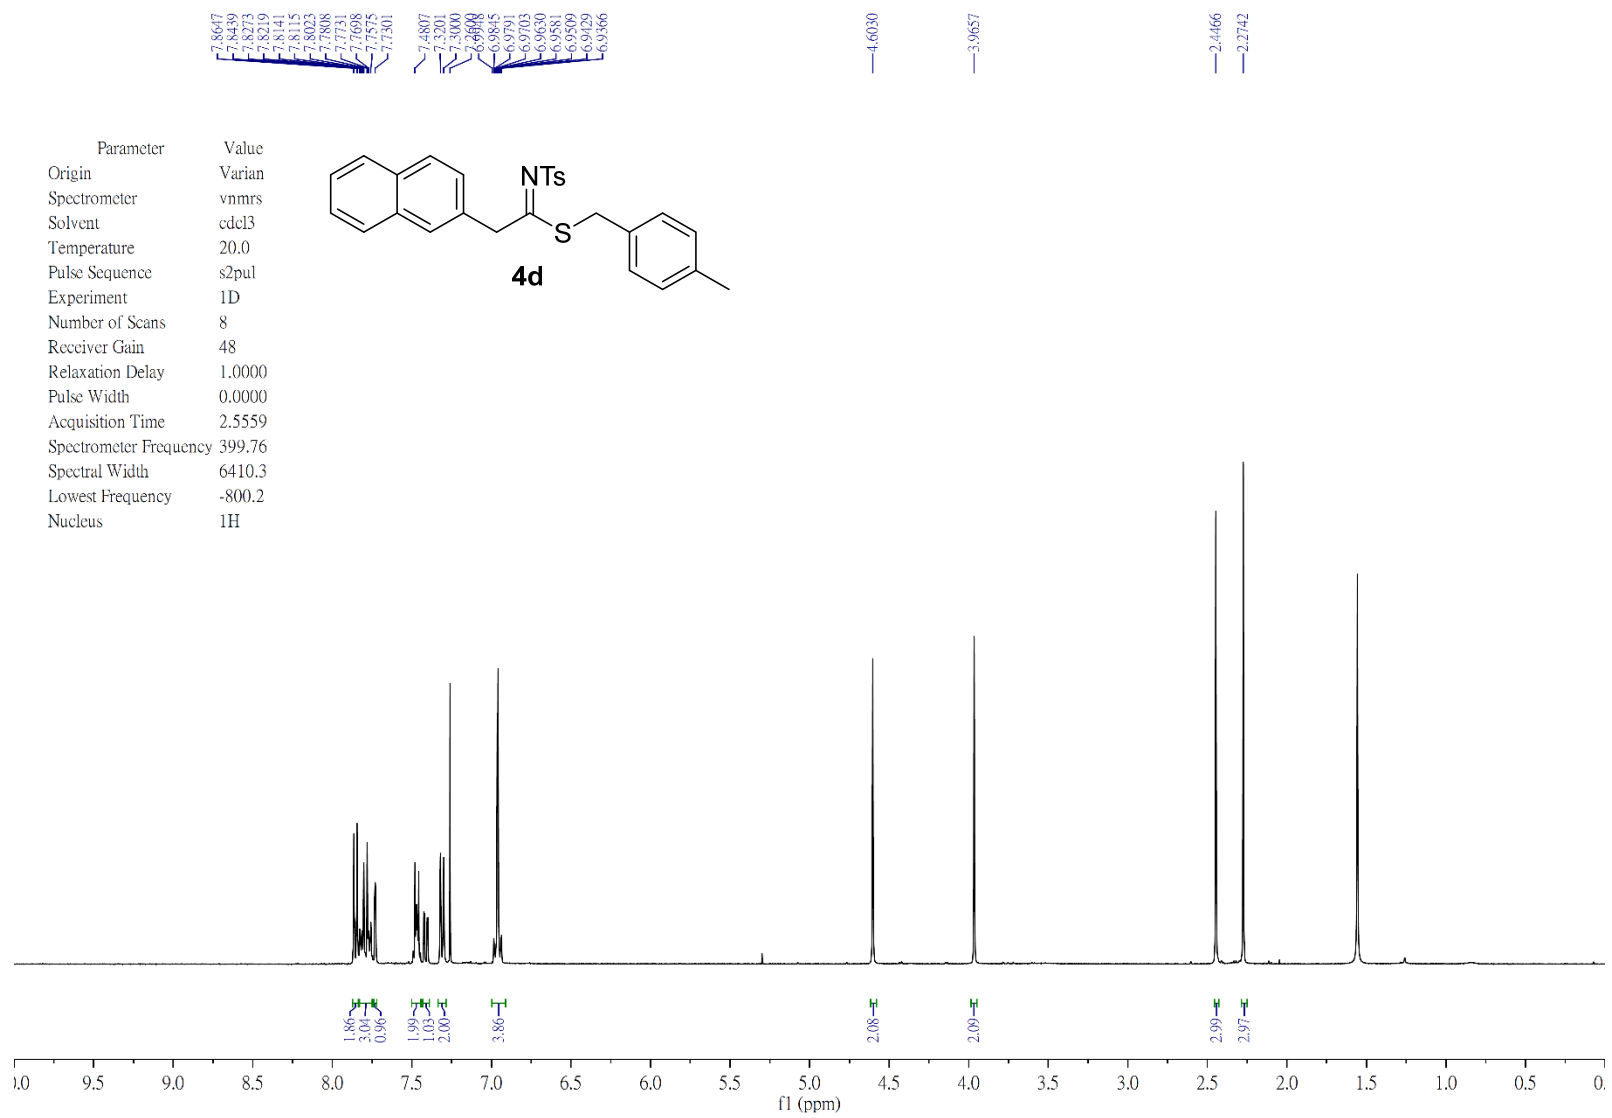

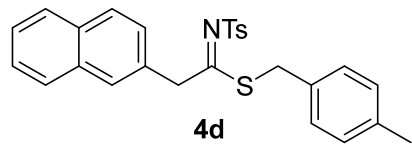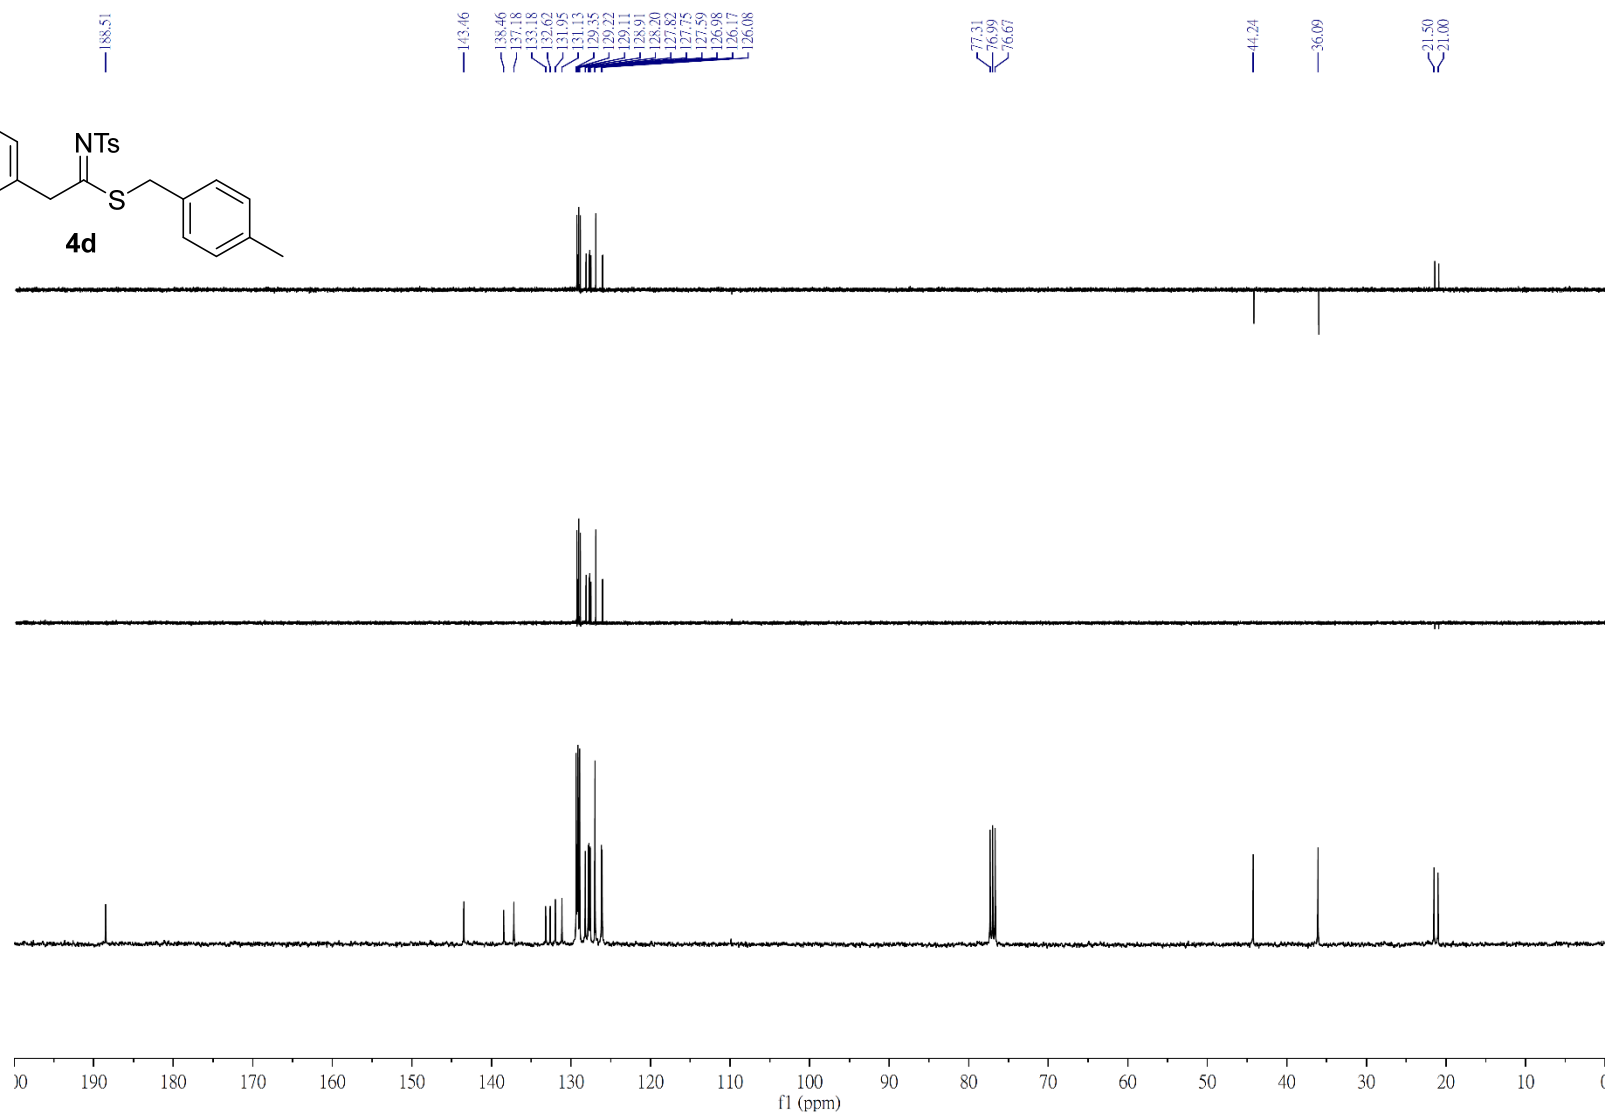

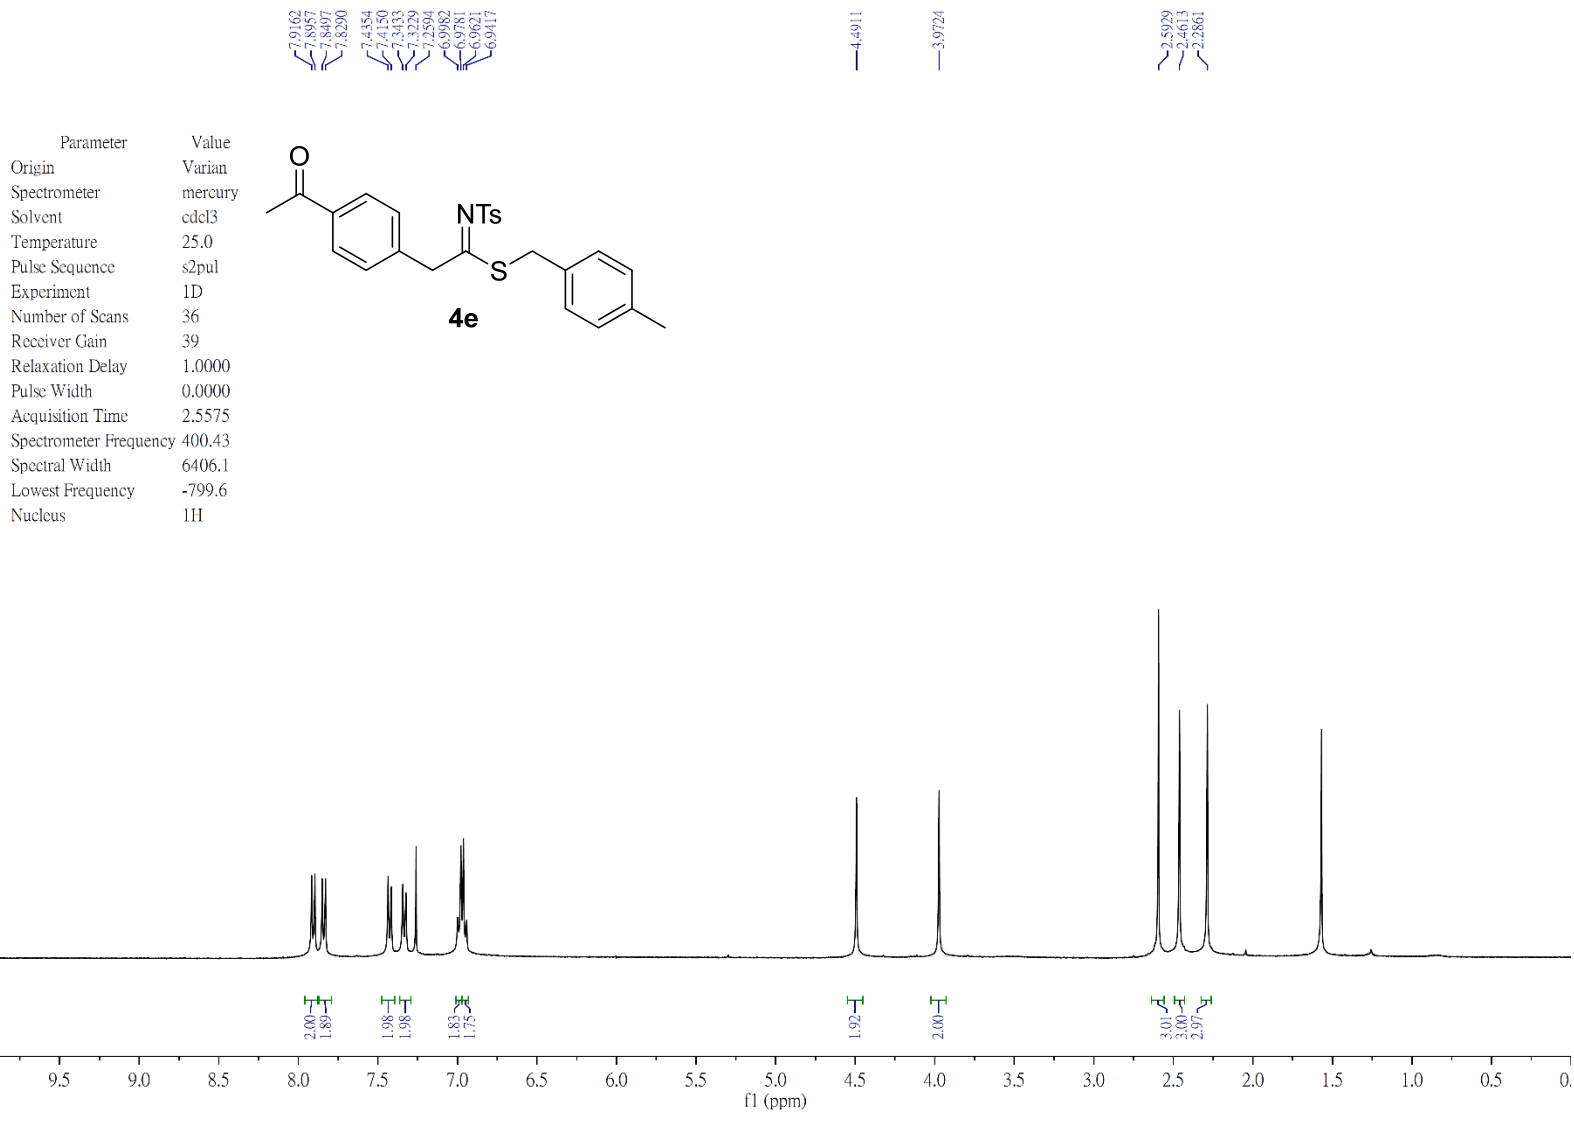

| Parameter              | Value   |
|------------------------|---------|
| Origin                 | Varian  |
| Spectrometer           | mercury |
| Solvent                | cdcl3   |
| Temperature            | 25.0    |
| Pulse Sequence         | s2pul   |
| Experiment             | 1D      |
| Number of Scans        | 36      |
| Receiver Gain          | 39      |
| Relaxation Delay       | 1.0000  |
| Pulse Width            | 0.0000  |
| Acquisition Time       | 2.5575  |
| Spectrometer Frequency | 400.43  |
| Spectral Width         | 6406.1  |
| Lowest Frequency       | -799.6  |
| Nucleus                | 1H      |

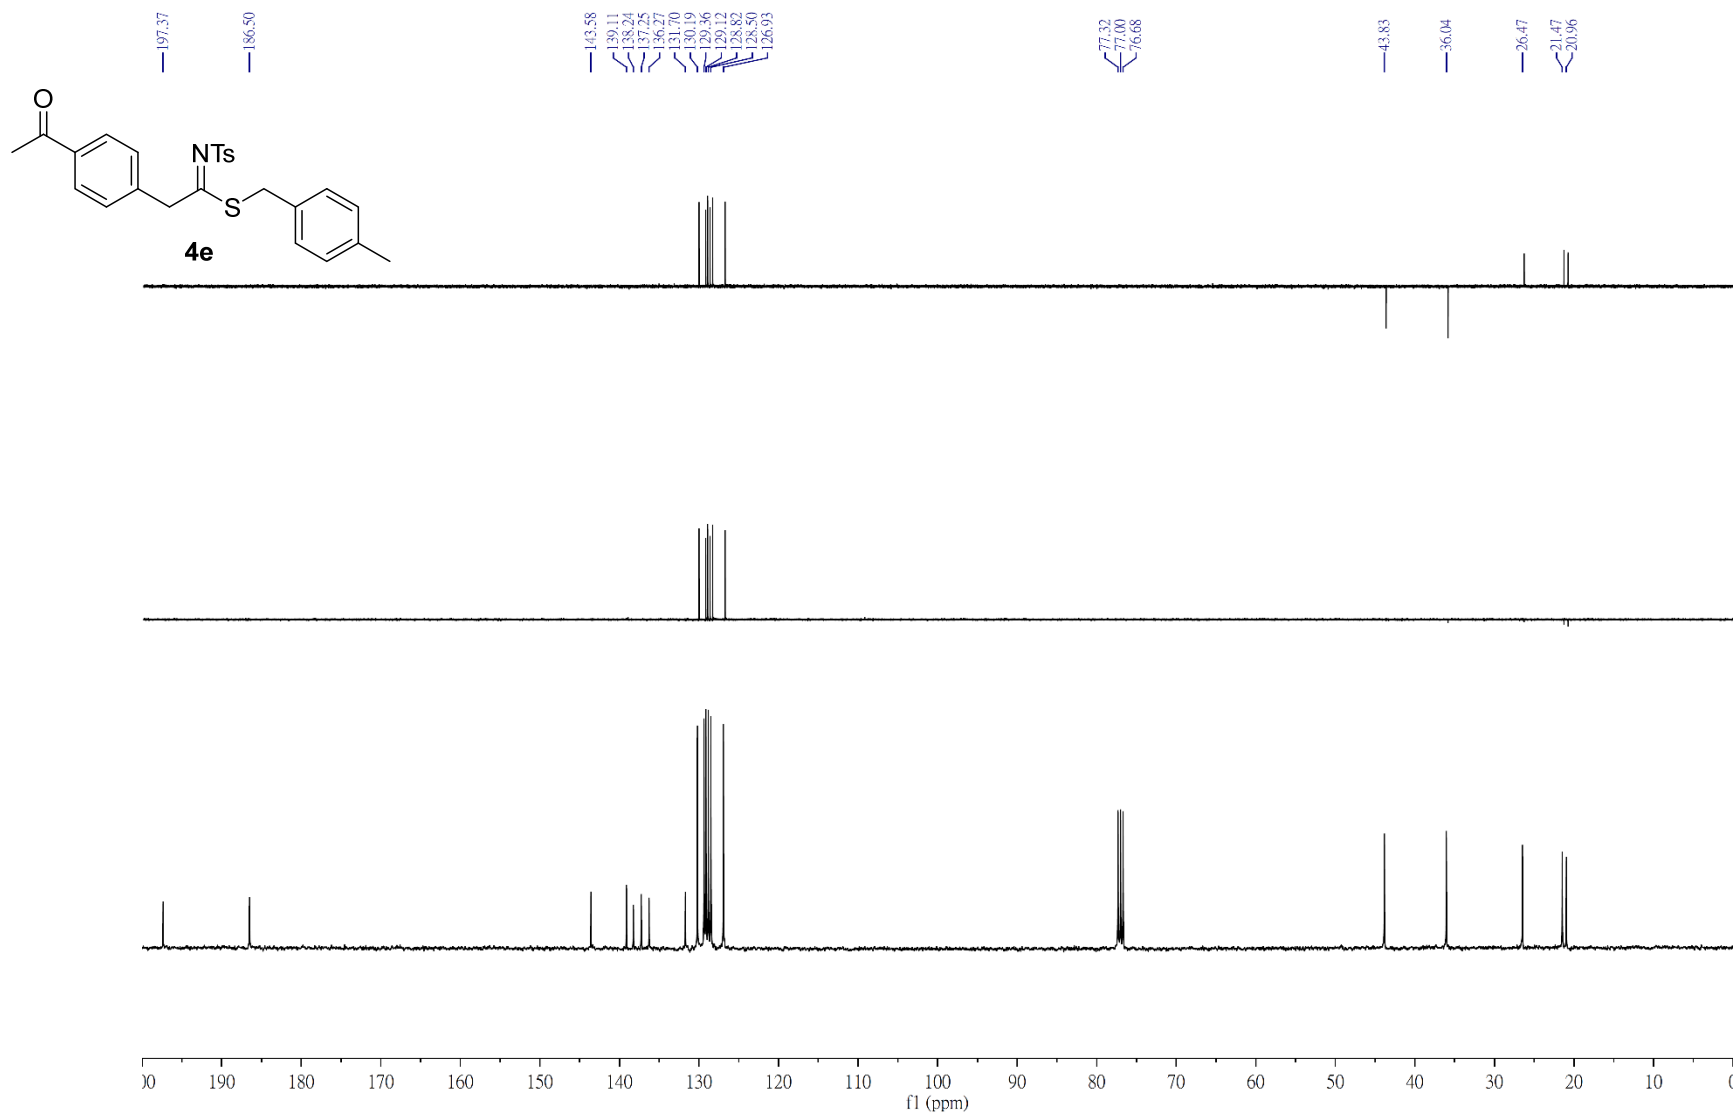

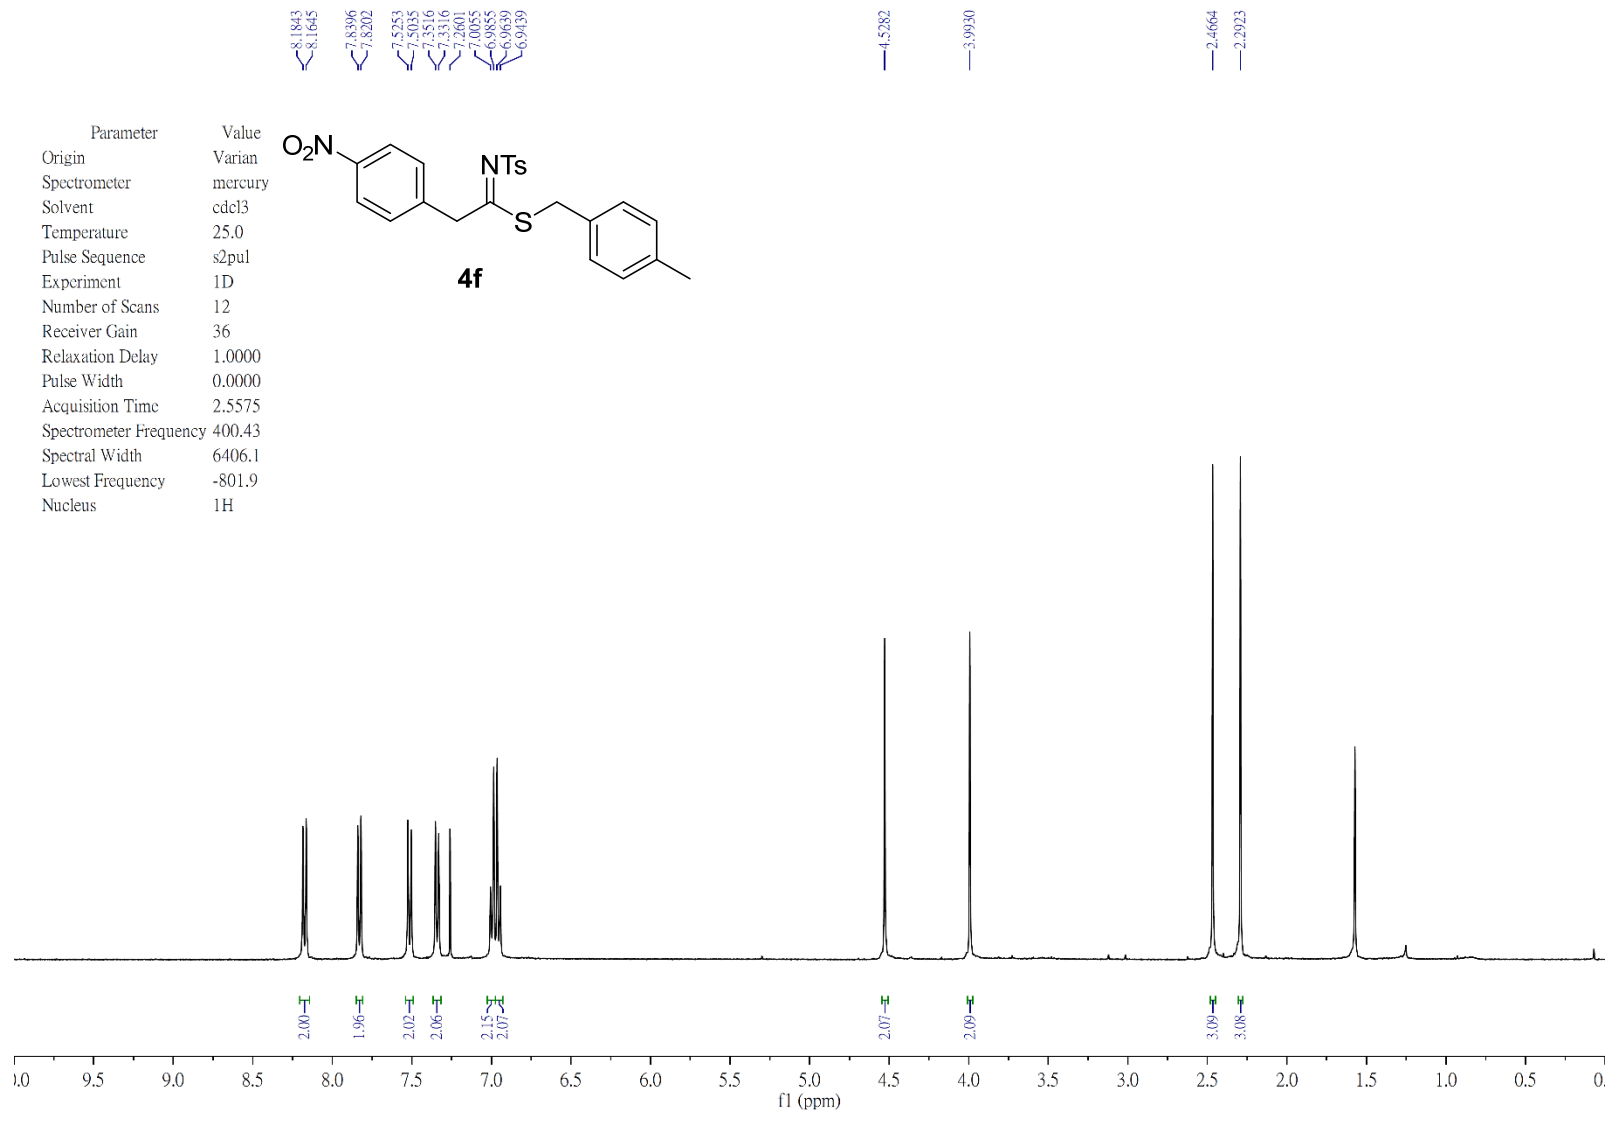

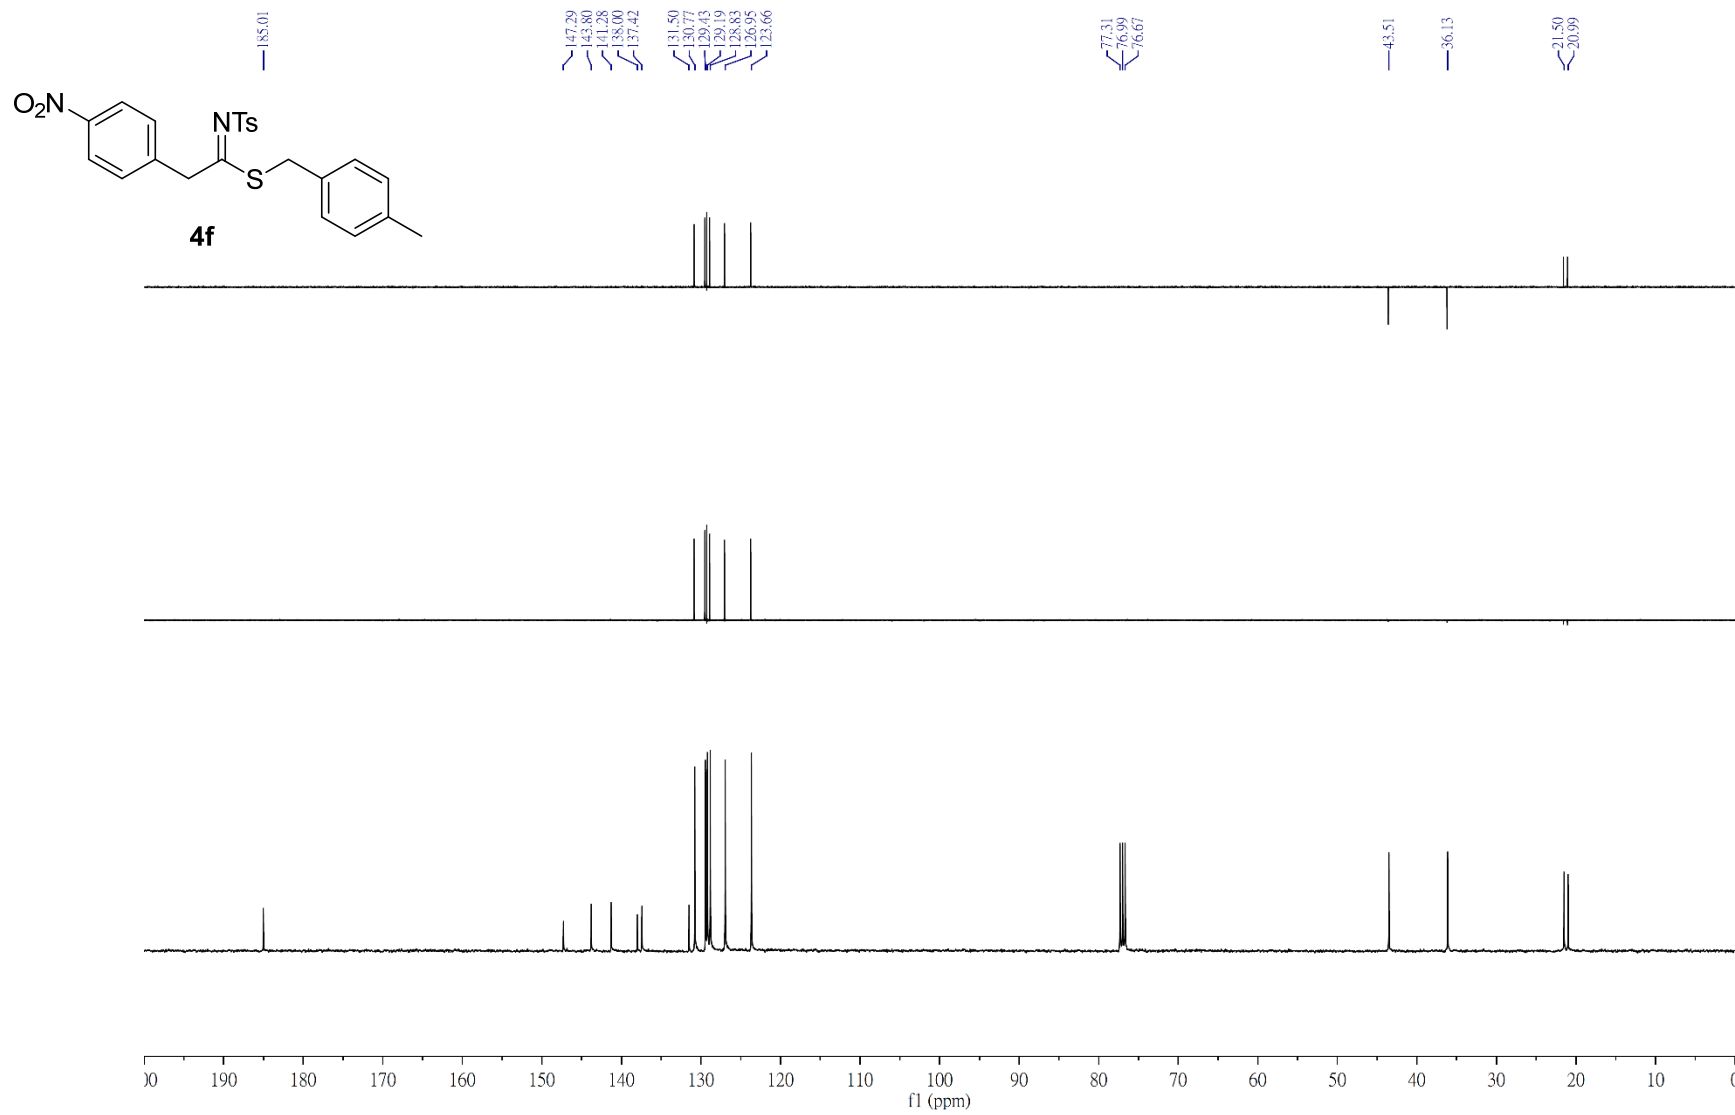



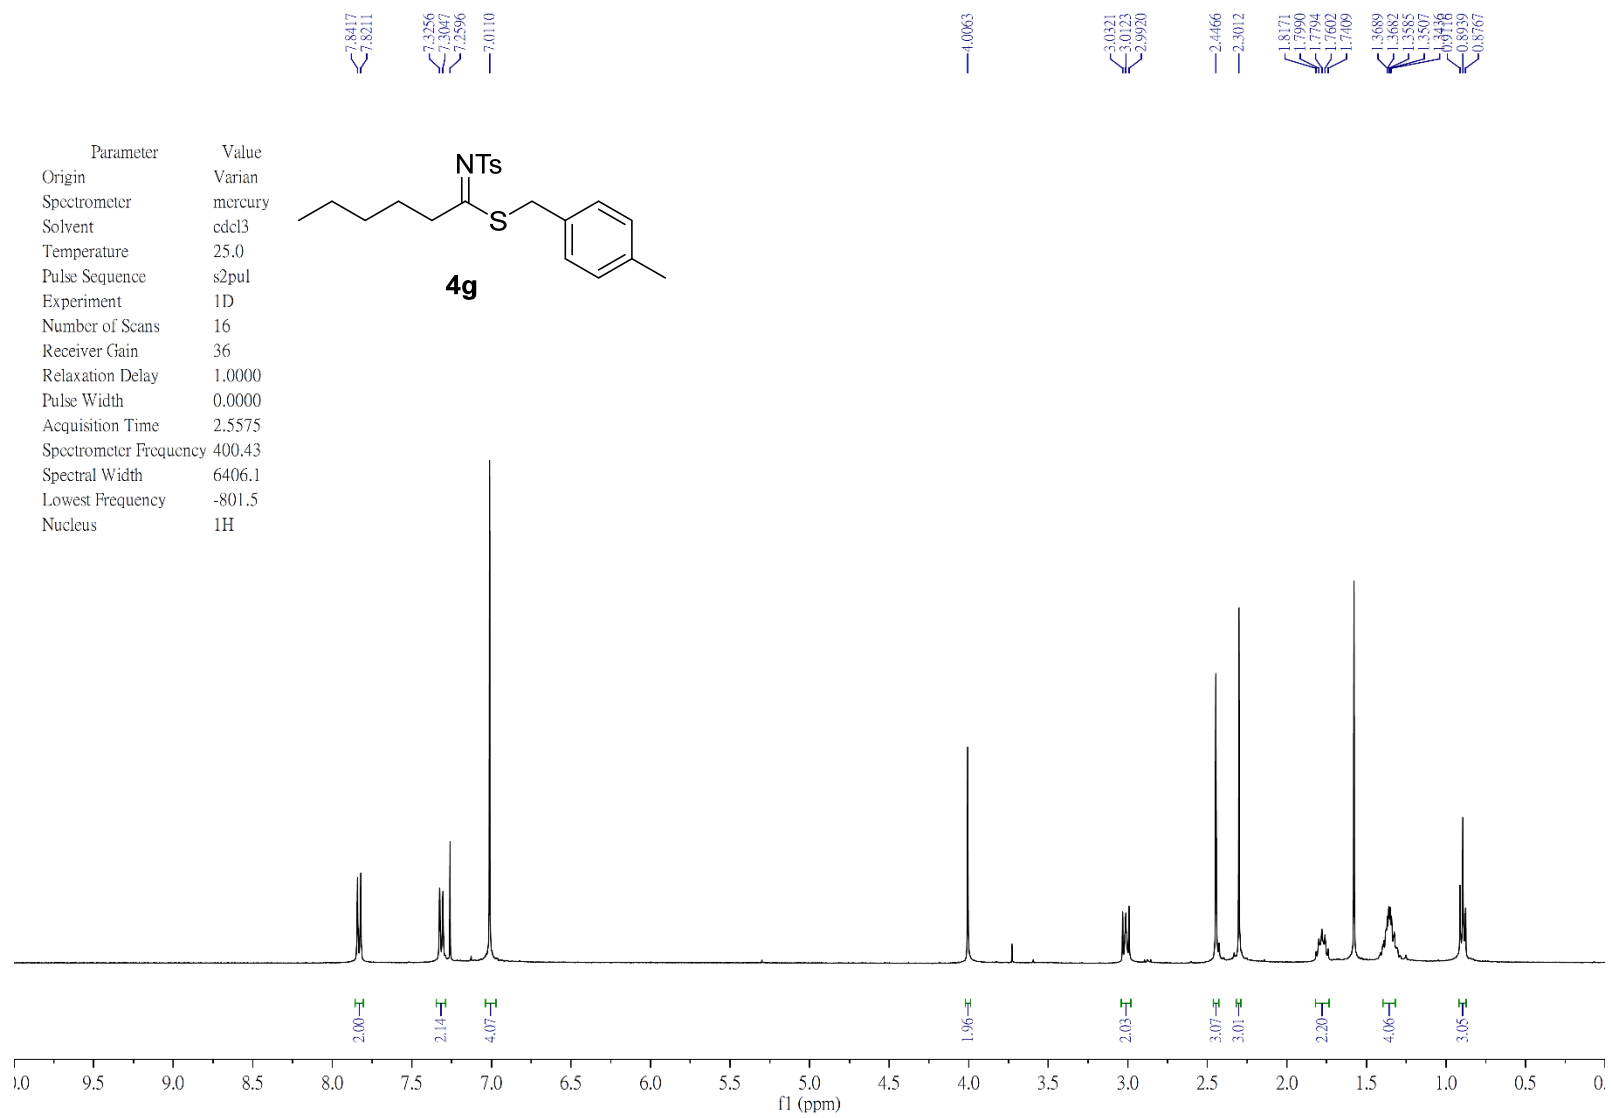

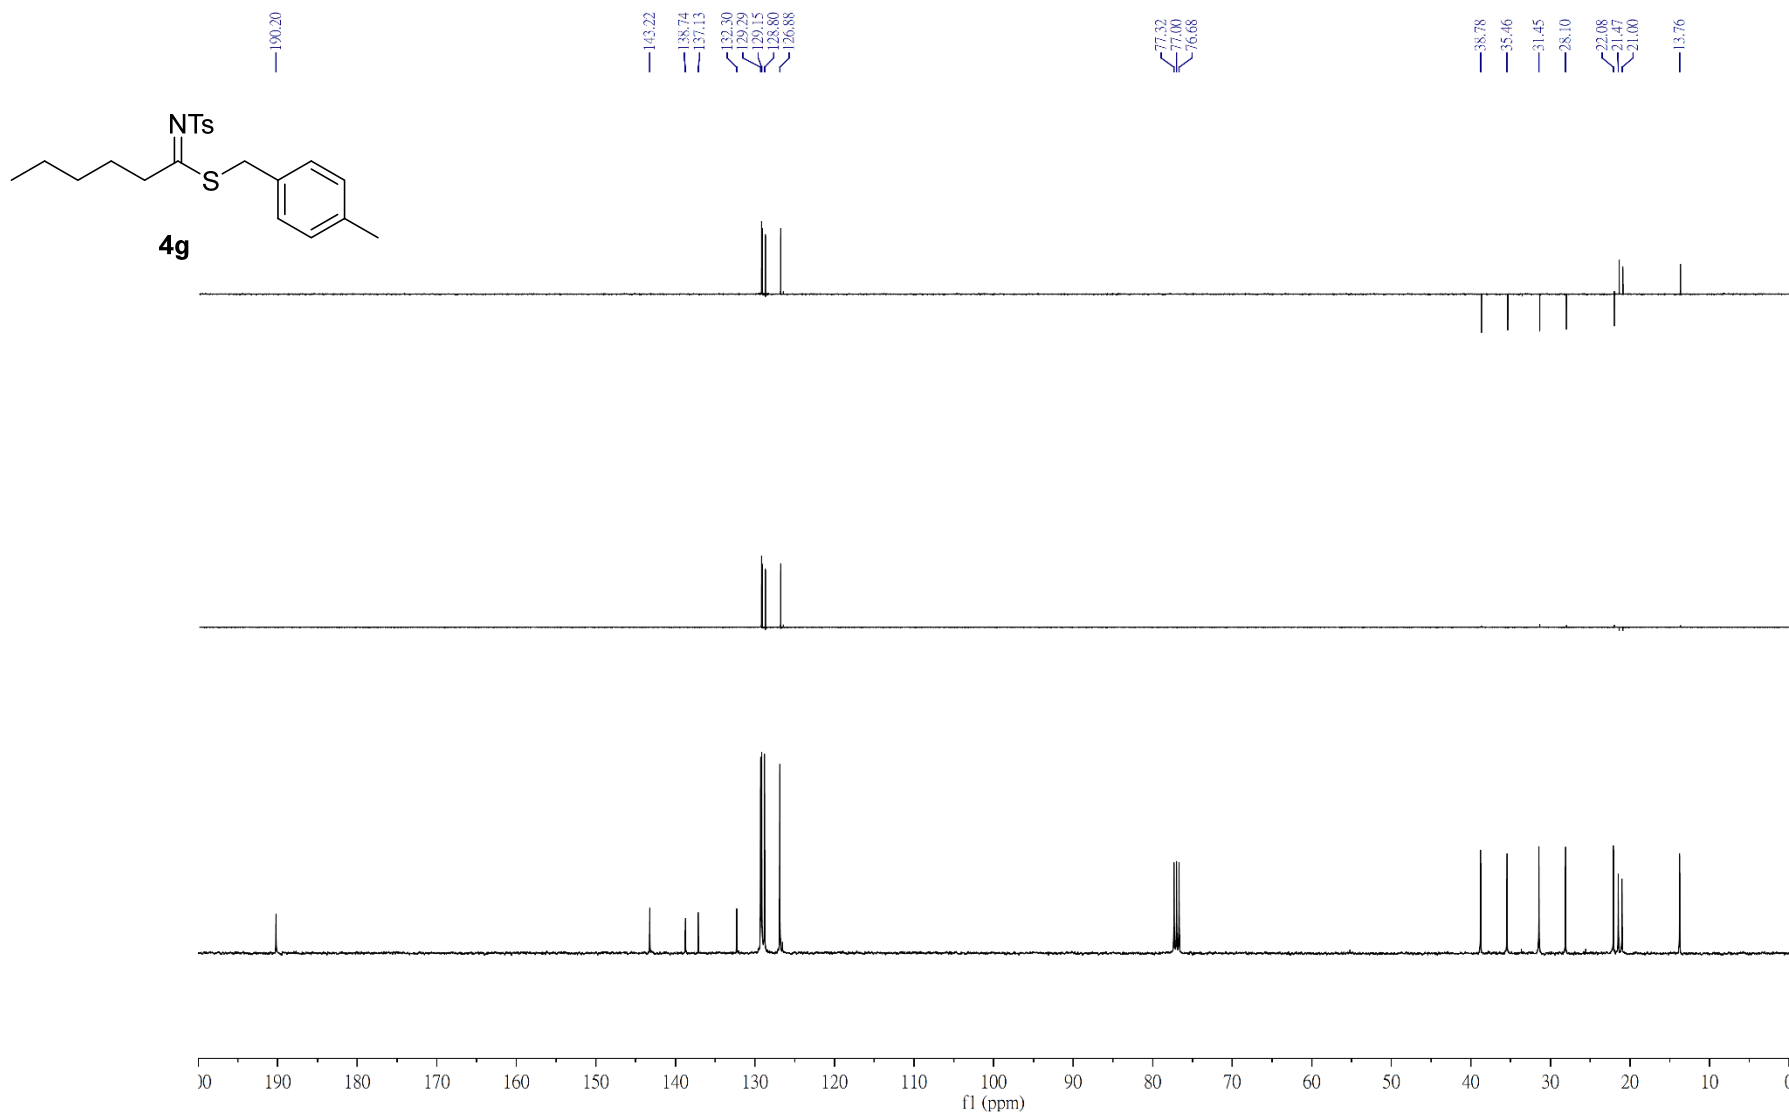

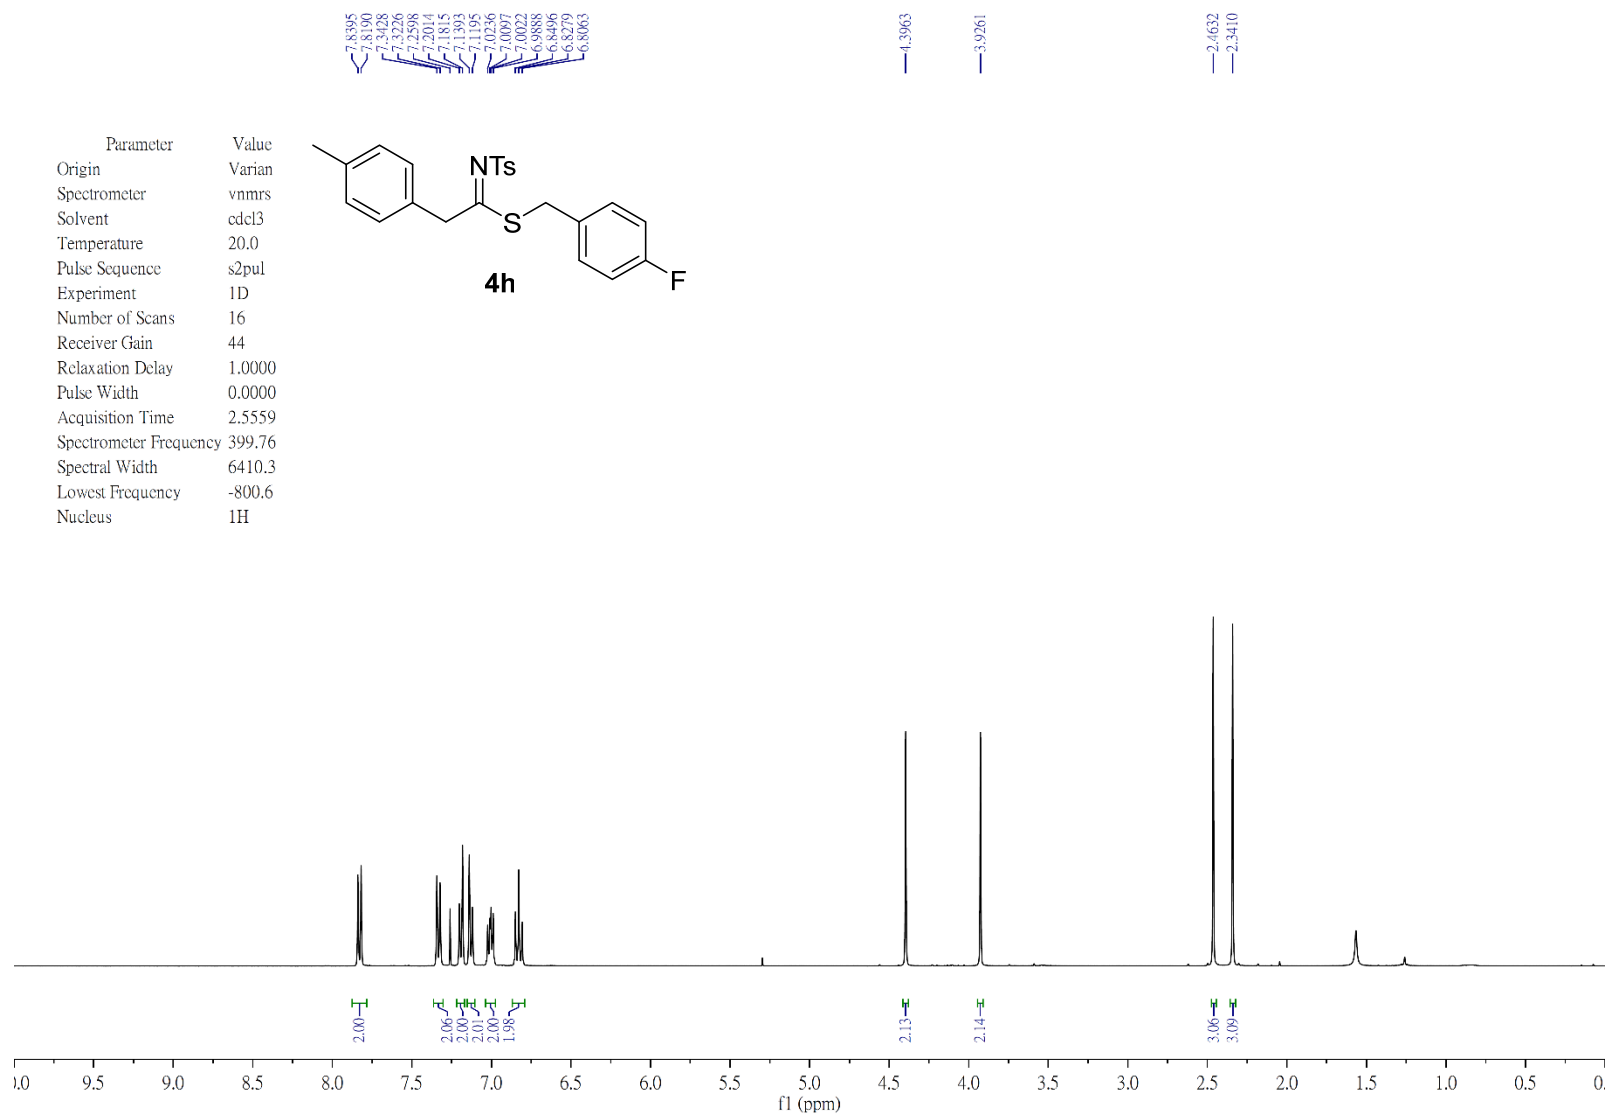

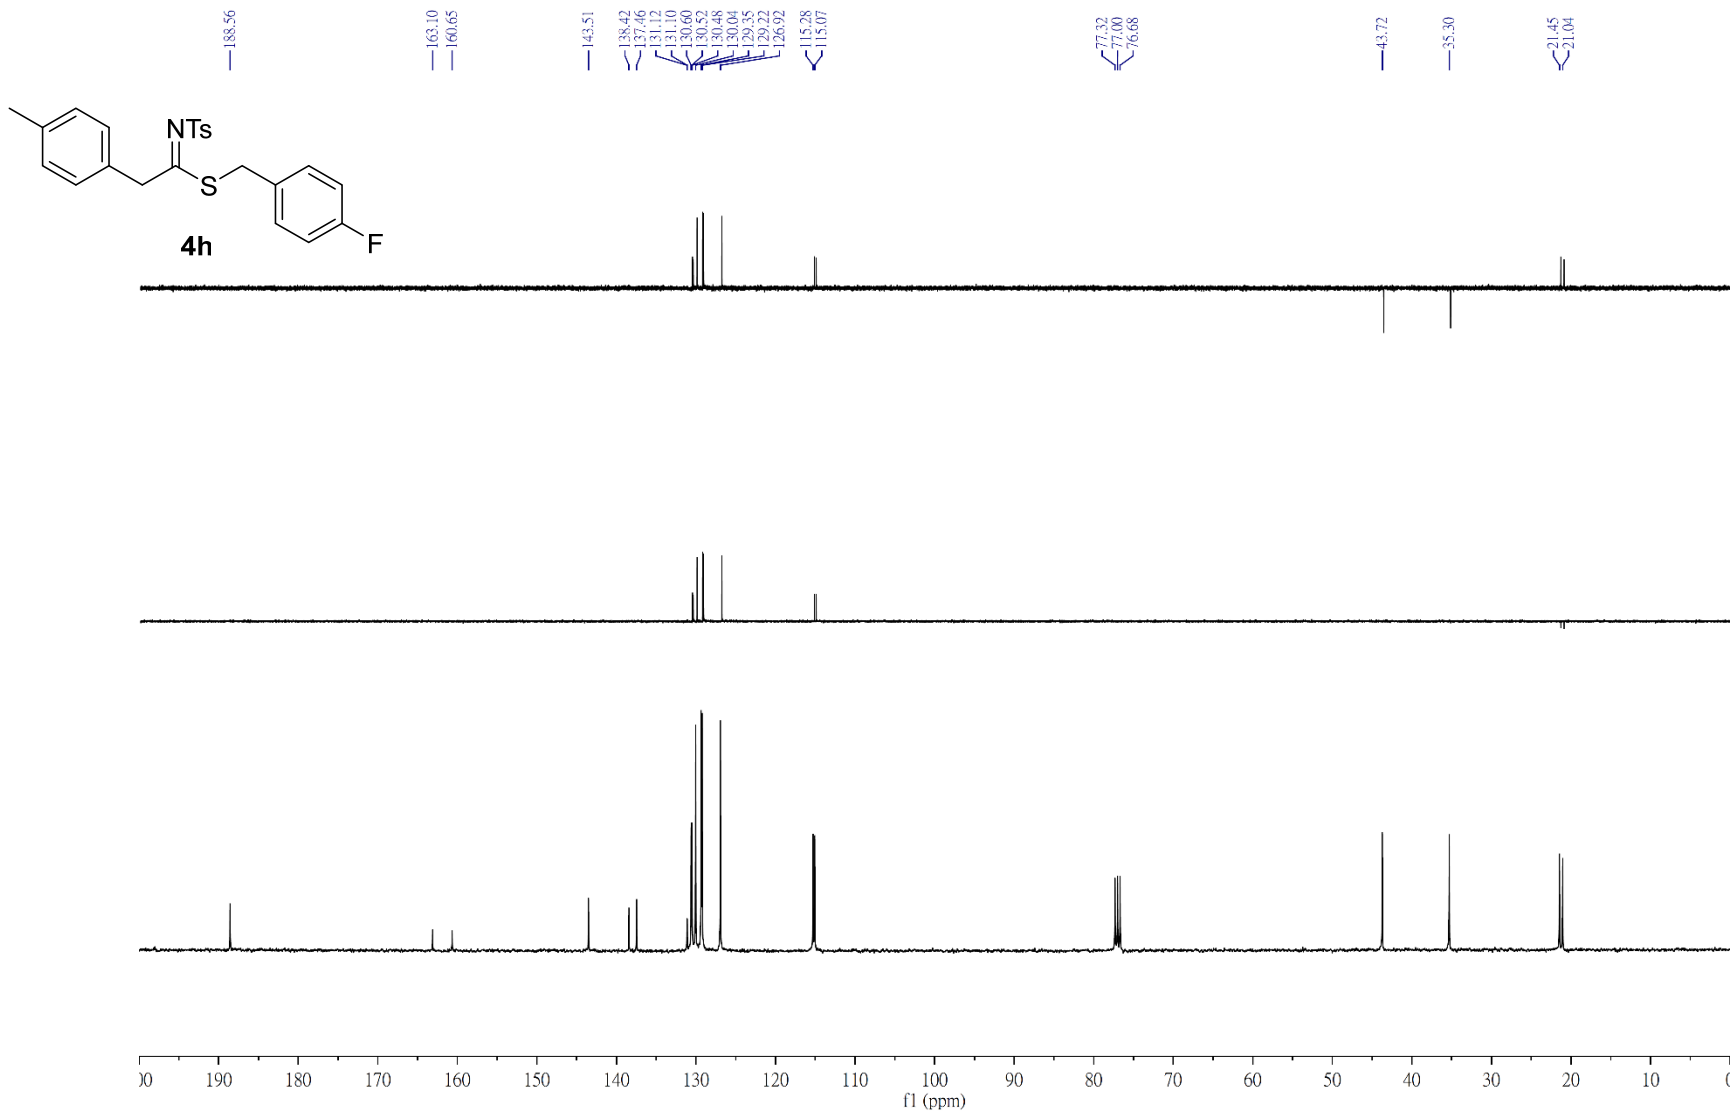

| Parameter              | Value    |
|------------------------|----------|
| Origin                 | Varian   |
| Spectrometer           | nmrs     |
| Solvent                | cdcl3    |
| Temperature            | 20.0     |
| Pulse Sequence         | s2pul    |
| Experiment             | 1D       |
| Number of Scans        | 16       |
| Receiver Gain          | 60       |
| Relaxation Delay       | 1.0000   |
| Pulse Width            | 0.0000   |
| Acquisition Time       | 0.7340   |
| Spectrometer Frequency | 376.11   |
| Spectral Width         | 89285.7  |
| Lowest Frequency       | -77332.4 |
| Nucleus                | 19F      |

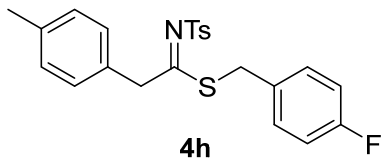

-116.027

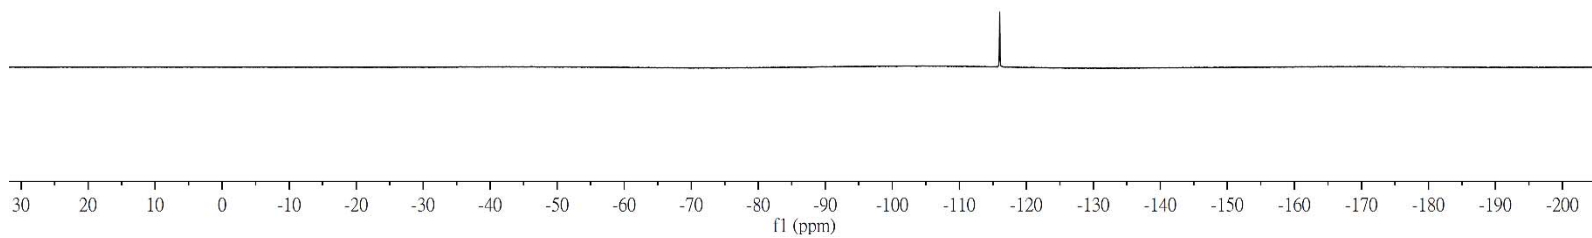

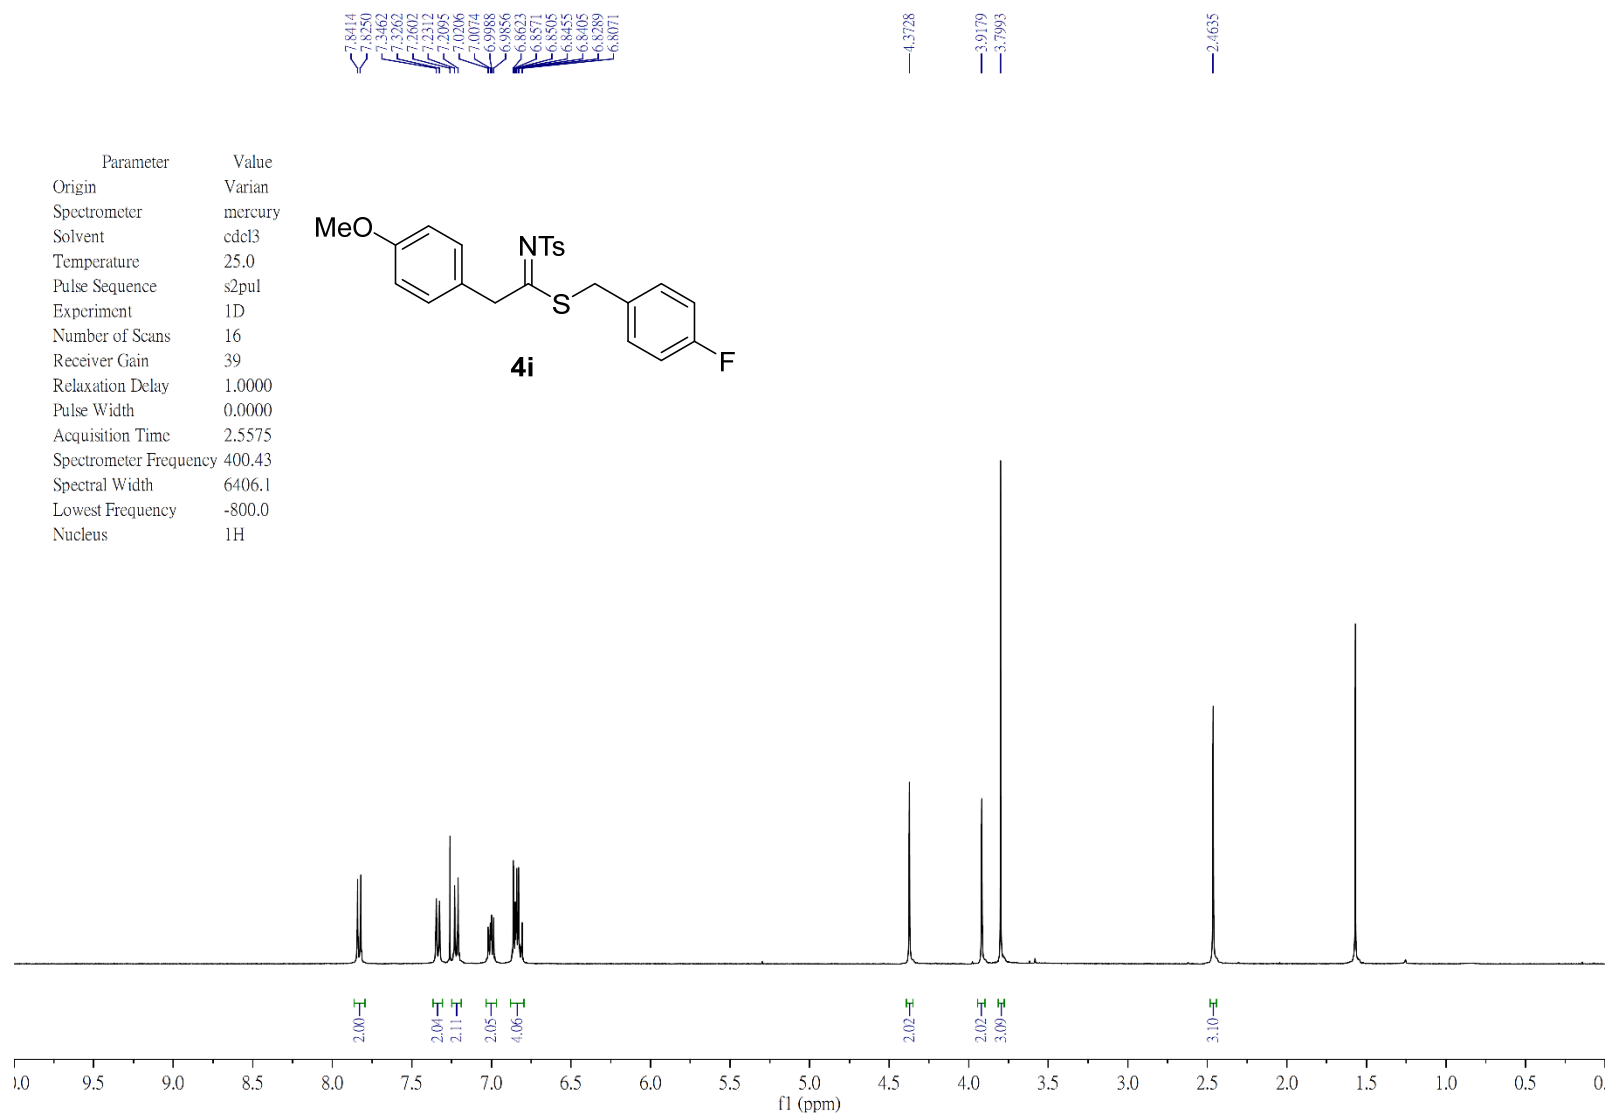

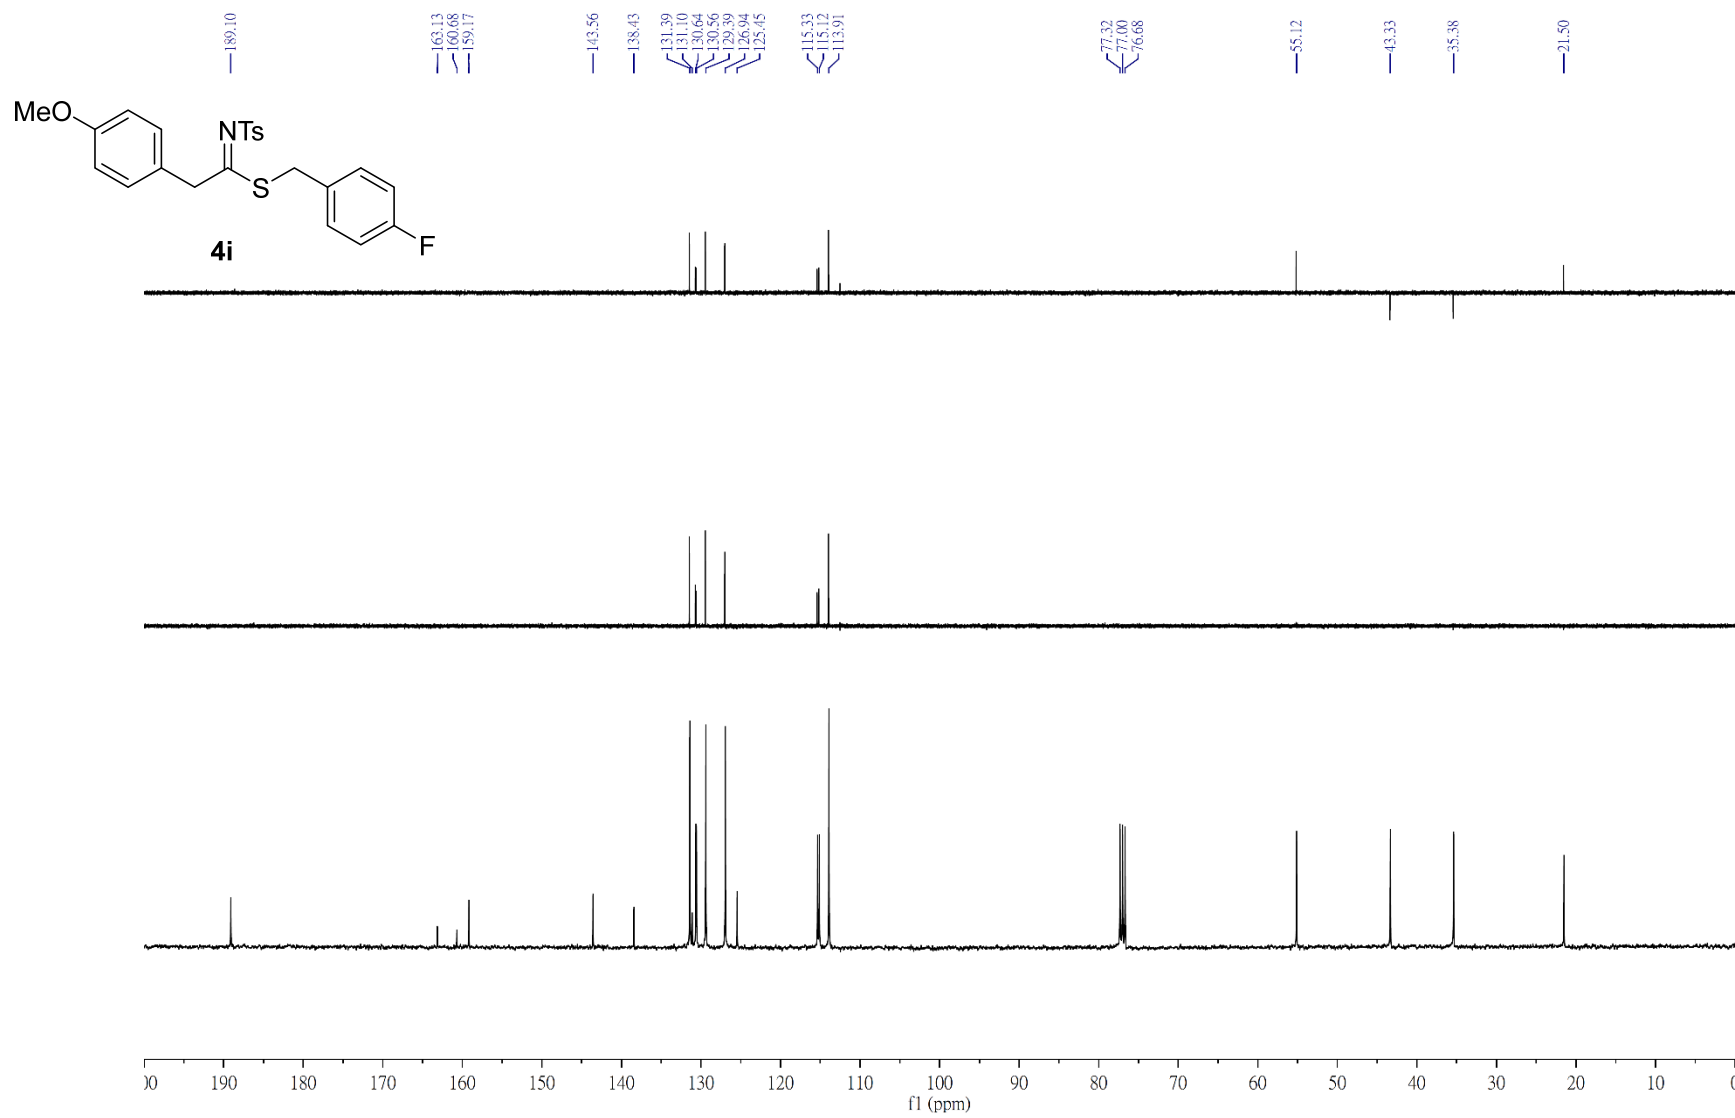

| Parameter              | Value    |
|------------------------|----------|
| Origin                 | Varian   |
| Spectrometer           | nmr      |
| Solvent                | cdcl3    |
| Temperature            | 20.0     |
| Pulse Sequence         | s2pul    |
| Experiment             | 1D       |
| Number of Scans        | 8        |
| Receiver Gain          | 60       |
| Relaxation Delay       | 1.0000   |
| Pulse Width            | 0.0000   |
| Acquisition Time       | 0.7340   |
| Spectrometer Frequency | 376.11   |
| Spectral Width         | 89285.7  |
| Lowest Frequency       | -77332.4 |
| Nucleus                | 19F      |

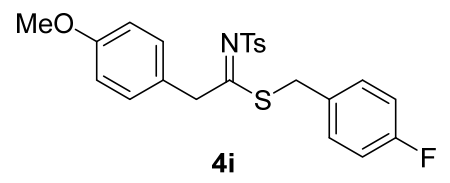

-116.015

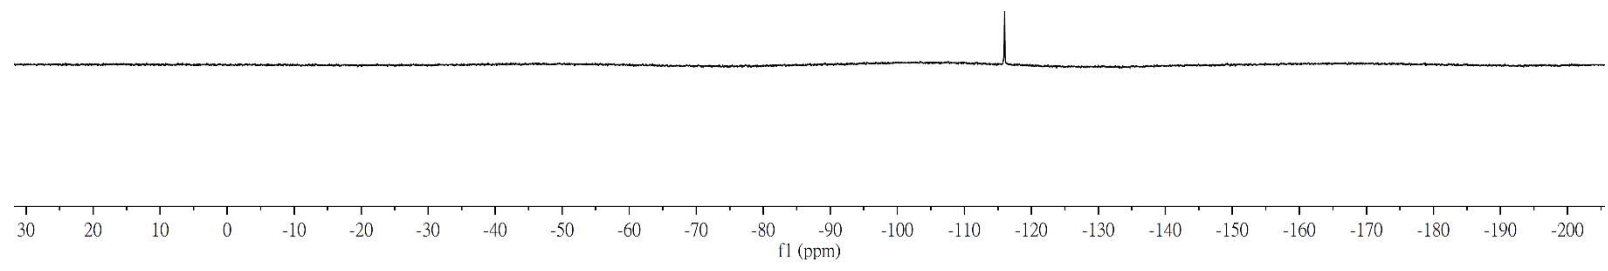



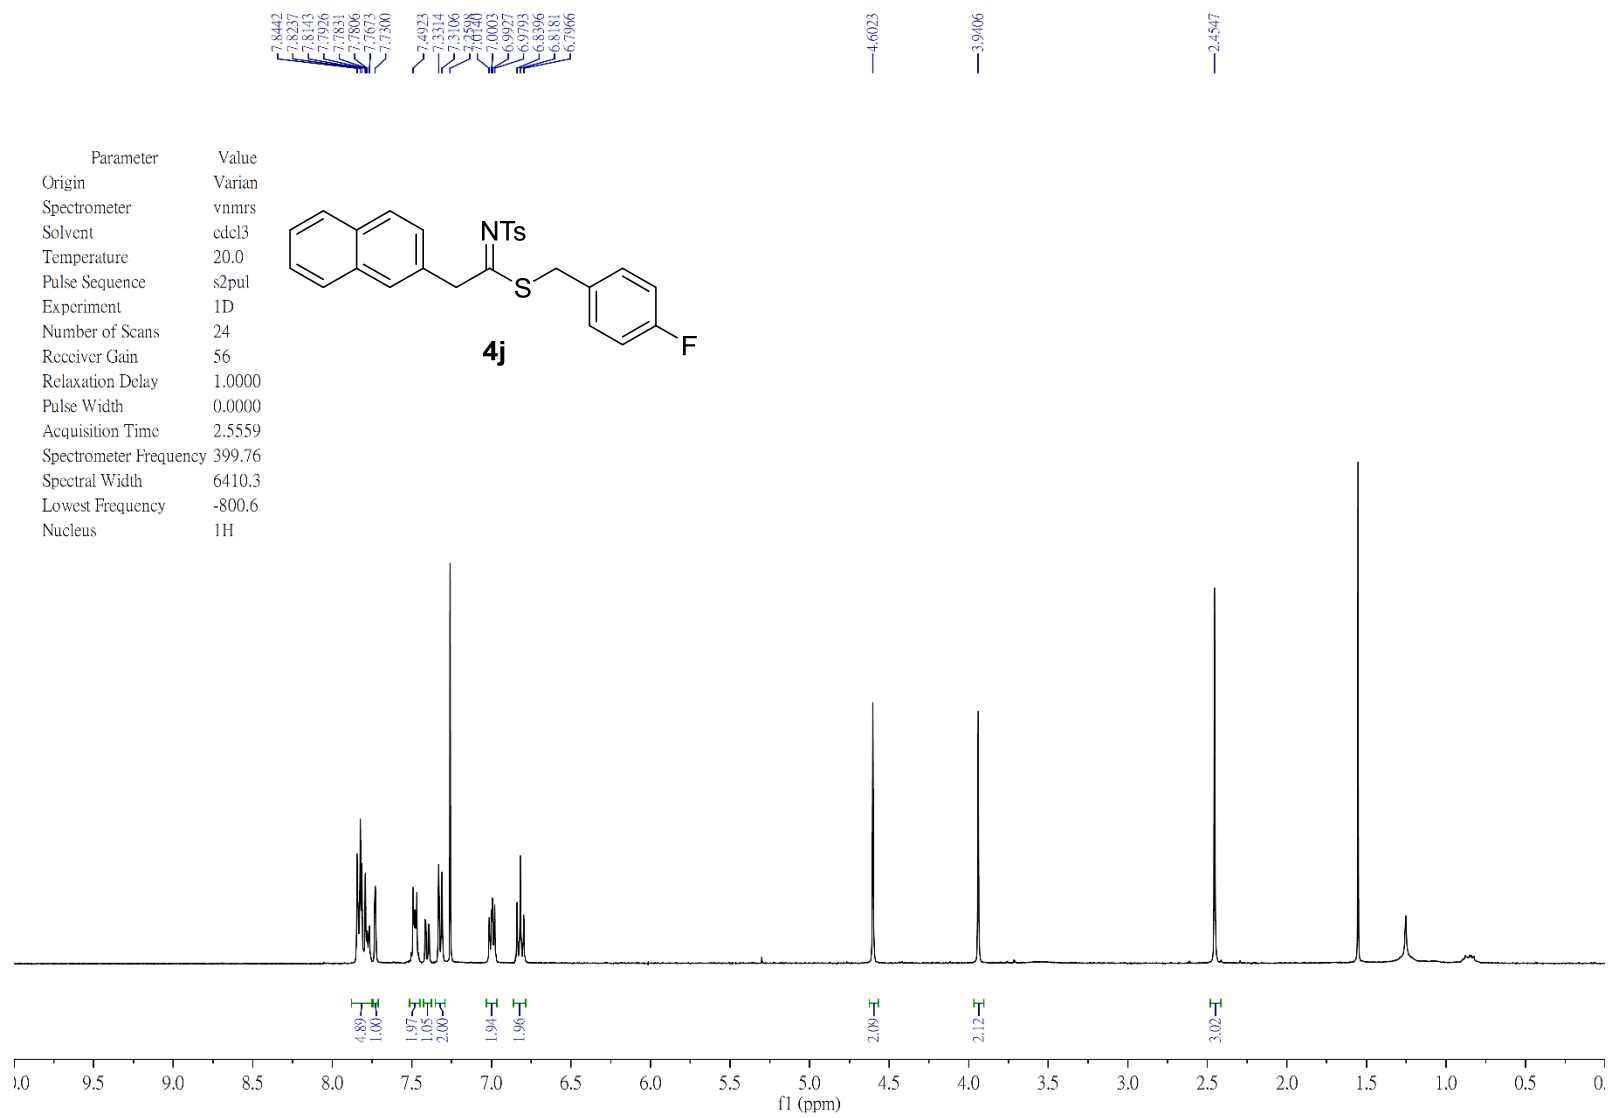

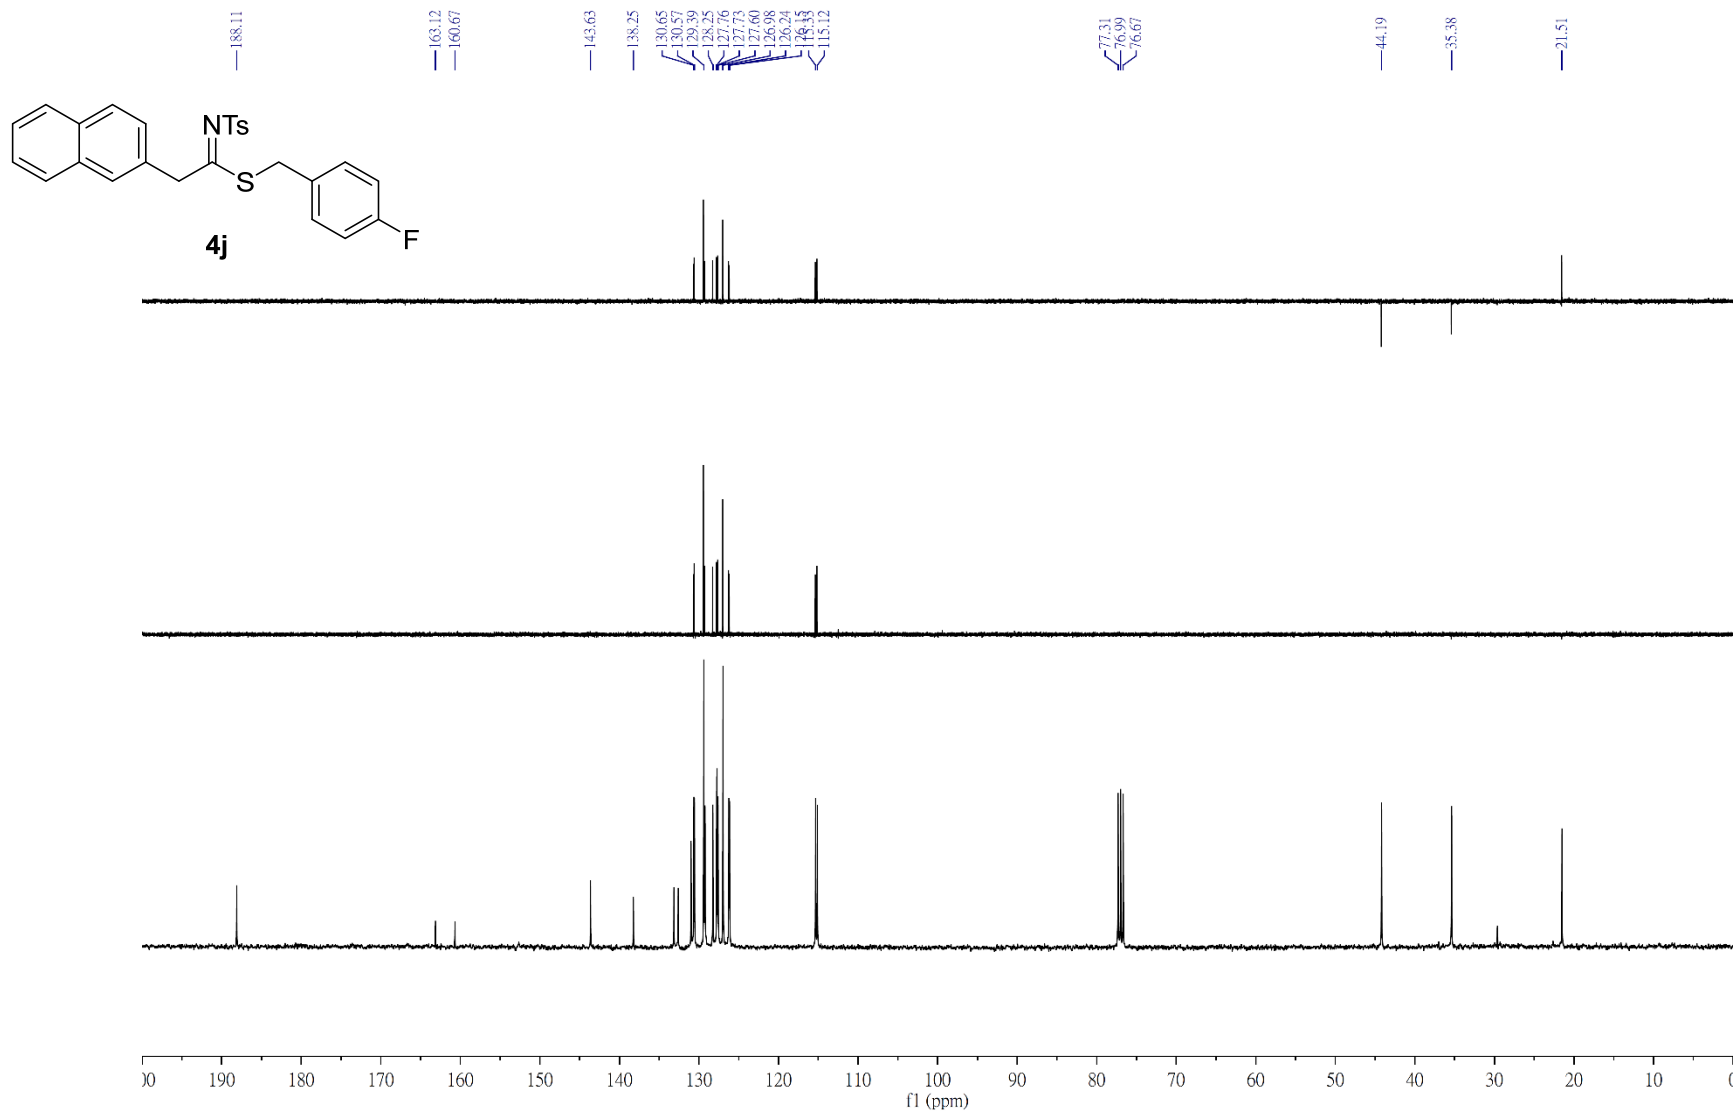

| Parameter              | Value    |
|------------------------|----------|
| Origin                 | Varian   |
| Spectrometer           | nmr      |
| Solvent                | cdcl3    |
| Temperature            | 20.0     |
| Pulse Sequence         | s2pul    |
| Experiment             | 1D       |
| Number of Scans        | 8        |
| Receiver Gain          | 60       |
| Relaxation Delay       | 1.0000   |
| Pulse Width            | 0.0000   |
| Acquisition Time       | 0.7340   |
| Spectrometer Frequency | 376.11   |
| Spectral Width         | 89285.7  |
| Lowest Frequency       | -77332.4 |
| Nucleus                | 19F      |

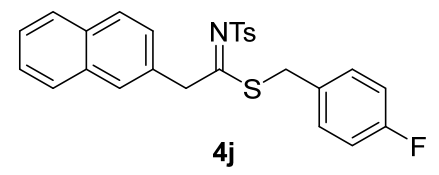

-115.976

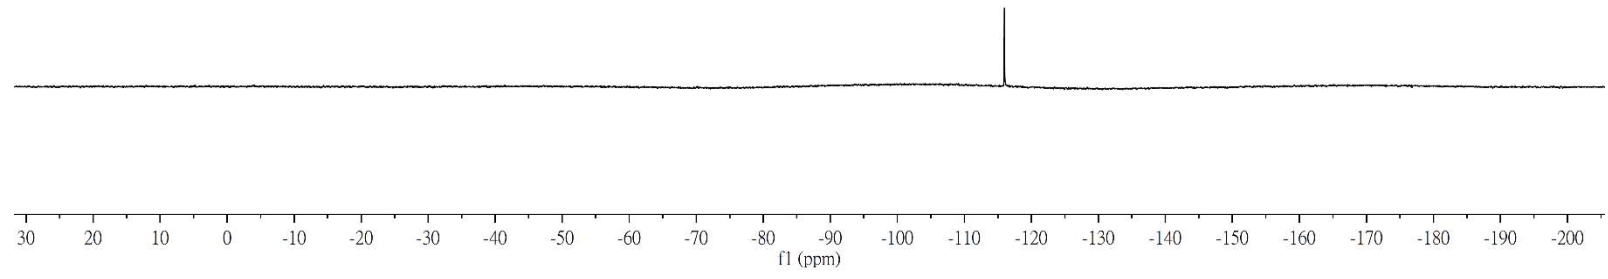

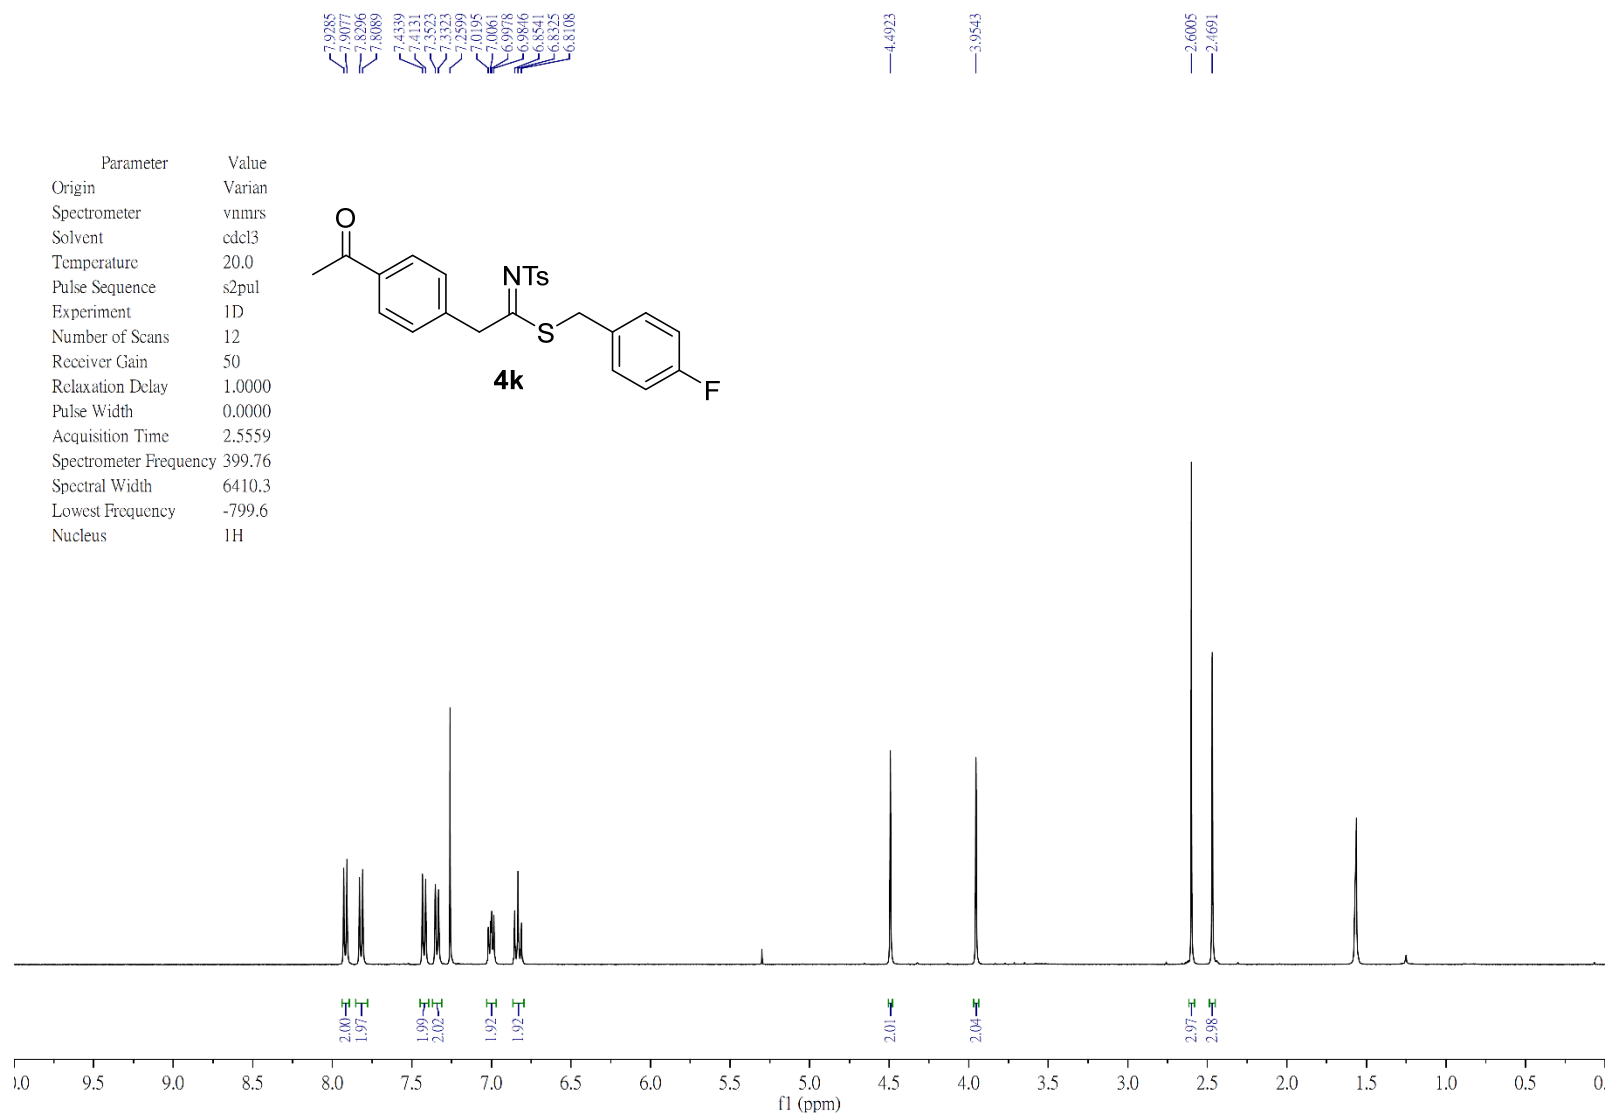

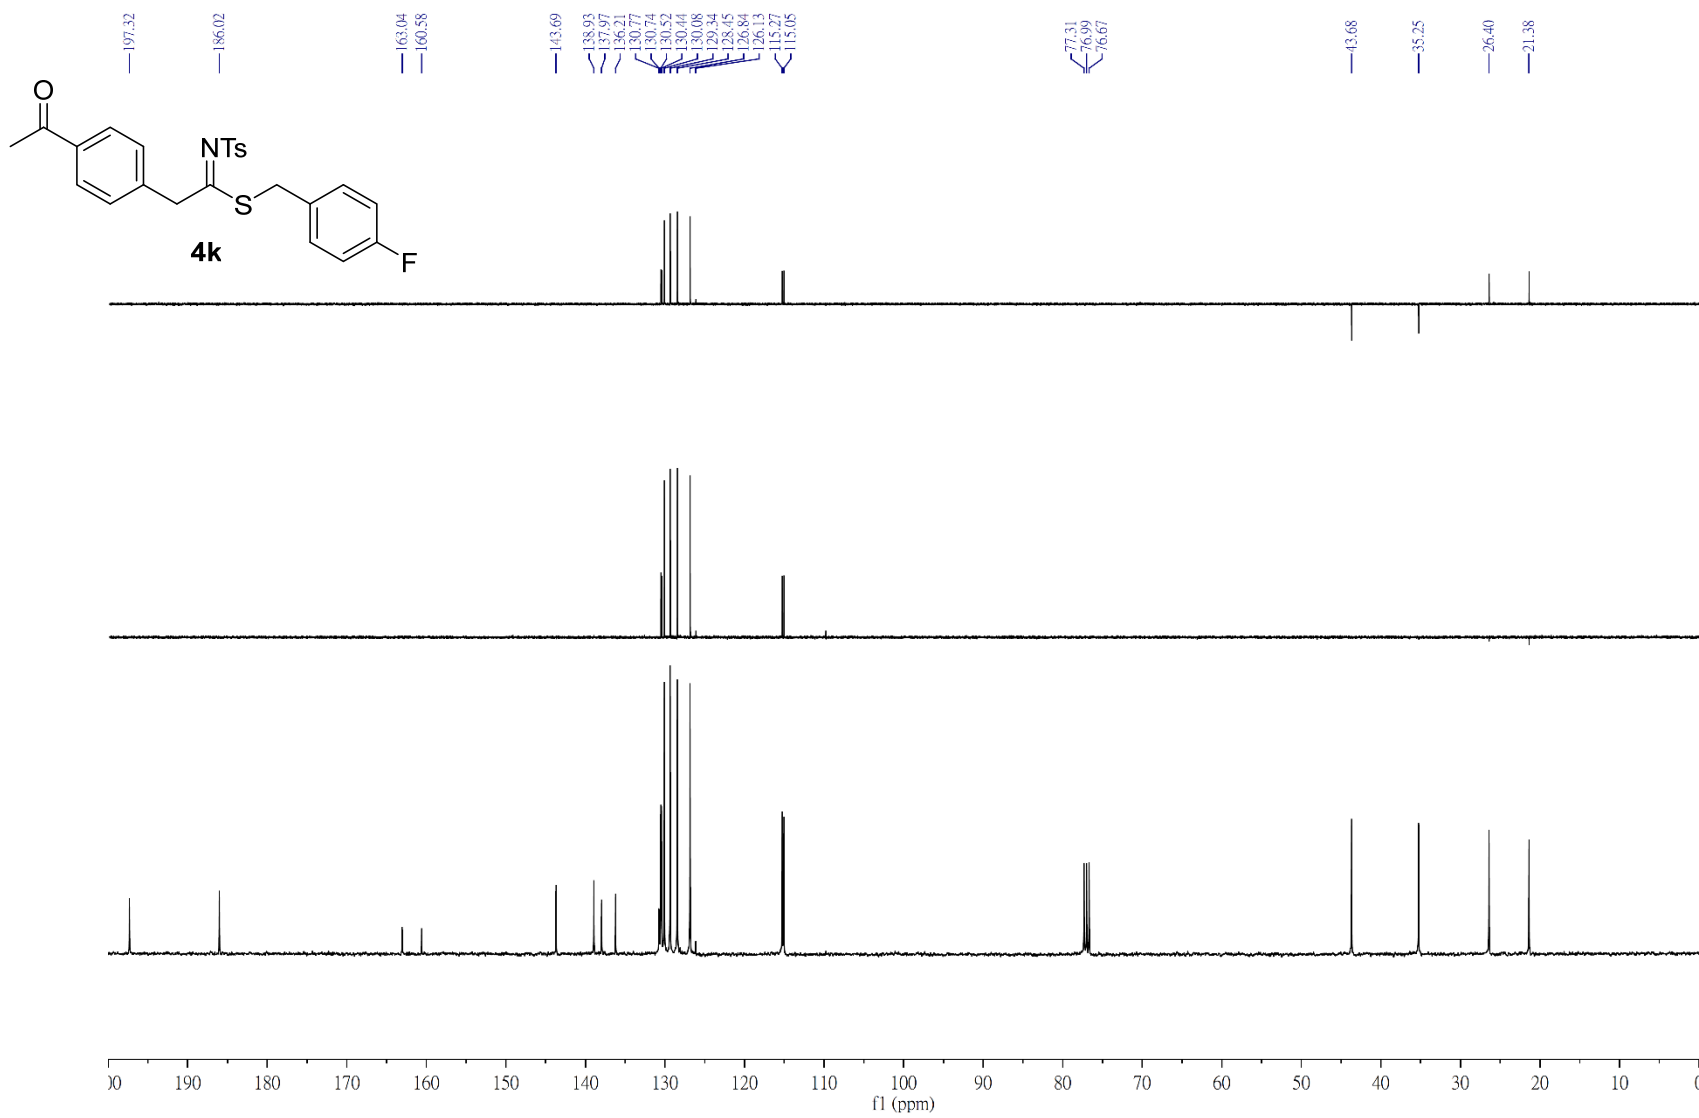

| Parameter              | Value    |
|------------------------|----------|
| Origin                 | Varian   |
| Spectrometer           | vnmrs    |
| Solvent                | cdcl3    |
| Temperature            | 20.0     |
| Pulse Sequence         | s2pul    |
| Experiment             | 1D       |
| Number of Scans        | 4        |
| Receiver Gain          | 60       |
| Relaxation Delay       | 1.0000   |
| Pulse Width            | 0.0000   |
| Acquisition Time       | 0.7340   |
| Spectrometer Frequency | 376.11   |
| Spectral Width         | 89285.7  |
| Lowest Frequency       | -77332.4 |
| Nucleus                | 19F      |

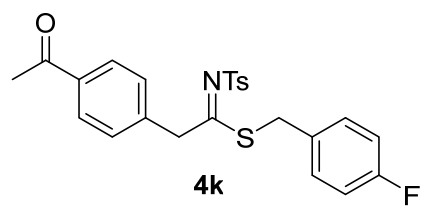

-115.705

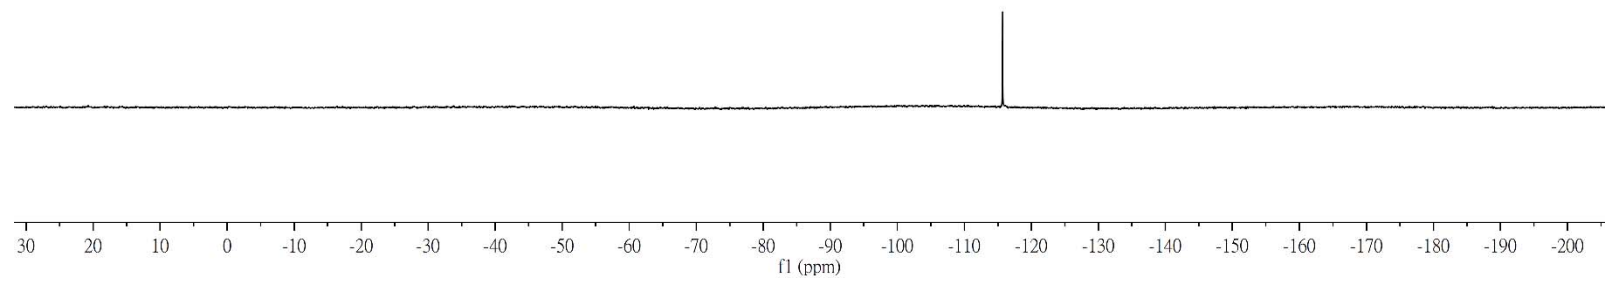

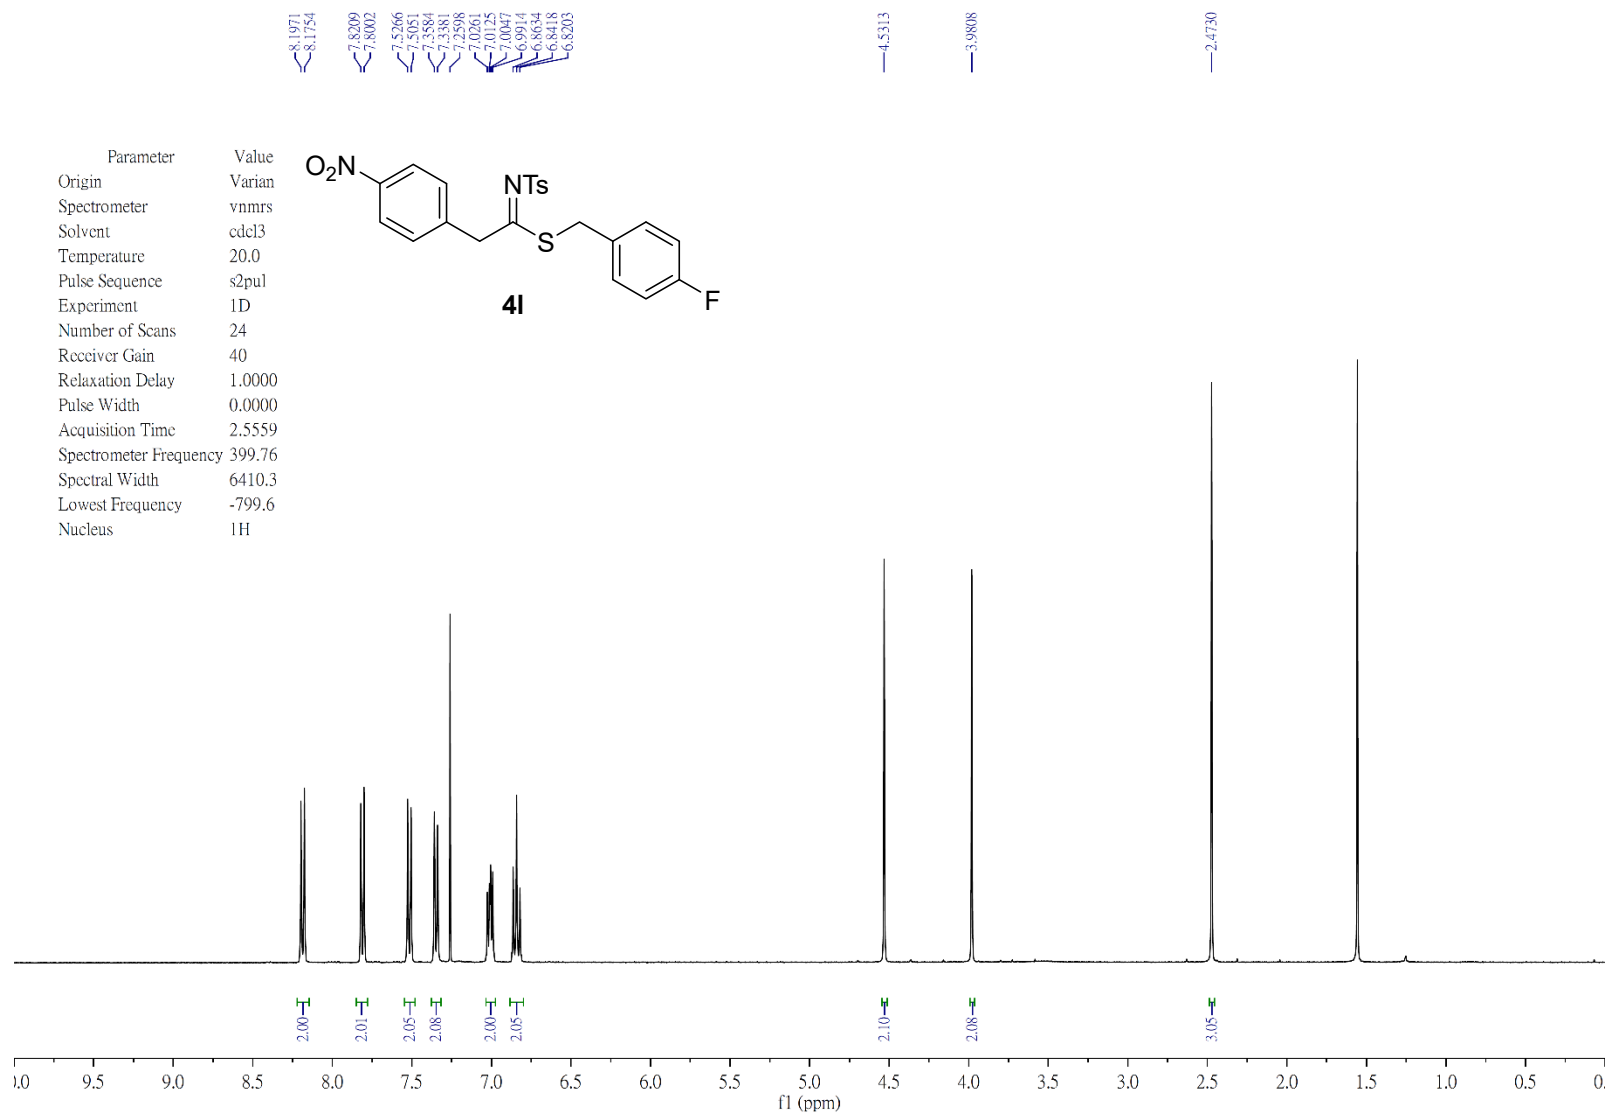

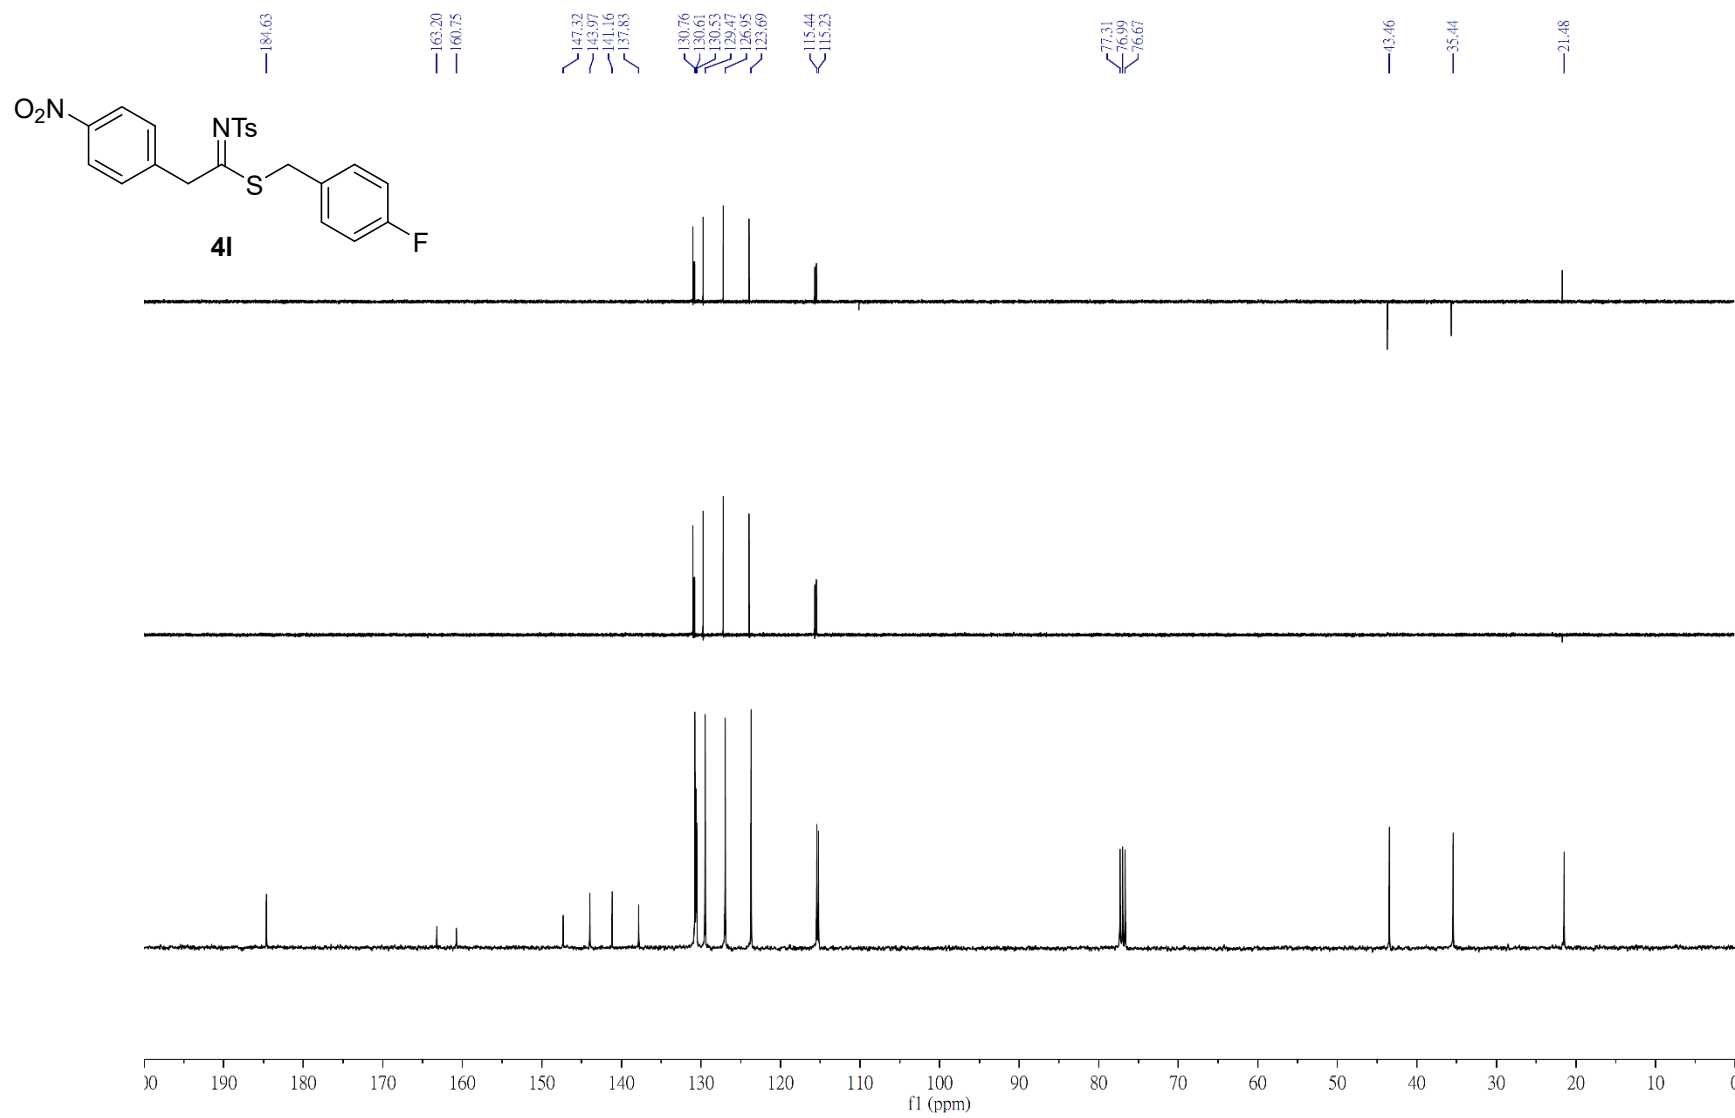



| Parameter              | Value    |
|------------------------|----------|
| Origin                 | Varian   |
| Spectrometer           | vnmrs    |
| Solvent                | c6d6     |
| Temperature            | 20.0     |
| Pulse Sequence         | s2pul    |
| Experiment             | 1D       |
| Number of Scans        | 196      |
| Receiver Gain          | 60       |
| Relaxation Delay       | 1.0000   |
| Pulse Width            | 0.0000   |
| Acquisition Time       | 0.7340   |
| Spectrometer Frequency | 376.11   |
| Spectral Width         | 89285.7  |
| Lowest Frequency       | -77133.5 |
| Nucleus                | 19F      |

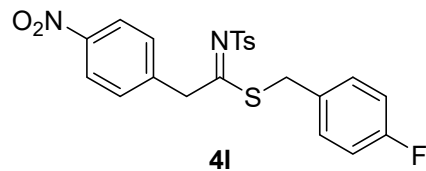

— 114.485

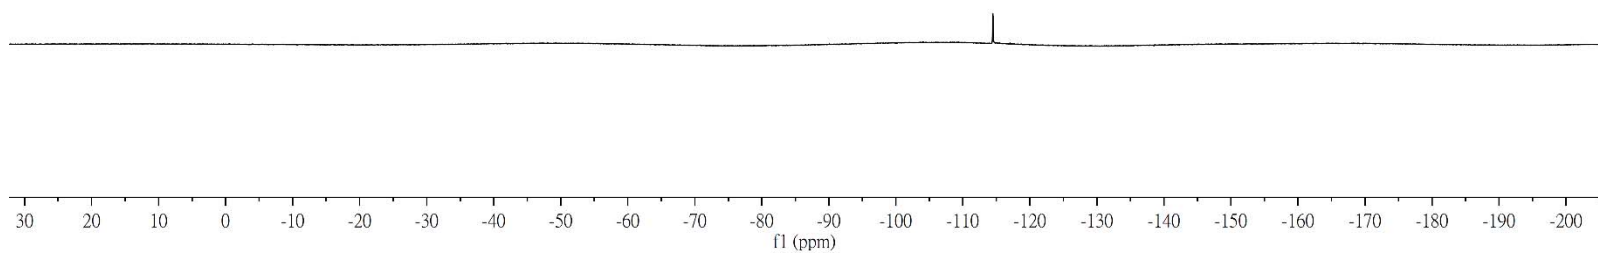

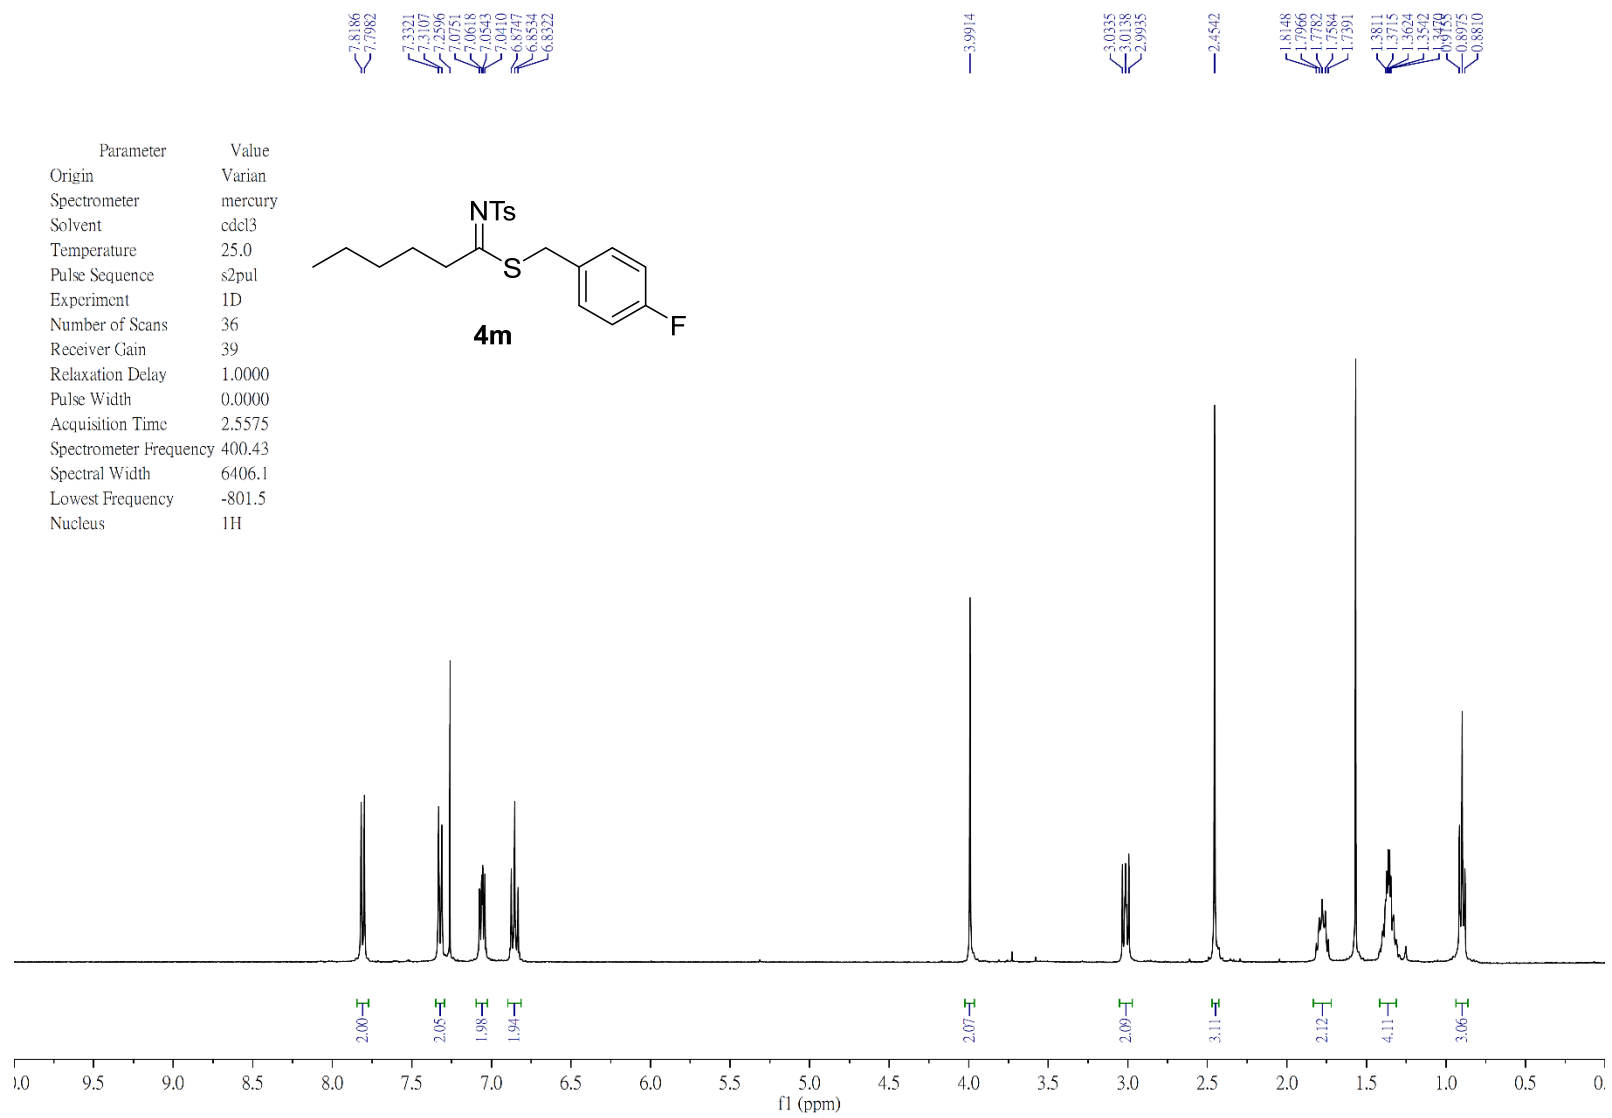

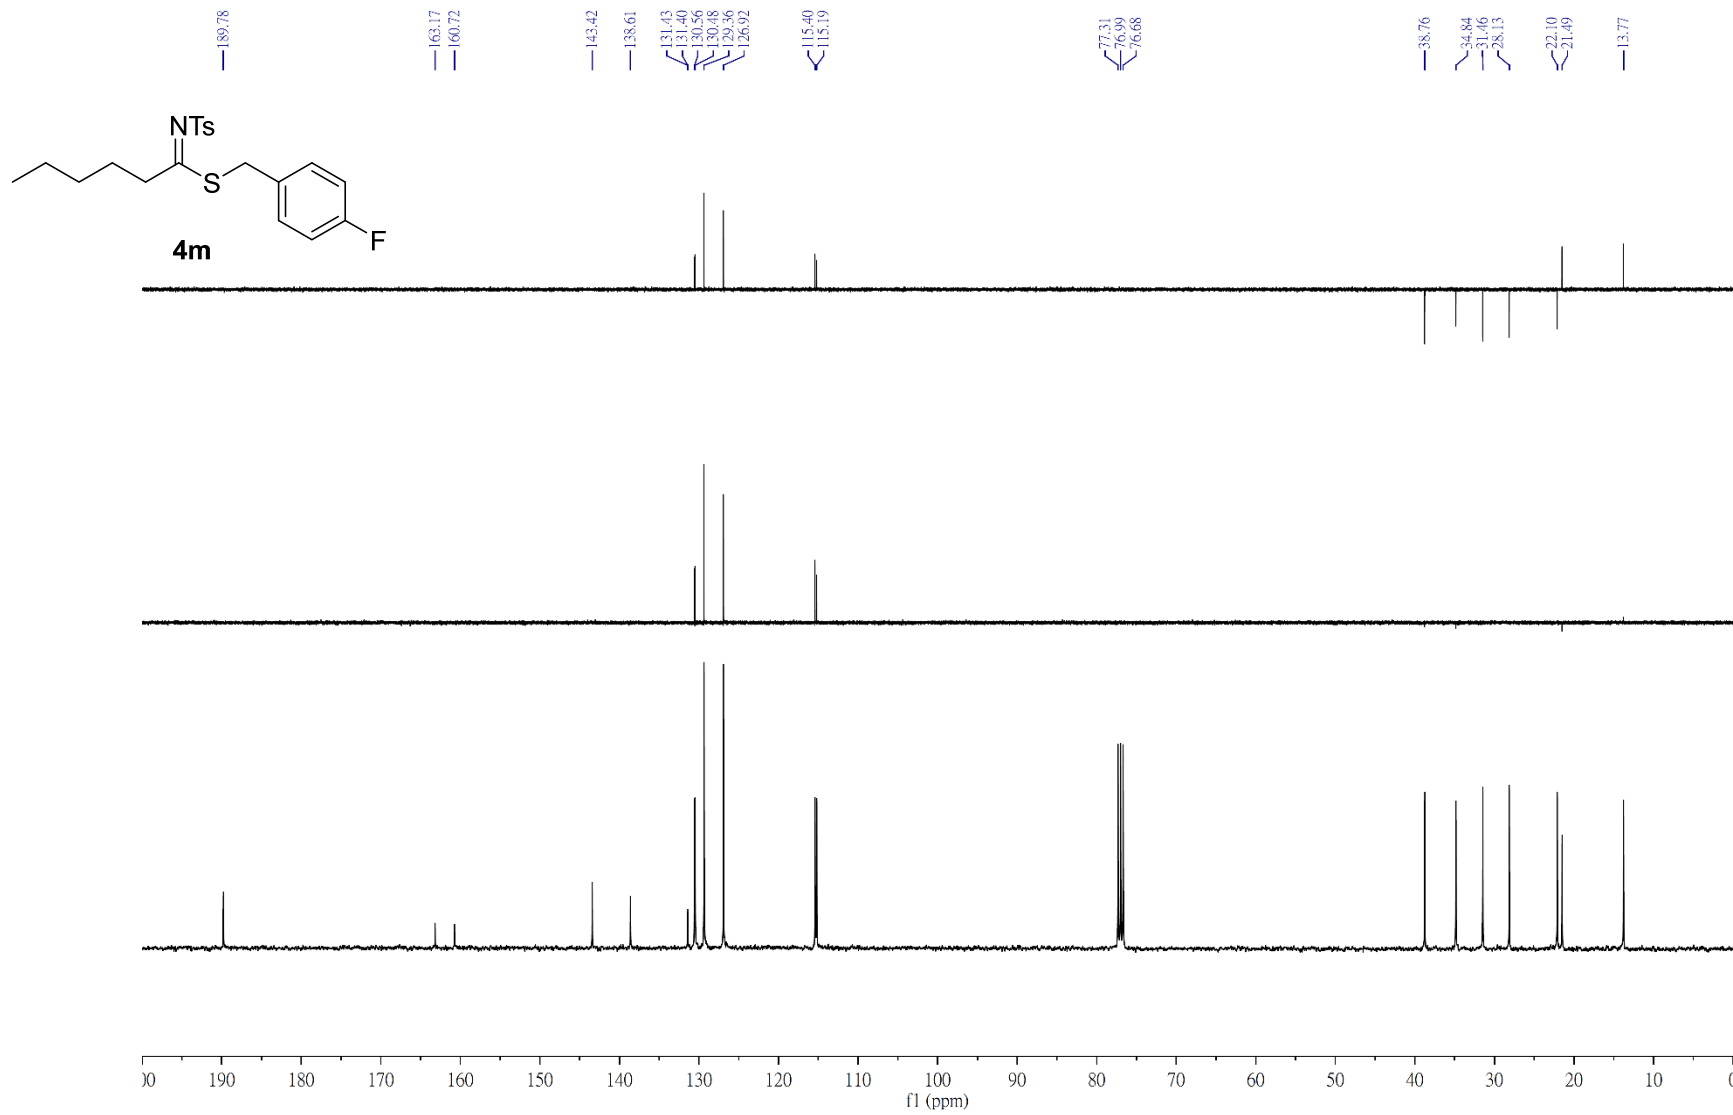

| Parameter              | Value    |
|------------------------|----------|
| Origin                 | Varian   |
| Spectrometer           | vnmrs    |
| Solvent                | cdcl3    |
| Temperature            | 20.0     |
| Pulse Sequence         | s2pul    |
| Experiment             | 1D       |
| Number of Scans        | 8        |
| Receiver Gain          | 60       |
| Relaxation Delay       | 1.0000   |
| Pulse Width            | 0.0000   |
| Acquisition Time       | 0.7340   |
| Spectrometer Frequency | 376.11   |
| Spectral Width         | 89285.7  |
| Lowest Frequency       | -77332.4 |
| Nucleus                | 19F      |

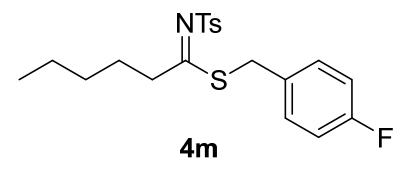

-116.046

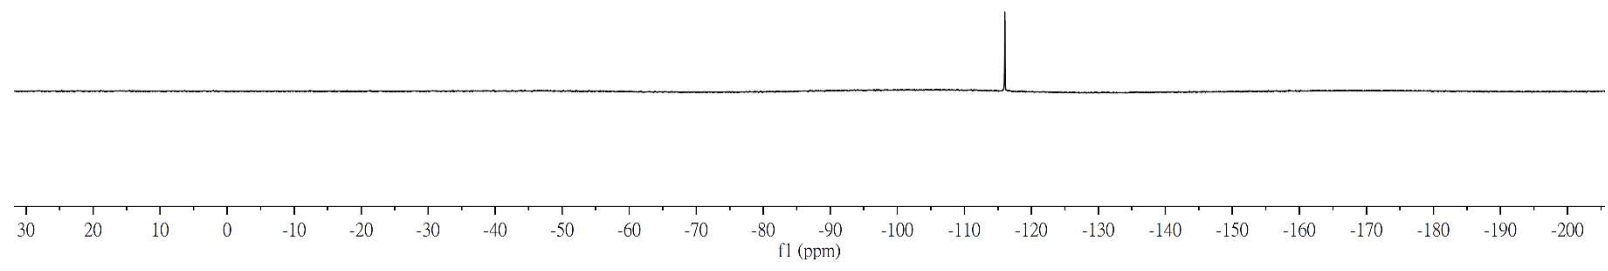

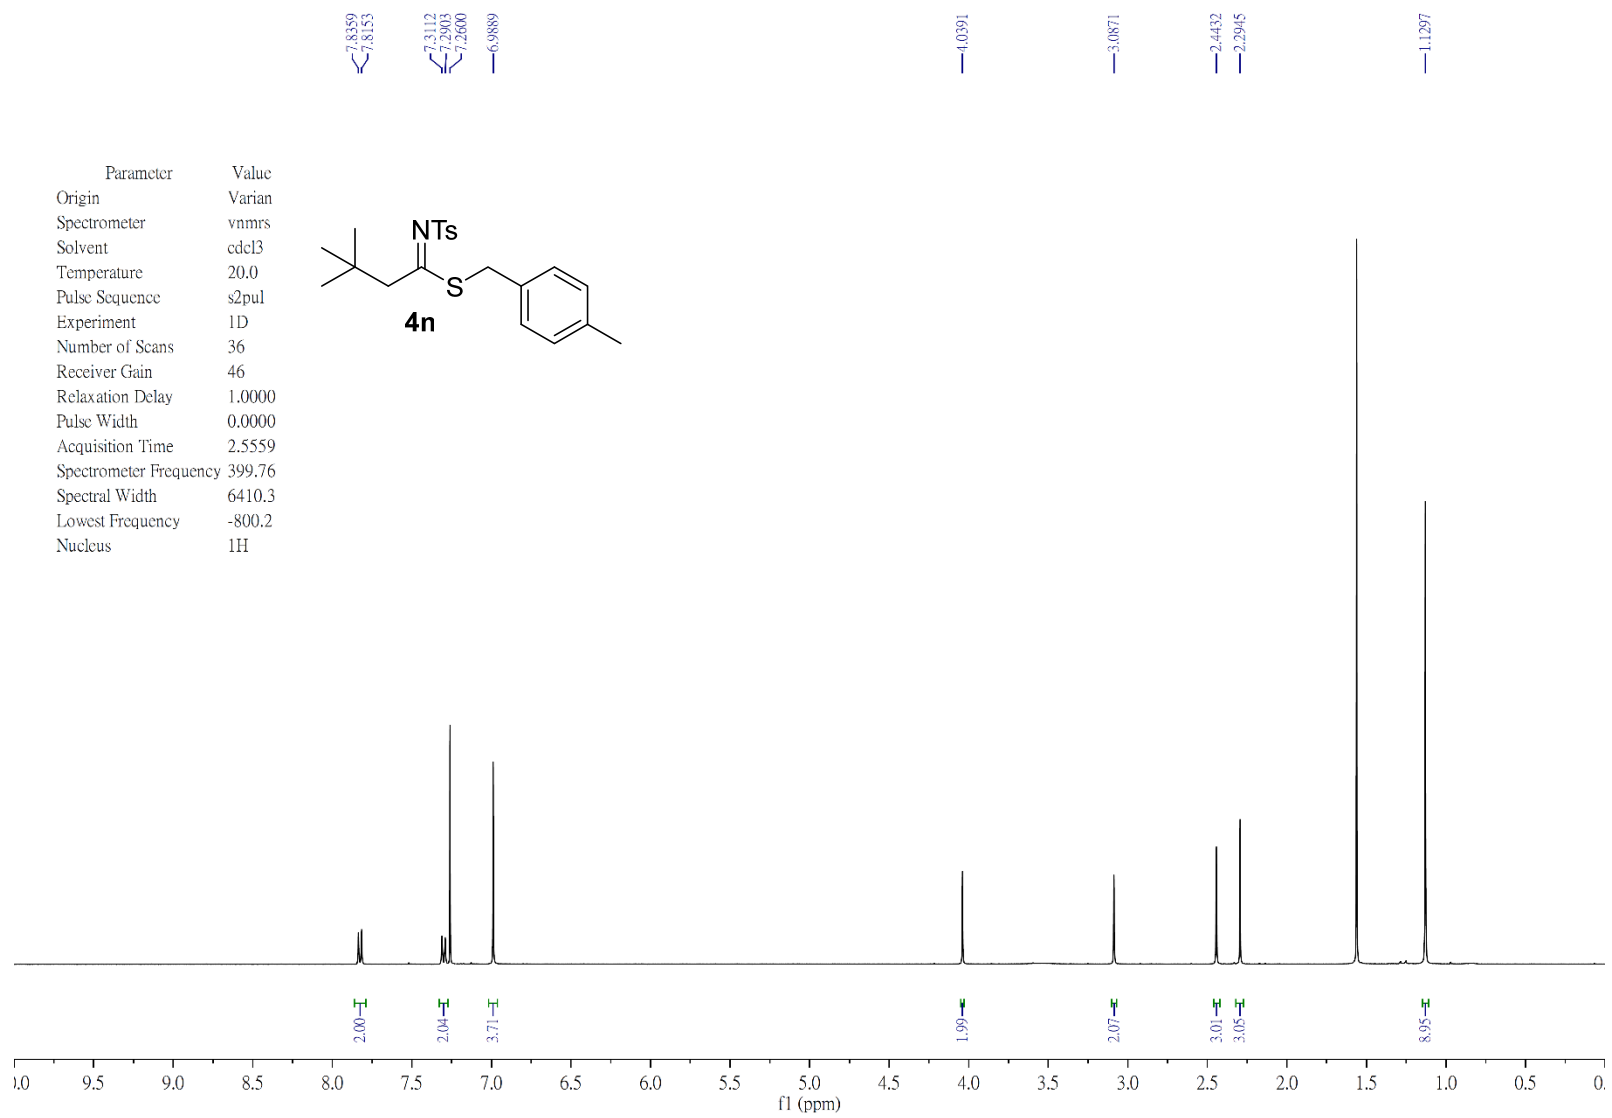

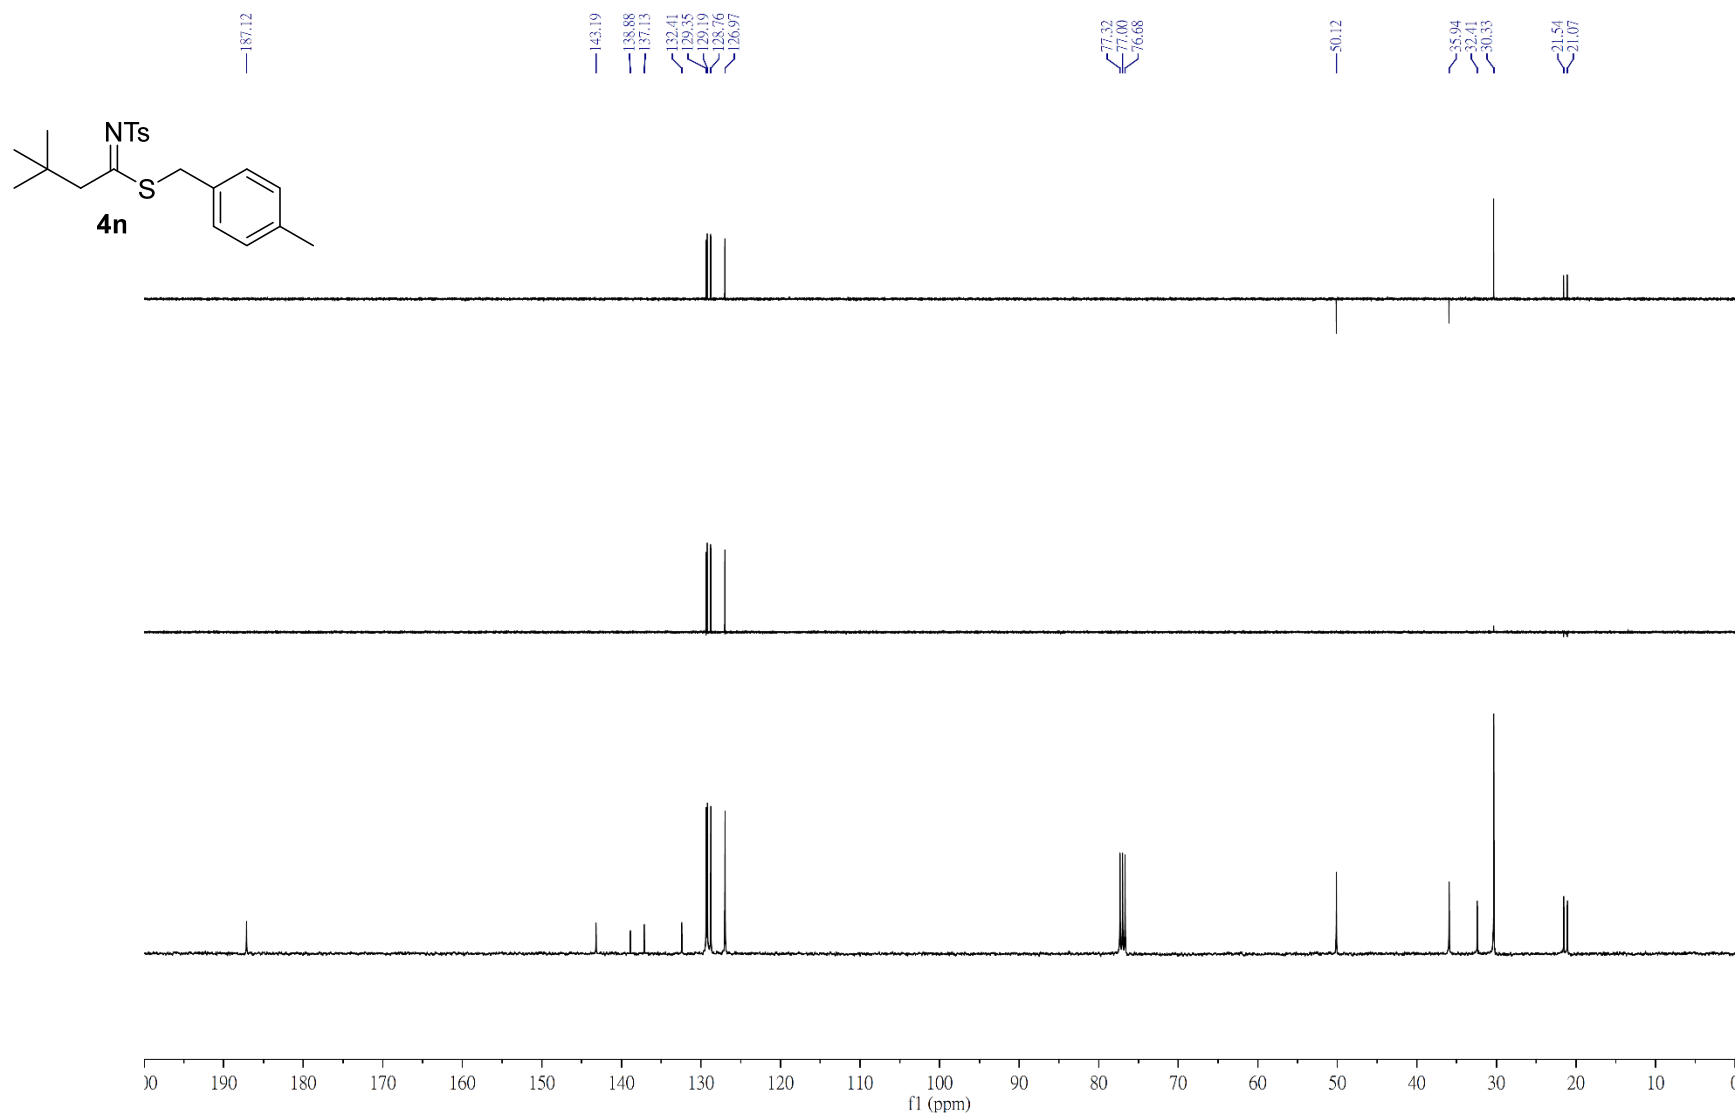

| Parameter              | Value          |
|------------------------|----------------|
| Origin                 | Varian         |
| Spectrometer           | nmr5           |
| Solvent                | cdcl3          |
| Temperature            | 20.0           |
| Pulse Sequence         | s2pul          |
| Experiment             | 1D             |
| Number of Scans        | 20             |
| Receiver Gain          | 30             |
| Relaxation Delay       | 1.0000         |
| Pulse Width            | 0.0000         |
| Acquisition Time       | 2.5559         |
| Spectrometer Frequency | 399.76         |
| Spectral Width         | 6410.3         |
| Lowest Frequency       | -806.6         |
| Nucleus                | <sup>1</sup> H |

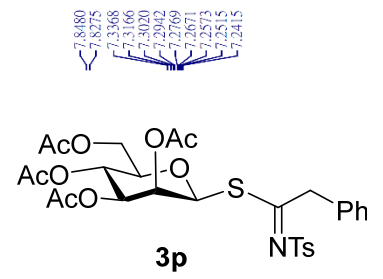

7.8480  
7.8275  
7.3368  
7.3166  
7.3020  
7.2942  
7.2789  
7.2671  
7.2573  
7.2515  
7.2415

5.3380  
5.3309  
5.2724  
5.1474  
5.1223  
5.0972  
4.9374  
4.9288  
4.9122  
4.9036

4.4931  
4.4524  
4.3182  
4.2775  
4.1212  
4.1036  
4.0899  
3.8328  
3.8284  
3.8017  
3.6906  
3.4476  
3.4163  
3.3501  
3.2550  
3.2466  
3.2419

2.4340  
2.0428  
2.0290  
1.9744  
1.9044

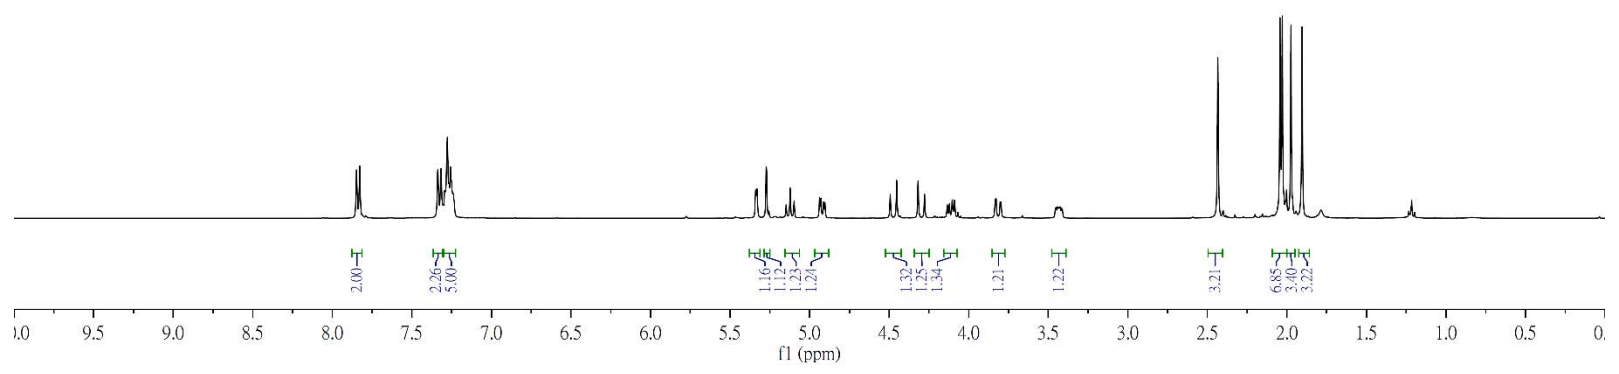

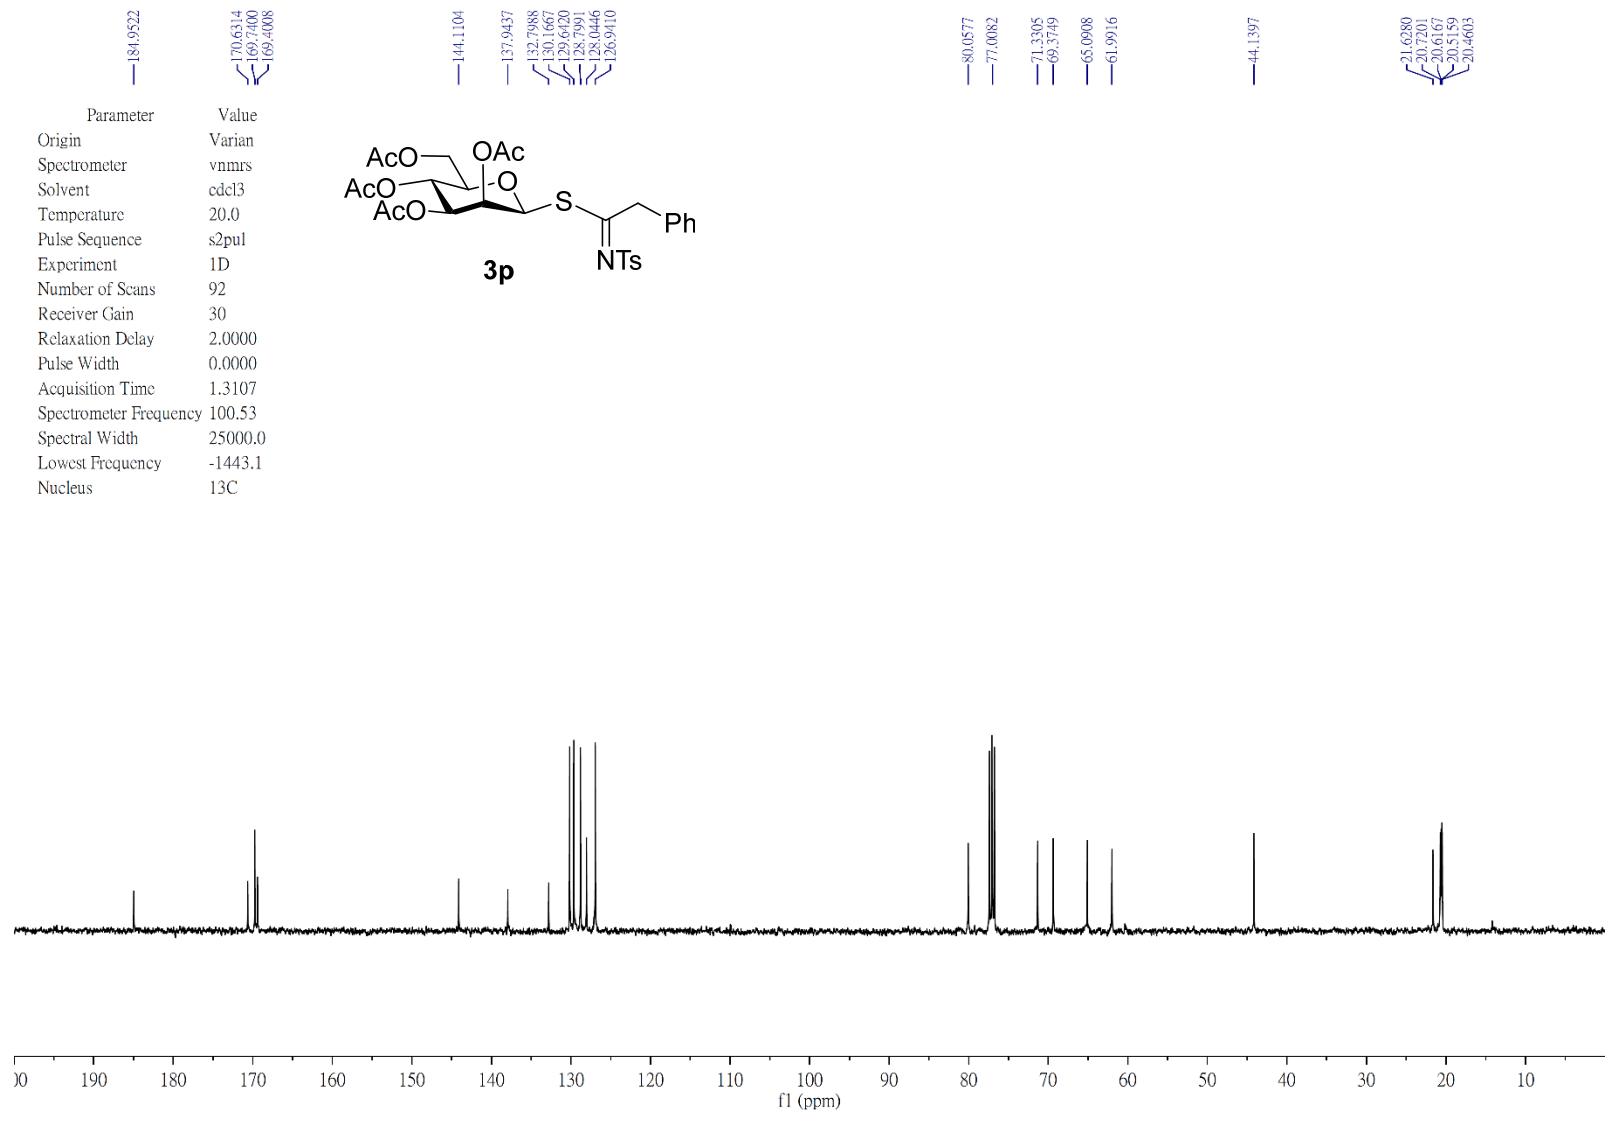

| Parameter              | Value           |
|------------------------|-----------------|
| Origin                 | Varian          |
| Spectrometer           | vnmrs           |
| Solvent                | cdcl3           |
| Temperature            | 20.0            |
| Pulse Sequence         | s2pul           |
| Experiment             | 1D              |
| Number of Scans        | 92              |
| Receiver Gain          | 30              |
| Relaxation Delay       | 2.0000          |
| Pulse Width            | 0.0000          |
| Acquisition Time       | 1.3107          |
| Spectrometer Frequency | 100.53          |
| Spectral Width         | 25000.0         |
| Lowest Frequency       | -1443.1         |
| Nucleus                | <sup>13</sup> C |

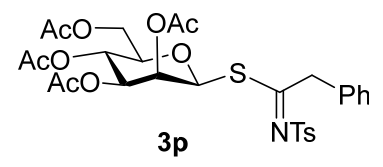



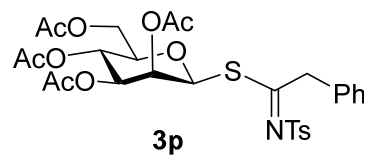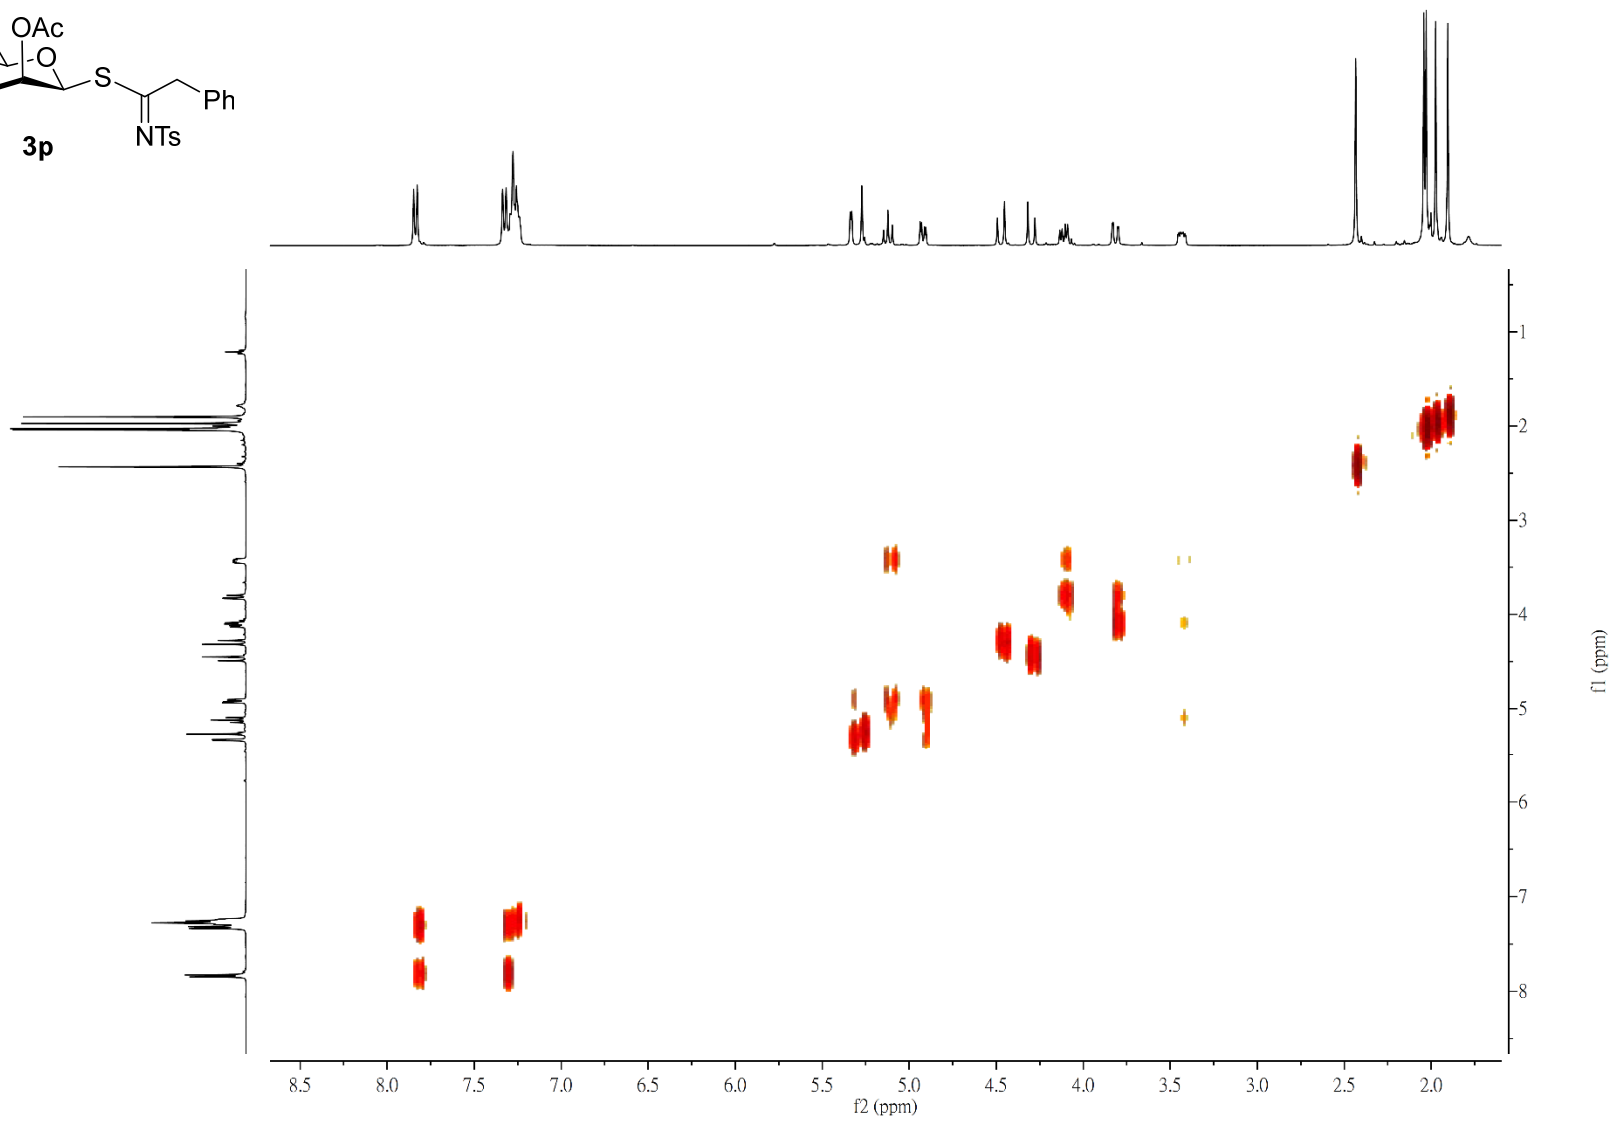

| Parameter              | Value  |
|------------------------|--------|
| Origin                 | Varian |
| Spectrometer           | nmrs   |
| Solvent                | cdcl3  |
| Temperature            | 20.0   |
| Pulse Sequence         | s2pul  |
| Experiment             | 1D     |
| Number of Scans        | 16     |
| Receiver Gain          | 46     |
| Relaxation Delay       | 1.0000 |
| Pulse Width            | 0.0000 |
| Acquisition Time       | 2.5559 |
| Spectrometer Frequency | 399.76 |
| Spectral Width         | 6410.3 |
| Lowest Frequency       | -799.8 |
| Nucleus                | 1H     |
| Acquired Size          | 16384  |
| Spectral Size          | 32768  |

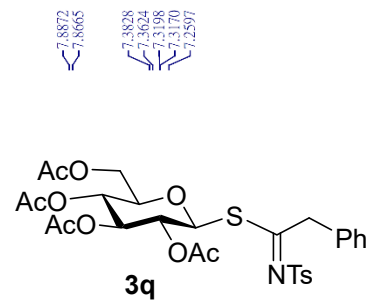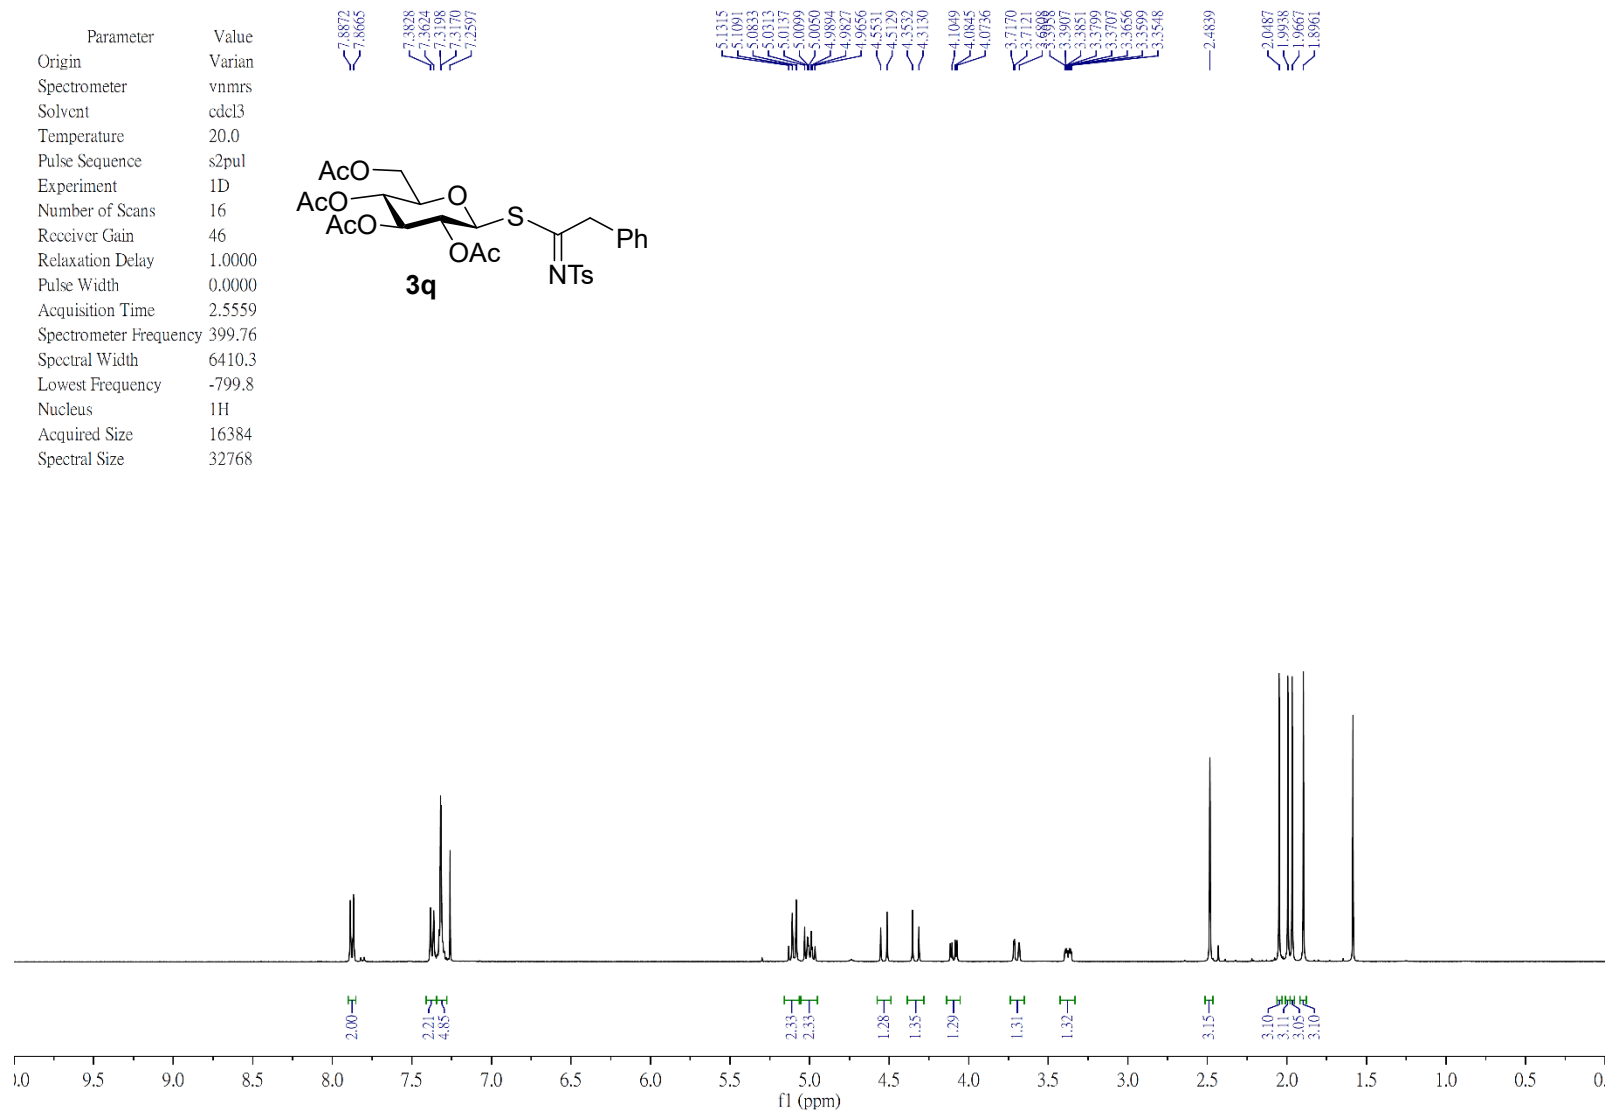

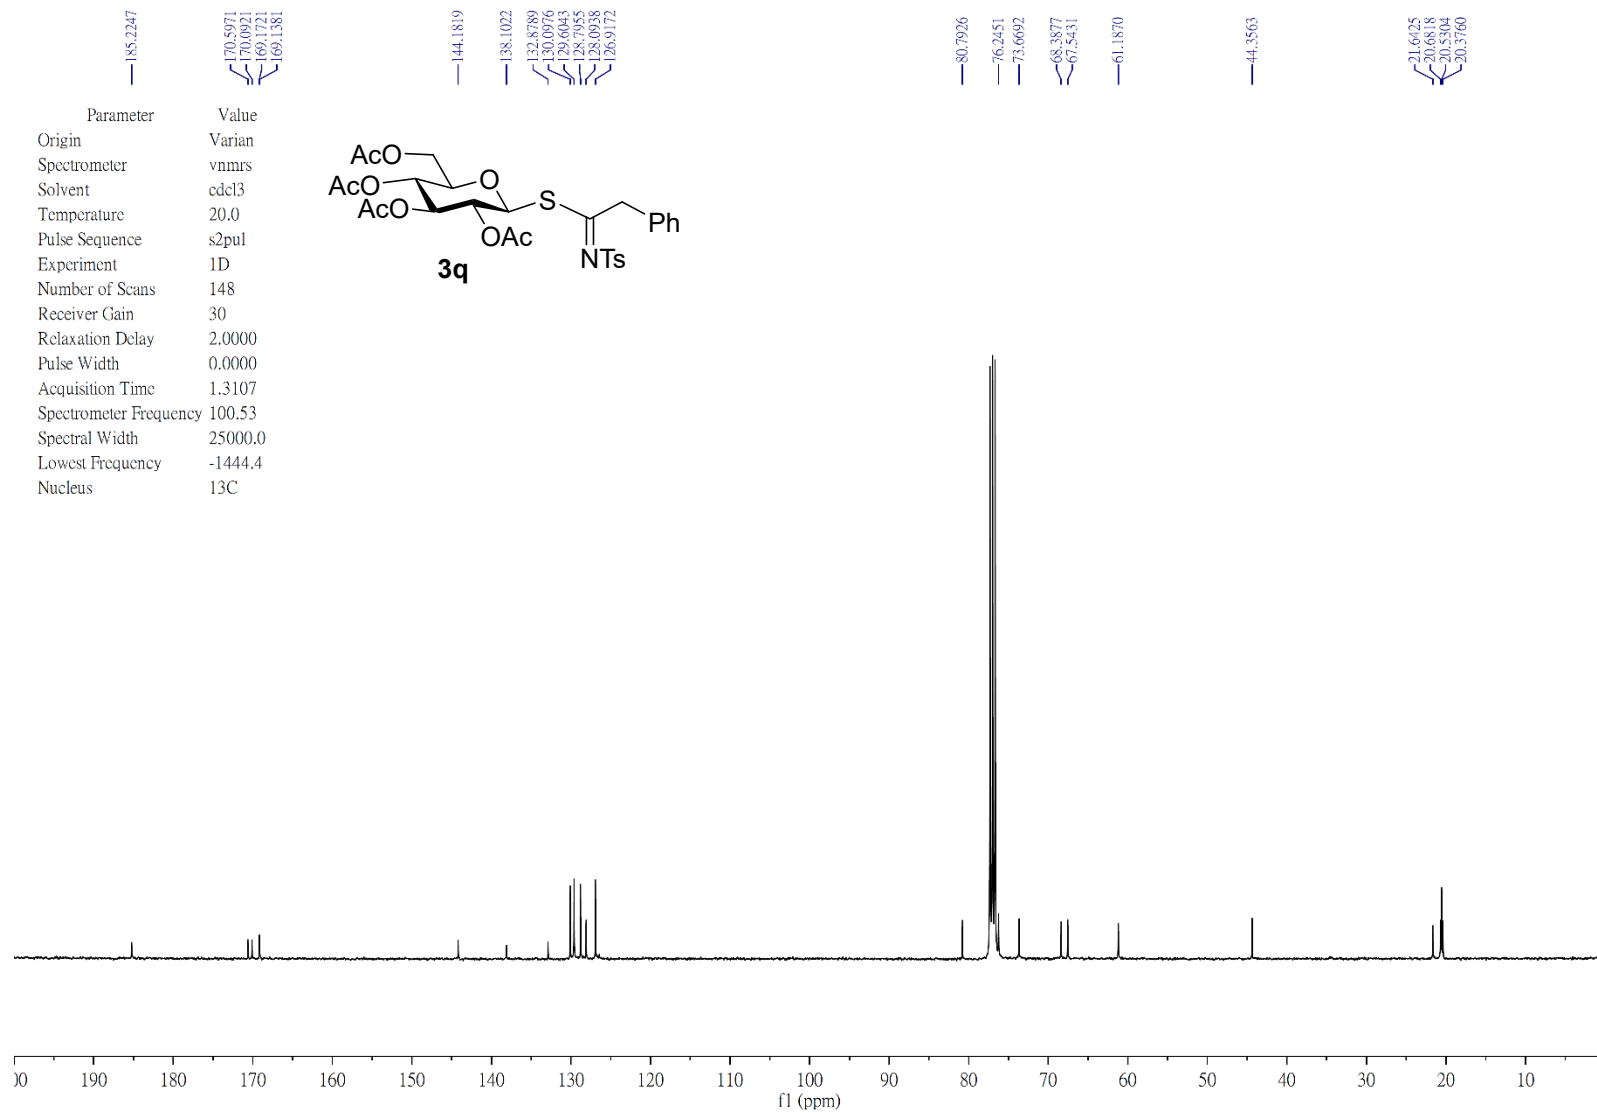

| Parameter              | Value   |
|------------------------|---------|
| Origin                 | Varian  |
| Spectrometer           | vnmrs   |
| Solvent                | cdcl3   |
| Temperature            | 20.0    |
| Pulse Sequence         | s2pul   |
| Experiment             | 1D      |
| Number of Scans        | 148     |
| Receiver Gain          | 30      |
| Relaxation Delay       | 2.0000  |
| Pulse Width            | 0.0000  |
| Acquisition Time       | 1.3107  |
| Spectrometer Frequency | 100.53  |
| Spectral Width         | 25000.0 |
| Lowest Frequency       | -1444.4 |
| Nucleus                | 13C     |

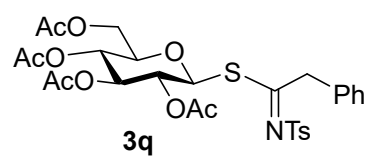

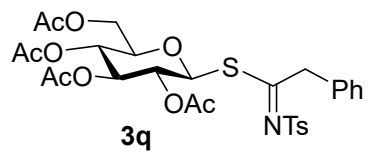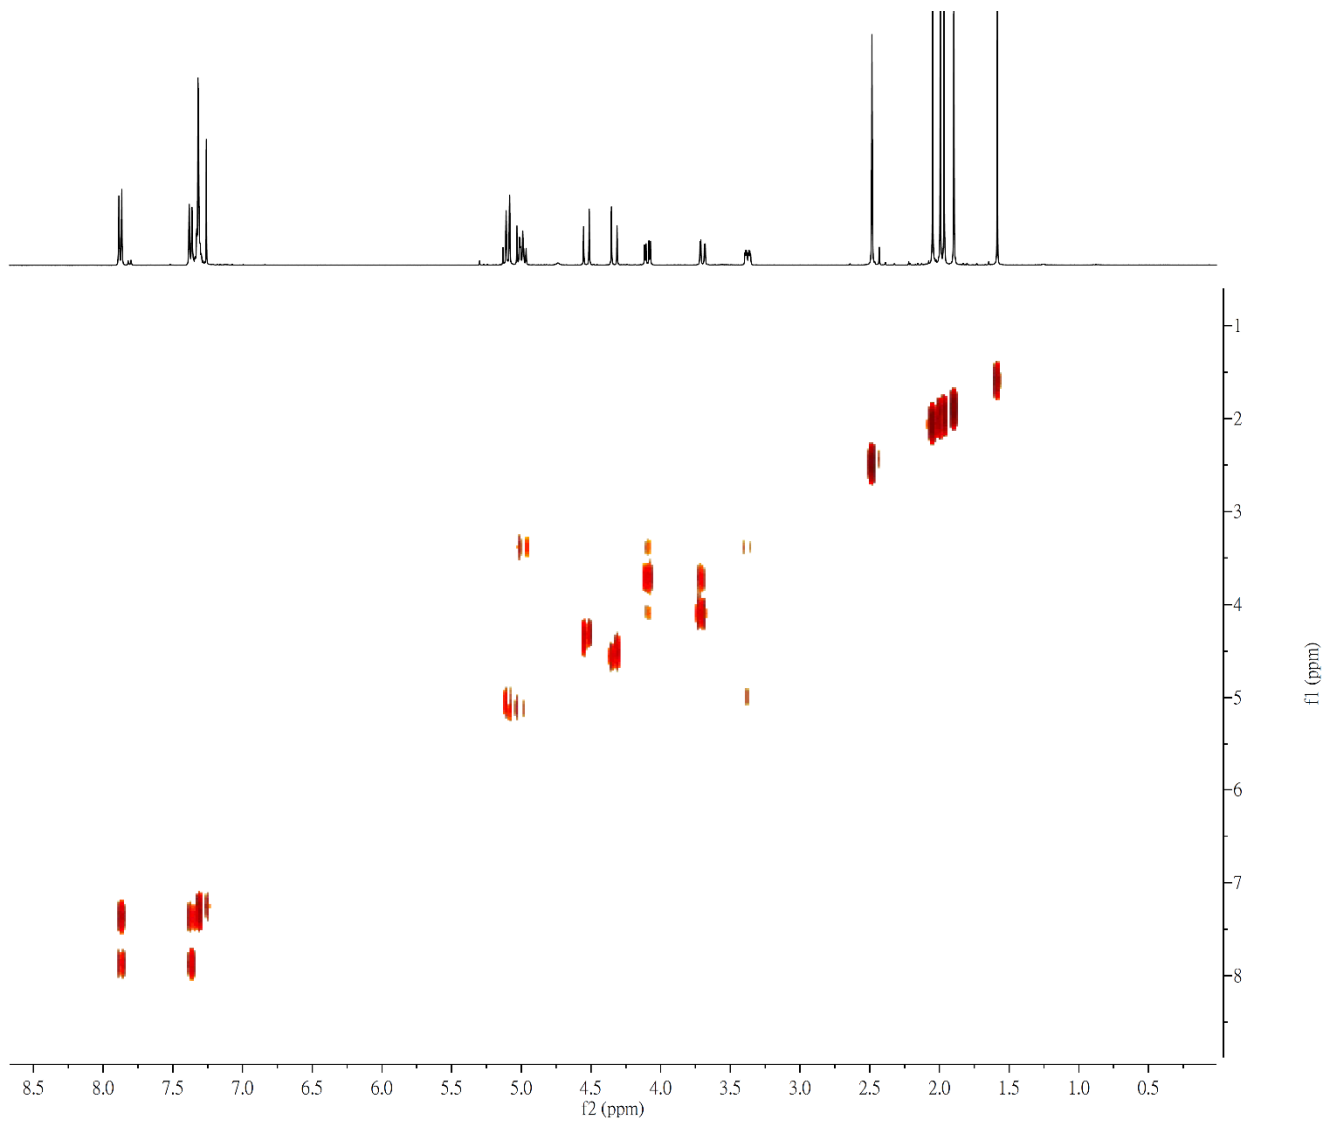

| Parameter              | Value  |
|------------------------|--------|
| Origin                 | Varian |
| Spectrometer           | nmrs   |
| Solvent                | cdcl3  |
| Temperature            | 20.0   |
| Pulse Sequence         | s2pul  |
| Experiment             | 1D     |
| Number of Scans        | 12     |
| Receiver Gain          | 30     |
| Relaxation Delay       | 1.0000 |
| Pulse Width            | 0.0000 |
| Acquisition Time       | 2.5559 |
| Spectrometer Frequency | 399.76 |
| Spectral Width         | 6410.3 |
| Lowest Frequency       | -813.3 |
| Nucleus                | 1H     |
| Acquired Size          | 16384  |
| Spectral Size          | 32768  |

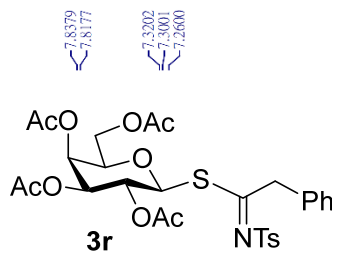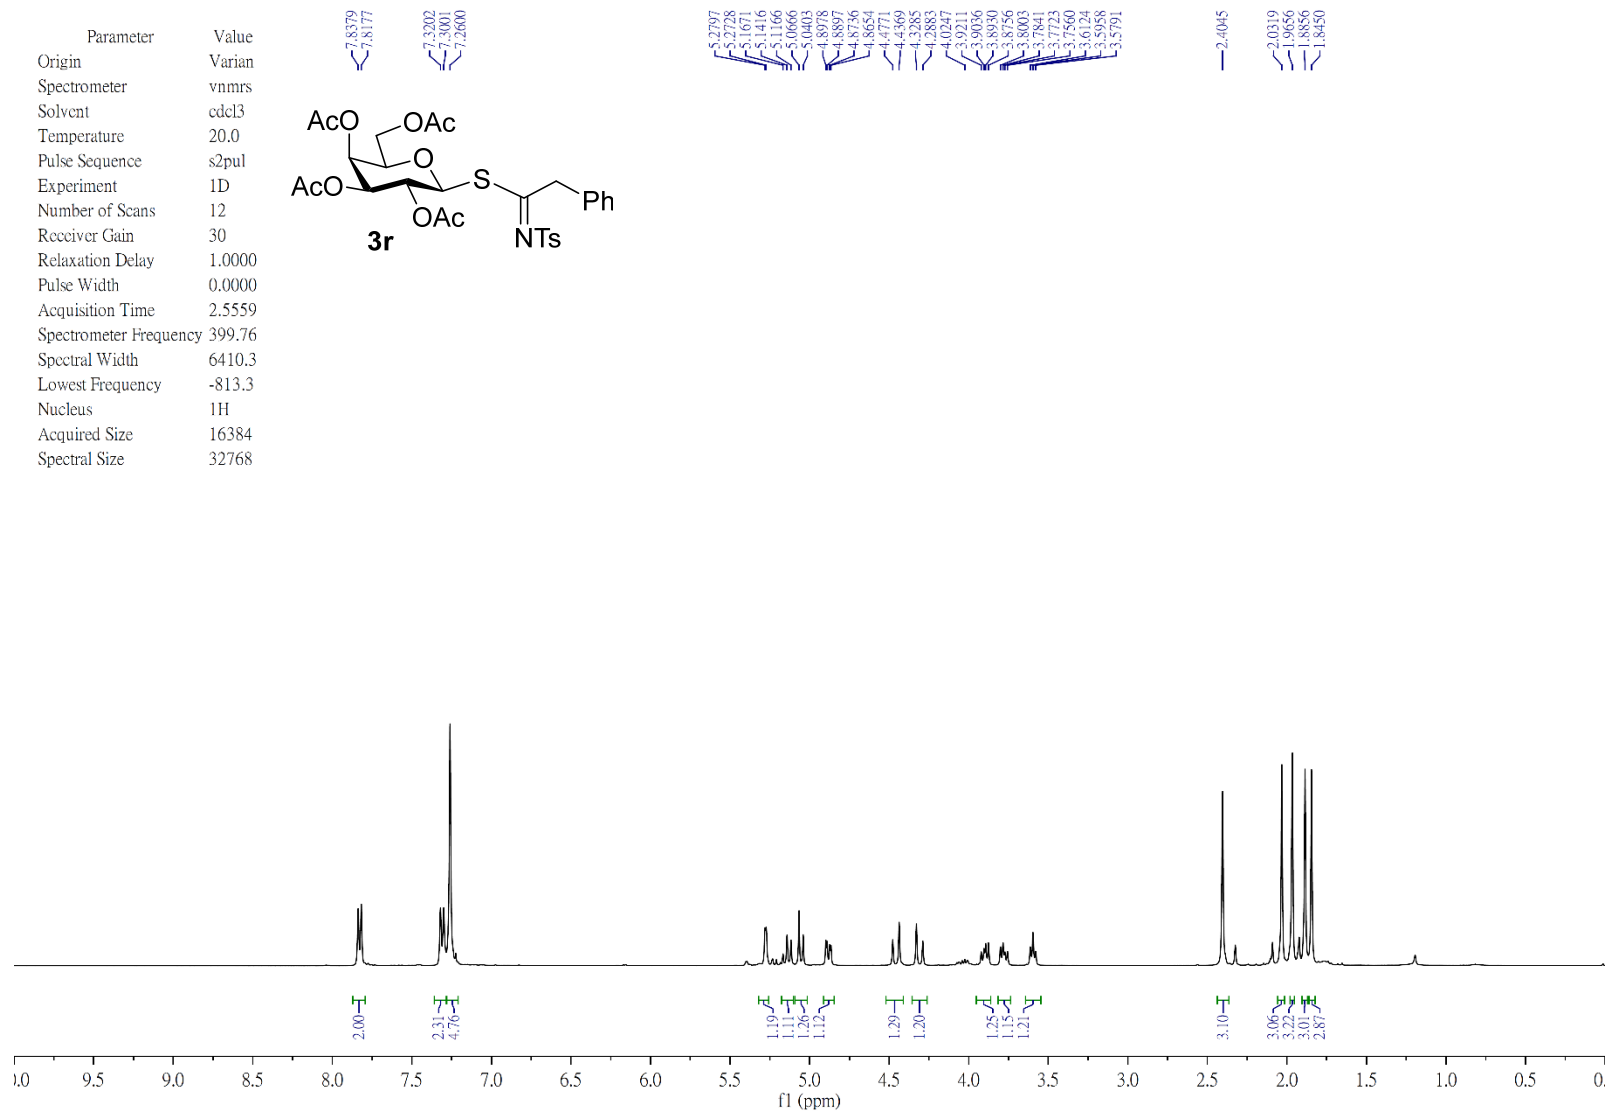

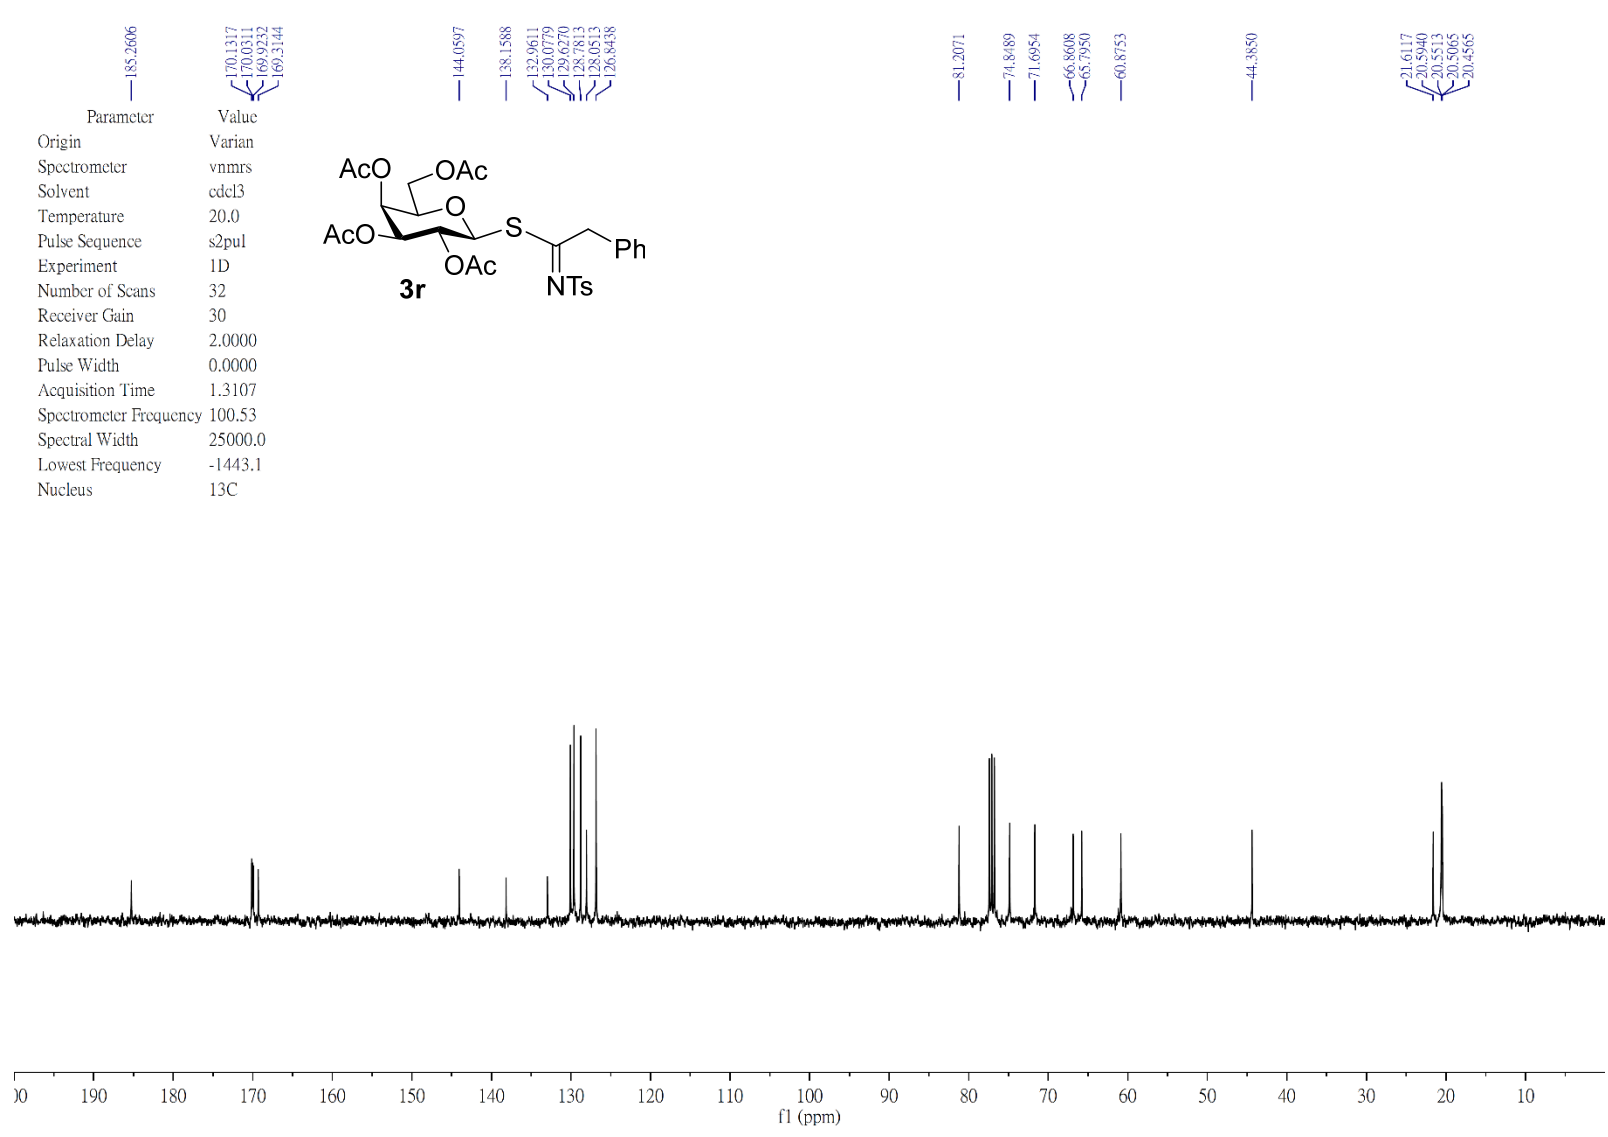

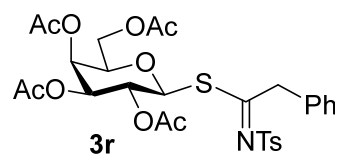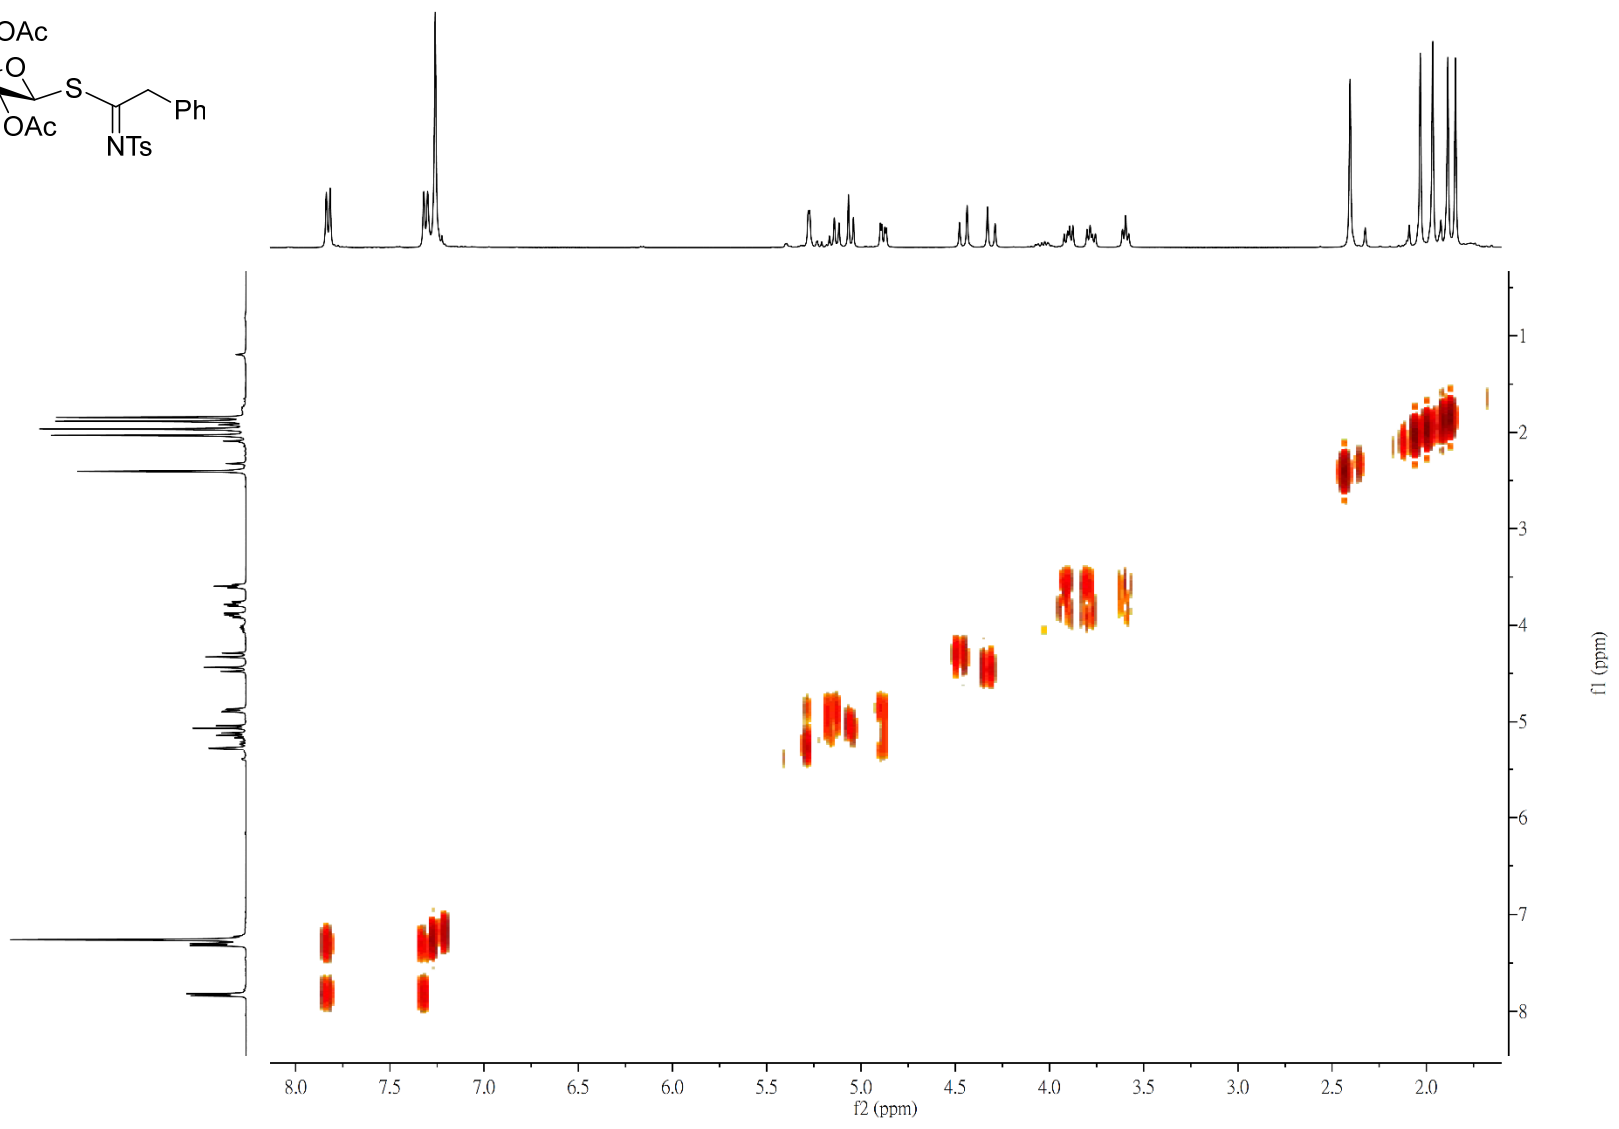

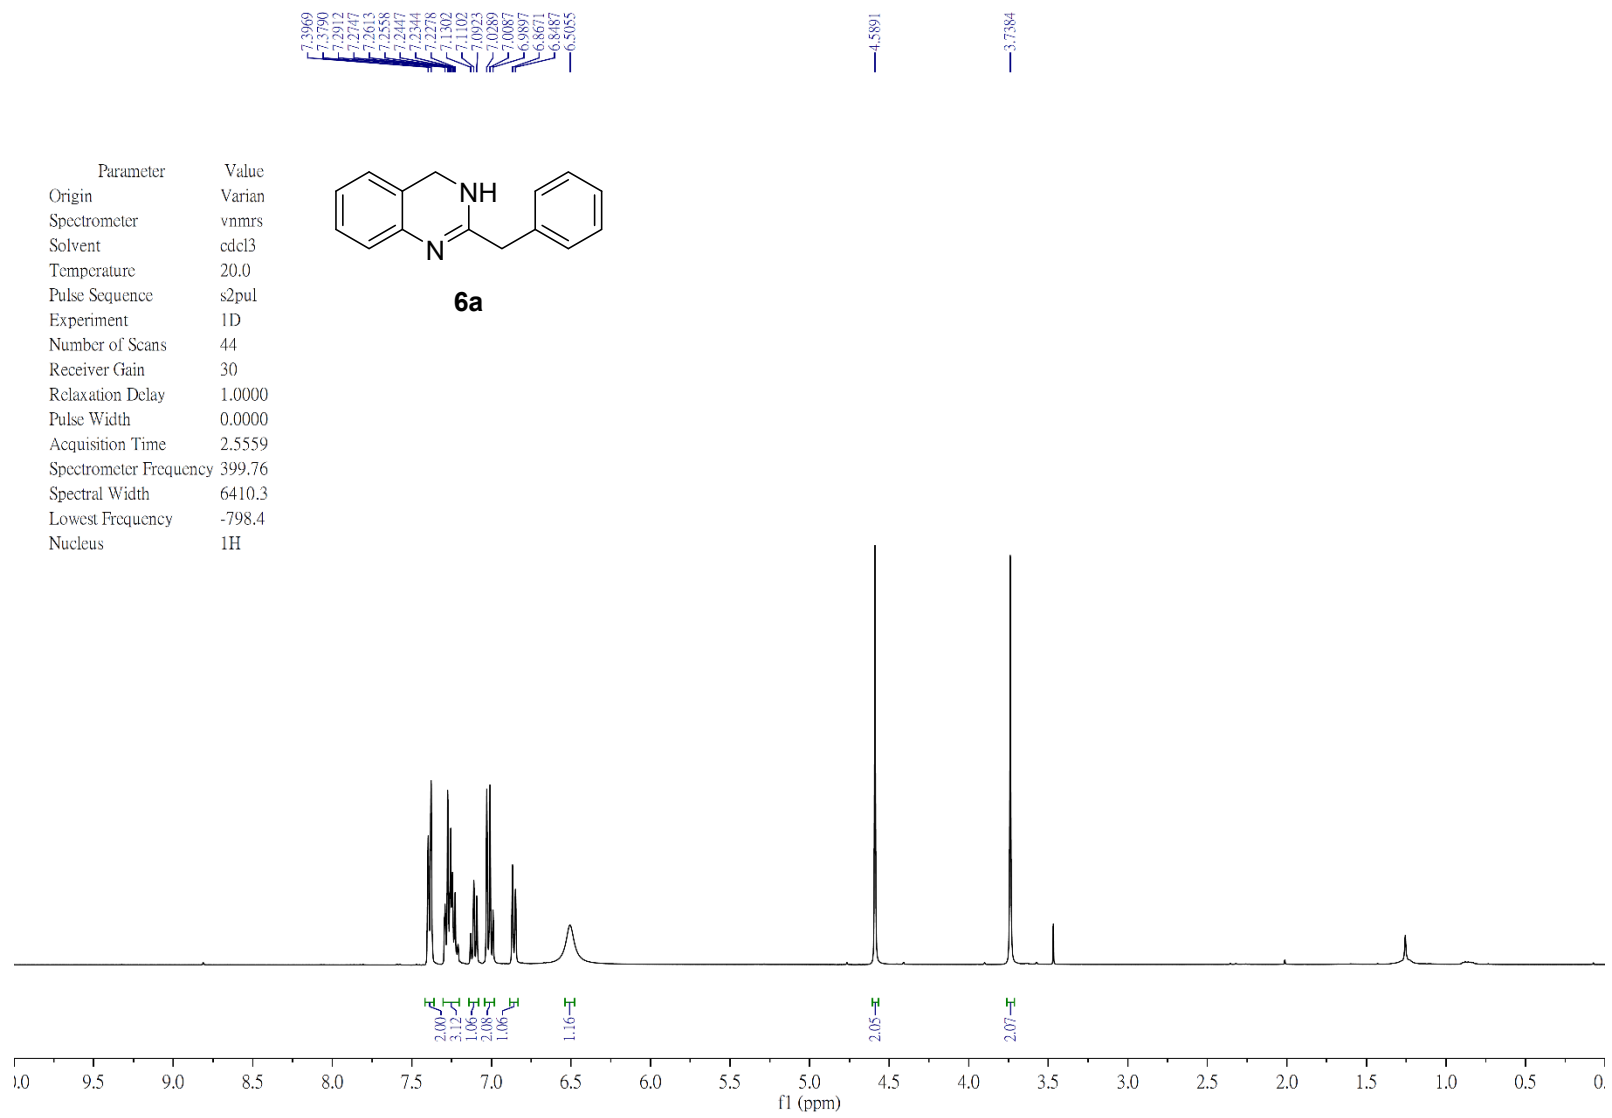



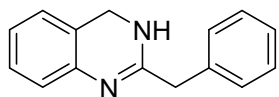

6a

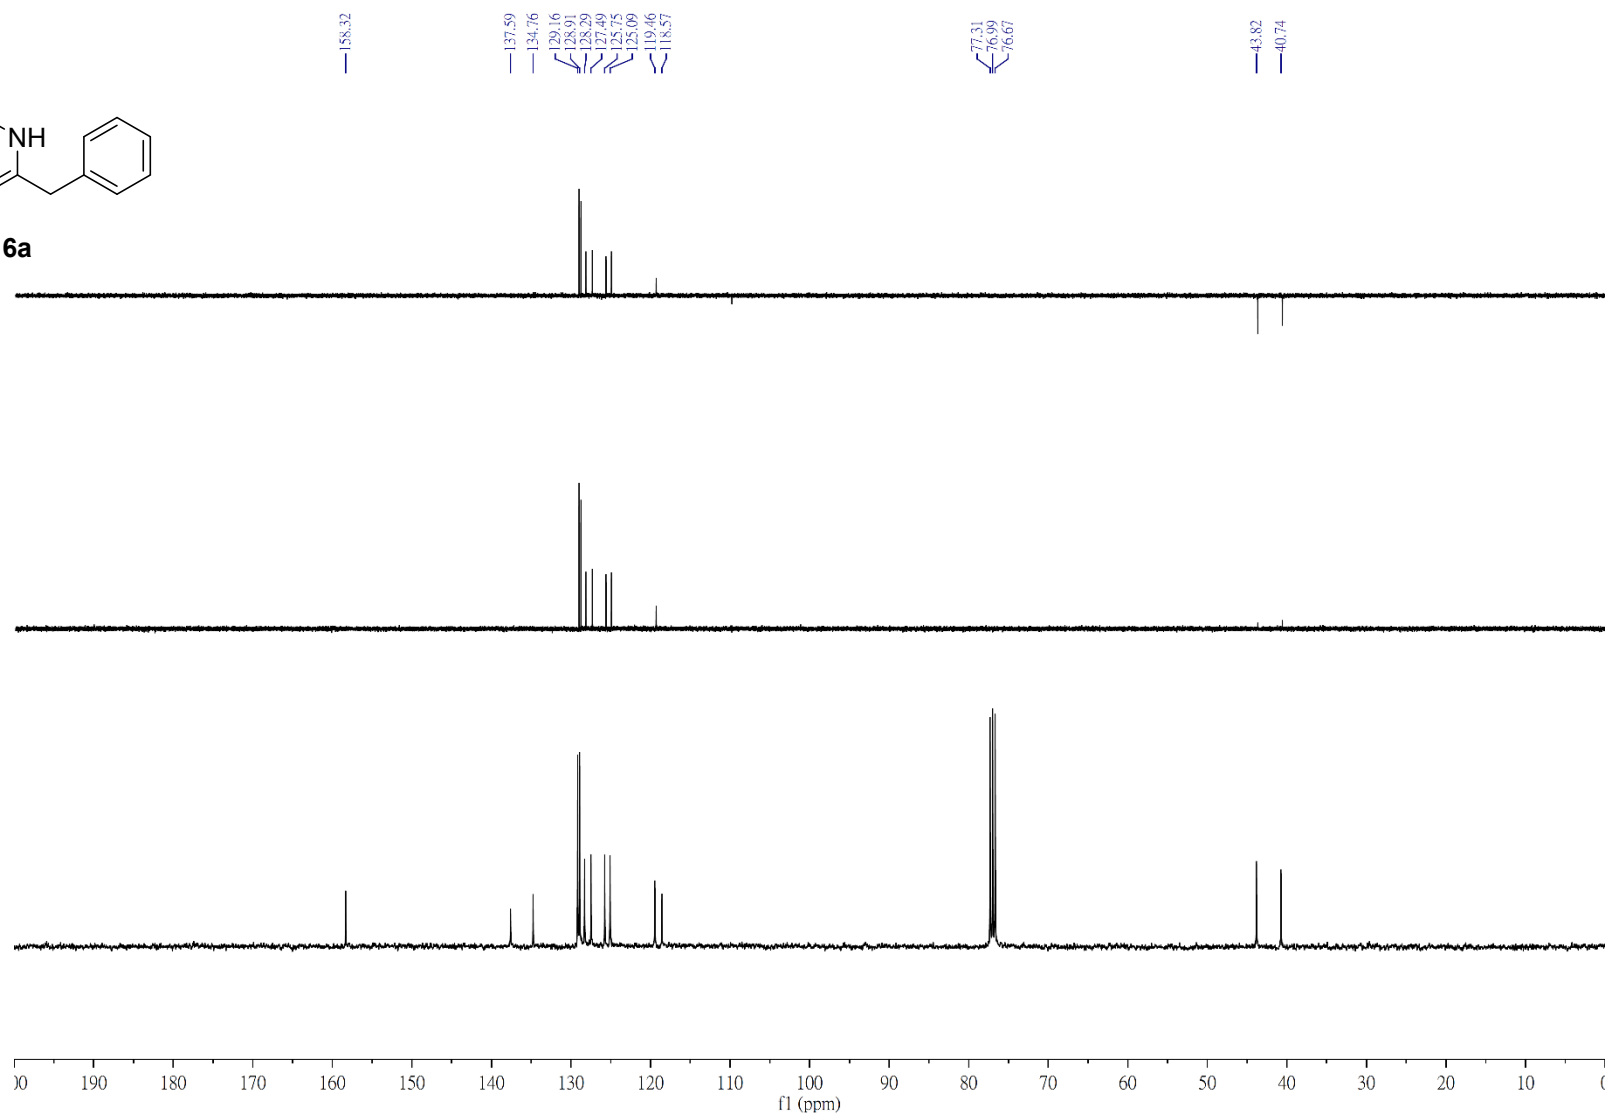

| Parameter              | Value          |
|------------------------|----------------|
| Origin                 | Varian         |
| Spectrometer           | vnmrs          |
| Solvent                | cdcl3          |
| Temperature            | 20.0           |
| Pulse Sequence         | s2pul          |
| Experiment             | 1D             |
| Number of Scans        | 44             |
| Receiver Gain          | 30             |
| Relaxation Delay       | 1.0000         |
| Pulse Width            | 0.0000         |
| Acquisition Time       | 2.5559         |
| Spectrometer Frequency | 399.76         |
| Spectral Width         | 6410.3         |
| Lowest Frequency       | -795.2         |
| Nucleus                | <sup>1</sup> H |

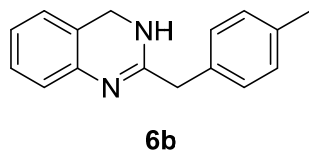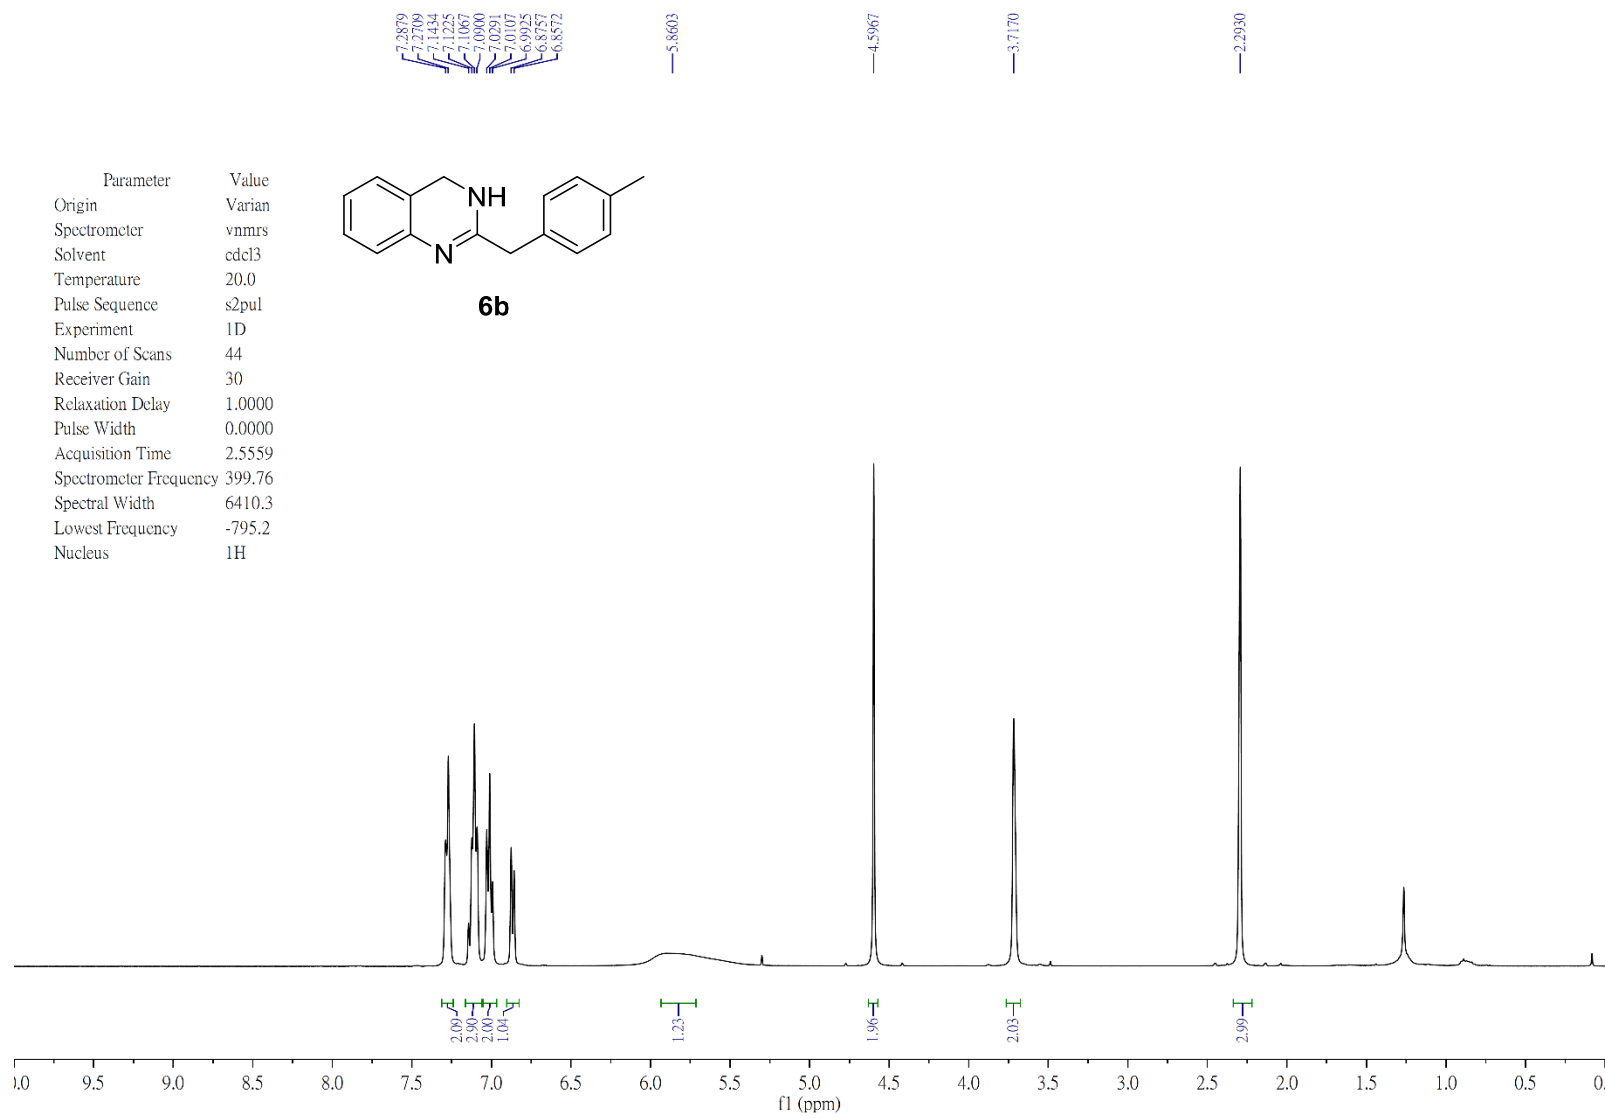

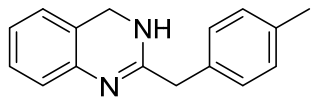

6b

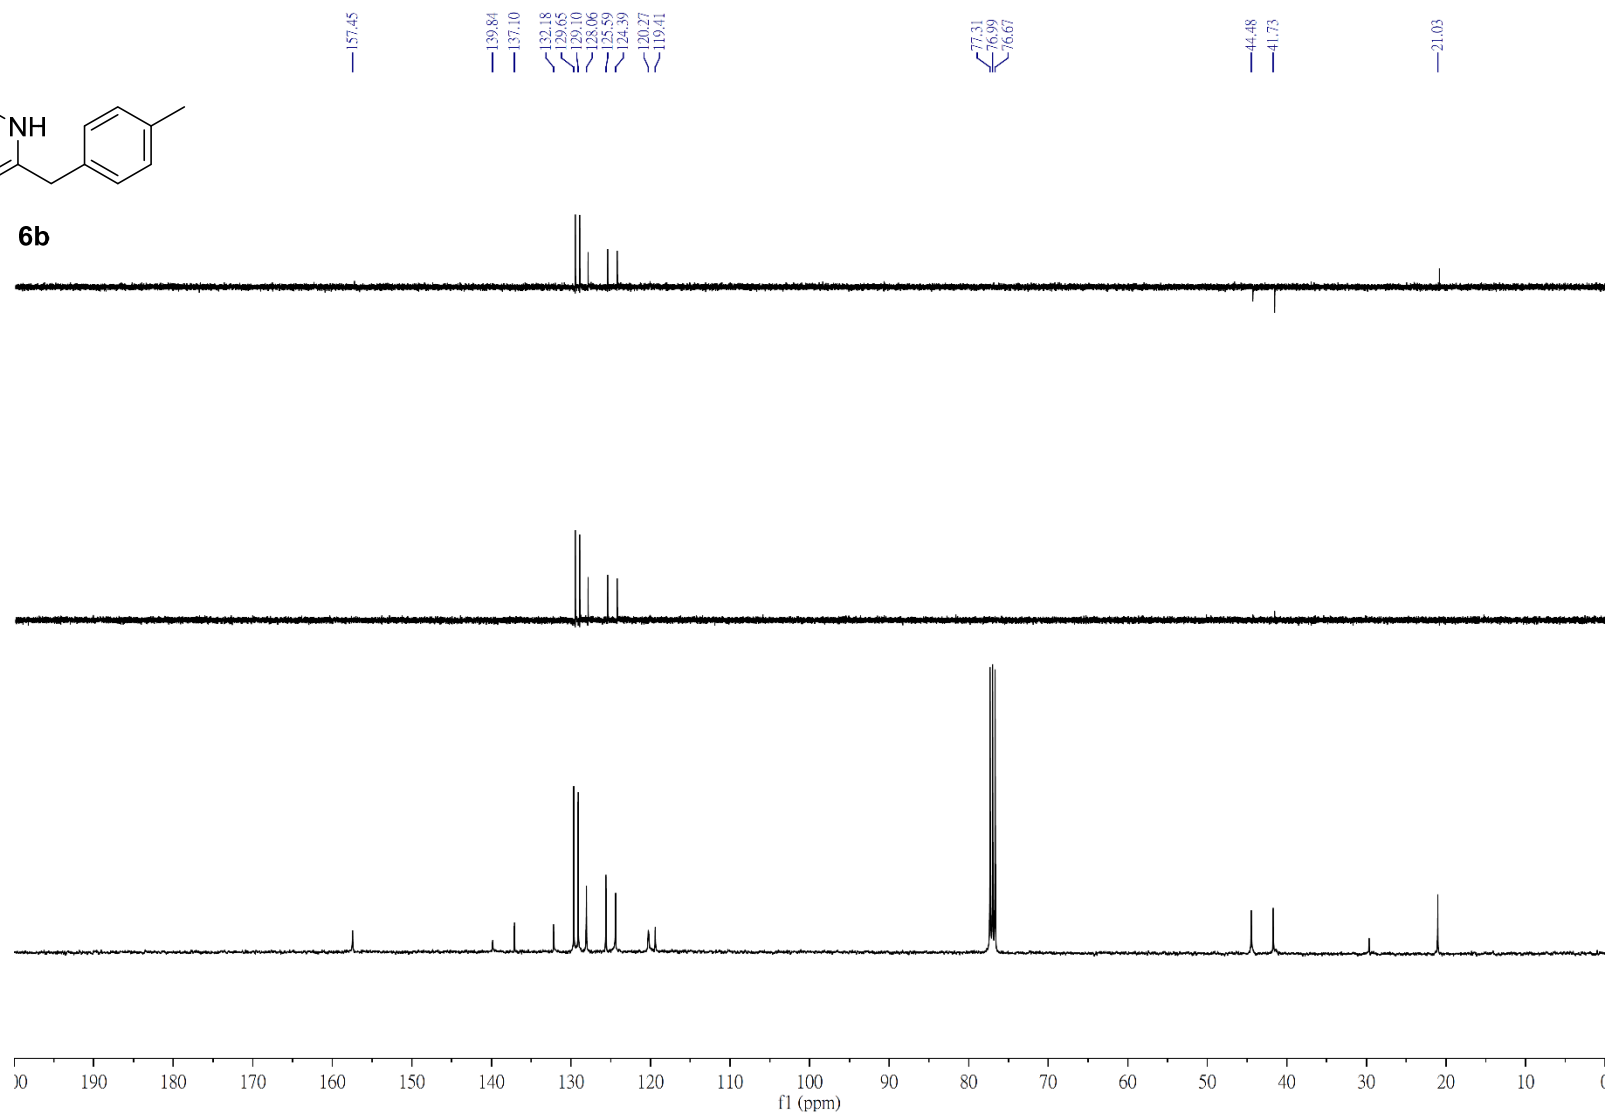

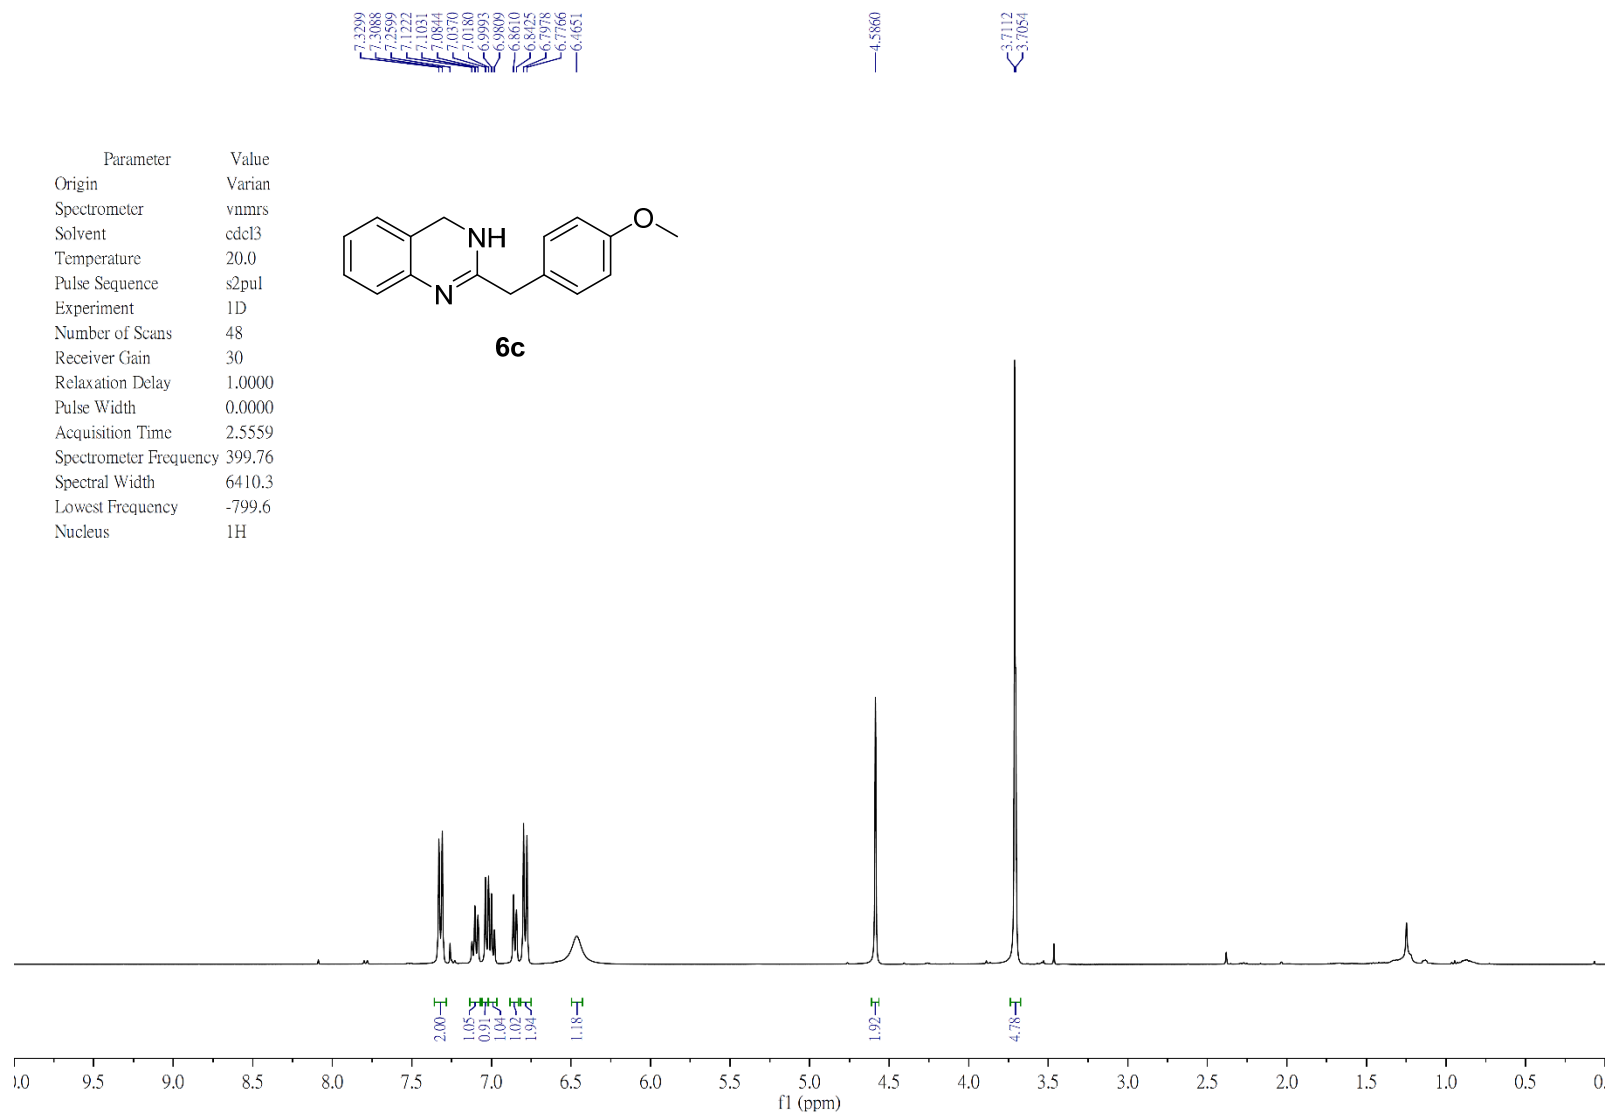

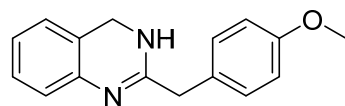

6c

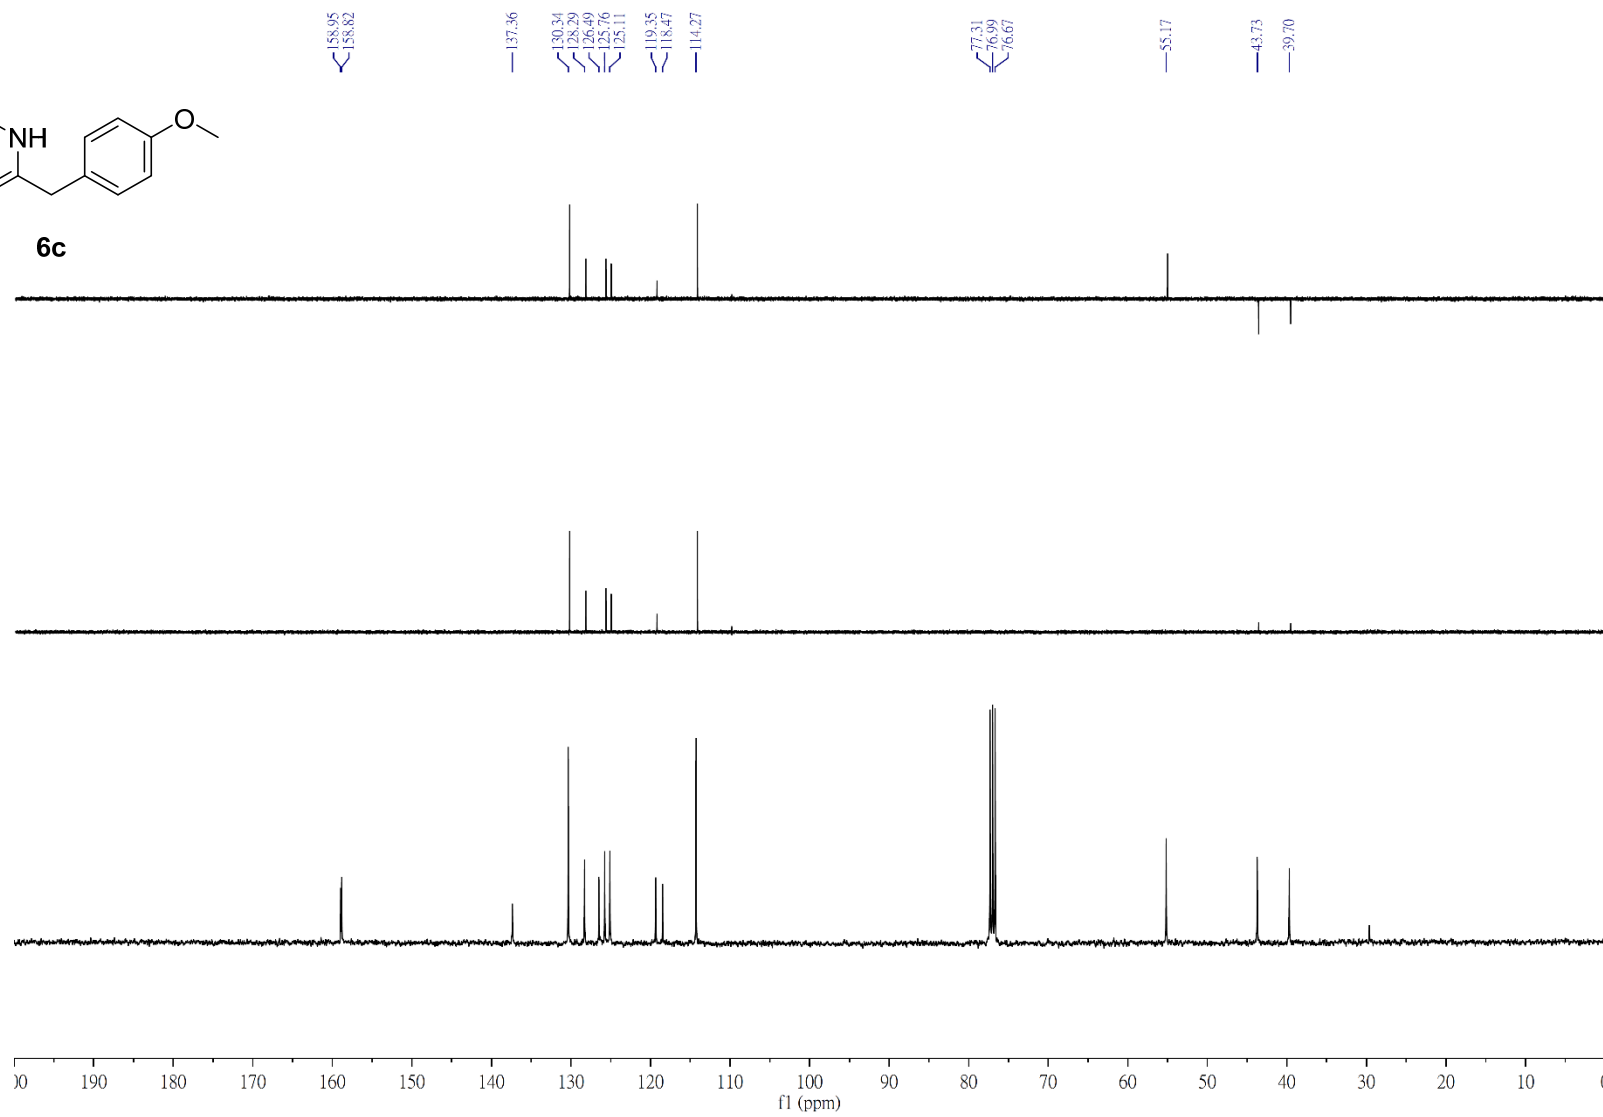

| Parameter              | Value  |
|------------------------|--------|
| Origin                 | Varian |
| Spectrometer           | nmrs   |
| Solvent                | cdcl3  |
| Temperature            | 20.0   |
| Pulse Sequence         | s2pul  |
| Experiment             | 1D     |
| Number of Scans        | 24     |
| Receiver Gain          | 30     |
| Relaxation Delay       | 1.0000 |
| Pulse Width            | 0.0000 |
| Acquisition Time       | 2.5559 |
| Spectrometer Frequency | 399.76 |
| Spectral Width         | 6410.3 |
| Lowest Frequency       | -799.6 |
| Nucleus                | 1H     |

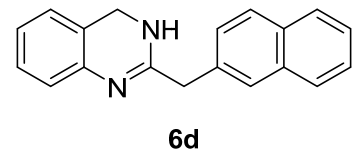

7.7670  
7.7448  
7.7309  
7.7149  
7.4430  
7.4269  
7.3600  
7.0959  
7.0811  
7.0622  
6.9682  
6.9501  
6.8015  
6.7828

5.6577

4.5250

3.8211

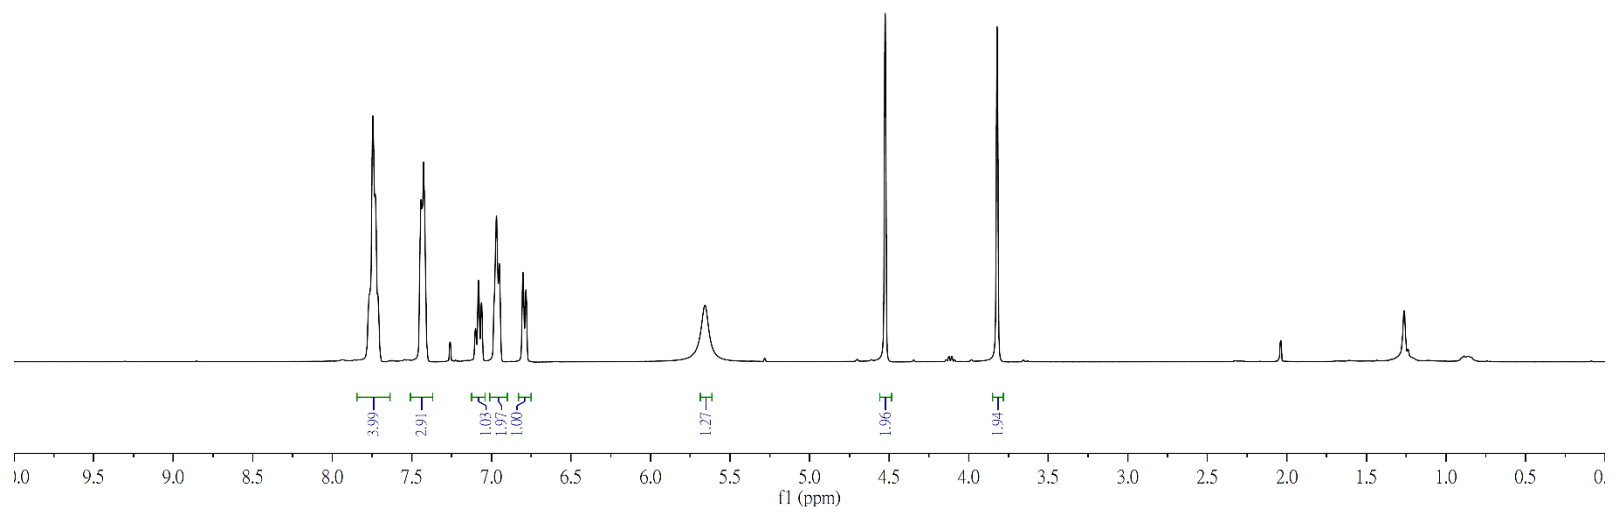

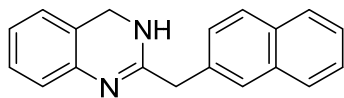

6d

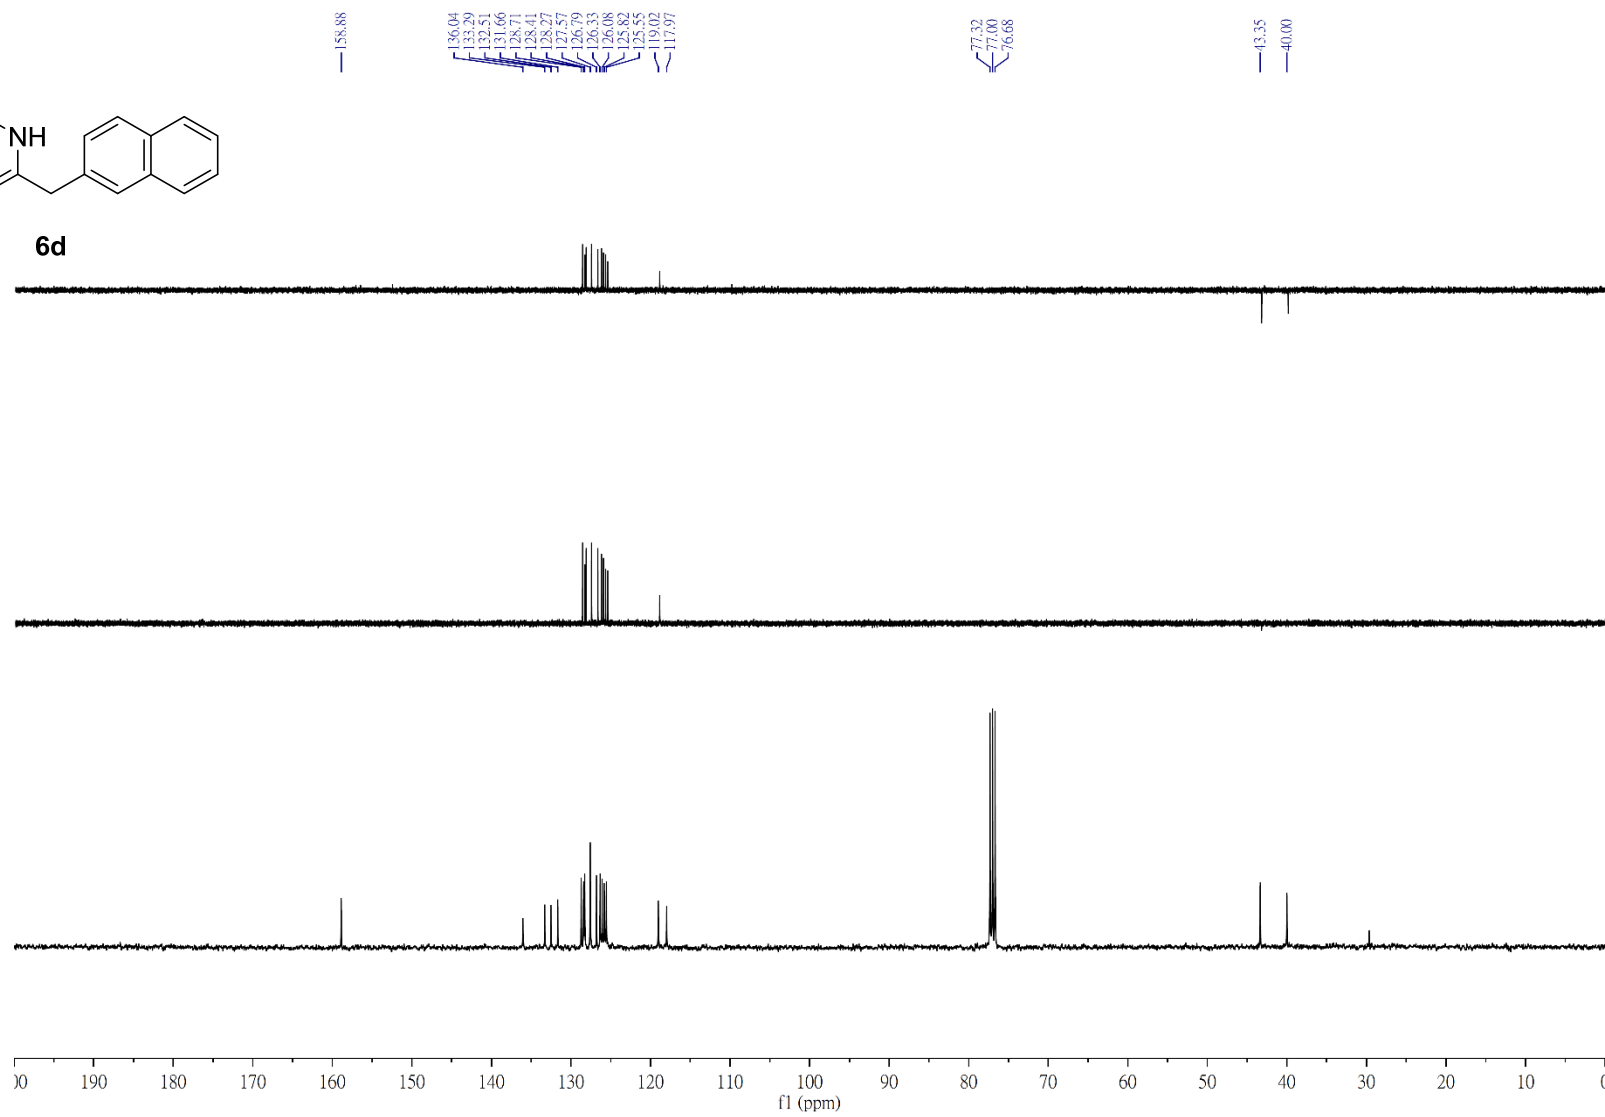

| Parameter              | Value  |
|------------------------|--------|
| Origin                 | Varian |
| Spectrometer           | nmrs   |
| Solvent                | cdcl3  |
| Temperature            | 20.0   |
| Pulse Sequence         | s2pul  |
| Experiment             | 1D     |
| Number of Scans        | 36     |
| Receiver Gain          | 30     |
| Relaxation Delay       | 1.0000 |
| Pulse Width            | 0.0000 |
| Acquisition Time       | 2.5559 |
| Spectrometer Frequency | 399.76 |
| Spectral Width         | 6410.3 |
| Lowest Frequency       | -799.4 |
| Nucleus                | 1H     |

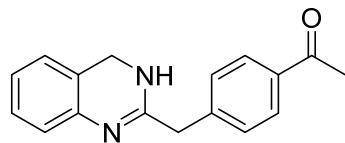

**6e**

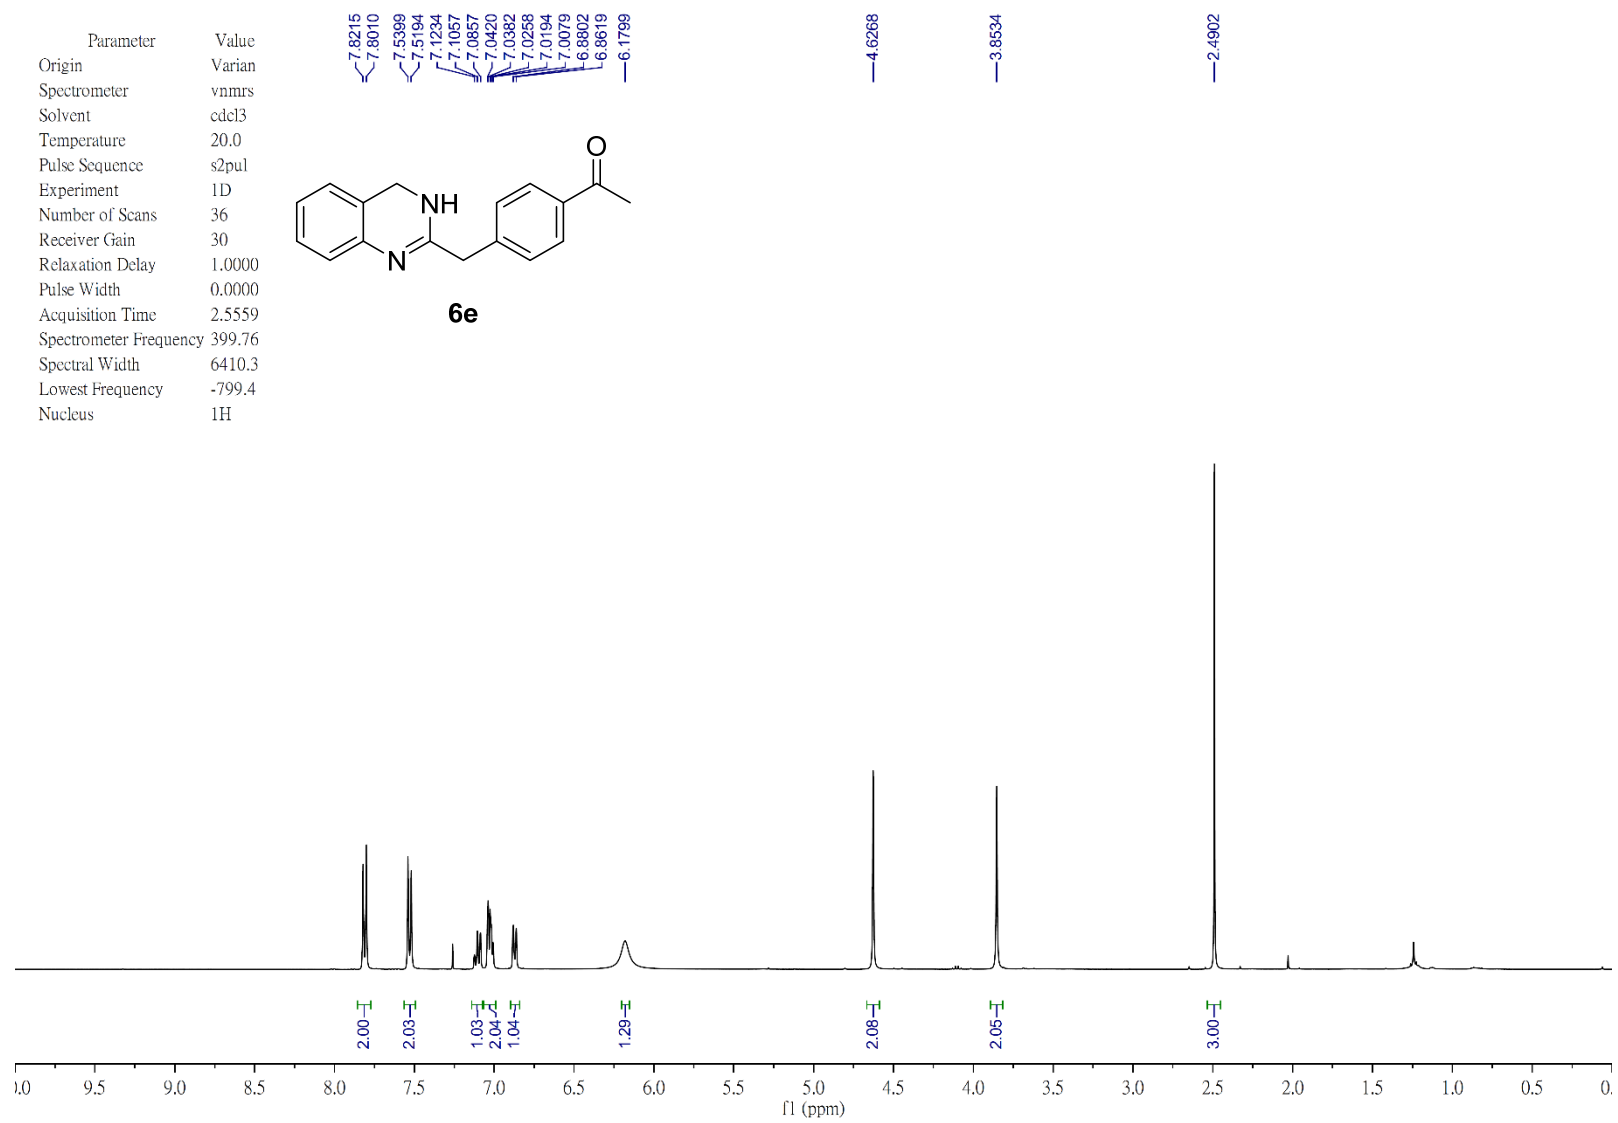



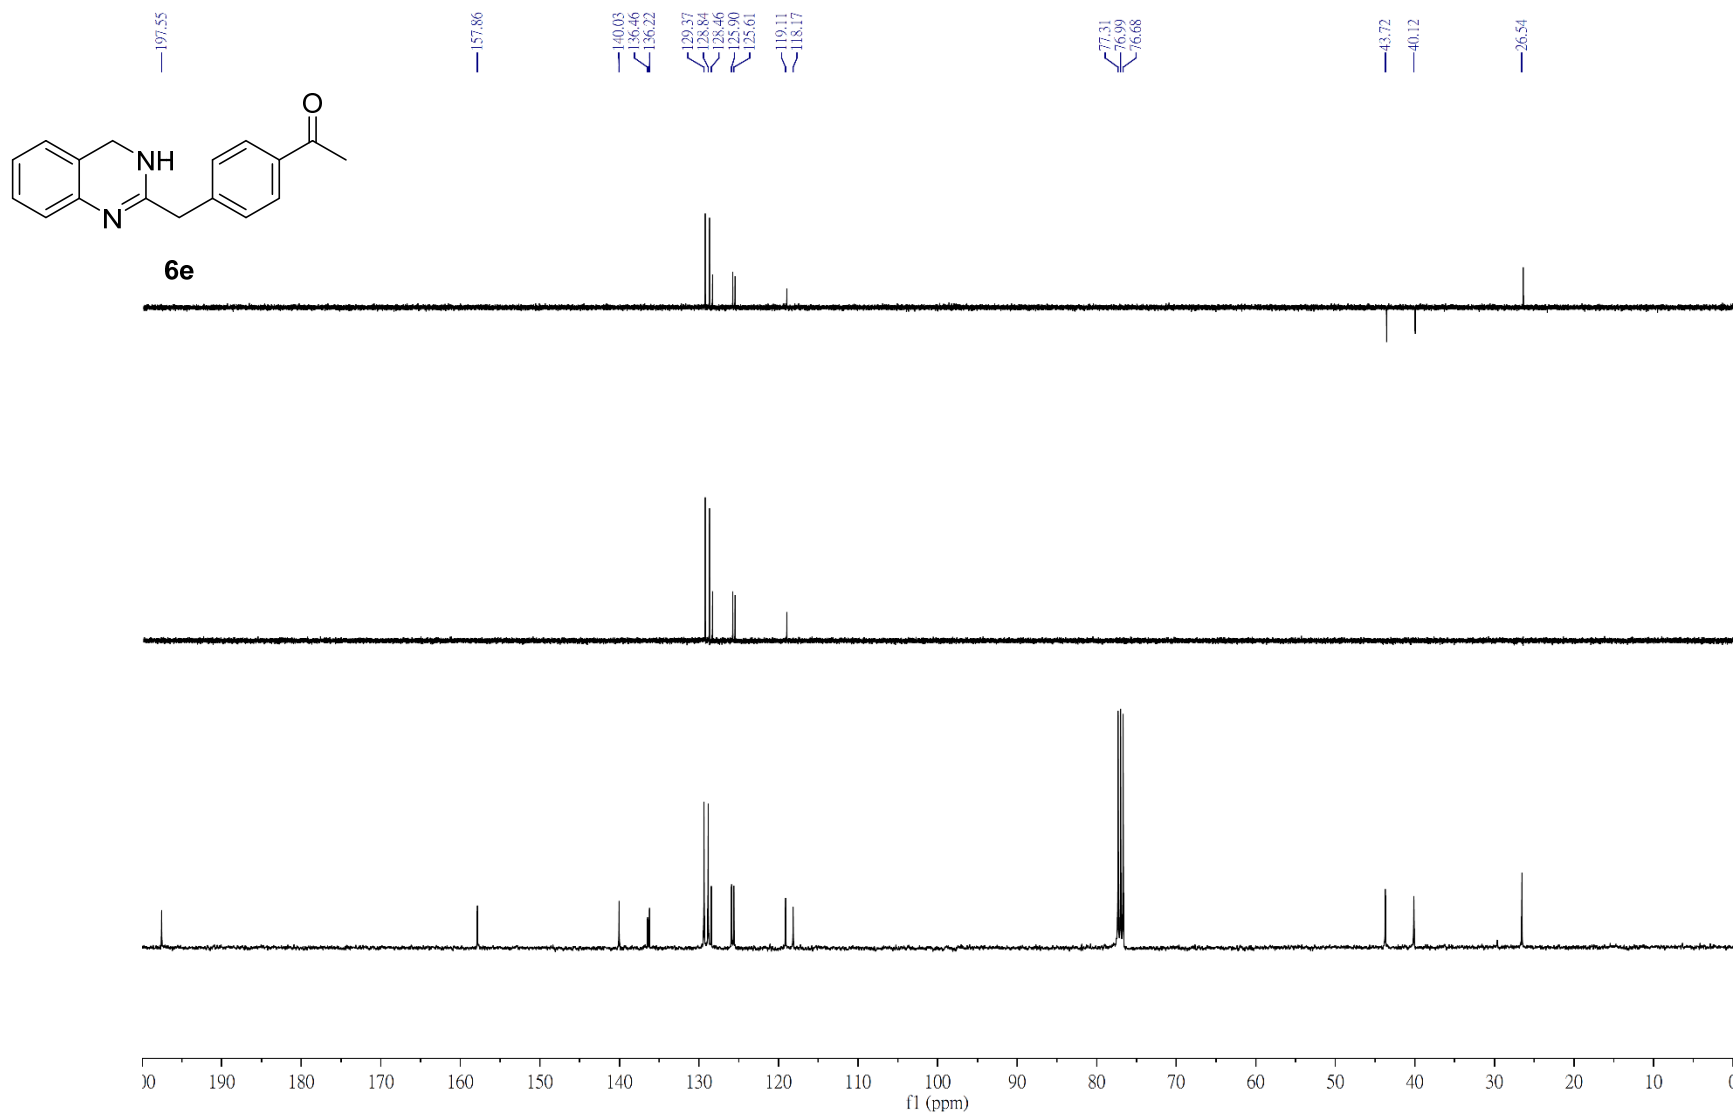

| Parameter              | Value  |
|------------------------|--------|
| Origin                 | Varian |
| Spectrometer           | nmrs   |
| Solvent                | cdcl3  |
| Temperature            | 20.0   |
| Pulse Sequence         | s2pul  |
| Experiment             | 1D     |
| Number of Scans        | 52     |
| Receiver Gain          | 30     |
| Relaxation Delay       | 1.0000 |
| Pulse Width            | 0.0000 |
| Acquisition Time       | 2.5559 |
| Spectrometer Frequency | 399.76 |
| Spectral Width         | 6410.3 |
| Lowest Frequency       | -799.6 |
| Nucleus                | 1H     |

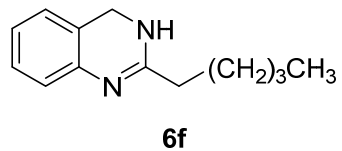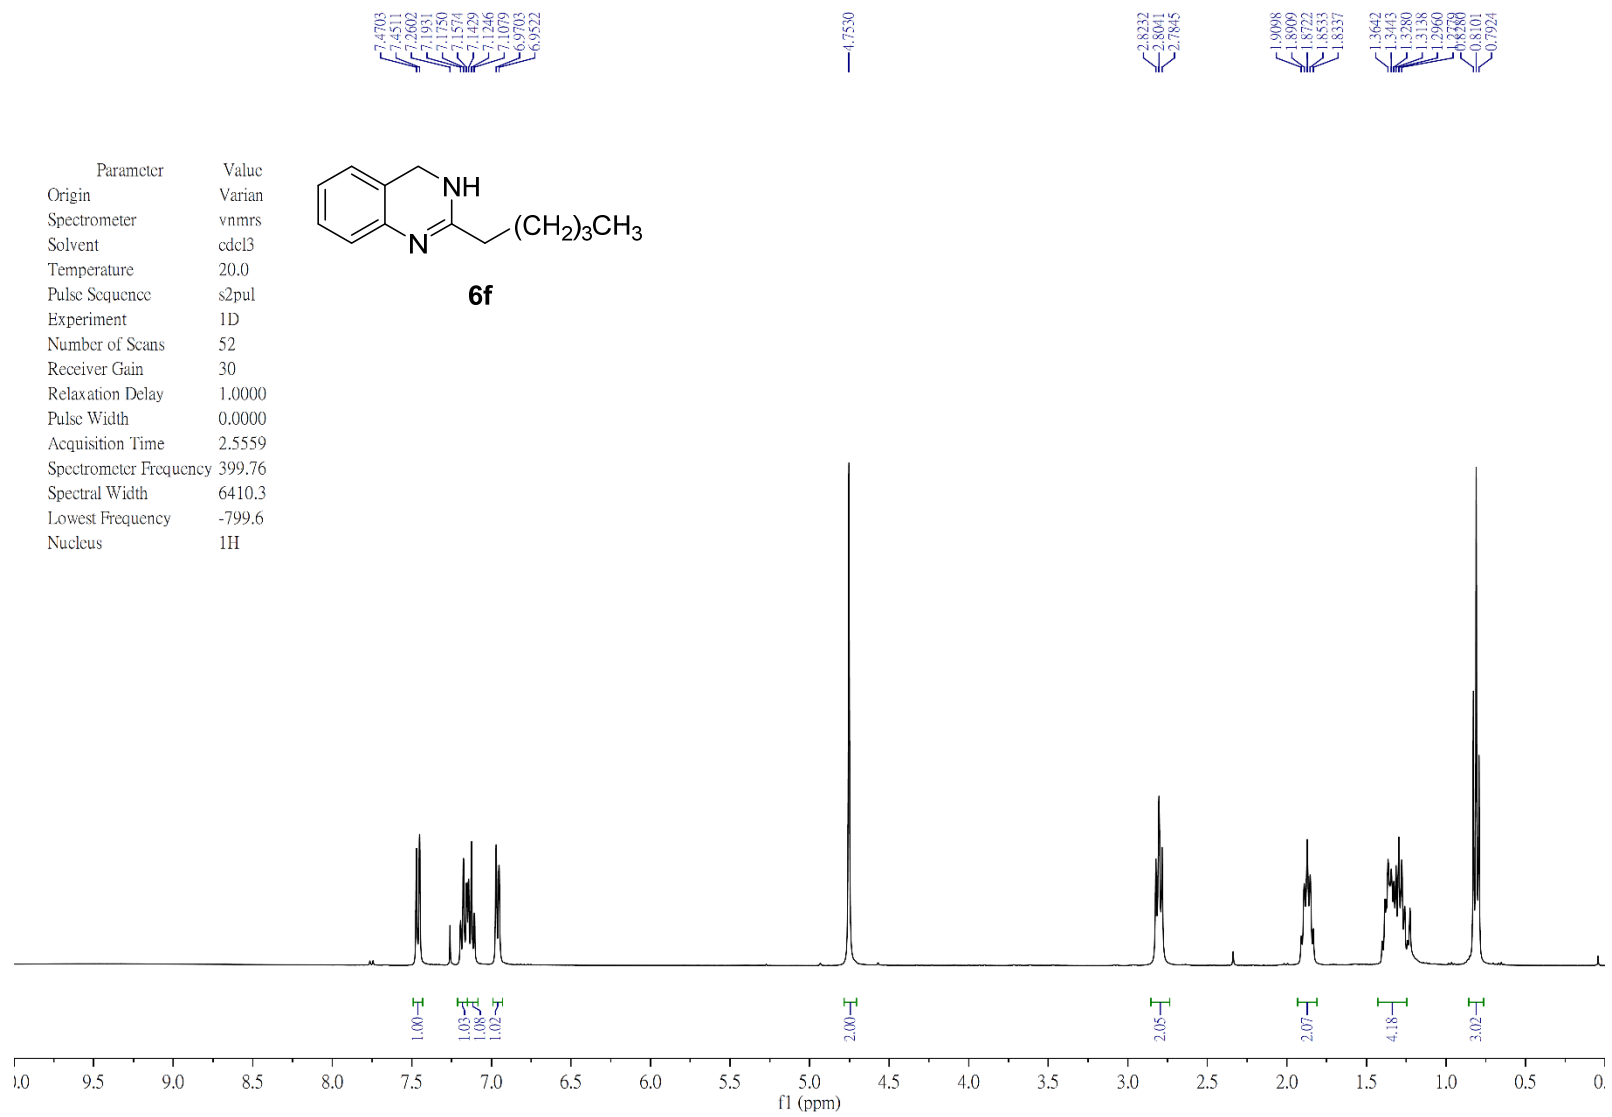

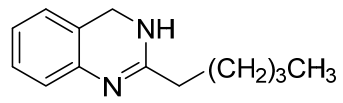

6f

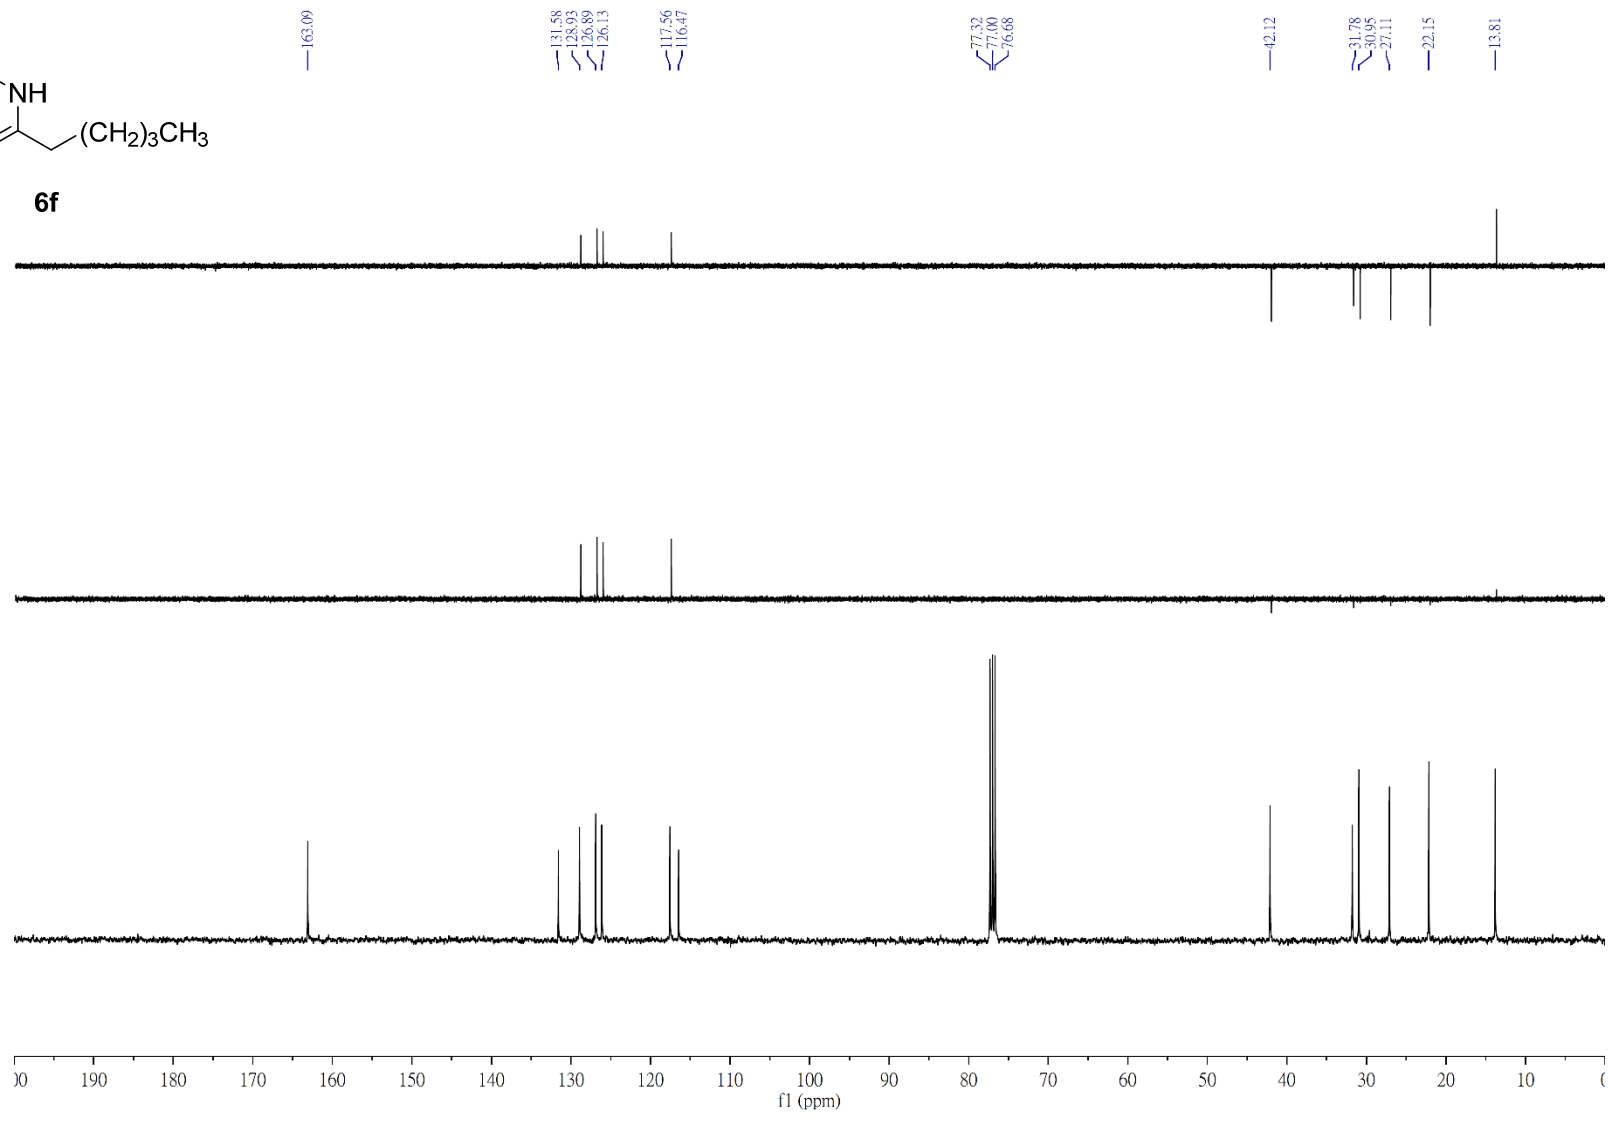

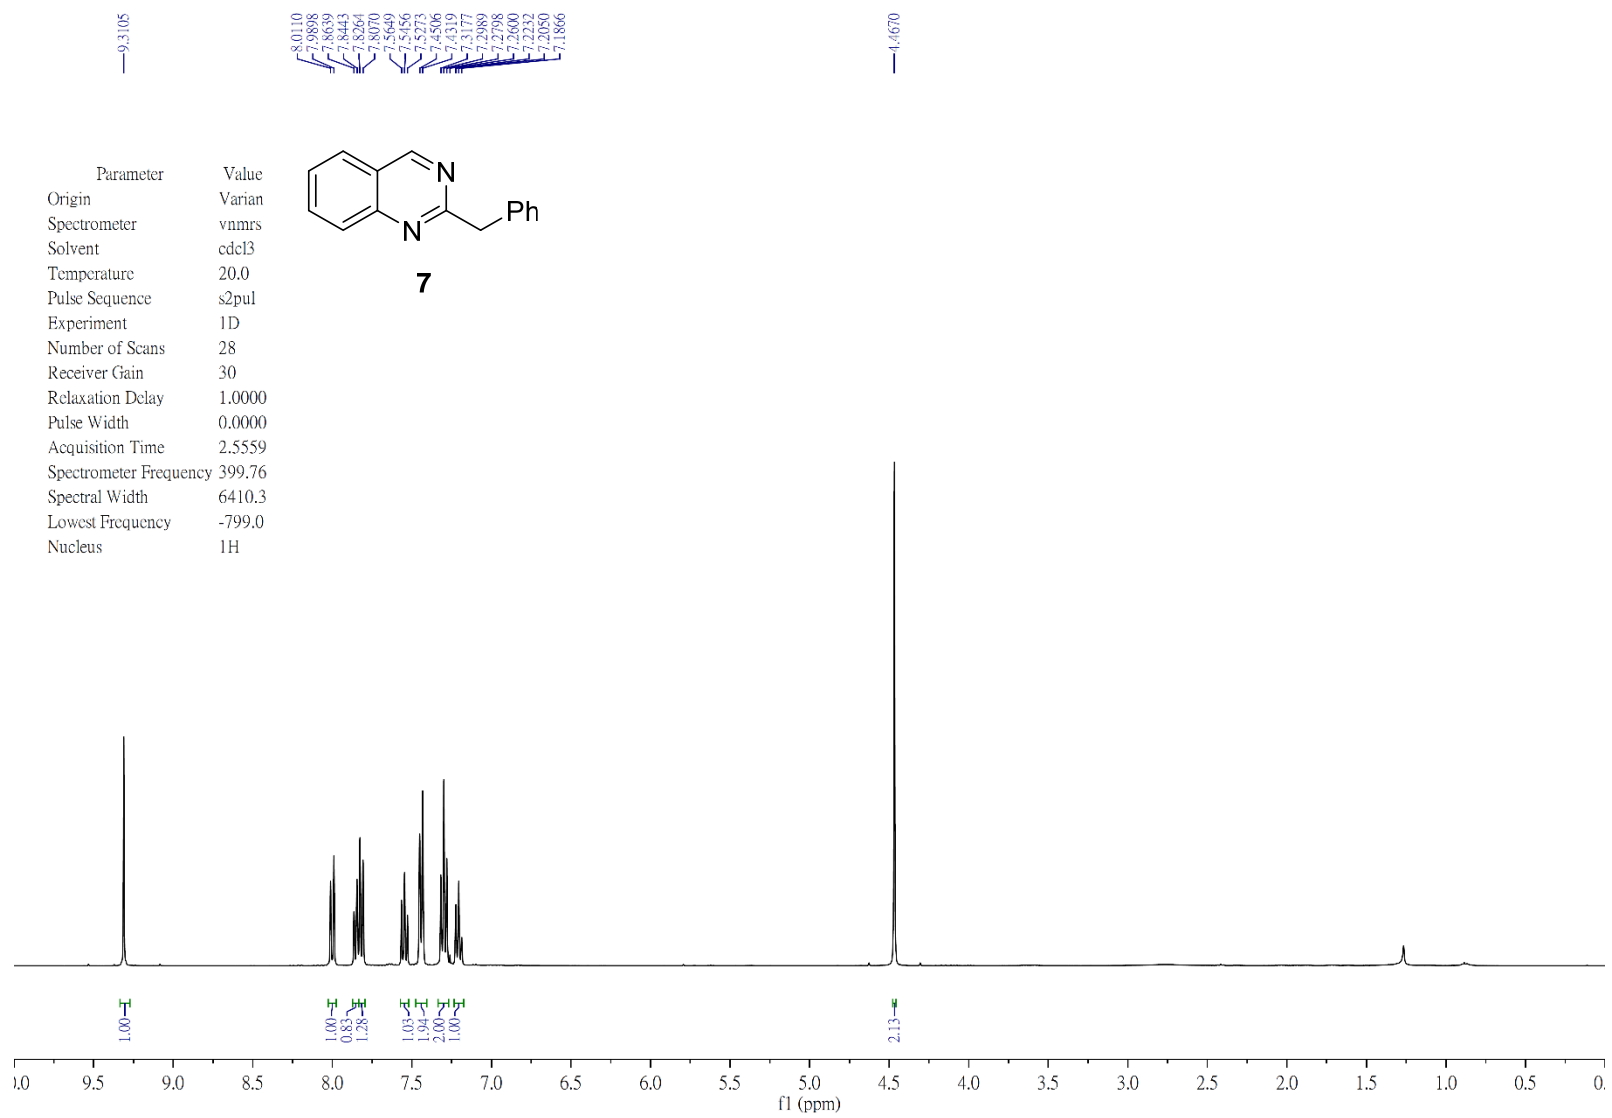

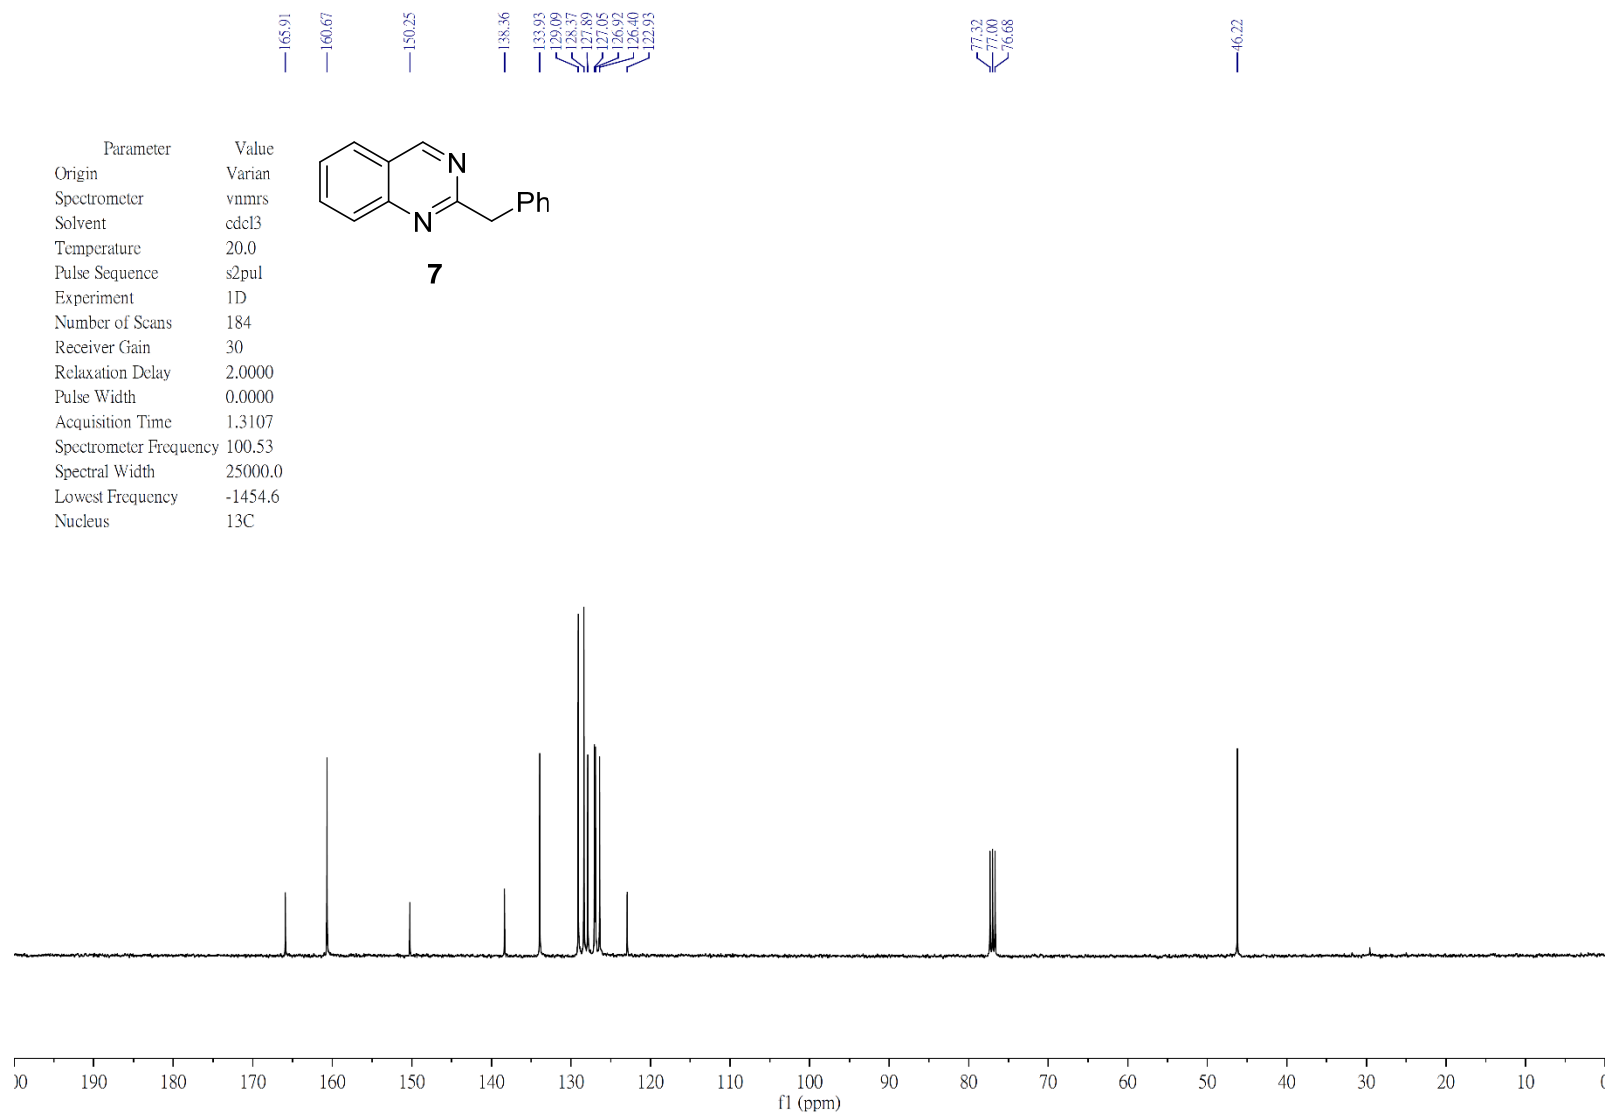

| Parameter              | Value  |
|------------------------|--------|
| Origin                 | Varian |
| Spectrometer           | nmrs   |
| Solvent                | cdcl3  |
| Temperature            | 20.0   |
| Pulse Sequence         | s2pul  |
| Experiment             | 1D     |
| Number of Scans        | 28     |
| Receiver Gain          | 54     |
| Relaxation Delay       | 1.0000 |
| Pulse Width            | 0.0000 |
| Acquisition Time       | 2.5559 |
| Spectrometer Frequency | 399.76 |
| Spectral Width         | 6410.3 |
| Lowest Frequency       | -800.2 |
| Nucleus                | 1H     |

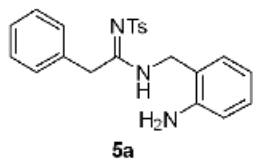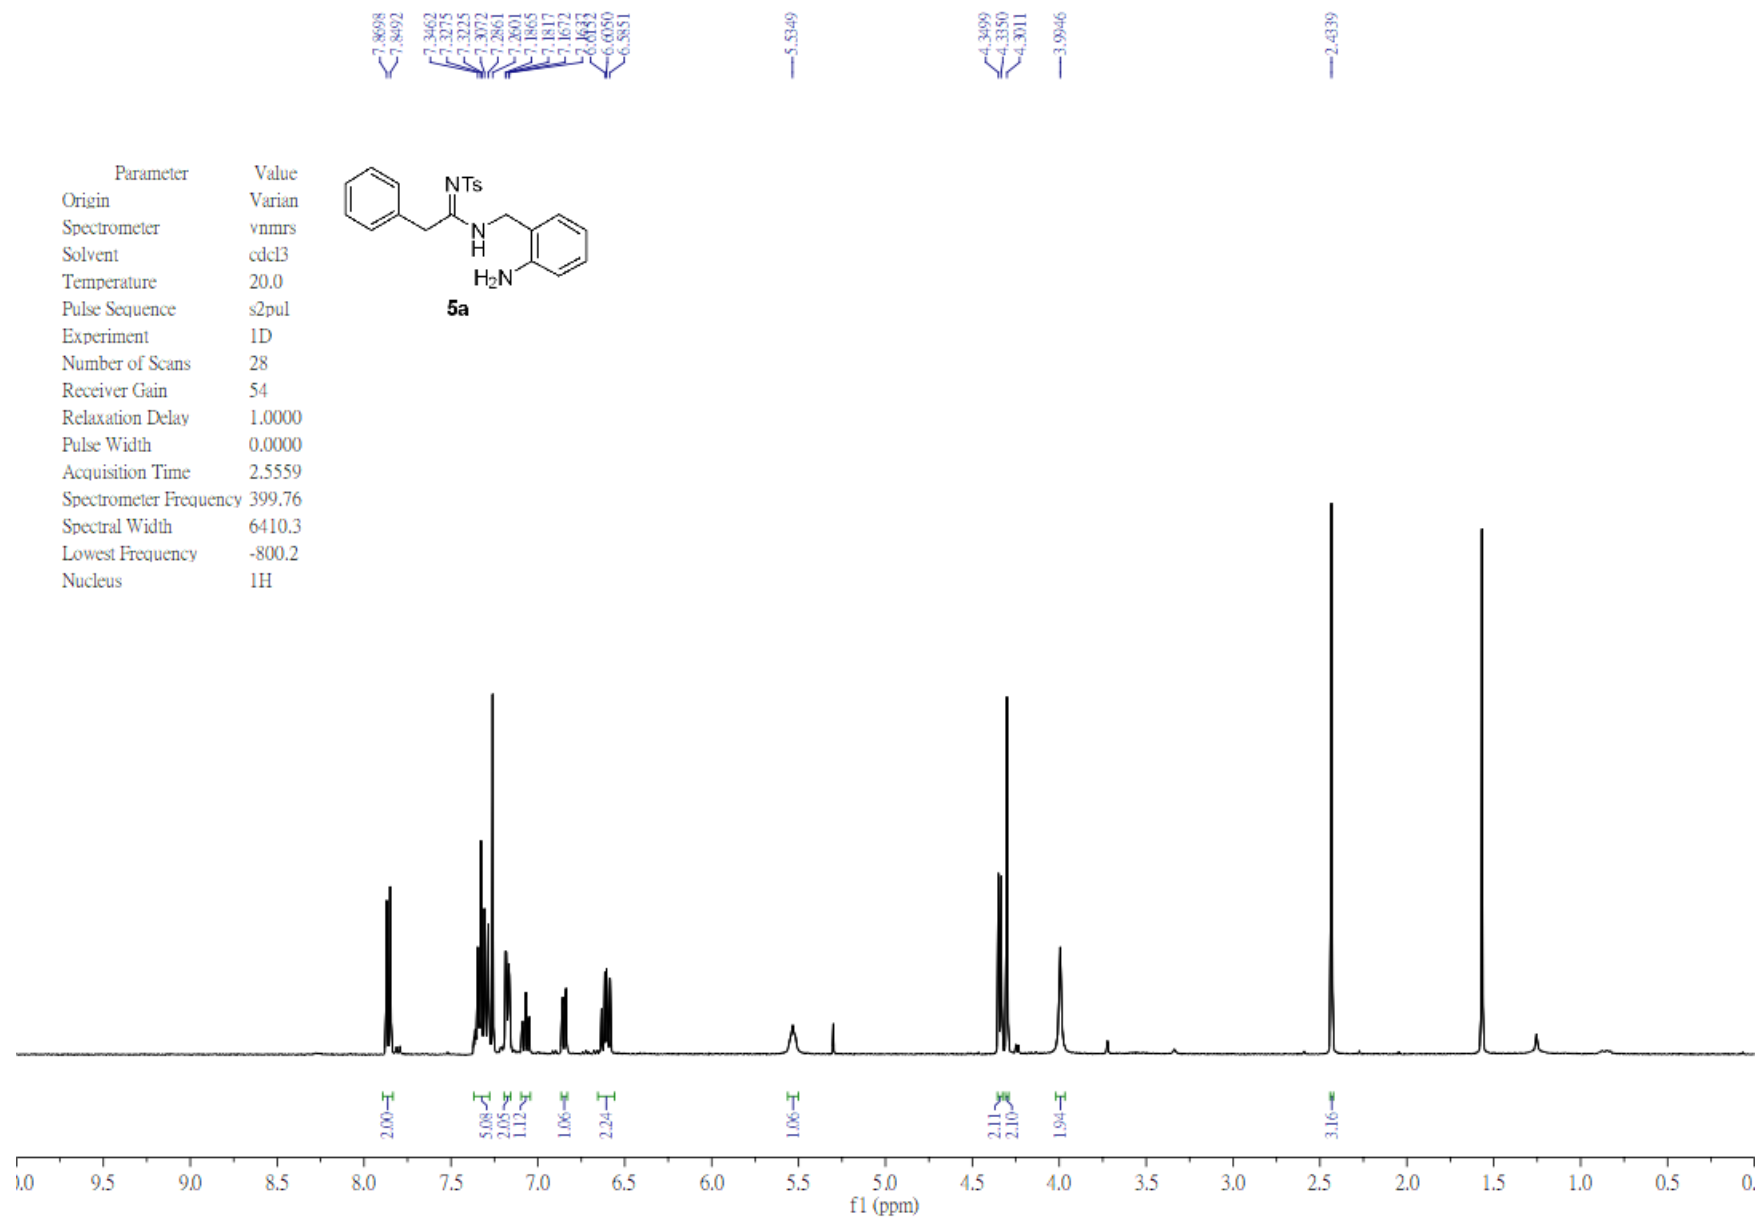

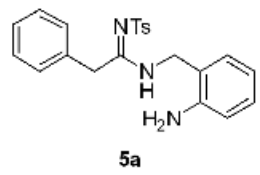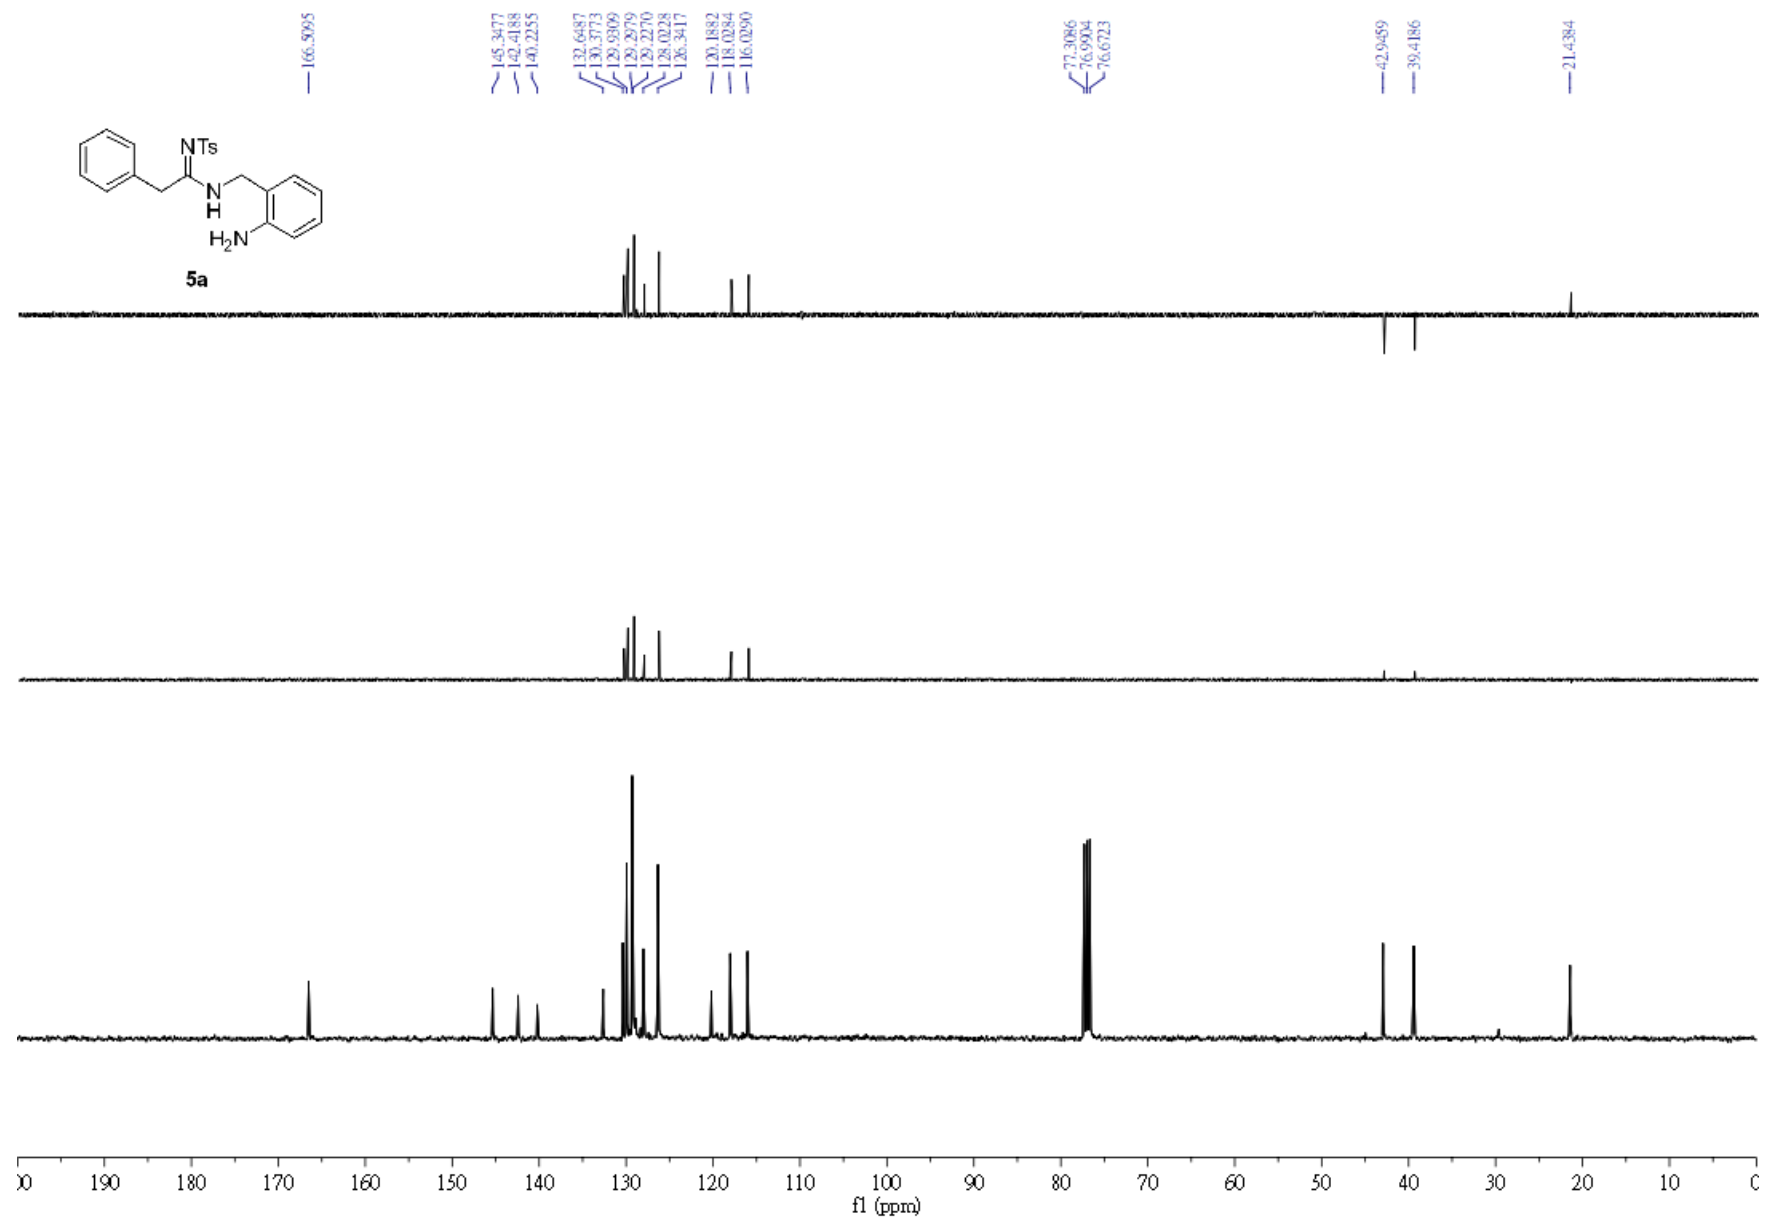

Supplement: d0ob01963a1.pdf [file d0ob01963a1.pdf]
